# Supplementary material for: Human iPSC-based modeling reveals coding and non-coding transcriptomic alterations associated with RFX3 deficiency in pancreatic islets
Source: Research Square preprint supplement (doi:10.21203/rs.3.rs-7435927/v1), 2025-09-12
Supplement: Supplementary file 1 [file 63b4fd4e3a3a08d654424d76.xlsx]

## Sheet: Sheet1
Supplementary Table 6: miRanda integration analysis between downregulated DElncRNA and upregulated DEmiRs
miRNA_ID	lncRNA_gene_ID	lncRNA_transcript_ID	lncRNA_gene_NAME	Total_score	Total_Energy	Max_Score	Max_Energy	Strand	miRNA_Length	lncRNA_Length	Alignment_Positions
hsa-miR-451a	ENSG00000225880	ENST00000743857.1	LINC00115	289	-29.78	149	-18.45	69	22	1714	478
hsa-miR-451a	ENSG00000225880	ENST00000744078.1	LINC00115	149	-18.45	149	-18.45	70	22	1748	1419
hsa-miR-451a	ENSG00000225880	ENST00000743859.1	LINC00115	149	-18.45	149	-18.45	71	22	743	527
hsa-miR-451a	ENSG00000125462	ENST00000608007.1	C1orf61	141	-16.44	141	-16.44	241	22	3138	486
hsa-miR-451a	ENSG00000125462	ENST00000488498.2	C1orf61	143	-16.41	143	-16.41	375	22	4774	1296
hsa-miR-451a	ENSG00000125462	ENST00000758325.1	C1orf61	143	-16.41	143	-16.41	392	22	1059	671
hsa-miR-451a	ENSG00000125462	ENST00000702770.2	C1orf61	143	-16.41	143	-16.41	393	22	913	526
hsa-miR-451a	ENSG00000125462	ENST00000702999.2	C1orf61	143	-16.41	143	-16.41	394	22	838	451
hsa-miR-451a	ENSG00000125462	ENST00000703093.1	C1orf61	143	-16.41	143	-16.41	395	22	1072	687
hsa-miR-451a	ENSG00000125462	ENST00000702975.2	C1orf61	143	-16.41	143	-16.41	396	22	915	530
hsa-miR-451a	ENSG00000125462	ENST00000702047.1	C1orf61	143	-16.41	143	-16.41	397	22	1210	825
hsa-miR-451a	ENSG00000125462	ENST00000703094.1	C1orf61	143	-16.41	143	-16.41	398	22	1096	713
hsa-miR-451a	ENSG00000125462	ENST00000703000.2	C1orf61	143	-16.41	143	-16.41	399	22	940	560
hsa-miR-451a	ENSG00000125462	ENST00000758326.1	C1orf61	143	-16.41	143	-16.41	400	22	870	490
hsa-miR-451a	ENSG00000125462	ENST00000702937.1	C1orf61	143	-16.41	143	-16.41	401	22	990	612
hsa-miR-451a	ENSG00000125462	ENST00000758348.1	C1orf61	143	-16.41	143	-16.41	402	22	832	457
hsa-miR-451a	ENSG00000125462	ENST00000703084.2	C1orf61	143	-16.41	143	-16.41	403	22	916	541
hsa-miR-451a	ENSG00000125462	ENST00000702953.2	C1orf61	143	-16.41	143	-16.41	404	22	1733	1358
hsa-miR-451a	ENSG00000125462	ENST00000703083.2	C1orf61	143	-16.41	143	-16.41	405	22	944	569
hsa-miR-451a	ENSG00000125462	ENST00000758367.1	C1orf61	143	-16.41	143	-16.41	406	22	829	457
hsa-miR-451a	ENSG00000125462	ENST00000703088.1	C1orf61	143	-16.41	143	-16.41	407	22	925	555
hsa-miR-451a	ENSG00000125462	ENST00000702915.1	C1orf61	143	-16.41	143	-16.41	408	22	1381	1016
hsa-miR-451a	ENSG00000125462	ENST00000489918.1	C1orf61	143	-16.41	143	-16.41	409	22	427	389
hsa-miR-451a	ENSG00000268471	ENST00000604157.2	MIR4453HG	140	-19.11	140	-19.11	716	22	3004	174
hsa-miR-451a	ENSG00000245526	ENST00000669424.1	LINC00461	284	-29.81	143	-15.22	845	22	8262	1254
hsa-miR-451a	ENSG00000245526	ENST00000670494.2	LINC00461	284	-29.81	143	-15.22	846	22	7579	637
hsa-miR-451a	ENSG00000245526	ENST00000664240.2	LINC00461	143	-15.22	143	-15.22	847	22	6250	740
hsa-miR-451a	ENSG00000245526	ENST00000662060.1	LINC00461	143	-15.22	143	-15.22	848	22	5116	587
hsa-miR-451a	ENSG00000245526	ENST00000665062.2	LINC00461	143	-15.22	143	-15.22	849	22	4332	730
hsa-miR-451a	ENSG00000245526	ENST00000665865.2	LINC00461	143	-15.22	143	-15.22	850	22	4522	925
hsa-miR-451a	ENSG00000245526	ENST00000668089.2	LINC00461	143	-15.22	143	-15.22	851	22	2012	532
hsa-miR-451a	ENSG00000245526	ENST00000656755.2	LINC00461	143	-15.22	143	-15.22	852	22	2074	649
hsa-miR-451a	ENSG00000245526	ENST00000659156.2	LINC00461	143	-15.22	143	-15.22	853	22	2239	814
hsa-miR-451a	ENSG00000245526	ENST00000666297.2	LINC00461	143	-15.22	143	-15.22	854	22	1825	604
hsa-miR-451a	ENSG00000245526	ENST00000701425.2	LINC00461	143	-15.22	143	-15.22	855	22	945	551
hsa-miR-451a	ENSG00000245526	ENST00000689967.2	LINC00461	143	-15.22	143	-15.22	856	22	884	490
hsa-miR-451a	ENSG00000245526	ENST00000506664.8	LINC00461	143	-15.22	143	-15.22	857	22	813	422
hsa-miR-451a	ENSG00000245526	ENST00000701556.2	LINC00461	143	-15.22	143	-15.22	858	22	822	481
hsa-miR-451a	ENSG00000245526	ENST00000787089.1	LINC00461	143	-15.22	143	-15.22	859	22	1164	823
hsa-miR-451a	ENSG00000245526	ENST00000513805.7	LINC00461	143	-15.22	143	-15.22	860	22	890	549
hsa-miR-451a	ENSG00000245526	ENST00000787083.1	LINC00461	143	-15.22	143	-15.22	861	22	672	331
hsa-miR-451a	ENSG00000245526	ENST00000687262.2	LINC00461	143	-15.22	143	-15.22	862	22	896	555
hsa-miR-451a	ENSG00000245526	ENST00000787081.1	LINC00461	143	-15.22	143	-15.22	863	22	833	492
hsa-miR-451a	ENSG00000245526	ENST00000787075.1	LINC00461	143	-15.22	143	-15.22	864	22	957	616
hsa-miR-451a	ENSG00000245526	ENST00000787072.1	LINC00461	143	-15.22	143	-15.22	865	22	975	634
hsa-miR-451a	ENSG00000245526	ENST00000787078.1	LINC00461	143	-15.22	143	-15.22	866	22	939	600
hsa-miR-451a	ENSG00000245526	ENST00000787092.1	LINC00461	143	-15.22	143	-15.22	867	22	840	504
hsa-miR-451a	ENSG00000245526	ENST00000787108.1	LINC00461	143	-15.22	143	-15.22	868	22	629	294
hsa-miR-451a	ENSG00000245526	ENST00000787096.1	LINC00461	143	-15.22	143	-15.22	869	22	746	411
hsa-miR-451a	ENSG00000245526	ENST00000508885.7	LINC00461	143	-15.22	143	-15.22	870	22	826	491
hsa-miR-451a	ENSG00000245526	ENST00000506014.6	LINC00461	143	-15.22	143	-15.22	871	22	801	466
hsa-miR-451a	ENSG00000245526	ENST00000502301.6	LINC00461	143	-15.22	143	-15.22	872	22	785	450
hsa-miR-451a	ENSG00000245526	ENST00000787079.1	LINC00461	143	-15.22	143	-15.22	873	22	967	632
hsa-miR-451a	ENSG00000245526	ENST00000702076.2	LINC00461	143	-15.22	143	-15.22	874	22	736	401
hsa-miR-451a	ENSG00000245526	ENST00000509405.7	LINC00461	143	-15.22	143	-15.22	875	22	983	648
hsa-miR-451a	ENSG00000245526	ENST00000787113.1	LINC00461	143	-15.22	143	-15.22	876	22	1101	768
hsa-miR-451a	ENSG00000245526	ENST00000700760.1	LINC00461	143	-15.22	143	-15.22	877	22	620	287
hsa-miR-451a	ENSG00000245526	ENST00000692551.2	LINC00461	143	-15.22	143	-15.22	878	22	961	628
hsa-miR-451a	ENSG00000245526	ENST00000787084.1	LINC00461	143	-15.22	143	-15.22	879	22	923	590
hsa-miR-451a	ENSG00000245526	ENST00000787090.1	LINC00461	143	-15.22	143	-15.22	880	22	785	453
hsa-miR-451a	ENSG00000245526	ENST00000787077.1	LINC00461	143	-15.22	143	-15.22	881	22	839	508
hsa-miR-451a	ENSG00000245526	ENST00000787076.1	LINC00461	143	-15.22	143	-15.22	882	22	907	576
hsa-miR-451a	ENSG00000245526	ENST00000787086.1	LINC00461	143	-15.22	143	-15.22	883	22	853	523
hsa-miR-451a	ENSG00000245526	ENST00000787085.1	LINC00461	143	-15.22	143	-15.22	884	22	940	610
hsa-miR-451a	ENSG00000245526	ENST00000787080.1	LINC00461	143	-15.22	143	-15.22	885	22	888	558
hsa-miR-451a	ENSG00000245526	ENST00000787095.1	LINC00461	143	-15.22	143	-15.22	886	22	678	350
hsa-miR-451a	ENSG00000245526	ENST00000787088.1	LINC00461	143	-15.22	143	-15.22	887	22	1036	708
hsa-miR-451a	ENSG00000245526	ENST00000787074.1	LINC00461	143	-15.22	143	-15.22	888	22	780	452
hsa-miR-451a	ENSG00000245526	ENST00000787073.1	LINC00461	143	-15.22	143	-15.22	889	22	867	564
hsa-miR-451a	ENSG00000245526	ENST00000787082.1	LINC00461	143	-15.22	143	-15.22	890	22	707	585
hsa-miR-451a	ENSG00000245526	ENST00000787093.1	LINC00461	143	-15.22	143	-15.22	891	22	566	446
hsa-miR-451a	ENSG00000245526	ENST00000787091.1	LINC00461	143	-15.22	143	-15.22	892	22	949	829
hsa-miR-451a	ENSG00000245526	ENST00000787087.1	LINC00461	143	-15.22	143	-15.22	893	22	619	502
hsa-miR-451a	ENSG00000245526	ENST00000655936.2	LINC00461	145	-20.78	145	-20.78	925	22	2830	1206
hsa-miR-451a	ENSG00000245526	ENST00000652822.2	LINC00461	145	-20.78	145	-20.78	926	22	1108	223
hsa-miR-451a	ENSG00000279232	ENST00000639479.1	AC008522.1	142	-12.44	142	-12.44	933	22	2906	1078
hsa-miR-451a	ENSG00000279232	ENST00000624710.1	AC008522.1	142	-12.44	142	-12.44	934	22	2904	1078
hsa-miR-451a	ENSG00000280780	ENST00000702407.1	JAKMIP2-AS1	144	-16.37	144	-16.37	954	22	2990	1065
hsa-miR-451a	ENSG00000239775	ENST00000445938.1	AC017116.1	150	-13.59	150	-13.59	1045	22	708	545
hsa-miR-451a	ENSG00000239775	ENST00000425727.1	AC017116.1	150	-13.59	150	-13.59	1046	22	607	448
hsa-miR-451a	ENSG00000231764	ENST00000430027.3	DLX6-AS1	146	-21.46	146	-21.46	1049	22	15364	5030
hsa-miR-451a	ENSG00000231764	ENST00000659765.2	DLX6-AS1	146	-21.46	146	-21.46	1050	22	4722	4666
hsa-miR-451a	ENSG00000231764	ENST00000458352.5	DLX6-AS1	146	-21.46	146	-21.46	1051	22	5529	5504
hsa-miR-451a	ENSG00000254377	ENST00000772504.1	MIR124-2HG	140	-11.88	140	-11.88	1180	22	1050	895
hsa-miR-451a	ENSG00000254377	ENST00000671254.3	MIR124-2HG	140	-11.88	140	-11.88	1182	22	2168	1683
hsa-miR-451a	ENSG00000254377	ENST00000772506.1	MIR124-2HG	140	-11.88	140	-11.88	1183	22	1200	1053
hsa-miR-451a	ENSG00000254377	ENST00000701873.2	MIR124-2HG	140	-11.88	140	-11.88	1194	22	950	797
hsa-miR-451a	ENSG00000254377	ENST00000520799.5	MIR124-2HG	140	-11.88	140	-11.88	1197	22	1000	853
hsa-miR-451a	ENSG00000254377	ENST00000772508.1	MIR124-2HG	140	-11.88	140	-11.88	1198	22	966	811
hsa-miR-451a	ENSG00000254377	ENST00000772509.1	MIR124-2HG	140	-11.88	140	-11.88	1199	22	1083	928
hsa-miR-451a	ENSG00000254377	ENST00000772511.1	MIR124-2HG	140	-11.88	140	-11.88	1201	22	1398	1254
hsa-miR-451a	ENSG00000254377	ENST00000772512.1	MIR124-2HG	140	-11.88	140	-11.88	1203	22	938	791
hsa-miR-451a	ENSG00000254377	ENST00000689669.3	MIR124-2HG	140	-11.88	140	-11.88	1204	22	2421	1877
hsa-miR-451a	ENSG00000254377	ENST00000524060.2	MIR124-2HG	140	-11.88	140	-11.88	1206	22	1414	1259
hsa-miR-451a	ENSG00000254377	ENST00000524284.3	MIR124-2HG	140	-11.88	140	-11.88	1207	22	1459	1303
hsa-miR-451a	ENSG00000254377	ENST00000688418.1	MIR124-2HG	140	-11.88	140	-11.88	1208	22	1650	1503
hsa-miR-451a	ENSG00000254377	ENST00000690865.2	MIR124-2HG	140	-11.88	140	-11.88	1209	22	1621	1474
hsa-miR-451a	ENSG00000254377	ENST00000686827.2	MIR124-2HG	140	-11.88	140	-11.88	1211	22	1194	1047
hsa-miR-451a	ENSG00000254377	ENST00000702036.1	MIR124-2HG	140	-11.88	140	-11.88	1212	22	1146	999
hsa-miR-451a	ENSG00000254377	ENST00000772514.1	MIR124-2HG	140	-11.88	140	-11.88	1215	22	958	814
hsa-miR-451a	ENSG00000204802	ENST00000448491.1	AL590399.1	142	-17.31	142	-17.31	1289	22	495	67
hsa-miR-451a	ENSG00000255248	ENST00000524376.3	MIR100HG	145	-12.64	145	-12.64	1528	22	2745	2006
hsa-miR-451a	ENSG00000255248	ENST00000530072.7	MIR100HG	145	-12.64	145	-12.64	1529	22	3673	2934
hsa-miR-451a	ENSG00000255248	ENST00000531381.1	MIR100HG	145	-12.64	145	-12.64	1530	22	3370	2631
hsa-miR-451a	ENSG00000255248	ENST00000529823.3	MIR100HG	145	-12.64	145	-12.64	1531	22	3368	2629
hsa-miR-451a	ENSG00000255248	ENST00000654519.2	MIR100HG	145	-12.64	145	-12.64	1532	22	3393	2654
hsa-miR-451a	ENSG00000255248	ENST00000653167.2	MIR100HG	145	-12.64	145	-12.64	1533	22	3116	2377
hsa-miR-451a	ENSG00000255248	ENST00000658364.2	MIR100HG	145	-12.64	145	-12.64	1534	22	3163	2424
hsa-miR-451a	ENSG00000255248	ENST00000664908.2	MIR100HG	145	-12.64	145	-12.64	1535	22	3109	2370
hsa-miR-451a	ENSG00000255248	ENST00000668776.2	MIR100HG	145	-12.64	145	-12.64	1536	22	4383	3644
hsa-miR-451a	ENSG00000255248	ENST00000780377.1	MIR100HG	145	-12.64	145	-12.64	1537	22	3092	2353
hsa-miR-451a	ENSG00000255248	ENST00000532890.6	MIR100HG	145	-12.64	145	-12.64	1538	22	2973	2248
hsa-miR-451a	ENSG00000255248	ENST00000649216.1	MIR100HG	145	-12.64	145	-12.64	1539	22	3226	2505
hsa-miR-451a	ENSG00000255248	ENST00000528986.2	MIR100HG	145	-12.64	145	-12.64	1540	22	3514	2795
hsa-miR-451a	ENSG00000255248	ENST00000531071.6	MIR100HG	145	-12.64	145	-12.64	1541	22	3399	2680
hsa-miR-451a	ENSG00000255248	ENST00000665673.1	MIR100HG	145	-12.64	145	-12.64	1542	22	2811	2095
hsa-miR-451a	ENSG00000255248	ENST00000650497.2	MIR100HG	145	-12.64	145	-12.64	1543	22	3740	3042
hsa-miR-451a	ENSG00000255248	ENST00000662950.1	MIR100HG	145	-12.64	145	-12.64	1544	22	3043	2345
hsa-miR-451a	ENSG00000255248	ENST00000648209.1	MIR100HG	145	-12.64	145	-12.64	1545	22	2801	2145
hsa-miR-451a	ENSG00000255248	ENST00000648734.1	MIR100HG	145	-12.64	145	-12.64	1546	22	3137	2491
hsa-miR-451a	ENSG00000255248	ENST00000649293.1	MIR100HG	145	-12.64	145	-12.64	1547	22	2971	2325
hsa-miR-451a	ENSG00000255248	ENST00000670396.1	MIR100HG	145	-12.64	145	-12.64	1548	22	3004	2358
hsa-miR-451a	ENSG00000255248	ENST00000656793.2	MIR100HG	145	-12.64	145	-12.64	1549	22	2900	2278
hsa-miR-451a	ENSG00000255248	ENST00000663296.1	MIR100HG	145	-12.64	145	-12.64	1550	22	2848	2227
hsa-miR-451a	ENSG00000255248	ENST00000661848.1	MIR100HG	145	-12.64	145	-12.64	1551	22	3174	2554
hsa-miR-451a	ENSG00000255248	ENST00000655138.1	MIR100HG	145	-12.64	145	-12.64	1552	22	2867	2247
hsa-miR-451a	ENSG00000255248	ENST00000669472.1	MIR100HG	145	-12.64	145	-12.64	1553	22	2976	2366
hsa-miR-451a	ENSG00000255248	ENST00000660603.1	MIR100HG	145	-12.64	145	-12.64	1554	22	2766	2161
hsa-miR-451a	ENSG00000255248	ENST00000655814.1	MIR100HG	145	-12.64	145	-12.64	1555	22	2585	2555
hsa-miR-451a	ENSG00000255248	ENST00000780414.1	MIR100HG	148	-14.96	148	-14.96	1570	22	834	100
hsa-miR-451a	ENSG00000255248	ENST00000780416.1	MIR100HG	148	-14.96	148	-14.96	1572	22	1058	30
hsa-miR-451a	ENSG00000255248	ENST00000780415.1	MIR100HG	148	-14.96	148	-14.96	1573	22	890	63
hsa-miR-451a	ENSG00000255248	ENST00000780417.1	MIR100HG	148	-14.96	148	-14.96	1575	22	792	44
hsa-miR-451a	ENSG00000255248	ENST00000780507.1	MIR100HG	145	-13.19	145	-13.19	1611	22	625	466
hsa-miR-451a	ENSG00000255248	ENST00000780460.1	MIR100HG	148	-14.96	148	-14.96	1625	22	1030	88
hsa-miR-451a	ENSG00000255248	ENST00000780484.1	MIR100HG	148	-14.96	148	-14.96	1667	22	562	111
hsa-miR-451a	ENSG00000255248	ENST00000780496.1	MIR100HG	148	-14.96	148	-14.96	1668	22	787	58
hsa-miR-451a	ENSG00000255248	ENST00000780493.1	MIR100HG	148	-14.96	148	-14.96	1669	22	931	119
hsa-miR-451a	ENSG00000255248	ENST00000780494.1	MIR100HG	148	-14.96	148	-14.96	1670	22	850	111
hsa-miR-451a	ENSG00000255248	ENST00000780511.1	MIR100HG	148	-14.96	148	-14.96	1671	22	314	33
hsa-miR-451a	ENSG00000258325	ENST00000501371.5	ITFG2-AS1	141	-11.91	141	-11.91	1723	22	2191	1523
hsa-miR-451a	ENSG00000278743	ENST00000622671.3	AC087239.1	154	-9.99	154	-9.99	1758	22	1231	648
hsa-miR-451a	ENSG00000278743	ENST00000790877.1	AC087239.1	154	-9.99	154	-9.99	1759	22	551	400
hsa-miR-451a	ENSG00000278743	ENST00000790878.1	AC087239.1	154	-9.99	154	-9.99	1760	22	528	397
hsa-miR-451a	ENSG00000260944	ENST00000809053.1	FOXC2-AS1	149	-13.95	149	-13.95	2039	22	907	438
hsa-miR-451a	ENSG00000205181	ENST00000379053.5	LINC00654	142	-11.47	142	-11.47	2282	22	6118	5799
hsa-miR-451a	ENSG00000236384	ENST00000782644.1	LINC00479	147	-14.58	147	-14.58	2411	22	1208	843
hsa-miR-451a	ENSG00000236384	ENST00000782643.1	LINC00479	147	-14.58	147	-14.58	2412	22	1216	851
hsa-miR-451a	ENSG00000236384	ENST00000412102.5	LINC00479	147	-14.58	147	-14.58	2413	22	2033	1727
hsa-miR-451a	ENSG00000230107	ENST00000767208.1	AL022316.1	150	-15.1	150	-15.1	2486	22	915	283
hsa-miR-451a	ENSG00000230107	ENST00000767203.1	AL022316.1	150	-15.1	150	-15.1	2487	22	1063	55
hsa-miR-451a	ENSG00000230107	ENST00000767209.1	AL022316.1	150	-15.1	150	-15.1	2488	22	370	53
hsa-miR-451a	ENSG00000230107	ENST00000767204.1	AL022316.1	150	-15.1	150	-15.1	2489	22	1060	7
hsa-miR-215-5p	ENSG00000125462	ENST00000608007.1	C1orf61	292	-27.85	152	-15.22	2777	21	3138	2028
hsa-miR-215-5p	ENSG00000259439	ENST00000432125.3	LINC01833	154	-14.26	154	-14.26	2998	21	2755	2415
hsa-miR-215-5p	ENSG00000259439	ENST00000437916.2	LINC01833	154	-14.26	154	-14.26	3000	21	2880	2145
hsa-miR-215-5p	ENSG00000224509	ENST00000686966.2	AC010884.1	141	-15.35	141	-15.35	3028	21	1490	562
hsa-miR-215-5p	ENSG00000224509	ENST00000456519.3	AC010884.1	141	-15.35	141	-15.35	3029	21	1260	341
hsa-miR-215-5p	ENSG00000224509	ENST00000791104.1	AC010884.1	141	-15.35	141	-15.35	3030	21	1158	243
hsa-miR-215-5p	ENSG00000224509	ENST00000702648.2	AC010884.1	141	-15.35	141	-15.35	3031	21	1001	522
hsa-miR-215-5p	ENSG00000224509	ENST00000791125.1	AC010884.1	141	-15.35	141	-15.35	3032	21	837	361
hsa-miR-215-5p	ENSG00000224509	ENST00000702224.1	AC010884.1	141	-15.35	141	-15.35	3033	21	1530	1054
hsa-miR-215-5p	ENSG00000224509	ENST00000688299.3	AC010884.1	141	-15.35	141	-15.35	3034	21	1001	525
hsa-miR-215-5p	ENSG00000224509	ENST00000791118.1	AC010884.1	141	-15.35	141	-15.35	3035	21	652	176
hsa-miR-215-5p	ENSG00000224509	ENST00000791117.1	AC010884.1	141	-15.35	141	-15.35	3036	21	660	184
hsa-miR-215-5p	ENSG00000224509	ENST00000791116.1	AC010884.1	141	-15.35	141	-15.35	3037	21	686	210
hsa-miR-215-5p	ENSG00000224509	ENST00000791113.1	AC010884.1	141	-15.35	141	-15.35	3038	21	557	168
hsa-miR-215-5p	ENSG00000224509	ENST00000791112.1	AC010884.1	141	-15.35	141	-15.35	3039	21	770	294
hsa-miR-215-5p	ENSG00000224509	ENST00000791111.1	AC010884.1	141	-15.35	141	-15.35	3040	21	655	179
hsa-miR-215-5p	ENSG00000224509	ENST00000791108.1	AC010884.1	141	-15.35	141	-15.35	3041	21	942	466
hsa-miR-215-5p	ENSG00000224509	ENST00000791109.1	AC010884.1	141	-15.35	141	-15.35	3042	21	953	477
hsa-miR-215-5p	ENSG00000224509	ENST00000791107.1	AC010884.1	141	-15.35	141	-15.35	3043	21	706	230
hsa-miR-215-5p	ENSG00000224509	ENST00000791106.1	AC010884.1	141	-15.35	141	-15.35	3044	21	1126	650
hsa-miR-215-5p	ENSG00000224509	ENST00000791105.1	AC010884.1	141	-15.35	141	-15.35	3045	21	1138	662
hsa-miR-215-5p	ENSG00000224509	ENST00000791114.1	AC010884.1	141	-15.35	141	-15.35	3046	21	746	273
hsa-miR-215-5p	ENSG00000224509	ENST00000791110.1	AC010884.1	141	-15.35	141	-15.35	3047	21	947	474
hsa-miR-215-5p	ENSG00000224509	ENST00000791121.1	AC010884.1	141	-15.35	141	-15.35	3048	21	1021	594
hsa-miR-215-5p	ENSG00000224509	ENST00000702890.1	AC010884.1	141	-15.35	141	-15.35	3049	21	932	505
hsa-miR-215-5p	ENSG00000224509	ENST00000691276.1	AC010884.1	141	-15.35	141	-15.35	3050	21	970	543
hsa-miR-215-5p	ENSG00000224509	ENST00000791115.1	AC010884.1	141	-15.35	141	-15.35	3051	21	1118	691
hsa-miR-215-5p	ENSG00000224509	ENST00000791122.1	AC010884.1	141	-15.35	141	-15.35	3052	21	898	474
hsa-miR-215-5p	ENSG00000224509	ENST00000791119.1	AC010884.1	141	-15.35	141	-15.35	3053	21	865	535
hsa-miR-215-5p	ENSG00000224509	ENST00000791124.1	AC010884.1	141	-15.35	141	-15.35	3054	21	550	388
hsa-miR-215-5p	ENSG00000224509	ENST00000791123.1	AC010884.1	141	-15.35	141	-15.35	3055	21	394	232
hsa-miR-215-5p	ENSG00000272994	ENST00000610036.2	AC012360.3	142	-16.63	142	-16.63	3060	21	3575	1935
hsa-miR-215-5p	ENSG00000228857	ENST00000689404.2	AC104653.1	146	-14.34	146	-14.34	3068	21	1401	1012
hsa-miR-215-5p	ENSG00000228857	ENST00000827863.1	AC104653.1	146	-14.34	146	-14.34	3069	21	1691	1302
hsa-miR-215-5p	ENSG00000226806	ENST00000437007.2	AC011893.1	140	-15.8	140	-15.8	3107	21	1870	1141
hsa-miR-215-5p	ENSG00000246090	ENST00000757801.1	AP002026.1	140	-15.55	140	-15.55	3167	21	1603	222
hsa-miR-215-5p	ENSG00000246090	ENST00000670724.2	AP002026.1	140	-15.55	140	-15.55	3171	21	1511	555
hsa-miR-215-5p	ENSG00000246090	ENST00000757809.1	AP002026.1	140	-15.55	140	-15.55	3180	21	1099	524
hsa-miR-215-5p	ENSG00000246090	ENST00000757799.1	AP002026.1	140	-15.55	140	-15.55	3184	21	2240	512
hsa-miR-215-5p	ENSG00000246090	ENST00000500358.6	AP002026.1	140	-15.55	140	-15.55	3192	21	4825	503
hsa-miR-215-5p	ENSG00000246090	ENST00000757829.1	AP002026.1	140	-15.55	140	-15.55	3193	21	1628	500
hsa-miR-215-5p	ENSG00000246090	ENST00000661393.1	AP002026.1	140	-15.55	140	-15.55	3194	21	1910	500
hsa-miR-215-5p	ENSG00000246090	ENST00000757805.1	AP002026.1	140	-15.55	140	-15.55	3196	21	1296	492
hsa-miR-215-5p	ENSG00000246090	ENST00000757806.1	AP002026.1	140	-15.55	140	-15.55	3197	21	1498	492
hsa-miR-215-5p	ENSG00000246090	ENST00000757802.1	AP002026.1	140	-15.55	140	-15.55	3203	21	2169	483
hsa-miR-215-5p	ENSG00000246090	ENST00000757800.1	AP002026.1	140	-15.55	140	-15.55	3213	21	1321	134
hsa-miR-215-5p	ENSG00000246090	ENST00000510764.1	AP002026.1	145	-16.07	145	-16.07	3237	21	387	144
hsa-miR-215-5p	ENSG00000177822	ENST00000763520.1	AC098864.1	158	-13.54	158	-13.54	3294	21	947	926
hsa-miR-215-5p	ENSG00000245526	ENST00000506041.2	LINC00461	141	-13.34	141	-13.34	3368	21	1626	1194
hsa-miR-215-5p	ENSG00000245526	ENST00000669424.1	LINC00461	327	-34.85	169	-21.58	3381	21	8262	1305
hsa-miR-215-5p	ENSG00000245526	ENST00000670494.2	LINC00461	327	-34.85	169	-21.58	3382	21	7579	688
hsa-miR-215-5p	ENSG00000245526	ENST00000664240.2	LINC00461	169	-21.58	169	-21.58	3383	21	6250	791
hsa-miR-215-5p	ENSG00000245526	ENST00000662060.1	LINC00461	169	-21.58	169	-21.58	3384	21	5116	638
hsa-miR-215-5p	ENSG00000245526	ENST00000665062.2	LINC00461	169	-21.58	169	-21.58	3385	21	4332	781
hsa-miR-215-5p	ENSG00000245526	ENST00000665865.2	LINC00461	169	-21.58	169	-21.58	3386	21	4522	976
hsa-miR-215-5p	ENSG00000245526	ENST00000668089.2	LINC00461	169	-21.58	169	-21.58	3387	21	2012	583
hsa-miR-215-5p	ENSG00000245526	ENST00000656755.2	LINC00461	169	-21.58	169	-21.58	3388	21	2074	700
hsa-miR-215-5p	ENSG00000245526	ENST00000659156.2	LINC00461	169	-21.58	169	-21.58	3389	21	2239	865
hsa-miR-215-5p	ENSG00000245526	ENST00000666297.2	LINC00461	169	-21.58	169	-21.58	3390	21	1825	655
hsa-miR-215-5p	ENSG00000245526	ENST00000701425.2	LINC00461	169	-21.58	169	-21.58	3391	21	945	602
hsa-miR-215-5p	ENSG00000245526	ENST00000689967.2	LINC00461	169	-21.58	169	-21.58	3392	21	884	541
hsa-miR-215-5p	ENSG00000245526	ENST00000506664.8	LINC00461	169	-21.58	169	-21.58	3393	21	813	473
hsa-miR-215-5p	ENSG00000245526	ENST00000701556.2	LINC00461	169	-21.58	169	-21.58	3394	21	822	532
hsa-miR-215-5p	ENSG00000245526	ENST00000787089.1	LINC00461	169	-21.58	169	-21.58	3395	21	1164	874
hsa-miR-215-5p	ENSG00000245526	ENST00000513805.7	LINC00461	169	-21.58	169	-21.58	3396	21	890	600
hsa-miR-215-5p	ENSG00000245526	ENST00000787083.1	LINC00461	169	-21.58	169	-21.58	3397	21	672	382
hsa-miR-215-5p	ENSG00000245526	ENST00000687262.2	LINC00461	169	-21.58	169	-21.58	3398	21	896	606
hsa-miR-215-5p	ENSG00000245526	ENST00000787081.1	LINC00461	169	-21.58	169	-21.58	3399	21	833	543
hsa-miR-215-5p	ENSG00000245526	ENST00000787075.1	LINC00461	169	-21.58	169	-21.58	3400	21	957	667
hsa-miR-215-5p	ENSG00000245526	ENST00000787072.1	LINC00461	169	-21.58	169	-21.58	3401	21	975	685
hsa-miR-215-5p	ENSG00000245526	ENST00000787078.1	LINC00461	169	-21.58	169	-21.58	3402	21	939	651
hsa-miR-215-5p	ENSG00000245526	ENST00000787092.1	LINC00461	169	-21.58	169	-21.58	3403	21	840	555
hsa-miR-215-5p	ENSG00000245526	ENST00000787108.1	LINC00461	169	-21.58	169	-21.58	3404	21	629	345
hsa-miR-215-5p	ENSG00000245526	ENST00000787096.1	LINC00461	169	-21.58	169	-21.58	3405	21	746	462
hsa-miR-215-5p	ENSG00000245526	ENST00000508885.7	LINC00461	169	-21.58	169	-21.58	3406	21	826	542
hsa-miR-215-5p	ENSG00000245526	ENST00000506014.6	LINC00461	169	-21.58	169	-21.58	3407	21	801	517
hsa-miR-215-5p	ENSG00000245526	ENST00000502301.6	LINC00461	169	-21.58	169	-21.58	3408	21	785	501
hsa-miR-215-5p	ENSG00000245526	ENST00000787079.1	LINC00461	169	-21.58	169	-21.58	3409	21	967	683
hsa-miR-215-5p	ENSG00000245526	ENST00000702076.2	LINC00461	169	-21.58	169	-21.58	3410	21	736	452
hsa-miR-215-5p	ENSG00000245526	ENST00000509405.7	LINC00461	169	-21.58	169	-21.58	3411	21	983	699
hsa-miR-215-5p	ENSG00000245526	ENST00000787113.1	LINC00461	169	-21.58	169	-21.58	3412	21	1101	819
hsa-miR-215-5p	ENSG00000245526	ENST00000700760.1	LINC00461	169	-21.58	169	-21.58	3413	21	620	338
hsa-miR-215-5p	ENSG00000245526	ENST00000692551.2	LINC00461	169	-21.58	169	-21.58	3414	21	961	679
hsa-miR-215-5p	ENSG00000245526	ENST00000787084.1	LINC00461	169	-21.58	169	-21.58	3415	21	923	641
hsa-miR-215-5p	ENSG00000245526	ENST00000787090.1	LINC00461	169	-21.58	169	-21.58	3416	21	785	504
hsa-miR-215-5p	ENSG00000245526	ENST00000787077.1	LINC00461	169	-21.58	169	-21.58	3417	21	839	559
hsa-miR-215-5p	ENSG00000245526	ENST00000787076.1	LINC00461	169	-21.58	169	-21.58	3418	21	907	627
hsa-miR-215-5p	ENSG00000245526	ENST00000787086.1	LINC00461	169	-21.58	169	-21.58	3419	21	853	574
hsa-miR-215-5p	ENSG00000245526	ENST00000787085.1	LINC00461	169	-21.58	169	-21.58	3420	21	940	661
hsa-miR-215-5p	ENSG00000245526	ENST00000787080.1	LINC00461	169	-21.58	169	-21.58	3421	21	888	609
hsa-miR-215-5p	ENSG00000245526	ENST00000787095.1	LINC00461	169	-21.58	169	-21.58	3422	21	678	401
hsa-miR-215-5p	ENSG00000245526	ENST00000787088.1	LINC00461	169	-21.58	169	-21.58	3423	21	1036	759
hsa-miR-215-5p	ENSG00000245526	ENST00000787074.1	LINC00461	169	-21.58	169	-21.58	3424	21	780	503
hsa-miR-215-5p	ENSG00000245526	ENST00000787073.1	LINC00461	169	-21.58	169	-21.58	3425	21	867	615
hsa-miR-215-5p	ENSG00000245526	ENST00000787082.1	LINC00461	169	-21.58	169	-21.58	3426	21	707	636
hsa-miR-215-5p	ENSG00000245526	ENST00000787093.1	LINC00461	169	-21.58	169	-21.58	3427	21	566	497
hsa-miR-215-5p	ENSG00000245526	ENST00000787091.1	LINC00461	169	-21.58	169	-21.58	3428	21	949	880
hsa-miR-215-5p	ENSG00000245526	ENST00000787087.1	LINC00461	169	-21.58	169	-21.58	3429	21	619	553
hsa-miR-215-5p	ENSG00000272540	ENST00000607476.1	AL662797.1	154	-21.34	154	-21.34	3500	21	773	203
hsa-miR-215-5p	ENSG00000231764	ENST00000430027.3	DLX6-AS1	290	-30.23	145	-17.04	3585	21	15364	2956
hsa-miR-215-5p	ENSG00000231764	ENST00000659765.2	DLX6-AS1	145	-13.19	145	-13.19	3586	21	4722	2592
hsa-miR-215-5p	ENSG00000231764	ENST00000458352.5	DLX6-AS1	145	-13.19	145	-13.19	3587	21	5529	3430
hsa-miR-215-5p	ENSG00000231764	ENST00000656954.2	DLX6-AS1	145	-13.19	145	-13.19	3588	21	4413	2415
hsa-miR-215-5p	ENSG00000231764	ENST00000605417.6	DLX6-AS1	145	-13.19	145	-13.19	3589	21	3995	2150
hsa-miR-215-5p	ENSG00000231764	ENST00000841667.1	DLX6-AS1	145	-13.19	145	-13.19	3593	21	2487	1732
hsa-miR-215-5p	ENSG00000231764	ENST00000658043.1	DLX6-AS1	145	-13.19	145	-13.19	3596	21	3119	2417
hsa-miR-215-5p	ENSG00000231764	ENST00000654988.1	DLX6-AS1	145	-13.19	145	-13.19	3597	21	3001	2299
hsa-miR-215-5p	ENSG00000231764	ENST00000685183.2	DLX6-AS1	293	-27.51	148	-13.78	3620	21	3802	2705
hsa-miR-215-5p	ENSG00000231764	ENST00000841697.1	DLX6-AS1	148	-13.73	148	-13.73	3621	21	1562	1084
hsa-miR-215-5p	ENSG00000260947	ENST00000566968.1	AL356489.2	154	-18.54	154	-18.54	3764	21	3528	529
hsa-miR-215-5p	ENSG00000284116	ENST00000809242.1	AL772307.1	143	-16.96	143	-16.96	3776	21	1414	625
hsa-miR-215-5p	ENSG00000284116	ENST00000809241.1	AL772307.1	143	-16.96	143	-16.96	3777	21	1326	558
hsa-miR-215-5p	ENSG00000236154	ENST00000428753.2	AL450311.2	142	-12.87	142	-12.87	3916	21	1377	480
hsa-miR-215-5p	ENSG00000236154	ENST00000839710.1	AL450311.2	142	-12.87	142	-12.87	3919	21	2216	463
hsa-miR-215-5p	ENSG00000236154	ENST00000839713.1	AL450311.2	142	-12.87	142	-12.87	3924	21	1342	446
hsa-miR-215-5p	ENSG00000256690	ENST00000741088.1	AP001160.1	146	-11.48	146	-11.48	3983	21	1375	1031
hsa-miR-215-5p	ENSG00000255248	ENST00000656682.1	MIR100HG	305	-29.73	158	-17.72	4059	21	4534	3120
hsa-miR-215-5p	ENSG00000255248	ENST00000659296.1	MIR100HG	158	-12.01	158	-12.01	4060	21	4175	3158
hsa-miR-215-5p	ENSG00000255248	ENST00000780480.1	MIR100HG	147	-11.9	147	-11.9	4121	21	703	467
hsa-miR-215-5p	ENSG00000255248	ENST00000780406.1	MIR100HG	151	-12.41	151	-12.41	4137	21	2023	1521
hsa-miR-215-5p	ENSG00000255248	ENST00000532350.6	MIR100HG	151	-12.41	151	-12.41	4138	21	1820	1351
hsa-miR-215-5p	ENSG00000255248	ENST00000670374.2	MIR100HG	150	-12.93	150	-12.93	4245	21	1242	541
hsa-miR-215-5p	ENSG00000255248	ENST00000669993.2	MIR100HG	293	-23.03	147	-13.47	4248	21	1326	877
hsa-miR-215-5p	ENSG00000247970	ENST00000502101.4	AL160313.1	142	-14.82	142	-14.82	4441	21	1107	461
hsa-miR-215-5p	ENSG00000255571	ENST00000536780.6	MIR9-3HG	143	-23.1	143	-23.1	4466	21	4778	4017
hsa-miR-215-5p	ENSG00000255571	ENST00000654171.1	MIR9-3HG	143	-23.1	143	-23.1	4467	21	4350	3591
hsa-miR-215-5p	ENSG00000255571	ENST00000657897.1	MIR9-3HG	143	-23.1	143	-23.1	4469	21	4308	3550
hsa-miR-215-5p	ENSG00000255571	ENST00000661040.1	MIR9-3HG	143	-23.1	143	-23.1	4470	21	4092	3334
hsa-miR-215-5p	ENSG00000255571	ENST00000654184.1	MIR9-3HG	143	-23.1	143	-23.1	4471	21	4201	3442
hsa-miR-215-5p	ENSG00000255571	ENST00000658194.1	MIR9-3HG	143	-23.1	143	-23.1	4472	21	4266	3508
hsa-miR-215-5p	ENSG00000255571	ENST00000661036.1	MIR9-3HG	143	-23.1	143	-23.1	4473	21	4225	3467
hsa-miR-215-5p	ENSG00000255571	ENST00000659235.1	MIR9-3HG	143	-23.1	143	-23.1	4474	21	4269	3511
hsa-miR-215-5p	ENSG00000255571	ENST00000669499.1	MIR9-3HG	143	-23.1	143	-23.1	4475	21	3818	3060
hsa-miR-215-5p	ENSG00000255571	ENST00000654079.1	MIR9-3HG	143	-23.1	143	-23.1	4476	21	4019	3261
hsa-miR-215-5p	ENSG00000255571	ENST00000670779.1	MIR9-3HG	143	-23.1	143	-23.1	4477	21	3960	3199
hsa-miR-215-5p	ENSG00000255571	ENST00000658764.1	MIR9-3HG	143	-23.1	143	-23.1	4478	21	4175	3417
hsa-miR-215-5p	ENSG00000255571	ENST00000666816.1	MIR9-3HG	143	-23.1	143	-23.1	4486	21	4053	3295
hsa-miR-215-5p	ENSG00000255571	ENST00000658770.1	MIR9-3HG	143	-23.1	143	-23.1	4487	21	3971	3213
hsa-miR-215-5p	ENSG00000255571	ENST00000669098.1	MIR9-3HG	143	-23.1	143	-23.1	4498	21	5427	4669
hsa-miR-215-5p	ENSG00000255571	ENST00000671075.1	MIR9-3HG	143	-23.1	143	-23.1	4517	21	5094	4336
hsa-miR-215-5p	ENSG00000255571	ENST00000663717.1	MIR9-3HG	143	-23.1	143	-23.1	4518	21	5607	4849
hsa-miR-215-5p	ENSG00000255571	ENST00000671447.1	MIR9-3HG	143	-23.1	143	-23.1	4519	21	4989	4231
hsa-miR-215-5p	ENSG00000213599	ENST00000568997.5	SLX1A-SULT1A3	142	-11.6	142	-11.6	4560	21	2834	131
hsa-miR-215-5p	ENSG00000237767	ENST00000665038.2	LINC01370	140	-11.94	140	-11.94	4879	21	2084	1111
hsa-miR-215-5p	ENSG00000237767	ENST00000722243.1	LINC01370	140	-11.94	140	-11.94	4881	21	1718	755
hsa-miR-215-5p	ENSG00000237767	ENST00000423153.2	LINC01370	141	-17.39	141	-17.39	4884	21	1324	697
hsa-miR-215-5p	ENSG00000237767	ENST00000722244.1	LINC01370	140	-11.94	140	-11.94	4888	21	1611	638
hsa-miR-215-5p	ENSG00000237767	ENST00000656861.2	LINC01370	140	-11.94	140	-11.94	4892	21	1544	571
hsa-miR-215-5p	ENSG00000237767	ENST00000722245.1	LINC01370	140	-11.94	140	-11.94	4893	21	1934	961
hsa-miR-215-5p	ENSG00000237767	ENST00000668047.2	LINC01370	140	-11.94	140	-11.94	4896	21	1645	672
hsa-miR-215-5p	ENSG00000237767	ENST00000722240.1	LINC01370	141	-17.39	141	-17.39	4897	21	943	549
hsa-miR-215-5p	ENSG00000237767	ENST00000722246.1	LINC01370	140	-11.94	140	-11.94	4900	21	1736	763
hsa-miR-215-5p	ENSG00000237767	ENST00000722247.1	LINC01370	140	-11.94	140	-11.94	4904	21	1306	333
hsa-miR-215-5p	ENSG00000174403	ENST00000788155.1	MIR1-1HG-AS1	146	-20.78	146	-20.78	4922	21	858	319
hsa-miR-215-5p	ENSG00000174403	ENST00000788164.1	MIR1-1HG-AS1	146	-20.78	146	-20.78	4924	21	965	460
hsa-miR-215-5p	ENSG00000174403	ENST00000788160.1	MIR1-1HG-AS1	146	-20.78	146	-20.78	4928	21	967	462
hsa-miR-215-5p	ENSG00000174403	ENST00000788159.1	MIR1-1HG-AS1	146	-20.78	146	-20.78	4932	21	921	418
hsa-miR-215-5p	ENSG00000279094	ENST00000743697.1	LINC01670	141	-17.56	141	-17.56	4935	21	570	107
hsa-miR-215-5p	ENSG00000279094	ENST00000743700.1	LINC01670	141	-17.56	141	-17.56	4936	21	1057	67
hsa-miR-215-5p	ENSG00000279094	ENST00000743699.1	LINC01670	141	-17.56	141	-17.56	4937	21	1243	98
hsa-miR-215-5p	ENSG00000279094	ENST00000743698.1	LINC01670	141	-17.56	141	-17.56	4938	21	1105	149
hsa-miR-215-5p	ENSG00000279094	ENST00000624261.2	LINC01670	141	-17.56	141	-17.56	4939	21	1127	160
hsa-miR-215-5p	ENSG00000279094	ENST00000623227.2	LINC01670	141	-17.56	141	-17.56	4940	21	1324	168
hsa-miR-215-5p	ENSG00000279094	ENST00000743702.1	LINC01670	141	-17.56	141	-17.56	4941	21	972	116
hsa-miR-215-5p	ENSG00000279094	ENST00000743701.1	LINC01670	141	-17.56	141	-17.56	4942	21	1035	151
hsa-miR-215-5p	ENSG00000279094	ENST00000624859.4	LINC01670	141	-17.56	141	-17.56	4943	21	1078	159
hsa-miR-215-5p	ENSG00000279094	ENST00000743704.1	LINC01670	141	-17.56	141	-17.56	4944	21	924	57
hsa-miR-215-5p	ENSG00000279094	ENST00000743703.1	LINC01670	141	-17.56	141	-17.56	4945	21	970	114
hsa-miR-215-5p	ENSG00000225783	ENST00000643270.1	MIAT	157	-16.56	157	-16.56	4966	21	3760	1424
hsa-miR-215-5p	ENSG00000225783	ENST00000450203.6	MIAT	157	-16.56	157	-16.56	4972	21	2290	895
hsa-miR-215-5p	ENSG00000225783	ENST00000436238.6	MIAT	157	-16.56	157	-16.56	4977	21	1236	912
hsa-miR-215-5p	ENSG00000225783	ENST00000452429.6	MIAT	157	-16.56	157	-16.56	4979	21	1852	1154
hsa-miR-215-5p	ENSG00000225783	ENST00000616469.4	MIAT	157	-16.56	157	-16.56	4987	21	10069	1039
hsa-miR-215-5p	ENSG00000225783	ENST00000717211.1	MIAT	157	-16.56	157	-16.56	4992	21	4185	914
hsa-miR-215-5p	ENSG00000225783	ENST00000613780.4	MIAT	157	-16.56	157	-16.56	4993	21	10143	987
hsa-miR-215-5p	ENSG00000225783	ENST00000616213.4	MIAT	157	-16.56	157	-16.56	4994	21	9943	913
hsa-miR-215-5p	ENSG00000225783	ENST00000717188.1	MIAT	157	-16.56	157	-16.56	4998	21	2322	957
hsa-miR-215-5p	ENSG00000225783	ENST00000717190.1	MIAT	157	-16.56	157	-16.56	5000	21	1226	1002
hsa-miR-215-5p	ENSG00000225783	ENST00000458302.6	MIAT	157	-16.56	157	-16.56	5001	21	2875	963
hsa-miR-215-5p	ENSG00000225783	ENST00000717200.1	MIAT	157	-16.56	157	-16.56	5002	21	1963	845
hsa-miR-215-5p	ENSG00000225783	ENST00000717191.1	MIAT	157	-16.56	157	-16.56	5003	21	2206	845
hsa-miR-215-5p	ENSG00000225783	ENST00000453023.2	MIAT	157	-16.56	157	-16.56	5004	21	3225	1030
hsa-miR-215-5p	ENSG00000225783	ENST00000717201.1	MIAT	157	-16.56	157	-16.56	5005	21	4016	845
hsa-miR-215-5p	ENSG00000225783	ENST00000620145.6	MIAT	157	-16.56	157	-16.56	5006	21	10004	845
hsa-miR-215-5p	ENSG00000225783	ENST00000665574.1	MIAT	157	-16.56	157	-16.56	5009	21	4019	865
hsa-miR-215-3p	ENSG00000225880	ENST00000419394.2	LINC00115	284	-31.98	144	-17.37	5073	23	491	423
hsa-miR-215-3p	ENSG00000225880	ENST00000635509.2	LINC00115	140	-17.37	140	-17.37	5074	23	941	279
hsa-miR-215-3p	ENSG00000225880	ENST00000648019.1	LINC00115	155	-26.58	155	-26.58	5076	23	1216	246
hsa-miR-215-3p	ENSG00000225880	ENST00000441245.5	LINC00115	144	-14.61	144	-14.61	5079	23	629	167
hsa-miR-215-3p	ENSG00000225880	ENST00000743821.1	LINC00115	140	-17.37	140	-17.37	5080	23	2153	1010
hsa-miR-215-3p	ENSG00000225880	ENST00000743822.1	LINC00115	140	-17.37	140	-17.37	5081	23	1641	502
hsa-miR-215-3p	ENSG00000225880	ENST00000745228.1	LINC00115	140	-17.37	140	-17.37	5082	23	669	422
hsa-miR-215-3p	ENSG00000225880	ENST00000745227.1	LINC00115	295	-43.95	155	-26.58	5083	23	684	246
hsa-miR-215-3p	ENSG00000225880	ENST00000414688.6	LINC00115	155	-26.58	155	-26.58	5084	23	421	167
hsa-miR-215-3p	ENSG00000225880	ENST00000506640.4	LINC00115	295	-38.58	148	-22.68	5087	23	6494	909
hsa-miR-215-3p	ENSG00000225880	ENST00000743824.1	LINC00115	148	-15.9	148	-15.9	5090	23	1182	578
hsa-miR-215-3p	ENSG00000225880	ENST00000743823.1	LINC00115	148	-15.9	148	-15.9	5091	23	1292	688
hsa-miR-215-3p	ENSG00000225880	ENST00000743865.1	LINC00115	148	-15.9	148	-15.9	5092	23	1125	627
hsa-miR-215-3p	ENSG00000225880	ENST00000743825.1	LINC00115	288	-32.53	148	-16.63	5093	23	1470	1107
hsa-miR-215-3p	ENSG00000225880	ENST00000743835.1	LINC00115	288	-32.53	148	-16.63	5094	23	1684	1436
hsa-miR-215-3p	ENSG00000225880	ENST00000743826.1	LINC00115	288	-32.53	148	-16.63	5095	23	1113	1034
hsa-miR-215-3p	ENSG00000225880	ENST00000743828.1	LINC00115	140	-16.63	140	-16.63	5099	23	672	123
hsa-miR-215-3p	ENSG00000225880	ENST00000743830.1	LINC00115	140	-16.63	140	-16.63	5100	23	623	121
hsa-miR-215-3p	ENSG00000225880	ENST00000743829.1	LINC00115	140	-16.63	140	-16.63	5101	23	575	123
hsa-miR-215-3p	ENSG00000225880	ENST00000743833.1	LINC00115	140	-16.63	140	-16.63	5103	23	1183	589
hsa-miR-215-3p	ENSG00000225880	ENST00000743832.1	LINC00115	140	-16.63	140	-16.63	5104	23	872	279
hsa-miR-215-3p	ENSG00000225880	ENST00000743834.1	LINC00115	140	-16.63	140	-16.63	5110	23	861	112
hsa-miR-215-3p	ENSG00000225880	ENST00000744077.1	LINC00115	140	-16.63	140	-16.63	5114	23	1465	979
hsa-miR-215-3p	ENSG00000225880	ENST00000743839.1	LINC00115	140	-16.63	140	-16.63	5115	23	781	298
hsa-miR-215-3p	ENSG00000225880	ENST00000743840.1	LINC00115	140	-16.63	140	-16.63	5117	23	551	128
hsa-miR-215-3p	ENSG00000225880	ENST00000743837.1	LINC00115	140	-16.63	140	-16.63	5118	23	675	202
hsa-miR-215-3p	ENSG00000225880	ENST00000743864.1	LINC00115	140	-16.63	140	-16.63	5120	23	447	72
hsa-miR-215-3p	ENSG00000225880	ENST00000743843.1	LINC00115	140	-16.63	140	-16.63	5121	23	689	111
hsa-miR-215-3p	ENSG00000225880	ENST00000743838.1	LINC00115	140	-16.63	140	-16.63	5122	23	615	197
hsa-miR-215-3p	ENSG00000225880	ENST00000743836.1	LINC00115	140	-16.63	140	-16.63	5123	23	714	389
hsa-miR-215-3p	ENSG00000225880	ENST00000743850.1	LINC00115	140	-16.63	140	-16.63	5124	23	971	114
hsa-miR-215-3p	ENSG00000225880	ENST00000743848.1	LINC00115	140	-16.63	140	-16.63	5126	23	1033	123
hsa-miR-215-3p	ENSG00000225880	ENST00000743847.1	LINC00115	140	-16.63	140	-16.63	5127	23	1036	129
hsa-miR-215-3p	ENSG00000225880	ENST00000447500.5	LINC00115	140	-16.63	140	-16.63	5129	23	2007	1102
hsa-miR-215-3p	ENSG00000225880	ENST00000743845.1	LINC00115	140	-16.63	140	-16.63	5130	23	1303	401
hsa-miR-215-3p	ENSG00000225880	ENST00000743844.1	LINC00115	140	-16.63	140	-16.63	5131	23	1326	421
hsa-miR-215-3p	ENSG00000225880	ENST00000744079.1	LINC00115	140	-16.63	140	-16.63	5134	23	1653	989
hsa-miR-215-3p	ENSG00000225880	ENST00000743868.1	LINC00115	140	-16.63	140	-16.63	5135	23	563	72
hsa-miR-215-3p	ENSG00000225880	ENST00000744083.1	LINC00115	140	-16.63	140	-16.63	5136	23	1333	874
hsa-miR-215-3p	ENSG00000225880	ENST00000743855.1	LINC00115	140	-16.63	140	-16.63	5137	23	507	95
hsa-miR-215-3p	ENSG00000225880	ENST00000743854.1	LINC00115	140	-16.63	140	-16.63	5138	23	680	111
hsa-miR-215-3p	ENSG00000225880	ENST00000743851.1	LINC00115	140	-16.63	140	-16.63	5139	23	867	405
hsa-miR-215-3p	ENSG00000225880	ENST00000743856.1	LINC00115	140	-16.63	140	-16.63	5140	23	603	111
hsa-miR-215-3p	ENSG00000225880	ENST00000744078.1	LINC00115	140	-16.63	140	-16.63	5142	23	1748	937
hsa-miR-215-3p	ENSG00000225880	ENST00000743859.1	LINC00115	140	-16.63	140	-16.63	5143	23	743	95
hsa-miR-215-3p	ENSG00000225880	ENST00000743875.1	LINC00115	140	-16.63	140	-16.63	5144	23	348	72
hsa-miR-215-3p	ENSG00000225880	ENST00000744082.1	LINC00115	140	-16.63	140	-16.63	5146	23	1285	927
hsa-miR-215-3p	ENSG00000225880	ENST00000743862.1	LINC00115	140	-16.63	140	-16.63	5147	23	309	128
hsa-miR-215-3p	ENSG00000225880	ENST00000744087.1	LINC00115	140	-16.63	140	-16.63	5148	23	1078	898
hsa-miR-215-3p	ENSG00000225880	ENST00000743863.1	LINC00115	140	-16.63	140	-16.63	5149	23	1734	111
hsa-miR-215-3p	ENSG00000225880	ENST00000743861.1	LINC00115	140	-16.63	140	-16.63	5150	23	574	394
hsa-miR-215-3p	ENSG00000225880	ENST00000473798.3	LINC00115	148	-14.85	148	-14.85	5159	23	3602	3012
hsa-miR-215-3p	ENSG00000272449	ENST00000606645.4	AL139246.5	147	-16.38	147	-16.38	5169	23	1590	1508
hsa-miR-215-3p	ENSG00000272145	ENST00000606277.2	NFYC-AS1	141	-8.7	141	-8.7	5213	23	1695	1260
hsa-miR-215-3p	ENSG00000116652	ENST00000371086.3	DLEU2L	140	-18.78	140	-18.78	5217	23	3555	2142
hsa-miR-215-3p	ENSG00000116652	ENST00000771855.1	DLEU2L	140	-18.78	140	-18.78	5218	23	496	261
hsa-miR-215-3p	ENSG00000283999	ENST00000774497.1	AL358215.3	153	-18.59	153	-18.59	5241	23	661	104
hsa-miR-215-3p	ENSG00000273483	ENST00000608357.1	AL354760.1	161	-18.72	161	-18.72	5243	23	643	13
hsa-miR-215-3p	ENSG00000231064	ENST00000730287.1	AC234582.1	141	-16.07	141	-16.07	5284	23	1038	872
hsa-miR-215-3p	ENSG00000125462	ENST00000608007.1	C1orf61	142	-17.25	142	-17.25	5313	23	3138	1574
hsa-miR-215-3p	ENSG00000125462	ENST00000758352.1	C1orf61	140	-10.81	140	-10.81	5384	23	583	1
hsa-miR-215-3p	ENSG00000125462	ENST00000462458.6	C1orf61	142	-17.25	142	-17.25	5385	23	1989	1074
hsa-miR-215-3p	ENSG00000125462	ENST00000488498.2	C1orf61	141	-16.79	141	-16.79	5447	23	4774	469
hsa-miR-215-3p	ENSG00000234425	ENST00000446952.2	AL138930.1	167	-24.23	167	-24.23	5504	23	664	140
hsa-miR-215-3p	ENSG00000234425	ENST00000846349.1	AL138930.1	157	-18.63	157	-18.63	5505	23	341	142
hsa-miR-215-3p	ENSG00000234425	ENST00000846350.1	AL138930.1	162	-23.05	162	-23.05	5506	23	455	250
hsa-miR-215-3p	ENSG00000224717	ENST00000442318.1	AC098936.1	146	-20.96	146	-20.96	5510	23	2885	1023
hsa-miR-215-3p	ENSG00000273106	ENST00000727114.1	AC019129.2	142	-14.68	142	-14.68	5521	23	283	12
hsa-miR-215-3p	ENSG00000273106	ENST00000727115.1	AC019129.2	142	-14.68	142	-14.68	5522	23	300	12
hsa-miR-215-3p	ENSG00000273106	ENST00000727116.1	AC019129.2	300	-31.82	158	-17.14	5523	23	310	151
hsa-miR-215-3p	ENSG00000273106	ENST00000727117.1	AC019129.2	156	-15.82	156	-15.82	5524	23	262	108
hsa-miR-215-3p	ENSG00000273106	ENST00000727111.1	AC019129.2	142	-14.68	142	-14.68	5525	23	604	31
hsa-miR-215-3p	ENSG00000273106	ENST00000727110.1	AC019129.2	142	-14.68	142	-14.68	5526	23	644	46
hsa-miR-215-3p	ENSG00000273106	ENST00000727108.1	AC019129.2	142	-14.68	142	-14.68	5527	23	890	292
hsa-miR-215-3p	ENSG00000273106	ENST00000727112.1	AC019129.2	141	-13.36	141	-13.36	5529	23	260	1
hsa-miR-215-3p	ENSG00000259439	ENST00000432125.3	LINC01833	148	-20.07	148	-20.07	5534	23	2755	1828
hsa-miR-215-3p	ENSG00000259439	ENST00000437916.2	LINC01833	148	-20.07	148	-20.07	5536	23	2880	1558
hsa-miR-215-3p	ENSG00000259439	ENST00000760489.1	LINC01833	148	-20.07	148	-20.07	5540	23	1610	1265
hsa-miR-215-3p	ENSG00000259439	ENST00000760507.1	LINC01833	148	-20.07	148	-20.07	5542	23	1405	1255
hsa-miR-215-3p	ENSG00000259439	ENST00000760494.1	LINC01833	148	-20.07	148	-20.07	5543	23	1459	1309
hsa-miR-215-3p	ENSG00000259439	ENST00000760493.1	LINC01833	148	-20.07	148	-20.07	5544	23	1378	1228
hsa-miR-215-3p	ENSG00000259439	ENST00000760498.1	LINC01833	148	-20.07	148	-20.07	5545	23	1813	1666
hsa-miR-215-3p	ENSG00000280721	ENST00000628090.1	LINC01943	162	-18.74	162	-18.74	5563	23	926	795
hsa-miR-215-3p	ENSG00000224509	ENST00000791124.1	AC010884.1	140	-16.36	140	-16.36	5590	23	550	160
hsa-miR-215-3p	ENSG00000272994	ENST00000610036.2	AC012360.3	140	-13.06	140	-13.06	5596	23	3575	295
hsa-miR-215-3p	ENSG00000272994	ENST00000729451.1	AC012360.3	140	-13.06	140	-13.06	5597	23	2003	57
hsa-miR-215-3p	ENSG00000228857	ENST00000827895.1	AC104653.1	145	-12.45	145	-12.45	5603	23	1335	706
hsa-miR-215-3p	ENSG00000231013	ENST00000457436.2	AC013275.1	142	-18.88	142	-18.88	5639	23	2084	168
hsa-miR-215-3p	ENSG00000231013	ENST00000413602.1	AC013275.1	142	-18.88	142	-18.88	5640	23	2019	148
hsa-miR-215-3p	ENSG00000231013	ENST00000657643.1	AC013275.1	142	-18.88	142	-18.88	5642	23	2960	4
hsa-miR-215-3p	ENSG00000226806	ENST00000437007.2	AC011893.1	142	-18.38	142	-18.38	5643	23	1870	685
hsa-miR-215-3p	ENSG00000224063	ENST00000412276.6	AC007319.1	159	-22.22	159	-22.22	5649	23	1183	691
hsa-miR-215-3p	ENSG00000224063	ENST00000729959.1	AC007319.1	159	-22.22	159	-22.22	5654	23	358	32
hsa-miR-215-3p	ENSG00000230838	ENST00000768239.1	LINC01614	156	-16.91	156	-16.91	5657	23	2088	279
hsa-miR-215-3p	ENSG00000230838	ENST00000768240.1	LINC01614	156	-16.91	156	-16.91	5658	23	2138	329
hsa-miR-215-3p	ENSG00000230838	ENST00000415479.3	LINC01614	156	-16.91	156	-16.91	5659	23	2294	482
hsa-miR-215-3p	ENSG00000230838	ENST00000768241.1	LINC01614	156	-16.91	156	-16.91	5660	23	1978	172
hsa-miR-215-3p	ENSG00000250986	ENST00000511928.1	AC141928.1	143	-14.66	143	-14.66	5686	23	4525	3494
hsa-miR-215-3p	ENSG00000250846	ENST00000503625.2	EPHA5-AS1	294	-33.93	148	-19.36	5692	23	3348	632
hsa-miR-215-3p	ENSG00000272677	ENST00000609575.3	AC124016.1	144	-18.51	144	-18.51	5694	23	838	616
hsa-miR-215-3p	ENSG00000272677	ENST00000688760.2	AC124016.1	144	-18.51	144	-18.51	5695	23	710	491
hsa-miR-215-3p	ENSG00000272677	ENST00000843907.1	AC124016.1	144	-18.51	144	-18.51	5696	23	913	696
hsa-miR-215-3p	ENSG00000271474	ENST00000605849.2	AC106881.1	151	-22.97	151	-22.97	5698	23	3534	2801
hsa-miR-215-3p	ENSG00000246090	ENST00000757798.1	AP002026.1	144	-20.76	144	-20.76	5713	23	2009	939
hsa-miR-215-3p	ENSG00000246090	ENST00000691990.1	AP002026.1	144	-20.76	144	-20.76	5718	23	1647	928
hsa-miR-215-3p	ENSG00000246090	ENST00000757799.1	AP002026.1	144	-20.76	144	-20.76	5720	23	2240	1170
hsa-miR-215-3p	ENSG00000246090	ENST00000500358.6	AP002026.1	289	-34.4	145	-20.76	5728	23	4825	3377
hsa-miR-215-3p	ENSG00000246090	ENST00000661393.1	AP002026.1	144	-20.76	144	-20.76	5730	23	1910	1158
hsa-miR-215-3p	ENSG00000246090	ENST00000757800.1	AP002026.1	144	-20.76	144	-20.76	5749	23	1321	549
hsa-miR-215-3p	ENSG00000246090	ENST00000757830.1	AP002026.1	151	-16.28	151	-16.28	5750	23	454	75
hsa-miR-215-3p	ENSG00000246090	ENST00000757812.1	AP002026.1	151	-16.28	151	-16.28	5751	23	419	74
hsa-miR-215-3p	ENSG00000246090	ENST00000757828.1	AP002026.1	151	-16.28	151	-16.28	5752	23	363	72
hsa-miR-215-3p	ENSG00000246090	ENST00000506160.1	AP002026.1	151	-16.28	151	-16.28	5753	23	524	72
hsa-miR-215-3p	ENSG00000246090	ENST00000757803.1	AP002026.1	295	-37.04	151	-20.76	5754	23	988	66
hsa-miR-215-3p	ENSG00000246090	ENST00000506454.2	AP002026.1	151	-16.28	151	-16.28	5755	23	751	48
hsa-miR-215-3p	ENSG00000246090	ENST00000757804.1	AP002026.1	295	-37.04	151	-20.76	5756	23	752	17
hsa-miR-215-3p	ENSG00000246090	ENST00000757813.1	AP002026.1	144	-20.76	144	-20.76	5757	23	1002	225
hsa-miR-215-3p	ENSG00000246090	ENST00000757814.1	AP002026.1	144	-20.76	144	-20.76	5758	23	1289	215
hsa-miR-215-3p	ENSG00000246090	ENST00000757815.1	AP002026.1	144	-20.76	144	-20.76	5759	23	1229	450
hsa-miR-215-3p	ENSG00000246090	ENST00000757818.1	AP002026.1	144	-20.76	144	-20.76	5760	23	950	435
hsa-miR-215-3p	ENSG00000246090	ENST00000757816.1	AP002026.1	144	-20.76	144	-20.76	5761	23	1450	435
hsa-miR-215-3p	ENSG00000246090	ENST00000757817.1	AP002026.1	144	-20.76	144	-20.76	5762	23	1507	435
hsa-miR-215-3p	ENSG00000246090	ENST00000757820.1	AP002026.1	144	-20.76	144	-20.76	5763	23	1193	427
hsa-miR-215-3p	ENSG00000246090	ENST00000757821.1	AP002026.1	144	-20.76	144	-20.76	5764	23	704	188
hsa-miR-215-3p	ENSG00000246090	ENST00000757819.1	AP002026.1	144	-20.76	144	-20.76	5765	23	1193	416
hsa-miR-215-3p	ENSG00000246090	ENST00000757822.1	AP002026.1	144	-20.76	144	-20.76	5766	23	622	176
hsa-miR-215-3p	ENSG00000246090	ENST00000757827.1	AP002026.1	144	-20.76	144	-20.76	5767	23	1089	383
hsa-miR-215-3p	ENSG00000246090	ENST00000757823.1	AP002026.1	144	-20.76	144	-20.76	5768	23	1121	356
hsa-miR-215-3p	ENSG00000246090	ENST00000757824.1	AP002026.1	144	-20.76	144	-20.76	5769	23	1057	360
hsa-miR-215-3p	ENSG00000246090	ENST00000757825.1	AP002026.1	144	-20.76	144	-20.76	5770	23	1055	352
hsa-miR-215-3p	ENSG00000246090	ENST00000757826.1	AP002026.1	144	-20.76	144	-20.76	5771	23	879	113
hsa-miR-215-3p	ENSG00000246090	ENST00000509295.5	AP002026.1	144	-19.34	144	-19.34	5772	23	915	267
hsa-miR-215-3p	ENSG00000246090	ENST00000757833.1	AP002026.1	144	-20.76	144	-20.76	5774	23	1101	322
hsa-miR-215-3p	ENSG00000246090	ENST00000757834.1	AP002026.1	144	-20.76	144	-20.76	5775	23	1323	546
hsa-miR-215-3p	ENSG00000246090	ENST00000757839.1	AP002026.1	144	-20.76	144	-20.76	5776	23	1553	545
hsa-miR-215-3p	ENSG00000246090	ENST00000757838.1	AP002026.1	144	-20.76	144	-20.76	5777	23	1317	598
hsa-miR-215-3p	ENSG00000246090	ENST00000757836.1	AP002026.1	144	-20.76	144	-20.76	5778	23	1309	534
hsa-miR-215-3p	ENSG00000246090	ENST00000757835.1	AP002026.1	144	-20.76	144	-20.76	5779	23	1135	545
hsa-miR-215-3p	ENSG00000246090	ENST00000757837.1	AP002026.1	144	-20.76	144	-20.76	5780	23	1025	259
hsa-miR-215-3p	ENSG00000246090	ENST00000757844.1	AP002026.1	144	-20.76	144	-20.76	5781	23	1061	358
hsa-miR-215-3p	ENSG00000246090	ENST00000757845.1	AP002026.1	144	-20.76	144	-20.76	5782	23	1361	307
hsa-miR-215-3p	ENSG00000177822	ENST00000509012.5	AC098864.1	149	-17.16	149	-17.16	5797	23	564	128
hsa-miR-215-3p	ENSG00000177822	ENST00000763505.1	AC098864.1	147	-18.79	147	-18.79	5798	23	981	118
hsa-miR-215-3p	ENSG00000177822	ENST00000763531.1	AC098864.1	147	-17.48	147	-17.48	5799	23	511	78
hsa-miR-215-3p	ENSG00000177822	ENST00000763504.1	AC098864.1	147	-18.79	147	-18.79	5801	23	1850	380
hsa-miR-215-3p	ENSG00000177822	ENST00000507869.7	AC098864.1	296	-35.95	149	-18.79	5802	23	2296	108
hsa-miR-215-3p	ENSG00000177822	ENST00000763499.1	AC098864.1	296	-35.95	149	-18.79	5804	23	1946	194
hsa-miR-215-3p	ENSG00000177822	ENST00000669431.2	AC098864.1	147	-18.79	147	-18.79	5805	23	1842	377
hsa-miR-215-3p	ENSG00000177822	ENST00000763498.1	AC098864.1	149	-17.16	149	-17.16	5806	23	1675	407
hsa-miR-215-3p	ENSG00000177822	ENST00000763496.1	AC098864.1	149	-17.16	149	-17.16	5808	23	1537	277
hsa-miR-215-3p	ENSG00000177822	ENST00000763508.1	AC098864.1	147	-18.79	147	-18.79	5811	23	565	13
hsa-miR-215-3p	ENSG00000177822	ENST00000763503.1	AC098864.1	149	-17.16	149	-17.16	5812	23	678	73
hsa-miR-215-3p	ENSG00000177822	ENST00000763502.1	AC098864.1	149	-17.16	149	-17.16	5813	23	748	135
hsa-miR-215-3p	ENSG00000177822	ENST00000763507.1	AC098864.1	147	-18.79	147	-18.79	5815	23	754	59
hsa-miR-215-3p	ENSG00000177822	ENST00000763501.1	AC098864.1	149	-17.16	149	-17.16	5816	23	783	176
hsa-miR-215-3p	ENSG00000177822	ENST00000763522.1	AC098864.1	147	-18.79	147	-18.79	5818	23	559	7
hsa-miR-215-3p	ENSG00000177822	ENST00000763510.1	AC098864.1	149	-17.16	149	-17.16	5819	23	820	126
hsa-miR-215-3p	ENSG00000177822	ENST00000763509.1	AC098864.1	296	-35.95	149	-18.79	5820	23	927	140
hsa-miR-215-3p	ENSG00000177822	ENST00000763515.1	AC098864.1	299	-43.37	150	-26.21	5821	23	613	477
hsa-miR-215-3p	ENSG00000177822	ENST00000763518.1	AC098864.1	299	-43.37	150	-26.21	5822	23	621	486
hsa-miR-215-3p	ENSG00000177822	ENST00000763516.1	AC098864.1	446	-62.16	150	-26.21	5823	23	964	829
hsa-miR-215-3p	ENSG00000177822	ENST00000763513.1	AC098864.1	299	-43.37	150	-26.21	5824	23	512	377
hsa-miR-215-3p	ENSG00000177822	ENST00000505537.2	AC098864.1	446	-62.16	150	-26.21	5825	23	999	864
hsa-miR-215-3p	ENSG00000177822	ENST00000763512.1	AC098864.1	299	-43.37	150	-26.21	5826	23	679	546
hsa-miR-215-3p	ENSG00000177822	ENST00000763514.1	AC098864.1	150	-26.21	150	-26.21	5827	23	555	424
hsa-miR-215-3p	ENSG00000177822	ENST00000763517.1	AC098864.1	446	-62.16	150	-26.21	5828	23	1328	1199
hsa-miR-215-3p	ENSG00000177822	ENST00000763519.1	AC098864.1	296	-35.95	149	-18.79	5829	23	801	124
hsa-miR-215-3p	ENSG00000177822	ENST00000763520.1	AC098864.1	306	-36.63	157	-19.47	5830	23	947	768
hsa-miR-215-3p	ENSG00000177822	ENST00000763521.1	AC098864.1	149	-17.16	149	-17.16	5831	23	546	188
hsa-miR-215-3p	ENSG00000177822	ENST00000513752.5	AC098864.1	149	-17.16	149	-17.16	5832	23	805	235
hsa-miR-215-3p	ENSG00000177822	ENST00000763532.1	AC098864.1	149	-17.16	149	-17.16	5834	23	684	178
hsa-miR-215-3p	ENSG00000177822	ENST00000763535.1	AC098864.1	149	-17.16	149	-17.16	5836	23	2000	73
hsa-miR-215-3p	ENSG00000177822	ENST00000315302.7	AC098864.1	149	-17.16	149	-17.16	5837	23	2361	292
hsa-miR-215-3p	ENSG00000177822	ENST00000763533.1	AC098864.1	149	-17.16	149	-17.16	5839	23	2317	334
hsa-miR-215-3p	ENSG00000177822	ENST00000508968.2	AC098864.1	149	-17.16	149	-17.16	5840	23	2054	369
hsa-miR-215-3p	ENSG00000177822	ENST00000505873.2	AC098864.1	149	-17.16	149	-17.16	5841	23	1890	209
hsa-miR-215-3p	ENSG00000177822	ENST00000763536.1	AC098864.1	149	-17.16	149	-17.16	5842	23	1933	132
hsa-miR-215-3p	ENSG00000177822	ENST00000763537.1	AC098864.1	149	-17.16	149	-17.16	5843	23	1631	120
hsa-miR-215-3p	ENSG00000177822	ENST00000763540.1	AC098864.1	149	-17.16	149	-17.16	5845	23	658	178
hsa-miR-215-3p	ENSG00000177822	ENST00000702033.1	AC098864.1	149	-17.16	149	-17.16	5846	23	444	209
hsa-miR-215-3p	ENSG00000247516	ENST00000667556.1	MIR4458HG	143	-11.57	143	-11.57	5867	23	1108	1005
hsa-miR-215-3p	ENSG00000247516	ENST00000605918.1	MIR4458HG	143	-11.57	143	-11.57	5872	23	1057	963
hsa-miR-215-3p	ENSG00000247516	ENST00000669668.1	MIR4458HG	289	-27.45	146	-15.88	5873	23	2115	2045
hsa-miR-215-3p	ENSG00000247516	ENST00000502001.2	MIR4458HG	143	-11.57	143	-11.57	5874	23	1005	335
hsa-miR-215-3p	ENSG00000247516	ENST00000664641.2	MIR4458HG	429	-44.1	146	-16.65	5875	23	3370	1864
hsa-miR-215-3p	ENSG00000247516	ENST00000606459.1	MIR4458HG	429	-44.1	146	-16.65	5876	23	3239	1734
hsa-miR-215-3p	ENSG00000247516	ENST00000652260.1	MIR4458HG	143	-11.57	143	-11.57	5878	23	1198	122
hsa-miR-215-3p	ENSG00000247516	ENST00000721171.1	MIR4458HG	143	-11.57	143	-11.57	5880	23	1070	246
hsa-miR-215-3p	ENSG00000259663	ENST00000601500.1	AC010478.1	142	-9.85	142	-9.85	5900	23	6762	5966
hsa-miR-215-3p	ENSG00000245526	ENST00000506041.2	LINC00461	152	-18.93	152	-18.93	5904	23	1626	1243
hsa-miR-215-3p	ENSG00000245526	ENST00000715786.1	LINC00461	144	-16.61	144	-16.61	5905	23	1486	390
hsa-miR-215-3p	ENSG00000245526	ENST00000504034.3	LINC00461	144	-16.61	144	-16.61	5908	23	1114	411
hsa-miR-215-3p	ENSG00000245526	ENST00000787068.1	LINC00461	144	-16.61	144	-16.61	5909	23	1097	333
hsa-miR-215-3p	ENSG00000245526	ENST00000787069.1	LINC00461	144	-16.61	144	-16.61	5910	23	1673	345
hsa-miR-215-3p	ENSG00000245526	ENST00000787094.1	LINC00461	144	-16.61	144	-16.61	5911	23	981	408
hsa-miR-215-3p	ENSG00000245526	ENST00000787070.1	LINC00461	144	-16.61	144	-16.61	5912	23	1058	485
hsa-miR-215-3p	ENSG00000245526	ENST00000787098.1	LINC00461	144	-16.61	144	-16.61	5913	23	823	262
hsa-miR-215-3p	ENSG00000245526	ENST00000787100.1	LINC00461	144	-10.21	144	-10.21	5967	23	2015	1161
hsa-miR-215-3p	ENSG00000245526	ENST00000787104.1	LINC00461	144	-10.21	144	-10.21	5968	23	980	907
hsa-miR-215-3p	ENSG00000245526	ENST00000787115.1	LINC00461	145	-20.95	145	-20.95	5974	23	2403	971
hsa-miR-215-3p	ENSG00000245526	ENST00000500197.6	LINC00461	145	-20.95	145	-20.95	5975	23	3381	1952
hsa-miR-215-3p	ENSG00000245526	ENST00000505030.6	LINC00461	145	-20.95	145	-20.95	5976	23	3957	2528
hsa-miR-215-3p	ENSG00000245526	ENST00000658935.2	LINC00461	145	-20.95	145	-20.95	5977	23	2923	1494
hsa-miR-215-3p	ENSG00000245526	ENST00000511014.8	LINC00461	145	-20.95	145	-20.95	5978	23	3584	2155
hsa-miR-215-3p	ENSG00000245526	ENST00000663276.2	LINC00461	145	-20.95	145	-20.95	5979	23	3406	1977
hsa-miR-215-3p	ENSG00000245526	ENST00000666342.1	LINC00461	145	-20.95	145	-20.95	5980	23	2996	1579
hsa-miR-215-3p	ENSG00000245526	ENST00000509265.2	LINC00461	145	-20.95	145	-20.95	5981	23	3694	2284
hsa-miR-215-3p	ENSG00000245526	ENST00000666195.1	LINC00461	145	-20.95	145	-20.95	5982	23	3409	2020
hsa-miR-215-3p	ENSG00000245526	ENST00000661688.1	LINC00461	145	-20.95	145	-20.95	5983	23	2469	1978
hsa-miR-215-3p	ENSG00000245526	ENST00000671230.1	LINC00461	153	-17.18	153	-17.18	5994	23	2255	1205
hsa-miR-215-3p	ENSG00000245526	ENST00000655936.2	LINC00461	284	-32.15	144	-19.88	5997	23	2830	1295
hsa-miR-215-3p	ENSG00000245526	ENST00000652822.2	LINC00461	144	-19.88	144	-19.88	5998	23	1108	312
hsa-miR-215-3p	ENSG00000248663	ENST00000514186.5	LINC00992	140	-14.64	140	-14.64	6009	23	564	65
hsa-miR-215-3p	ENSG00000248663	ENST00000828619.1	LINC00992	142	-16.43	142	-16.43	6012	23	997	828
hsa-miR-215-3p	ENSG00000248663	ENST00000828612.1	LINC00992	145	-14.74	145	-14.74	6019	23	1029	296
hsa-miR-215-3p	ENSG00000280780	ENST00000702407.1	JAKMIP2-AS1	292	-29.2	152	-14.9	6026	23	2990	2449
hsa-miR-215-3p	ENSG00000271730	ENST00000605885.1	AL390208.1	141	-18.12	141	-18.12	6039	23	644	182
hsa-miR-215-3p	ENSG00000270419	ENST00000816707.1	CAHM	141	-13.62	141	-13.62	6060	23	587	427
hsa-miR-215-3p	ENSG00000270419	ENST00000816709.1	CAHM	280	-25.48	140	-15.11	6063	23	2417	334
hsa-miR-215-3p	ENSG00000270419	ENST00000604200.3	CAHM	314	-36.45	165	-20.15	6065	23	1815	1704
hsa-miR-215-3p	ENSG00000229533	ENST00000452700.1	AC003986.1	297	-32.73	152	-17.21	6107	23	1526	1255
hsa-miR-215-3p	ENSG00000231764	ENST00000430027.3	DLX6-AS1	725	-89.19	153	-20.44	6121	23	15364	2253
hsa-miR-215-3p	ENSG00000231764	ENST00000659765.2	DLX6-AS1	294	-38.19	153	-20.38	6122	23	4722	1889
hsa-miR-215-3p	ENSG00000231764	ENST00000458352.5	DLX6-AS1	436	-51.8	153	-20.38	6123	23	5529	2727
hsa-miR-215-3p	ENSG00000231764	ENST00000656954.2	DLX6-AS1	294	-38.19	153	-20.38	6124	23	4413	1712
hsa-miR-215-3p	ENSG00000231764	ENST00000605417.6	DLX6-AS1	436	-51.8	153	-20.38	6125	23	3995	1447
hsa-miR-215-3p	ENSG00000231764	ENST00000841658.1	DLX6-AS1	283	-33.99	142	-20.38	6126	23	920	161
hsa-miR-215-3p	ENSG00000231764	ENST00000841669.1	DLX6-AS1	141	-20.38	141	-20.38	6127	23	1183	1047
hsa-miR-215-3p	ENSG00000231764	ENST00000841661.1	DLX6-AS1	141	-20.38	141	-20.38	6128	23	447	311
hsa-miR-215-3p	ENSG00000231764	ENST00000841667.1	DLX6-AS1	294	-38.19	153	-20.38	6129	23	2487	1029
hsa-miR-215-3p	ENSG00000231764	ENST00000688080.2	DLX6-AS1	141	-20.38	141	-20.38	6130	23	1413	1279
hsa-miR-215-3p	ENSG00000231764	ENST00000841643.1	DLX6-AS1	141	-20.38	141	-20.38	6131	23	526	393
hsa-miR-215-3p	ENSG00000231764	ENST00000658043.1	DLX6-AS1	294	-38.19	153	-20.38	6132	23	3119	1714
hsa-miR-215-3p	ENSG00000231764	ENST00000654988.1	DLX6-AS1	436	-51.8	153	-20.38	6133	23	3001	1596
hsa-miR-215-3p	ENSG00000231764	ENST00000841663.1	DLX6-AS1	153	-17.81	153	-17.81	6134	23	2338	2267
hsa-miR-215-3p	ENSG00000231764	ENST00000841671.1	DLX6-AS1	142	-13.61	142	-13.61	6144	23	1944	518
hsa-miR-215-3p	ENSG00000231764	ENST00000437541.3	DLX6-AS1	142	-13.61	142	-13.61	6147	23	1551	132
hsa-miR-215-3p	ENSG00000231764	ENST00000685183.2	DLX6-AS1	142	-13.61	142	-13.61	6156	23	3802	2139
hsa-miR-215-3p	ENSG00000231764	ENST00000841697.1	DLX6-AS1	142	-13.61	142	-13.61	6157	23	1562	518
hsa-miR-215-3p	ENSG00000239569	ENST00000787494.1	KMT2E-AS1	144	-13.33	144	-13.33	6192	23	909	302
hsa-miR-215-3p	ENSG00000254377	ENST00000671254.3	MIR124-2HG	167	-24.37	167	-24.37	6254	23	2168	691
hsa-miR-215-3p	ENSG00000254377	ENST00000521441.3	MIR124-2HG	167	-24.37	167	-24.37	6256	23	3021	42
hsa-miR-215-3p	ENSG00000254377	ENST00000665390.2	MIR124-2HG	167	-24.37	167	-24.37	6257	23	2427	38
hsa-miR-215-3p	ENSG00000254377	ENST00000772497.1	MIR124-2HG	167	-24.37	167	-24.37	6258	23	862	16
hsa-miR-215-3p	ENSG00000254377	ENST00000772498.1	MIR124-2HG	167	-24.37	167	-24.37	6259	23	2812	3
hsa-miR-215-3p	ENSG00000254377	ENST00000657723.3	MIR124-2HG	167	-24.37	167	-24.37	6260	23	2392	2
hsa-miR-215-3p	ENSG00000284116	ENST00000809242.1	AL772307.1	151	-14.54	151	-14.54	6312	23	1414	781
hsa-miR-215-3p	ENSG00000284116	ENST00000809241.1	AL772307.1	151	-14.54	151	-14.54	6313	23	1326	714
hsa-miR-215-3p	ENSG00000284116	ENST00000809443.1	AL772307.1	284	-36.57	143	-20.66	6339	23	1547	751
hsa-miR-215-3p	ENSG00000284116	ENST00000809444.1	AL772307.1	284	-36.57	143	-20.66	6340	23	1594	807
hsa-miR-215-3p	ENSG00000284116	ENST00000809455.1	AL772307.1	284	-36.57	143	-20.66	6341	23	700	586
hsa-miR-215-3p	ENSG00000284116	ENST00000809445.1	AL772307.1	141	-15.91	141	-15.91	6342	23	545	413
hsa-miR-215-3p	ENSG00000284116	ENST00000809448.1	AL772307.1	145	-23.28	145	-23.28	6346	23	1271	687
hsa-miR-215-3p	ENSG00000284116	ENST00000809449.1	AL772307.1	145	-23.28	145	-23.28	6347	23	832	661
hsa-miR-215-3p	ENSG00000284116	ENST00000809450.1	AL772307.1	145	-23.28	145	-23.28	6348	23	993	829
hsa-miR-215-3p	ENSG00000204802	ENST00000717363.1	AL590399.1	141	-15.59	141	-15.59	6354	23	780	455
hsa-miR-215-3p	ENSG00000204802	ENST00000377518.4	AL590399.1	298	-27.79	157	-14.76	6364	23	2784	1090
hsa-miR-215-3p	ENSG00000204802	ENST00000717371.1	AL590399.1	141	-13.03	141	-13.03	6367	23	1071	759
hsa-miR-215-3p	ENSG00000204802	ENST00000717374.1	AL590399.1	141	-13.03	141	-13.03	6370	23	1714	679
hsa-miR-215-3p	ENSG00000204802	ENST00000429818.2	AL590399.1	141	-13.03	141	-13.03	6371	23	1566	531
hsa-miR-215-3p	ENSG00000204802	ENST00000755027.1	AL590399.1	141	-13.03	141	-13.03	6372	23	1150	815
hsa-miR-215-3p	ENSG00000204802	ENST00000717375.1	AL590399.1	141	-13.03	141	-13.03	6373	23	366	194
hsa-miR-215-3p	ENSG00000204802	ENST00000717377.1	AL590399.1	141	-13.03	141	-13.03	6374	23	358	186
hsa-miR-215-3p	ENSG00000204802	ENST00000430302.2	AL590399.1	141	-13.03	141	-13.03	6375	23	788	616
hsa-miR-215-3p	ENSG00000204802	ENST00000755029.1	AL590399.1	141	-13.03	141	-13.03	6376	23	558	386
hsa-miR-215-3p	ENSG00000204802	ENST00000755028.1	AL590399.1	298	-27.79	157	-14.76	6377	23	1399	1038
hsa-miR-215-3p	ENSG00000204802	ENST00000412631.2	AL590399.1	141	-13.03	141	-13.03	6378	23	901	729
hsa-miR-215-3p	ENSG00000204802	ENST00000717376.1	AL590399.1	141	-13.03	141	-13.03	6379	23	357	188
hsa-miR-215-3p	ENSG00000204802	ENST00000717379.1	AL590399.1	141	-13.03	141	-13.03	6380	23	621	452
hsa-miR-215-3p	ENSG00000204802	ENST00000717378.1	AL590399.1	141	-13.03	141	-13.03	6381	23	394	229
hsa-miR-215-3p	ENSG00000204802	ENST00000755030.1	AL590399.1	298	-27.79	157	-14.76	6382	23	1370	1016
hsa-miR-215-3p	ENSG00000269929	ENST00000711292.1	AL158152.1	147	-19.85	147	-19.85	6407	23	711	108
hsa-miR-215-3p	ENSG00000196366	ENST00000354376.3	C9orf163	140	-9.77	140	-9.77	6410	23	2572	2509
hsa-miR-215-3p	ENSG00000196366	ENST00000624034.1	C9orf163	140	-9.77	140	-9.77	6411	23	2573	2509
hsa-miR-215-3p	ENSG00000225383	ENST00000602763.7	SFTA1P	141	-18.83	141	-18.83	6412	23	653	330
hsa-miR-215-3p	ENSG00000225383	ENST00000660024.2	SFTA1P	141	-18.83	141	-18.83	6413	23	708	385
hsa-miR-215-3p	ENSG00000225383	ENST00000739713.1	SFTA1P	141	-18.83	141	-18.83	6414	23	430	108
hsa-miR-215-3p	ENSG00000225383	ENST00000634899.2	SFTA1P	141	-18.83	141	-18.83	6415	23	412	90
hsa-miR-215-3p	ENSG00000225383	ENST00000739712.1	SFTA1P	141	-18.83	141	-18.83	6416	23	433	111
hsa-miR-215-3p	ENSG00000225383	ENST00000665724.1	SFTA1P	141	-18.83	141	-18.83	6417	23	570	248
hsa-miR-215-3p	ENSG00000225383	ENST00000656654.1	SFTA1P	141	-18.83	141	-18.83	6418	23	570	248
hsa-miR-215-3p	ENSG00000225383	ENST00000653216.1	SFTA1P	141	-18.83	141	-18.83	6419	23	686	235
hsa-miR-215-3p	ENSG00000225383	ENST00000446372.3	SFTA1P	141	-18.83	141	-18.83	6420	23	710	388
hsa-miR-215-3p	ENSG00000225383	ENST00000739711.1	SFTA1P	141	-18.83	141	-18.83	6421	23	665	267
hsa-miR-215-3p	ENSG00000225383	ENST00000739710.1	SFTA1P	141	-18.83	141	-18.83	6422	23	557	235
hsa-miR-215-3p	ENSG00000225383	ENST00000667544.1	SFTA1P	141	-18.83	141	-18.83	6423	23	781	459
hsa-miR-215-3p	ENSG00000225383	ENST00000415590.8	SFTA1P	141	-18.83	141	-18.83	6424	23	602	280
hsa-miR-215-3p	ENSG00000225383	ENST00000434919.7	SFTA1P	141	-18.83	141	-18.83	6425	23	498	176
hsa-miR-215-3p	ENSG00000225383	ENST00000739709.1	SFTA1P	141	-18.83	141	-18.83	6426	23	580	258
hsa-miR-215-3p	ENSG00000225383	ENST00000663743.1	SFTA1P	141	-18.83	141	-18.83	6427	23	675	355
hsa-miR-215-3p	ENSG00000225383	ENST00000652890.1	SFTA1P	141	-18.83	141	-18.83	6428	23	2459	318
hsa-miR-215-3p	ENSG00000272447	ENST00000605920.1	AL135925.1	141	-11.86	141	-11.86	6482	23	1701	1486
hsa-miR-215-3p	ENSG00000180139	ENST00000627669.1	ACTA2-AS1	169	-22.98	169	-22.98	6483	23	762	505
hsa-miR-215-3p	ENSG00000180139	ENST00000437930.4	ACTA2-AS1	309	-34.63	169	-22.98	6484	23	2450	252
hsa-miR-215-3p	ENSG00000232229	ENST00000749378.1	LINC00865	160	-22.97	160	-22.97	6500	23	738	1
hsa-miR-215-3p	ENSG00000232229	ENST00000664430.1	LINC00865	150	-20.32	150	-20.32	6501	23	1100	1
hsa-miR-215-3p	ENSG00000273599	ENST00000617058.1	AL731571.1	140	-15.68	140	-15.68	6508	23	5428	499
hsa-miR-215-3p	ENSG00000254815	ENST00000527620.5	AP006284.1	149	-13.06	149	-13.06	6509	23	2210	1912
hsa-miR-215-3p	ENSG00000254815	ENST00000527113.2	AP006284.1	149	-13.06	149	-13.06	6510	23	530	229
hsa-miR-215-3p	ENSG00000254815	ENST00000659402.2	AP006284.1	149	-13.06	149	-13.06	6511	23	545	239
hsa-miR-215-3p	ENSG00000254815	ENST00000533844.1	AP006284.1	149	-13.06	149	-13.06	6512	23	537	238
hsa-miR-215-3p	ENSG00000235027	ENST00000449248.1	AC068580.3	147	-15.95	147	-15.95	6516	23	2015	755
hsa-miR-215-3p	ENSG00000255320	ENST00000791487.1	AP000759.1	146	-15.65	146	-15.65	6521	23	913	504
hsa-miR-215-3p	ENSG00000255320	ENST00000791491.1	AP000759.1	146	-15.65	146	-15.65	6522	23	904	499
hsa-miR-215-3p	ENSG00000255320	ENST00000791493.1	AP000759.1	146	-15.65	146	-15.65	6523	23	1215	827
hsa-miR-215-3p	ENSG00000255320	ENST00000686198.2	AP000759.1	146	-15.65	146	-15.65	6524	23	1044	796
hsa-miR-215-3p	ENSG00000255320	ENST00000531086.1	AP000759.1	146	-15.65	146	-15.65	6525	23	397	279
hsa-miR-215-3p	ENSG00000255320	ENST00000791492.1	AP000759.1	146	-15.65	146	-15.65	6526	23	635	517
hsa-miR-215-3p	ENSG00000255320	ENST00000791489.1	AP000759.1	146	-15.65	146	-15.65	6527	23	656	538
hsa-miR-215-3p	ENSG00000255320	ENST00000791497.1	AP000759.1	146	-15.65	146	-15.65	6528	23	840	723
hsa-miR-215-3p	ENSG00000255320	ENST00000791495.1	AP000759.1	146	-15.65	146	-15.65	6529	23	666	549
hsa-miR-215-3p	ENSG00000255320	ENST00000791494.1	AP000759.1	146	-15.65	146	-15.65	6530	23	781	664
hsa-miR-215-3p	ENSG00000255320	ENST00000791490.1	AP000759.1	146	-15.65	146	-15.65	6531	23	691	574
hsa-miR-215-3p	ENSG00000255320	ENST00000791499.1	AP000759.1	146	-15.65	146	-15.65	6532	23	750	635
hsa-miR-215-3p	ENSG00000255320	ENST00000791498.1	AP000759.1	146	-15.65	146	-15.65	6533	23	617	503
hsa-miR-215-3p	ENSG00000255320	ENST00000791496.1	AP000759.1	146	-15.65	146	-15.65	6534	23	705	592
hsa-miR-215-3p	ENSG00000255320	ENST00000791488.1	AP000759.1	288	-29.47	146	-15.65	6535	23	633	520
hsa-miR-215-3p	ENSG00000255248	ENST00000690151.3	MIR100HG	156	-15.83	156	-15.83	6549	23	1360	6
hsa-miR-215-3p	ENSG00000255248	ENST00000691884.3	MIR100HG	156	-15.83	156	-15.83	6550	23	1210	73
hsa-miR-215-3p	ENSG00000255248	ENST00000690198.1	MIR100HG	150	-18.34	150	-18.34	6551	23	1301	125
hsa-miR-215-3p	ENSG00000255248	ENST00000780452.1	MIR100HG	150	-18.34	150	-18.34	6552	23	1180	125
hsa-miR-215-3p	ENSG00000255248	ENST00000780451.1	MIR100HG	150	-18.34	150	-18.34	6553	23	854	126
hsa-miR-215-3p	ENSG00000255248	ENST00000692610.3	MIR100HG	150	-18.34	150	-18.34	6554	23	1156	154
hsa-miR-215-3p	ENSG00000255248	ENST00000702652.2	MIR100HG	150	-18.34	150	-18.34	6555	23	946	161
hsa-miR-215-3p	ENSG00000255248	ENST00000780450.1	MIR100HG	161	-22.5	161	-22.5	6556	23	810	19
hsa-miR-215-3p	ENSG00000255248	ENST00000530955.3	MIR100HG	311	-40.84	161	-22.5	6557	23	1203	21
hsa-miR-215-3p	ENSG00000255248	ENST00000780449.1	MIR100HG	161	-22.5	161	-22.5	6558	23	705	30
hsa-miR-215-3p	ENSG00000255248	ENST00000701835.2	MIR100HG	311	-40.84	161	-22.5	6559	23	1669	96
hsa-miR-215-3p	ENSG00000255248	ENST00000780448.1	MIR100HG	161	-22.5	161	-22.5	6573	23	941	61
hsa-miR-215-3p	ENSG00000255248	ENST00000688615.1	MIR100HG	150	-18.34	150	-18.34	6576	23	1514	125
hsa-miR-215-3p	ENSG00000255248	ENST00000780453.1	MIR100HG	150	-18.34	150	-18.34	6577	23	1547	125
hsa-miR-215-3p	ENSG00000255248	ENST00000661432.1	MIR100HG	150	-18.34	150	-18.34	6579	23	1019	172
hsa-miR-215-3p	ENSG00000255248	ENST00000665519.1	MIR100HG	161	-22.5	161	-22.5	6581	23	1039	14
hsa-miR-215-3p	ENSG00000255248	ENST00000647591.1	MIR100HG	156	-13.11	156	-13.11	6583	23	3218	1217
hsa-miR-215-3p	ENSG00000255248	ENST00000660148.1	MIR100HG	156	-13.11	156	-13.11	6584	23	2859	1224
hsa-miR-215-3p	ENSG00000255248	ENST00000647749.1	MIR100HG	306	-31.45	156	-18.34	6586	23	2338	1366
hsa-miR-215-3p	ENSG00000255248	ENST00000532319.2	MIR100HG	156	-13.11	156	-13.11	6587	23	3003	1234
hsa-miR-215-3p	ENSG00000255248	ENST00000657554.1	MIR100HG	150	-18.34	150	-18.34	6588	23	1609	128
hsa-miR-215-3p	ENSG00000255248	ENST00000670198.1	MIR100HG	306	-31.45	156	-18.34	6592	23	3098	1501
hsa-miR-215-3p	ENSG00000255248	ENST00000666485.1	MIR100HG	296	-36.98	150	-18.7	6593	23	4195	2439
hsa-miR-215-3p	ENSG00000255248	ENST00000656226.1	MIR100HG	156	-13.11	156	-13.11	6594	23	3014	1178
hsa-miR-215-3p	ENSG00000255248	ENST00000656682.1	MIR100HG	156	-13.11	156	-13.11	6595	23	4534	1212
hsa-miR-215-3p	ENSG00000255248	ENST00000659296.1	MIR100HG	306	-31.45	156	-18.34	6596	23	4175	1250
hsa-miR-215-3p	ENSG00000255248	ENST00000649626.1	MIR100HG	150	-18.34	150	-18.34	6597	23	1491	152
hsa-miR-215-3p	ENSG00000255248	ENST00000530072.7	MIR100HG	306	-34.17	156	-18.34	6601	23	3673	568
hsa-miR-215-3p	ENSG00000255248	ENST00000531381.1	MIR100HG	311	-40.84	161	-22.5	6602	23	3370	71
hsa-miR-215-3p	ENSG00000255248	ENST00000529823.3	MIR100HG	311	-40.84	161	-22.5	6603	23	3368	90
hsa-miR-215-3p	ENSG00000255248	ENST00000654519.2	MIR100HG	311	-40.84	161	-22.5	6604	23	3393	94
hsa-miR-215-3p	ENSG00000255248	ENST00000668776.2	MIR100HG	149	-18.74	149	-18.74	6608	23	4383	673
hsa-miR-215-3p	ENSG00000255248	ENST00000532890.6	MIR100HG	150	-18.34	150	-18.34	6610	23	2973	222
hsa-miR-215-3p	ENSG00000255248	ENST00000528986.2	MIR100HG	306	-34.17	156	-18.34	6612	23	3514	429
hsa-miR-215-3p	ENSG00000255248	ENST00000531071.6	MIR100HG	311	-40.84	161	-22.5	6613	23	3399	87
hsa-miR-215-3p	ENSG00000255248	ENST00000665673.1	MIR100HG	161	-22.5	161	-22.5	6614	23	2811	96
hsa-miR-215-3p	ENSG00000255248	ENST00000780487.1	MIR100HG	161	-22.5	161	-22.5	6630	23	1093	71
hsa-miR-215-3p	ENSG00000255248	ENST00000780488.1	MIR100HG	161	-22.5	161	-22.5	6643	23	632	147
hsa-miR-215-3p	ENSG00000255248	ENST00000780503.1	MIR100HG	467	-56.67	161	-22.5	6653	23	1728	82
hsa-miR-215-3p	ENSG00000255248	ENST00000780505.1	MIR100HG	467	-56.67	161	-22.5	6654	23	1671	284
hsa-miR-215-3p	ENSG00000255248	ENST00000531629.2	MIR100HG	150	-18.34	150	-18.34	6655	23	593	156
hsa-miR-215-3p	ENSG00000255248	ENST00000654571.2	MIR100HG	140	-17.22	140	-17.22	6684	23	1720	1401
hsa-miR-215-3p	ENSG00000255248	ENST00000780423.1	MIR100HG	140	-17.22	140	-17.22	6685	23	1432	1137
hsa-miR-215-3p	ENSG00000255248	ENST00000780473.1	MIR100HG	140	-17.22	140	-17.22	6686	23	872	661
hsa-miR-215-3p	ENSG00000255248	ENST00000780422.1	MIR100HG	140	-17.22	140	-17.22	6687	23	1190	979
hsa-miR-215-3p	ENSG00000255248	ENST00000780394.1	MIR100HG	140	-17.22	140	-17.22	6688	23	775	564
hsa-miR-215-3p	ENSG00000255248	ENST00000780424.1	MIR100HG	140	-17.22	140	-17.22	6689	23	948	739
hsa-miR-215-3p	ENSG00000255248	ENST00000702516.2	MIR100HG	140	-17.22	140	-17.22	6690	23	1131	923
hsa-miR-215-3p	ENSG00000255248	ENST00000780492.1	MIR100HG	140	-17.22	140	-17.22	6691	23	741	534
hsa-miR-215-3p	ENSG00000255248	ENST00000780491.1	MIR100HG	140	-17.22	140	-17.22	6692	23	709	502
hsa-miR-215-3p	ENSG00000255248	ENST00000780490.1	MIR100HG	140	-17.22	140	-17.22	6693	23	494	287
hsa-miR-215-3p	ENSG00000255248	ENST00000780489.1	MIR100HG	140	-17.22	140	-17.22	6694	23	651	444
hsa-miR-215-3p	ENSG00000255248	ENST00000780476.1	MIR100HG	140	-17.22	140	-17.22	6695	23	674	467
hsa-miR-215-3p	ENSG00000255248	ENST00000780474.1	MIR100HG	140	-17.22	140	-17.22	6696	23	776	569
hsa-miR-215-3p	ENSG00000255248	ENST00000780460.1	MIR100HG	140	-17.22	140	-17.22	6697	23	1030	823
hsa-miR-215-3p	ENSG00000255248	ENST00000780433.1	MIR100HG	140	-17.22	140	-17.22	6698	23	1047	840
hsa-miR-215-3p	ENSG00000255248	ENST00000780432.1	MIR100HG	140	-17.22	140	-17.22	6699	23	848	641
hsa-miR-215-3p	ENSG00000255248	ENST00000780430.1	MIR100HG	140	-17.22	140	-17.22	6700	23	889	682
hsa-miR-215-3p	ENSG00000255248	ENST00000780431.1	MIR100HG	140	-17.22	140	-17.22	6701	23	867	660
hsa-miR-215-3p	ENSG00000255248	ENST00000780429.1	MIR100HG	140	-17.22	140	-17.22	6702	23	1038	831
hsa-miR-215-3p	ENSG00000255248	ENST00000780428.1	MIR100HG	140	-17.22	140	-17.22	6703	23	808	601
hsa-miR-215-3p	ENSG00000255248	ENST00000780427.1	MIR100HG	140	-17.22	140	-17.22	6704	23	771	564
hsa-miR-215-3p	ENSG00000255248	ENST00000780426.1	MIR100HG	140	-17.22	140	-17.22	6705	23	707	500
hsa-miR-215-3p	ENSG00000255248	ENST00000780425.1	MIR100HG	140	-17.22	140	-17.22	6706	23	911	704
hsa-miR-215-3p	ENSG00000255248	ENST00000686772.2	MIR100HG	140	-17.22	140	-17.22	6707	23	923	716
hsa-miR-215-3p	ENSG00000255248	ENST00000660329.3	MIR100HG	140	-17.22	140	-17.22	6708	23	1077	870
hsa-miR-215-3p	ENSG00000255248	ENST00000780420.1	MIR100HG	140	-17.22	140	-17.22	6709	23	995	788
hsa-miR-215-3p	ENSG00000255248	ENST00000780421.1	MIR100HG	140	-17.22	140	-17.22	6710	23	1198	991
hsa-miR-215-3p	ENSG00000255248	ENST00000780413.1	MIR100HG	140	-17.22	140	-17.22	6711	23	682	475
hsa-miR-215-3p	ENSG00000255248	ENST00000780412.1	MIR100HG	140	-17.22	140	-17.22	6712	23	858	651
hsa-miR-215-3p	ENSG00000255248	ENST00000780411.1	MIR100HG	140	-17.22	140	-17.22	6713	23	819	612
hsa-miR-215-3p	ENSG00000255248	ENST00000780399.1	MIR100HG	140	-17.22	140	-17.22	6714	23	1077	870
hsa-miR-215-3p	ENSG00000255248	ENST00000780478.1	MIR100HG	170	-23.2	170	-23.2	6715	23	1738	1123
hsa-miR-215-3p	ENSG00000255248	ENST00000647967.2	MIR100HG	286	-29.2	144	-15.54	6718	23	3289	2978
hsa-miR-215-3p	ENSG00000255248	ENST00000780436.1	MIR100HG	142	-15.54	142	-15.54	6719	23	2277	1522
hsa-miR-215-3p	ENSG00000255248	ENST00000656387.3	MIR100HG	142	-15.54	142	-15.54	6720	23	1784	1648
hsa-miR-215-3p	ENSG00000255248	ENST00000669993.2	MIR100HG	148	-13.68	148	-13.68	6784	23	1326	375
hsa-miR-215-3p	ENSG00000258325	ENST00000839365.1	ITFG2-AS1	159	-21.27	159	-21.27	6786	23	664	107
hsa-miR-215-3p	ENSG00000258325	ENST00000839358.1	ITFG2-AS1	159	-21.27	159	-21.27	6787	23	906	349
hsa-miR-215-3p	ENSG00000258325	ENST00000839357.1	ITFG2-AS1	159	-21.27	159	-21.27	6788	23	998	441
hsa-miR-215-3p	ENSG00000258325	ENST00000715729.1	ITFG2-AS1	159	-21.27	159	-21.27	6789	23	1053	496
hsa-miR-215-3p	ENSG00000258325	ENST00000545526.2	ITFG2-AS1	159	-21.27	159	-21.27	6790	23	1538	981
hsa-miR-215-3p	ENSG00000258325	ENST00000839359.1	ITFG2-AS1	159	-21.27	159	-21.27	6791	23	724	170
hsa-miR-215-3p	ENSG00000258325	ENST00000839341.1	ITFG2-AS1	159	-21.27	159	-21.27	6792	23	834	280
hsa-miR-215-3p	ENSG00000258325	ENST00000839340.1	ITFG2-AS1	159	-21.27	159	-21.27	6793	23	1247	693
hsa-miR-215-3p	ENSG00000258325	ENST00000839348.1	ITFG2-AS1	159	-21.27	159	-21.27	6794	23	820	270
hsa-miR-215-3p	ENSG00000258325	ENST00000501371.5	ITFG2-AS1	150	-19.5	150	-19.5	6795	23	2191	730
hsa-miR-215-3p	ENSG00000258325	ENST00000715730.1	ITFG2-AS1	147	-24.67	147	-24.67	6798	23	1258	1213
hsa-miR-215-3p	ENSG00000258325	ENST00000715731.1	ITFG2-AS1	147	-24.67	147	-24.67	6807	23	2165	857
hsa-miR-215-3p	ENSG00000258325	ENST00000839355.1	ITFG2-AS1	147	-24.67	147	-24.67	6808	23	1641	335
hsa-miR-215-3p	ENSG00000258325	ENST00000839354.1	ITFG2-AS1	147	-24.67	147	-24.67	6809	23	1574	268
hsa-miR-215-3p	ENSG00000258325	ENST00000839353.1	ITFG2-AS1	147	-24.67	147	-24.67	6810	23	1877	571
hsa-miR-215-3p	ENSG00000258325	ENST00000839352.1	ITFG2-AS1	147	-24.67	147	-24.67	6811	23	1589	283
hsa-miR-215-3p	ENSG00000258325	ENST00000839349.1	ITFG2-AS1	147	-24.67	147	-24.67	6812	23	2040	734
hsa-miR-215-3p	ENSG00000258325	ENST00000839351.1	ITFG2-AS1	147	-24.67	147	-24.67	6813	23	1750	446
hsa-miR-215-3p	ENSG00000258325	ENST00000540093.2	ITFG2-AS1	147	-24.67	147	-24.67	6814	23	630	599
hsa-miR-215-3p	ENSG00000258325	ENST00000839366.1	ITFG2-AS1	140	-16.95	140	-16.95	6828	23	673	352
hsa-miR-215-3p	ENSG00000255794	ENST00000655366.1	RMST	145	-13.63	145	-13.63	6847	23	859	830
hsa-miR-215-3p	ENSG00000255794	ENST00000667445.2	RMST	145	-16.25	145	-16.25	6854	23	2490	1127
hsa-miR-215-3p	ENSG00000255794	ENST00000774543.1	RMST	140	-10.29	140	-10.29	6855	23	2148	1654
hsa-miR-215-3p	ENSG00000255794	ENST00000689144.1	RMST	140	-10.29	140	-10.29	6860	23	2218	1722
hsa-miR-215-3p	ENSG00000255794	ENST00000774544.1	RMST	140	-10.29	140	-10.29	6865	23	2063	1569
hsa-miR-215-3p	ENSG00000255794	ENST00000657936.1	RMST	140	-10.29	140	-10.29	6866	23	2210	1741
hsa-miR-215-3p	ENSG00000255794	ENST00000658877.1	RMST	145	-16.25	145	-16.25	6870	23	3444	1000
hsa-miR-215-3p	ENSG00000255794	ENST00000774545.1	RMST	140	-10.29	140	-10.29	6871	23	2311	1815
hsa-miR-215-3p	ENSG00000255794	ENST00000541282.5	RMST	140	-10.29	140	-10.29	6875	23	2099	1604
hsa-miR-215-3p	ENSG00000255794	ENST00000662772.1	RMST	140	-10.29	140	-10.29	6876	23	2122	1640
hsa-miR-215-3p	ENSG00000255794	ENST00000774546.1	RMST	140	-10.29	140	-10.29	6889	23	2454	1962
hsa-miR-215-3p	ENSG00000255794	ENST00000666798.2	RMST	140	-10.29	140	-10.29	6890	23	2564	2068
hsa-miR-215-3p	ENSG00000255794	ENST00000687746.1	RMST	140	-10.29	140	-10.29	6895	23	2480	1987
hsa-miR-215-3p	ENSG00000255794	ENST00000774548.1	RMST	140	-10.29	140	-10.29	6899	23	2122	1628
hsa-miR-215-3p	ENSG00000273784	ENST00000740506.1	AL137058.2	143	-13.15	143	-13.15	6913	23	1411	789
hsa-miR-215-3p	ENSG00000273784	ENST00000740500.1	AL137058.2	143	-13.15	143	-13.15	6914	23	1298	770
hsa-miR-215-3p	ENSG00000273784	ENST00000740508.1	AL137058.2	143	-13.15	143	-13.15	6919	23	948	601
hsa-miR-215-3p	ENSG00000273784	ENST00000740515.1	AL137058.2	143	-13.15	143	-13.15	6922	23	1501	805
hsa-miR-215-3p	ENSG00000273784	ENST00000740512.1	AL137058.2	143	-13.15	143	-13.15	6923	23	1180	805
hsa-miR-215-3p	ENSG00000273784	ENST00000740522.1	AL137058.2	143	-13.15	143	-13.15	6928	23	1200	698
hsa-miR-215-3p	ENSG00000273784	ENST00000740525.1	AL137058.2	143	-13.15	143	-13.15	6934	23	1357	999
hsa-miR-215-3p	ENSG00000273784	ENST00000740518.1	AL137058.2	143	-13.15	143	-13.15	6935	23	1362	671
hsa-miR-215-3p	ENSG00000273784	ENST00000683187.1	AL137058.2	156	-26.23	156	-26.23	6939	23	2158	1866
hsa-miR-215-3p	ENSG00000260830	ENST00000839891.1	AL135744.1	143	-16.72	143	-16.72	6974	23	874	614
hsa-miR-215-3p	ENSG00000260830	ENST00000839892.1	AL135744.1	143	-16.72	143	-16.72	6975	23	867	631
hsa-miR-215-3p	ENSG00000255571	ENST00000536780.6	MIR9-3HG	140	-14.11	140	-14.11	7002	23	4778	2638
hsa-miR-215-3p	ENSG00000255571	ENST00000654171.1	MIR9-3HG	140	-14.11	140	-14.11	7003	23	4350	2212
hsa-miR-215-3p	ENSG00000255571	ENST00000657897.1	MIR9-3HG	140	-14.11	140	-14.11	7005	23	4308	2171
hsa-miR-215-3p	ENSG00000255571	ENST00000661040.1	MIR9-3HG	140	-14.11	140	-14.11	7006	23	4092	1955
hsa-miR-215-3p	ENSG00000255571	ENST00000654184.1	MIR9-3HG	140	-14.11	140	-14.11	7007	23	4201	2063
hsa-miR-215-3p	ENSG00000255571	ENST00000658194.1	MIR9-3HG	283	-31.41	143	-17.3	7008	23	4266	432
hsa-miR-215-3p	ENSG00000255571	ENST00000661036.1	MIR9-3HG	140	-14.11	140	-14.11	7009	23	4225	2088
hsa-miR-215-3p	ENSG00000255571	ENST00000659235.1	MIR9-3HG	140	-14.11	140	-14.11	7010	23	4269	2132
hsa-miR-215-3p	ENSG00000255571	ENST00000669499.1	MIR9-3HG	140	-14.11	140	-14.11	7011	23	3818	1681
hsa-miR-215-3p	ENSG00000255571	ENST00000654079.1	MIR9-3HG	140	-14.11	140	-14.11	7012	23	4019	1882
hsa-miR-215-3p	ENSG00000255571	ENST00000670779.1	MIR9-3HG	140	-14.11	140	-14.11	7013	23	3960	1820
hsa-miR-215-3p	ENSG00000255571	ENST00000658764.1	MIR9-3HG	140	-14.11	140	-14.11	7014	23	4175	2038
hsa-miR-215-3p	ENSG00000255571	ENST00000666816.1	MIR9-3HG	140	-14.11	140	-14.11	7022	23	4053	1916
hsa-miR-215-3p	ENSG00000255571	ENST00000658770.1	MIR9-3HG	140	-14.11	140	-14.11	7023	23	3971	1834
hsa-miR-215-3p	ENSG00000255571	ENST00000667285.1	MIR9-3HG	140	-14.11	140	-14.11	7025	23	1889	1768
hsa-miR-215-3p	ENSG00000255571	ENST00000668524.1	MIR9-3HG	140	-14.11	140	-14.11	7026	23	1971	1850
hsa-miR-215-3p	ENSG00000255571	ENST00000558754.6	MIR9-3HG	140	-14.11	140	-14.11	7033	23	2759	2311
hsa-miR-215-3p	ENSG00000255571	ENST00000669098.1	MIR9-3HG	140	-14.11	140	-14.11	7034	23	5427	3290
hsa-miR-215-3p	ENSG00000255571	ENST00000538734.7	MIR9-3HG	140	-14.11	140	-14.11	7036	23	1867	1746
hsa-miR-215-3p	ENSG00000255571	ENST00000669645.1	MIR9-3HG	140	-14.11	140	-14.11	7037	23	1904	1788
hsa-miR-215-3p	ENSG00000255571	ENST00000660601.1	MIR9-3HG	140	-14.11	140	-14.11	7038	23	2033	1912
hsa-miR-215-3p	ENSG00000255571	ENST00000660922.1	MIR9-3HG	140	-14.11	140	-14.11	7039	23	1827	1710
hsa-miR-215-3p	ENSG00000255571	ENST00000670238.1	MIR9-3HG	140	-14.11	140	-14.11	7040	23	1994	1875
hsa-miR-215-3p	ENSG00000255571	ENST00000546186.3	MIR9-3HG	140	-14.11	140	-14.11	7041	23	1746	1680
hsa-miR-215-3p	ENSG00000255571	ENST00000662136.1	MIR9-3HG	140	-14.11	140	-14.11	7047	23	1838	1728
hsa-miR-215-3p	ENSG00000255571	ENST00000671075.1	MIR9-3HG	283	-31.41	143	-17.3	7053	23	5094	1179
hsa-miR-215-3p	ENSG00000255571	ENST00000663717.1	MIR9-3HG	283	-31.41	143	-17.3	7054	23	5607	932
hsa-miR-215-3p	ENSG00000255571	ENST00000671447.1	MIR9-3HG	283	-31.41	143	-17.3	7055	23	4989	311
hsa-miR-215-3p	ENSG00000260260	ENST00000563192.3	SNHG19	147	-17.21	147	-17.21	7093	23	418	3
hsa-miR-215-3p	ENSG00000260260	ENST00000686899.3	SNHG19	147	-17.21	147	-17.21	7094	23	879	248
hsa-miR-215-3p	ENSG00000260944	ENST00000809056.1	FOXC2-AS1	140	-19.38	140	-19.38	7103	23	803	45
hsa-miR-215-3p	ENSG00000260944	ENST00000809057.1	FOXC2-AS1	140	-19.38	140	-19.38	7110	23	322	27
hsa-miR-215-3p	ENSG00000261327	ENST00000562705.3	AC134312.5	149	-15.29	149	-15.29	7114	23	2397	1486
hsa-miR-215-3p	ENSG00000261327	ENST00000768717.1	AC134312.5	149	-15.29	149	-15.29	7115	23	1686	787
hsa-miR-215-3p	ENSG00000261327	ENST00000768714.1	AC134312.5	149	-15.29	149	-15.29	7116	23	1921	1022
hsa-miR-215-3p	ENSG00000261327	ENST00000661363.2	AC134312.5	149	-15.29	149	-15.29	7117	23	2235	1338
hsa-miR-215-3p	ENSG00000261327	ENST00000568031.2	AC134312.5	149	-15.29	149	-15.29	7118	23	2277	1387
hsa-miR-215-3p	ENSG00000261327	ENST00000768715.1	AC134312.5	149	-15.29	149	-15.29	7119	23	1873	1368
hsa-miR-215-3p	ENSG00000261327	ENST00000768718.1	AC134312.5	149	-15.29	149	-15.29	7120	23	1081	765
hsa-miR-215-3p	ENSG00000261327	ENST00000768716.1	AC134312.5	149	-15.29	149	-15.29	7121	23	1413	1097
hsa-miR-215-3p	ENSG00000261327	ENST00000768719.1	AC134312.5	149	-15.29	149	-15.29	7122	23	1157	844
hsa-miR-215-3p	ENSG00000266402	ENST00000776279.1	SNHG25	143	-17.92	143	-17.92	7146	23	561	154
hsa-miR-215-3p	ENSG00000267751	ENST00000590292.7	AC009005.1	147	-15.28	147	-15.28	7174	23	1187	759
hsa-miR-215-3p	ENSG00000267751	ENST00000588908.7	AC009005.1	147	-15.28	147	-15.28	7175	23	1063	640
hsa-miR-215-3p	ENSG00000267751	ENST00000588290.4	AC009005.1	147	-15.28	147	-15.28	7176	23	1196	832
hsa-miR-215-3p	ENSG00000267751	ENST00000589457.5	AC009005.1	147	-15.28	147	-15.28	7177	23	739	703
hsa-miR-215-3p	ENSG00000268670	ENST00000600056.1	AC016586.1	142	-22.22	142	-22.22	7187	23	684	321
hsa-miR-215-3p	ENSG00000267519	ENST00000587762.2	AC020916.1	151	-14.56	151	-14.56	7272	23	19049	10201
hsa-miR-215-3p	ENSG00000214049	ENST00000644567.3	UCA1	143	-15.41	143	-15.41	7276	23	2638	2585
hsa-miR-215-3p	ENSG00000214049	ENST00000718453.1	UCA1	143	-15.41	143	-15.41	7277	23	7791	7738
hsa-miR-215-3p	ENSG00000214049	ENST00000645764.2	UCA1	143	-15.41	143	-15.41	7278	23	2001	1956
hsa-miR-215-3p	ENSG00000214049	ENST00000644174.2	UCA1	143	-15.41	143	-15.41	7279	23	2688	2635
hsa-miR-215-3p	ENSG00000214049	ENST00000397381.7	UCA1	143	-15.41	143	-15.41	7287	23	2184	2144
hsa-miR-215-3p	ENSG00000214049	ENST00000644796.3	UCA1	143	-15.41	143	-15.41	7294	23	1320	1270
hsa-miR-215-3p	ENSG00000214049	ENST00000642440.3	UCA1	143	-15.41	143	-15.41	7295	23	1120	1066
hsa-miR-215-3p	ENSG00000214049	ENST00000644400.2	UCA1	143	-15.41	143	-15.41	7298	23	1707	1678
hsa-miR-215-3p	ENSG00000214049	ENST00000666830.2	UCA1	143	-15.41	143	-15.41	7303	23	1921	1875
hsa-miR-215-3p	ENSG00000205181	ENST00000661996.1	LINC00654	153	-21.46	153	-21.46	7347	23	809	506
hsa-miR-215-3p	ENSG00000205181	ENST00000650928.2	LINC00654	153	-21.46	153	-21.46	7348	23	1861	1558
hsa-miR-215-3p	ENSG00000205181	ENST00000794815.1	LINC00654	153	-21.46	153	-21.46	7349	23	911	610
hsa-miR-215-3p	ENSG00000237767	ENST00000669808.2	LINC01370	291	-34.18	150	-18.89	7411	23	2591	892
hsa-miR-215-3p	ENSG00000237767	ENST00000445606.3	LINC01370	150	-18.89	150	-18.89	7412	23	1095	983
hsa-miR-215-3p	ENSG00000237767	ENST00000664271.2	LINC01370	290	-31.34	150	-18.89	7413	23	2512	2402
hsa-miR-215-3p	ENSG00000237767	ENST00000670996.2	LINC01370	150	-18.89	150	-18.89	7414	23	1393	480
hsa-miR-215-3p	ENSG00000237767	ENST00000665038.2	LINC01370	150	-18.89	150	-18.89	7415	23	2084	849
hsa-miR-215-3p	ENSG00000237767	ENST00000722250.1	LINC01370	150	-18.89	150	-18.89	7416	23	509	390
hsa-miR-215-3p	ENSG00000237767	ENST00000722243.1	LINC01370	150	-18.89	150	-18.89	7417	23	1718	390
hsa-miR-215-3p	ENSG00000237767	ENST00000432633.2	LINC01370	150	-18.89	150	-18.89	7419	23	1017	909
hsa-miR-215-3p	ENSG00000237767	ENST00000667567.2	LINC01370	291	-34.18	150	-18.89	7423	23	2177	820
hsa-miR-215-3p	ENSG00000237767	ENST00000722244.1	LINC01370	150	-18.89	150	-18.89	7424	23	1611	376
hsa-miR-215-3p	ENSG00000237767	ENST00000722251.1	LINC01370	150	-18.89	150	-18.89	7426	23	651	540
hsa-miR-215-3p	ENSG00000237767	ENST00000722248.1	LINC01370	150	-18.89	150	-18.89	7427	23	1531	428
hsa-miR-215-3p	ENSG00000237767	ENST00000722245.1	LINC01370	150	-18.89	150	-18.89	7429	23	1934	699
hsa-miR-215-3p	ENSG00000237767	ENST00000701153.2	LINC01370	150	-18.89	150	-18.89	7431	23	1056	691
hsa-miR-215-3p	ENSG00000237767	ENST00000668047.2	LINC01370	150	-18.89	150	-18.89	7432	23	1645	410
hsa-miR-215-3p	ENSG00000237767	ENST00000722246.1	LINC01370	150	-18.89	150	-18.89	7436	23	1736	398
hsa-miR-215-3p	ENSG00000237767	ENST00000722252.1	LINC01370	150	-18.89	150	-18.89	7437	23	382	272
hsa-miR-215-3p	ENSG00000237767	ENST00000669216.1	LINC01370	150	-18.89	150	-18.89	7441	23	1196	1091
hsa-miR-215-3p	ENSG00000174403	ENST00000788149.1	MIR1-1HG-AS1	152	-21.52	152	-21.52	7443	23	2418	186
hsa-miR-215-3p	ENSG00000174403	ENST00000475015.6	MIR1-1HG-AS1	296	-40.6	150	-21.93	7444	23	3366	2647
hsa-miR-215-3p	ENSG00000174403	ENST00000788150.1	MIR1-1HG-AS1	302	-43.45	152	-21.93	7445	23	2380	192
hsa-miR-215-3p	ENSG00000174403	ENST00000686642.1	MIR1-1HG-AS1	150	-21.93	150	-21.93	7446	23	3337	3017
hsa-miR-215-3p	ENSG00000174403	ENST00000788156.1	MIR1-1HG-AS1	150	-21.93	150	-21.93	7447	23	1031	712
hsa-miR-215-3p	ENSG00000174403	ENST00000412495.5	MIR1-1HG-AS1	150	-21.93	150	-21.93	7448	23	2302	2160
hsa-miR-215-3p	ENSG00000174403	ENST00000788154.1	MIR1-1HG-AS1	152	-21.52	152	-21.52	7455	23	1692	220
hsa-miR-215-3p	ENSG00000174403	ENST00000436101.1	MIR1-1HG-AS1	152	-21.52	152	-21.52	7456	23	761	294
hsa-miR-215-3p	ENSG00000174403	ENST00000788155.1	MIR1-1HG-AS1	152	-21.52	152	-21.52	7458	23	858	214
hsa-miR-215-3p	ENSG00000174403	ENST00000788164.1	MIR1-1HG-AS1	152	-21.52	152	-21.52	7460	23	965	355
hsa-miR-215-3p	ENSG00000174403	ENST00000788161.1	MIR1-1HG-AS1	152	-21.52	152	-21.52	7461	23	530	203
hsa-miR-215-3p	ENSG00000174403	ENST00000788163.1	MIR1-1HG-AS1	152	-21.52	152	-21.52	7463	23	577	203
hsa-miR-215-3p	ENSG00000174403	ENST00000788160.1	MIR1-1HG-AS1	152	-21.52	152	-21.52	7464	23	967	357
hsa-miR-215-3p	ENSG00000174403	ENST00000788158.1	MIR1-1HG-AS1	152	-21.52	152	-21.52	7466	23	581	213
hsa-miR-215-3p	ENSG00000174403	ENST00000788167.1	MIR1-1HG-AS1	152	-21.52	152	-21.52	7467	23	577	210
hsa-miR-215-3p	ENSG00000174403	ENST00000788159.1	MIR1-1HG-AS1	152	-21.52	152	-21.52	7468	23	921	313
hsa-miR-215-3p	ENSG00000174403	ENST00000788169.1	MIR1-1HG-AS1	152	-21.52	152	-21.52	7469	23	544	173
hsa-miR-215-3p	ENSG00000260924	ENST00000565162.4	LINC01311	145	-17.24	145	-17.24	7490	23	2716	908
hsa-miR-215-3p	ENSG00000260924	ENST00000804548.1	LINC01311	145	-17.24	145	-17.24	7491	23	1008	459
hsa-miR-215-3p	ENSG00000225783	ENST00000717177.1	MIAT	140	-13.67	140	-13.67	7511	23	1199	81
hsa-miR-215-3p	ENSG00000225783	ENST00000717178.1	MIAT	140	-13.67	140	-13.67	7512	23	988	79
hsa-miR-215-3p	ENSG00000225783	ENST00000436238.6	MIAT	140	-8.4	140	-8.4	7513	23	1236	1
hsa-miR-215-3p	ENSG00000225783	ENST00000616469.4	MIAT	147	-18.71	147	-18.71	7523	23	10069	5397
hsa-miR-215-3p	ENSG00000225783	ENST00000613780.4	MIAT	147	-18.71	147	-18.71	7529	23	10143	5471
hsa-miR-215-3p	ENSG00000225783	ENST00000616213.4	MIAT	147	-18.71	147	-18.71	7530	23	9943	5271
hsa-miR-215-3p	ENSG00000225783	ENST00000620145.6	MIAT	147	-18.71	147	-18.71	7542	23	10004	5329
hsa-miR-215-3p	ENSG00000279182	ENST00000623684.1	CR559946.2	142	-15.53	142	-15.53	7572	23	991	138
hsa-miR-215-3p	ENSG00000281849	ENST00000627721.4	AL732314.6	294	-33.25	147	-16.85	7575	23	1356	608
hsa-miR-215-3p	ENSG00000281849	ENST00000717455.1	AL732314.6	156	-22.68	156	-22.68	7576	23	1871	645
hsa-miR-215-3p	ENSG00000281849	ENST00000717456.1	AL732314.6	301	-36.12	156	-22.68	7577	23	2543	875
hsa-miR-215-3p	ENSG00000281849	ENST00000717457.1	AL732314.6	588	-66.5	147	-16.85	7578	23	1543	12
hsa-miR-215-3p	ENSG00000281849	ENST00000717458.1	AL732314.6	156	-22.68	156	-22.68	7579	23	1259	685
hsa-miR-215-3p	ENSG00000281849	ENST00000717459.1	AL732314.6	147	-20.47	147	-20.47	7580	23	766	47
hsa-miR-215-3p	ENSG00000269993	ENST00000602313.2	KC877982.1	143	-14.79	143	-14.79	7607	23	1245	831
hsa-miR-122-5p	ENSG00000225880	ENST00000447954.3	LINC00115	158	-23.72	158	-23.72	7621	22	1054	989
hsa-miR-122-5p	ENSG00000225880	ENST00000745229.1	LINC00115	158	-23.72	158	-23.72	7622	22	905	841
hsa-miR-122-5p	ENSG00000225880	ENST00000473798.3	LINC00115	140	-17.46	140	-17.46	7695	22	3602	1378
hsa-miR-122-5p	ENSG00000225880	ENST00000745542.1	LINC00115	140	-17.46	140	-17.46	7696	22	997	744
hsa-miR-122-5p	ENSG00000225880	ENST00000745544.1	LINC00115	140	-17.46	140	-17.46	7697	22	1097	847
hsa-miR-122-5p	ENSG00000225880	ENST00000745545.1	LINC00115	140	-17.46	140	-17.46	7698	22	909	667
hsa-miR-122-5p	ENSG00000225880	ENST00000745543.1	LINC00115	140	-17.46	140	-17.46	7699	22	1361	1119
hsa-miR-122-5p	ENSG00000177133	ENST00000818107.1	LINC00982	148	-19.42	148	-19.42	7739	22	1542	17
hsa-miR-122-5p	ENSG00000238140	ENST00000424246.1	AC104170.2	143	-19.36	143	-19.36	7752	22	678	179
hsa-miR-122-5p	ENSG00000116652	ENST00000371086.3	DLEU2L	140	-16.71	140	-16.71	7753	22	3555	2572
hsa-miR-122-5p	ENSG00000235407	ENST00000457402.2	CYMP-AS1	141	-19.26	141	-19.26	7778	22	2374	610
hsa-miR-122-5p	ENSG00000231064	ENST00000730305.1	AC234582.1	284	-37.78	142	-20.25	7787	22	1400	1072
hsa-miR-122-5p	ENSG00000231064	ENST00000701341.2	AC234582.1	284	-37.78	142	-20.25	7788	22	1510	855
hsa-miR-122-5p	ENSG00000231064	ENST00000702699.2	AC234582.1	284	-37.78	142	-20.25	7789	22	1106	677
hsa-miR-122-5p	ENSG00000231064	ENST00000447623.4	AC234582.1	284	-37.78	142	-20.25	7790	22	1259	828
hsa-miR-122-5p	ENSG00000231064	ENST00000730302.1	AC234582.1	284	-37.78	142	-20.25	7791	22	1047	616
hsa-miR-122-5p	ENSG00000231064	ENST00000730303.1	AC234582.1	284	-37.78	142	-20.25	7792	22	1322	891
hsa-miR-122-5p	ENSG00000231064	ENST00000730304.1	AC234582.1	284	-37.78	142	-20.25	7793	22	1263	832
hsa-miR-122-5p	ENSG00000231064	ENST00000730291.1	AC234582.1	284	-37.78	142	-20.25	7795	22	1270	616
hsa-miR-122-5p	ENSG00000231064	ENST00000730312.1	AC234582.1	284	-37.78	142	-20.25	7800	22	1100	777
hsa-miR-122-5p	ENSG00000231064	ENST00000702425.1	AC234582.1	284	-37.78	142	-20.25	7801	22	725	397
hsa-miR-122-5p	ENSG00000231064	ENST00000687157.2	AC234582.1	284	-37.78	142	-20.25	7802	22	1108	779
hsa-miR-122-5p	ENSG00000231064	ENST00000730307.1	AC234582.1	284	-37.78	142	-20.25	7803	22	1112	783
hsa-miR-122-5p	ENSG00000231064	ENST00000730308.1	AC234582.1	284	-37.78	142	-20.25	7804	22	1421	1092
hsa-miR-122-5p	ENSG00000231064	ENST00000730309.1	AC234582.1	284	-37.78	142	-20.25	7805	22	1041	712
hsa-miR-122-5p	ENSG00000231064	ENST00000702905.2	AC234582.1	284	-37.78	142	-20.25	7806	22	1172	842
hsa-miR-122-5p	ENSG00000231064	ENST00000730306.1	AC234582.1	284	-37.78	142	-20.25	7807	22	1216	886
hsa-miR-122-5p	ENSG00000231064	ENST00000436772.3	AC234582.1	284	-37.78	142	-20.25	7808	22	992	660
hsa-miR-122-5p	ENSG00000231064	ENST00000702000.1	AC234582.1	284	-37.78	142	-20.25	7810	22	1409	611
hsa-miR-122-5p	ENSG00000231064	ENST00000422665.2	AC234582.1	284	-37.78	142	-20.25	7811	22	1433	783
hsa-miR-122-5p	ENSG00000231064	ENST00000702879.1	AC234582.1	284	-37.78	142	-20.25	7812	22	1314	664
hsa-miR-122-5p	ENSG00000231064	ENST00000730297.1	AC234582.1	284	-37.78	142	-20.25	7813	22	1261	611
hsa-miR-122-5p	ENSG00000231064	ENST00000730292.1	AC234582.1	284	-37.78	142	-20.25	7814	22	1634	831
hsa-miR-122-5p	ENSG00000231064	ENST00000730293.1	AC234582.1	284	-37.78	142	-20.25	7815	22	1544	890
hsa-miR-122-5p	ENSG00000231064	ENST00000730294.1	AC234582.1	284	-37.78	142	-20.25	7816	22	1098	444
hsa-miR-122-5p	ENSG00000231064	ENST00000685687.1	AC234582.1	284	-37.78	142	-20.25	7817	22	1632	827
hsa-miR-122-5p	ENSG00000231064	ENST00000730289.1	AC234582.1	284	-37.78	142	-20.25	7818	22	1487	831
hsa-miR-122-5p	ENSG00000231064	ENST00000730290.1	AC234582.1	284	-37.78	142	-20.25	7819	22	1104	448
hsa-miR-122-5p	ENSG00000231064	ENST00000690090.1	AC234582.1	284	-37.78	142	-20.25	7821	22	1284	956
hsa-miR-122-5p	ENSG00000231064	ENST00000730295.1	AC234582.1	284	-37.78	142	-20.25	7822	22	1245	442
hsa-miR-122-5p	ENSG00000231064	ENST00000730313.1	AC234582.1	284	-37.78	142	-20.25	7824	22	829	512
hsa-miR-122-5p	ENSG00000231064	ENST00000730311.1	AC234582.1	284	-37.78	142	-20.25	7825	22	1159	831
hsa-miR-122-5p	ENSG00000231064	ENST00000730310.1	AC234582.1	284	-37.78	142	-20.25	7826	22	1413	1084
hsa-miR-122-5p	ENSG00000231064	ENST00000702560.1	AC234582.1	284	-37.78	142	-20.25	7827	22	1691	823
hsa-miR-122-5p	ENSG00000231064	ENST00000702269.1	AC234582.1	284	-37.78	142	-20.25	7828	22	1365	715
hsa-miR-122-5p	ENSG00000231064	ENST00000730299.1	AC234582.1	284	-37.78	142	-20.25	7829	22	1532	882
hsa-miR-122-5p	ENSG00000231064	ENST00000730296.1	AC234582.1	284	-37.78	142	-20.25	7831	22	1459	656
hsa-miR-122-5p	ENSG00000231064	ENST00000730314.1	AC234582.1	284	-37.78	142	-20.25	7832	22	890	561
hsa-miR-122-5p	ENSG00000231064	ENST00000453136.6	AC234582.1	284	-37.78	142	-20.25	7833	22	1154	355
hsa-miR-122-5p	ENSG00000231064	ENST00000702355.1	AC234582.1	284	-37.78	142	-20.25	7835	22	1402	749
hsa-miR-122-5p	ENSG00000231064	ENST00000730301.1	AC234582.1	284	-37.78	142	-20.25	7836	22	1503	704
hsa-miR-122-5p	ENSG00000231064	ENST00000730286.1	AC234582.1	284	-37.78	142	-20.25	7837	22	704	343
hsa-miR-122-5p	ENSG00000231064	ENST00000454348.2	AC234582.1	284	-37.78	142	-20.25	7838	22	2503	2174
hsa-miR-122-5p	ENSG00000125462	ENST00000476966.6	C1orf61	143	-19.05	143	-19.05	8018	22	2704	1414
hsa-miR-122-5p	ENSG00000234425	ENST00000846350.1	AL138930.1	152	-20.28	152	-20.28	8042	22	455	123
hsa-miR-122-5p	ENSG00000215808	ENST00000649681.1	LINC01139	142	-14.31	142	-14.31	8053	22	5583	2447
hsa-miR-122-5p	ENSG00000272994	ENST00000610036.2	AC012360.3	150	-17.88	150	-17.88	8132	22	3575	582
hsa-miR-122-5p	ENSG00000272994	ENST00000729451.1	AC012360.3	150	-17.88	150	-17.88	8133	22	2003	344
hsa-miR-122-5p	ENSG00000228857	ENST00000827895.1	AC104653.1	166	-23.57	166	-23.57	8139	22	1335	678
hsa-miR-122-5p	ENSG00000228857	ENST00000827873.1	AC104653.1	160	-21.29	160	-21.29	8151	22	1442	1299
hsa-miR-122-5p	ENSG00000230838	ENST00000768239.1	LINC01614	144	-18.27	144	-18.27	8193	22	2088	970
hsa-miR-122-5p	ENSG00000230838	ENST00000768240.1	LINC01614	144	-18.27	144	-18.27	8194	22	2138	1020
hsa-miR-122-5p	ENSG00000230838	ENST00000415479.3	LINC01614	144	-18.27	144	-18.27	8195	22	2294	1173
hsa-miR-122-5p	ENSG00000230838	ENST00000768241.1	LINC01614	144	-18.27	144	-18.27	8196	22	1978	863
hsa-miR-122-5p	ENSG00000269068	ENST00000793735.1	AC009955.4	155	-25.13	155	-25.13	8198	22	1129	924
hsa-miR-122-5p	ENSG00000269068	ENST00000597192.1	AC009955.4	155	-25.13	155	-25.13	8199	22	544	341
hsa-miR-122-5p	ENSG00000272434	ENST00000607245.1	AC137630.3	145	-19.75	145	-19.75	8201	22	391	275
hsa-miR-122-5p	ENSG00000272434	ENST00000820609.1	AC137630.3	145	-19.75	145	-19.75	8202	22	496	58
hsa-miR-122-5p	ENSG00000229334	ENST00000447139.3	AC046143.1	144	-21.74	144	-21.74	8217	22	998	402
hsa-miR-122-5p	ENSG00000242686	ENST00000599030.1	AC107464.1	152	-25.41	152	-25.41	8219	22	637	164
hsa-miR-122-5p	ENSG00000242686	ENST00000468356.3	AC107464.1	152	-25.41	152	-25.41	8220	22	2120	1751
hsa-miR-122-5p	ENSG00000250986	ENST00000511928.1	AC141928.1	160	-23.64	160	-23.64	8222	22	4525	2974
hsa-miR-122-5p	ENSG00000272677	ENST00000609552.3	AC124016.1	146	-22.72	146	-22.72	8229	22	1465	33
hsa-miR-122-5p	ENSG00000271474	ENST00000605849.2	AC106881.1	154	-23.29	154	-23.29	8234	22	3534	52
hsa-miR-122-5p	ENSG00000246090	ENST00000757798.1	AP002026.1	143	-16.19	143	-16.19	8249	22	2009	1692
hsa-miR-122-5p	ENSG00000246090	ENST00000691990.1	AP002026.1	143	-16.19	143	-16.19	8254	22	1647	1386
hsa-miR-122-5p	ENSG00000246090	ENST00000757799.1	AP002026.1	143	-16.19	143	-16.19	8256	22	2240	1923
hsa-miR-122-5p	ENSG00000246090	ENST00000500358.6	AP002026.1	143	-16.19	143	-16.19	8264	22	4825	4508
hsa-miR-122-5p	ENSG00000246090	ENST00000661393.1	AP002026.1	143	-16.19	143	-16.19	8266	22	1910	1616
hsa-miR-122-5p	ENSG00000246090	ENST00000757800.1	AP002026.1	143	-16.19	143	-16.19	8285	22	1321	1007
hsa-miR-122-5p	ENSG00000246090	ENST00000757803.1	AP002026.1	143	-16.19	143	-16.19	8290	22	988	727
hsa-miR-122-5p	ENSG00000246090	ENST00000757804.1	AP002026.1	143	-16.19	143	-16.19	8292	22	752	491
hsa-miR-122-5p	ENSG00000246090	ENST00000757813.1	AP002026.1	143	-16.19	143	-16.19	8293	22	1002	683
hsa-miR-122-5p	ENSG00000246090	ENST00000757814.1	AP002026.1	143	-16.19	143	-16.19	8294	22	1289	968
hsa-miR-122-5p	ENSG00000246090	ENST00000757815.1	AP002026.1	143	-16.19	143	-16.19	8295	22	1229	908
hsa-miR-122-5p	ENSG00000246090	ENST00000757818.1	AP002026.1	143	-16.19	143	-16.19	8296	22	950	634
hsa-miR-122-5p	ENSG00000246090	ENST00000757816.1	AP002026.1	143	-16.19	143	-16.19	8297	22	1450	1131
hsa-miR-122-5p	ENSG00000246090	ENST00000757817.1	AP002026.1	143	-16.19	143	-16.19	8298	22	1507	1188
hsa-miR-122-5p	ENSG00000246090	ENST00000757820.1	AP002026.1	143	-16.19	143	-16.19	8299	22	1193	876
hsa-miR-122-5p	ENSG00000246090	ENST00000757821.1	AP002026.1	143	-16.19	143	-16.19	8300	22	704	387
hsa-miR-122-5p	ENSG00000246090	ENST00000757819.1	AP002026.1	143	-16.19	143	-16.19	8301	22	1193	874
hsa-miR-122-5p	ENSG00000246090	ENST00000757822.1	AP002026.1	143	-16.19	143	-16.19	8302	22	622	306
hsa-miR-122-5p	ENSG00000246090	ENST00000757827.1	AP002026.1	143	-16.19	143	-16.19	8303	22	1089	772
hsa-miR-122-5p	ENSG00000246090	ENST00000757823.1	AP002026.1	143	-16.19	143	-16.19	8304	22	1121	805
hsa-miR-122-5p	ENSG00000246090	ENST00000757824.1	AP002026.1	143	-16.19	143	-16.19	8305	22	1057	740
hsa-miR-122-5p	ENSG00000246090	ENST00000757825.1	AP002026.1	143	-16.19	143	-16.19	8306	22	1055	738
hsa-miR-122-5p	ENSG00000246090	ENST00000757826.1	AP002026.1	143	-16.19	143	-16.19	8307	22	879	562
hsa-miR-122-5p	ENSG00000246090	ENST00000757833.1	AP002026.1	143	-16.19	143	-16.19	8310	22	1101	780
hsa-miR-122-5p	ENSG00000246090	ENST00000757834.1	AP002026.1	143	-16.19	143	-16.19	8311	22	1323	1004
hsa-miR-122-5p	ENSG00000246090	ENST00000757839.1	AP002026.1	143	-16.19	143	-16.19	8312	22	1553	1298
hsa-miR-122-5p	ENSG00000246090	ENST00000757838.1	AP002026.1	143	-16.19	143	-16.19	8313	22	1317	1056
hsa-miR-122-5p	ENSG00000246090	ENST00000757836.1	AP002026.1	143	-16.19	143	-16.19	8314	22	1309	992
hsa-miR-122-5p	ENSG00000246090	ENST00000757835.1	AP002026.1	143	-16.19	143	-16.19	8315	22	1135	816
hsa-miR-122-5p	ENSG00000246090	ENST00000757837.1	AP002026.1	143	-16.19	143	-16.19	8316	22	1025	708
hsa-miR-122-5p	ENSG00000246090	ENST00000757844.1	AP002026.1	143	-16.19	143	-16.19	8317	22	1061	744
hsa-miR-122-5p	ENSG00000246090	ENST00000757845.1	AP002026.1	143	-16.19	143	-16.19	8318	22	1361	1060
hsa-miR-122-5p	ENSG00000246090	ENST00000509939.1	AP002026.1	143	-16.19	143	-16.19	8319	22	677	418
hsa-miR-122-5p	ENSG00000246090	ENST00000757873.1	AP002026.1	143	-16.19	143	-16.19	8320	22	780	461
hsa-miR-122-5p	ENSG00000246090	ENST00000757874.1	AP002026.1	143	-16.19	143	-16.19	8321	22	575	260
hsa-miR-122-5p	ENSG00000246090	ENST00000757876.1	AP002026.1	143	-16.19	143	-16.19	8322	22	464	209
hsa-miR-122-5p	ENSG00000251573	ENST00000717676.1	LINC02106	146	-19.43	146	-19.43	8417	22	1364	883
hsa-miR-122-5p	ENSG00000251573	ENST00000510349.2	LINC02106	146	-19.43	146	-19.43	8418	22	1103	624
hsa-miR-122-5p	ENSG00000251573	ENST00000717677.1	LINC02106	146	-19.43	146	-19.43	8419	22	810	331
hsa-miR-122-5p	ENSG00000251573	ENST00000747146.1	LINC02106	146	-19.43	146	-19.43	8420	22	865	388
hsa-miR-122-5p	ENSG00000251573	ENST00000747145.1	LINC02106	146	-19.43	146	-19.43	8421	22	905	428
hsa-miR-122-5p	ENSG00000251573	ENST00000717678.1	LINC02106	146	-19.43	146	-19.43	8422	22	1084	607
hsa-miR-122-5p	ENSG00000251573	ENST00000747144.1	LINC02106	146	-19.43	146	-19.43	8423	22	1062	592
hsa-miR-122-5p	ENSG00000251573	ENST00000747139.1	LINC02106	146	-19.43	146	-19.43	8424	22	1030	560
hsa-miR-122-5p	ENSG00000251573	ENST00000747147.1	LINC02106	160	-22.57	160	-22.57	8430	22	558	320
hsa-miR-122-5p	ENSG00000251573	ENST00000506534.3	LINC02106	160	-22.57	160	-22.57	8431	22	697	461
hsa-miR-122-5p	ENSG00000251573	ENST00000747150.1	LINC02106	160	-22.57	160	-22.57	8433	22	484	251
hsa-miR-122-5p	ENSG00000245526	ENST00000506041.2	LINC00461	140	-16.09	140	-16.09	8440	22	1626	537
hsa-miR-122-5p	ENSG00000245526	ENST00000715786.1	LINC00461	140	-16.09	140	-16.09	8441	22	1486	943
hsa-miR-122-5p	ENSG00000245526	ENST00000606189.1	LINC00461	140	-16.09	140	-16.09	8442	22	421	205
hsa-miR-122-5p	ENSG00000245526	ENST00000787111.1	LINC00461	140	-16.09	140	-16.09	8443	22	1014	802
hsa-miR-122-5p	ENSG00000245526	ENST00000669424.1	LINC00461	142	-15.76	142	-15.76	8453	22	8262	3181
hsa-miR-122-5p	ENSG00000245526	ENST00000670494.2	LINC00461	142	-15.76	142	-15.76	8454	22	7579	2564
hsa-miR-122-5p	ENSG00000245526	ENST00000664240.2	LINC00461	142	-15.76	142	-15.76	8455	22	6250	2667
hsa-miR-122-5p	ENSG00000245526	ENST00000662060.1	LINC00461	142	-15.76	142	-15.76	8456	22	5116	2514
hsa-miR-122-5p	ENSG00000245526	ENST00000665062.2	LINC00461	142	-15.76	142	-15.76	8457	22	4332	2657
hsa-miR-122-5p	ENSG00000245526	ENST00000665865.2	LINC00461	283	-39.15	142	-23.39	8458	22	4522	2852
hsa-miR-122-5p	ENSG00000245526	ENST00000787089.1	LINC00461	141	-22.85	141	-22.85	8467	22	1164	1
hsa-miR-122-5p	ENSG00000245526	ENST00000513805.7	LINC00461	141	-23.39	141	-23.39	8468	22	890	2
hsa-miR-122-5p	ENSG00000245526	ENST00000500197.6	LINC00461	141	-23.39	141	-23.39	8511	22	3381	2
hsa-miR-122-5p	ENSG00000245526	ENST00000505030.6	LINC00461	141	-23.39	141	-23.39	8512	22	3957	387
hsa-miR-122-5p	ENSG00000245526	ENST00000504246.6	LINC00461	142	-12.65	142	-12.65	8527	22	2621	917
hsa-miR-122-5p	ENSG00000245526	ENST00000692902.2	LINC00461	142	-25.32	142	-25.32	8535	22	1860	1038
hsa-miR-122-5p	ENSG00000271918	ENST00000606662.3	AC034236.2	142	-17.71	142	-17.71	8544	22	1649	584
hsa-miR-122-5p	ENSG00000278899	ENST00000623174.2	AL358852.1	142	-24.66	142	-24.66	8576	22	1280	458
hsa-miR-122-5p	ENSG00000270419	ENST00000604200.3	CAHM	144	-18.95	144	-18.95	8601	22	1815	849
hsa-miR-122-5p	ENSG00000270419	ENST00000816692.1	CAHM	144	-18.95	144	-18.95	8602	22	529	478
hsa-miR-122-5p	ENSG00000270419	ENST00000816693.1	CAHM	144	-18.95	144	-18.95	8603	22	444	397
hsa-miR-122-5p	ENSG00000270419	ENST00000816713.1	CAHM	144	-18.95	144	-18.95	8604	22	409	362
hsa-miR-122-5p	ENSG00000229533	ENST00000452700.1	AC003986.1	142	-18.77	142	-18.77	8643	22	1526	422
hsa-miR-122-5p	ENSG00000233429	ENST00000429611.7	HOTAIRM1	158	-23.39	158	-23.39	8646	22	722	340
hsa-miR-122-5p	ENSG00000233429	ENST00000425358.2	HOTAIRM1	158	-23.39	158	-23.39	8647	22	637	255
hsa-miR-122-5p	ENSG00000233429	ENST00000428939.3	HOTAIRM1	158	-23.39	158	-23.39	8648	22	889	334
hsa-miR-122-5p	ENSG00000228554	ENST00000435766.1	AC004837.2	145	-17.73	145	-17.73	8652	22	731	64
hsa-miR-122-5p	ENSG00000232415	ENST00000435932.3	ELN-AS1	140	-19.64	140	-19.64	8656	22	1227	1141
hsa-miR-122-5p	ENSG00000231764	ENST00000430027.3	DLX6-AS1	149	-20.62	149	-20.62	8657	22	15364	2845
hsa-miR-122-5p	ENSG00000231764	ENST00000659765.2	DLX6-AS1	149	-20.62	149	-20.62	8658	22	4722	2481
hsa-miR-122-5p	ENSG00000231764	ENST00000458352.5	DLX6-AS1	149	-20.62	149	-20.62	8659	22	5529	3319
hsa-miR-122-5p	ENSG00000231764	ENST00000656954.2	DLX6-AS1	149	-20.62	149	-20.62	8660	22	4413	2304
hsa-miR-122-5p	ENSG00000231764	ENST00000605417.6	DLX6-AS1	149	-20.62	149	-20.62	8661	22	3995	2039
hsa-miR-122-5p	ENSG00000231764	ENST00000841667.1	DLX6-AS1	149	-20.62	149	-20.62	8665	22	2487	1621
hsa-miR-122-5p	ENSG00000231764	ENST00000658043.1	DLX6-AS1	149	-20.62	149	-20.62	8668	22	3119	2306
hsa-miR-122-5p	ENSG00000231764	ENST00000654988.1	DLX6-AS1	149	-20.62	149	-20.62	8669	22	3001	2188
hsa-miR-122-5p	ENSG00000239569	ENST00000718398.1	KMT2E-AS1	155	-24.83	155	-24.83	8716	22	1763	1128
hsa-miR-122-5p	ENSG00000239569	ENST00000453666.2	KMT2E-AS1	155	-24.83	155	-24.83	8717	22	923	547
hsa-miR-122-5p	ENSG00000239569	ENST00000787479.1	KMT2E-AS1	155	-24.83	155	-24.83	8718	22	1234	1080
hsa-miR-122-5p	ENSG00000227199	ENST00000456775.1	ST7-AS1	141	-12.11	141	-12.11	8779	22	1889	1
hsa-miR-122-5p	ENSG00000230316	ENST00000424404.1	FEZF1-AS1	143	-18.3	143	-18.3	8782	22	679	1
hsa-miR-122-5p	ENSG00000254377	ENST00000671254.3	MIR124-2HG	287	-40.76	145	-22.43	8790	22	2168	1956
hsa-miR-122-5p	ENSG00000254377	ENST00000772506.1	MIR124-2HG	142	-18.33	142	-18.33	8791	22	1200	157
hsa-miR-122-5p	ENSG00000254377	ENST00000689669.3	MIR124-2HG	145	-22.43	145	-22.43	8812	22	2421	2150
hsa-miR-122-5p	ENSG00000284116	ENST00000809243.1	AL772307.1	142	-16.72	142	-16.72	8850	22	1749	988
hsa-miR-122-5p	ENSG00000284116	ENST00000809261.1	AL772307.1	142	-16.72	142	-16.72	8851	22	1031	796
hsa-miR-122-5p	ENSG00000284116	ENST00000809244.1	AL772307.1	142	-16.72	142	-16.72	8852	22	1511	1276
hsa-miR-122-5p	ENSG00000284116	ENST00000809442.1	AL772307.1	140	-17.22	140	-17.22	8874	22	887	699
hsa-miR-122-5p	ENSG00000204802	ENST00000377518.4	AL590399.1	142	-16.72	142	-16.72	8900	22	2784	1833
hsa-miR-122-5p	ENSG00000204802	ENST00000717374.1	AL590399.1	142	-16.72	142	-16.72	8906	22	1714	1233
hsa-miR-122-5p	ENSG00000204802	ENST00000429818.2	AL590399.1	142	-16.72	142	-16.72	8907	22	1566	1085
hsa-miR-122-5p	ENSG00000225383	ENST00000602763.7	SFTA1P	148	-22.13	148	-22.13	8948	22	653	555
hsa-miR-122-5p	ENSG00000225383	ENST00000660024.2	SFTA1P	148	-22.13	148	-22.13	8949	22	708	610
hsa-miR-122-5p	ENSG00000225383	ENST00000739713.1	SFTA1P	148	-22.13	148	-22.13	8950	22	430	333
hsa-miR-122-5p	ENSG00000225383	ENST00000634899.2	SFTA1P	148	-22.13	148	-22.13	8951	22	412	315
hsa-miR-122-5p	ENSG00000225383	ENST00000739712.1	SFTA1P	148	-22.13	148	-22.13	8952	22	433	336
hsa-miR-122-5p	ENSG00000225383	ENST00000665724.1	SFTA1P	148	-22.13	148	-22.13	8953	22	570	473
hsa-miR-122-5p	ENSG00000225383	ENST00000656654.1	SFTA1P	148	-22.13	148	-22.13	8954	22	570	473
hsa-miR-122-5p	ENSG00000225383	ENST00000653216.1	SFTA1P	148	-22.13	148	-22.13	8955	22	686	589
hsa-miR-122-5p	ENSG00000225383	ENST00000446372.3	SFTA1P	148	-22.13	148	-22.13	8956	22	710	613
hsa-miR-122-5p	ENSG00000225383	ENST00000739711.1	SFTA1P	148	-22.13	148	-22.13	8957	22	665	568
hsa-miR-122-5p	ENSG00000225383	ENST00000739710.1	SFTA1P	148	-22.13	148	-22.13	8958	22	557	460
hsa-miR-122-5p	ENSG00000225383	ENST00000667544.1	SFTA1P	148	-22.13	148	-22.13	8959	22	781	684
hsa-miR-122-5p	ENSG00000225383	ENST00000415590.8	SFTA1P	148	-22.13	148	-22.13	8960	22	602	505
hsa-miR-122-5p	ENSG00000225383	ENST00000434919.7	SFTA1P	148	-22.13	148	-22.13	8961	22	498	401
hsa-miR-122-5p	ENSG00000225383	ENST00000739709.1	SFTA1P	148	-22.13	148	-22.13	8962	22	580	483
hsa-miR-122-5p	ENSG00000225383	ENST00000663743.1	SFTA1P	148	-22.13	148	-22.13	8963	22	675	580
hsa-miR-122-5p	ENSG00000225383	ENST00000652890.1	SFTA1P	305	-42.38	164	-25.48	8964	22	2459	1741
hsa-miR-122-5p	ENSG00000237512	ENST00000447119.4	UNC5B-AS1	150	-20.56	150	-20.56	8997	22	732	222
hsa-miR-122-5p	ENSG00000272447	ENST00000605920.1	AL135925.1	149	-20.23	149	-20.23	9018	22	1701	622
hsa-miR-122-5p	ENSG00000250397	ENST00000506172.2	AP006623.1	148	-16.27	148	-16.27	9051	22	2061	1791
hsa-miR-122-5p	ENSG00000254844	ENST00000531850.2	AP000757.2	289	-39.34	145	-20.59	9075	22	557	289
hsa-miR-122-5p	ENSG00000255248	ENST00000648163.1	MIR100HG	144	-18.23	144	-18.23	9116	22	2021	731
hsa-miR-122-5p	ENSG00000255248	ENST00000780503.1	MIR100HG	150	-21.95	150	-21.95	9189	22	1728	1546
hsa-miR-122-5p	ENSG00000255248	ENST00000669993.2	MIR100HG	148	-12.45	148	-12.45	9320	22	1326	257
hsa-miR-122-5p	ENSG00000258325	ENST00000636122.1	ITFG2-AS1	156	-21.84	156	-21.84	9337	22	962	464
hsa-miR-122-5p	ENSG00000258325	ENST00000715731.1	ITFG2-AS1	144	-15.31	144	-15.31	9343	22	2165	1097
hsa-miR-122-5p	ENSG00000258325	ENST00000839355.1	ITFG2-AS1	144	-15.31	144	-15.31	9344	22	1641	575
hsa-miR-122-5p	ENSG00000258325	ENST00000839354.1	ITFG2-AS1	144	-15.31	144	-15.31	9345	22	1574	508
hsa-miR-122-5p	ENSG00000258325	ENST00000839353.1	ITFG2-AS1	144	-15.31	144	-15.31	9346	22	1877	811
hsa-miR-122-5p	ENSG00000258325	ENST00000839352.1	ITFG2-AS1	144	-15.31	144	-15.31	9347	22	1589	523
hsa-miR-122-5p	ENSG00000258325	ENST00000839349.1	ITFG2-AS1	144	-15.31	144	-15.31	9348	22	2040	974
hsa-miR-122-5p	ENSG00000258325	ENST00000839351.1	ITFG2-AS1	144	-15.31	144	-15.31	9349	22	1750	686
hsa-miR-122-5p	ENSG00000255737	ENST00000542466.2	AGAP2-AS1	153	-17.78	153	-17.78	9376	22	1500	773
hsa-miR-122-5p	ENSG00000255794	ENST00000774553.1	RMST	145	-15	145	-15	9389	22	1365	629
hsa-miR-122-5p	ENSG00000255794	ENST00000774556.1	RMST	145	-15	145	-15	9404	22	873	518
hsa-miR-122-5p	ENSG00000272143	ENST00000606448.3	FGF14-AS2	147	-17.32	147	-17.32	9479	22	1130	309
hsa-miR-122-5p	ENSG00000224243	ENST00000732618.1	SOX1-OT	140	-19.39	140	-19.39	9483	22	3019	1156
hsa-miR-122-5p	ENSG00000224243	ENST00000421423.2	SOX1-OT	150	-23.9	150	-23.9	9507	22	1837	1324
hsa-miR-122-5p	ENSG00000224243	ENST00000653135.1	SOX1-OT	150	-23.9	150	-23.9	9508	22	512	172
hsa-miR-122-5p	ENSG00000258982	ENST00000554537.2	AL133523.1	292	-33.29	149	-18.49	9514	22	1730	1587
hsa-miR-122-5p	ENSG00000255571	ENST00000536780.6	MIR9-3HG	142	-15.26	142	-15.26	9538	22	4778	2166
hsa-miR-122-5p	ENSG00000255571	ENST00000654171.1	MIR9-3HG	142	-15.26	142	-15.26	9539	22	4350	1740
hsa-miR-122-5p	ENSG00000255571	ENST00000657897.1	MIR9-3HG	142	-15.26	142	-15.26	9541	22	4308	1699
hsa-miR-122-5p	ENSG00000255571	ENST00000661040.1	MIR9-3HG	142	-15.26	142	-15.26	9542	22	4092	1483
hsa-miR-122-5p	ENSG00000255571	ENST00000654184.1	MIR9-3HG	142	-15.26	142	-15.26	9543	22	4201	1591
hsa-miR-122-5p	ENSG00000255571	ENST00000658194.1	MIR9-3HG	142	-15.26	142	-15.26	9544	22	4266	1657
hsa-miR-122-5p	ENSG00000255571	ENST00000661036.1	MIR9-3HG	142	-15.26	142	-15.26	9545	22	4225	1616
hsa-miR-122-5p	ENSG00000255571	ENST00000659235.1	MIR9-3HG	142	-15.26	142	-15.26	9546	22	4269	1660
hsa-miR-122-5p	ENSG00000255571	ENST00000669499.1	MIR9-3HG	142	-15.26	142	-15.26	9547	22	3818	1209
hsa-miR-122-5p	ENSG00000255571	ENST00000654079.1	MIR9-3HG	142	-15.26	142	-15.26	9548	22	4019	1410
hsa-miR-122-5p	ENSG00000255571	ENST00000670779.1	MIR9-3HG	142	-15.26	142	-15.26	9549	22	3960	1348
hsa-miR-122-5p	ENSG00000255571	ENST00000658764.1	MIR9-3HG	142	-15.26	142	-15.26	9550	22	4175	1566
hsa-miR-122-5p	ENSG00000255571	ENST00000662043.1	MIR9-3HG	142	-15.26	142	-15.26	9555	22	1616	1493
hsa-miR-122-5p	ENSG00000255571	ENST00000666816.1	MIR9-3HG	142	-15.26	142	-15.26	9558	22	4053	1444
hsa-miR-122-5p	ENSG00000255571	ENST00000658770.1	MIR9-3HG	142	-15.26	142	-15.26	9559	22	3971	1362
hsa-miR-122-5p	ENSG00000255571	ENST00000667285.1	MIR9-3HG	142	-15.26	142	-15.26	9561	22	1889	1296
hsa-miR-122-5p	ENSG00000255571	ENST00000668524.1	MIR9-3HG	142	-15.26	142	-15.26	9562	22	1971	1378
hsa-miR-122-5p	ENSG00000255571	ENST00000665852.1	MIR9-3HG	142	-15.26	142	-15.26	9567	22	1508	1393
hsa-miR-122-5p	ENSG00000255571	ENST00000558754.6	MIR9-3HG	142	-15.26	142	-15.26	9569	22	2759	1839
hsa-miR-122-5p	ENSG00000255571	ENST00000669098.1	MIR9-3HG	142	-15.26	142	-15.26	9570	22	5427	2818
hsa-miR-122-5p	ENSG00000255571	ENST00000538734.7	MIR9-3HG	142	-15.26	142	-15.26	9572	22	1867	1274
hsa-miR-122-5p	ENSG00000255571	ENST00000669645.1	MIR9-3HG	142	-15.26	142	-15.26	9573	22	1904	1316
hsa-miR-122-5p	ENSG00000255571	ENST00000660601.1	MIR9-3HG	142	-15.26	142	-15.26	9574	22	2033	1440
hsa-miR-122-5p	ENSG00000255571	ENST00000660922.1	MIR9-3HG	142	-15.26	142	-15.26	9575	22	1827	1238
hsa-miR-122-5p	ENSG00000255571	ENST00000670238.1	MIR9-3HG	142	-15.26	142	-15.26	9576	22	1994	1403
hsa-miR-122-5p	ENSG00000255571	ENST00000546186.3	MIR9-3HG	142	-15.26	142	-15.26	9577	22	1746	1208
hsa-miR-122-5p	ENSG00000255571	ENST00000662136.1	MIR9-3HG	142	-15.26	142	-15.26	9583	22	1838	1256
hsa-miR-122-5p	ENSG00000255571	ENST00000671075.1	MIR9-3HG	142	-15.26	142	-15.26	9589	22	5094	2485
hsa-miR-122-5p	ENSG00000255571	ENST00000663717.1	MIR9-3HG	142	-15.26	142	-15.26	9590	22	5607	2998
hsa-miR-122-5p	ENSG00000255571	ENST00000671447.1	MIR9-3HG	142	-15.26	142	-15.26	9591	22	4989	2380
hsa-miR-122-5p	ENSG00000260807	ENST00000568394.1	AC009041.2	143	-16.54	143	-16.54	9607	22	3343	2233
hsa-miR-122-5p	ENSG00000260807	ENST00000565467.1	AC009041.2	143	-16.54	143	-16.54	9609	22	3726	2239
hsa-miR-122-5p	ENSG00000260807	ENST00000562570.2	AC009041.2	143	-16.54	143	-16.54	9612	22	3921	2255
hsa-miR-122-5p	ENSG00000261505	ENST00000567829.1	AL031714.1	149	-19.42	149	-19.42	9621	22	2926	1407
hsa-miR-122-5p	ENSG00000261505	ENST00000568106.1	AL031714.1	149	-19.42	149	-19.42	9622	22	3107	2952
hsa-miR-122-5p	ENSG00000261327	ENST00000562705.3	AC134312.5	428	-59.37	145	-24.82	9650	22	2397	771
hsa-miR-122-5p	ENSG00000261327	ENST00000768717.1	AC134312.5	283	-40.12	143	-24.82	9651	22	1686	1202
hsa-miR-122-5p	ENSG00000261327	ENST00000768714.1	AC134312.5	428	-59.37	145	-24.82	9652	22	1921	303
hsa-miR-122-5p	ENSG00000261327	ENST00000661363.2	AC134312.5	428	-59.37	145	-24.82	9653	22	2235	792
hsa-miR-122-5p	ENSG00000261327	ENST00000568031.2	AC134312.5	428	-59.37	145	-24.82	9654	22	2277	585
hsa-miR-122-5p	ENSG00000261327	ENST00000768715.1	AC134312.5	428	-59.37	145	-24.82	9655	22	1873	571
hsa-miR-122-5p	ENSG00000261327	ENST00000768718.1	AC134312.5	140	-15.3	140	-15.3	9656	22	1081	430
hsa-miR-122-5p	ENSG00000261327	ENST00000768716.1	AC134312.5	285	-34.55	145	-19.25	9657	22	1413	303
hsa-miR-122-5p	ENSG00000261327	ENST00000768719.1	AC134312.5	140	-15.3	140	-15.3	9658	22	1157	509
hsa-miR-122-5p	ENSG00000263345	ENST00000573007.1	AC006435.2	149	-20.36	149	-20.36	9661	22	442	197
hsa-miR-122-5p	ENSG00000266402	ENST00000580828.3	SNHG25	149	-21.89	149	-21.89	9678	22	513	384
hsa-miR-122-5p	ENSG00000266402	ENST00000776275.1	SNHG25	149	-21.89	149	-21.89	9679	22	534	405
hsa-miR-122-5p	ENSG00000266402	ENST00000776278.1	SNHG25	149	-21.89	149	-21.89	9680	22	745	444
hsa-miR-122-5p	ENSG00000266402	ENST00000582965.4	SNHG25	149	-21.89	149	-21.89	9681	22	1068	433
hsa-miR-122-5p	ENSG00000266402	ENST00000776279.1	SNHG25	149	-21.89	149	-21.89	9682	22	561	26
hsa-miR-122-5p	ENSG00000262877	ENST00000841501.1	AC110285.2	161	-21.34	161	-21.34	9691	22	893	435
hsa-miR-122-5p	ENSG00000283458	ENST00000807989.1	AC011139.1	154	-21.46	154	-21.46	9693	22	1020	566
hsa-miR-122-5p	ENSG00000283458	ENST00000637744.3	AC011139.1	154	-21.46	154	-21.46	9694	22	626	172
hsa-miR-122-5p	ENSG00000268670	ENST00000600056.1	AC016586.1	156	-25.1	156	-25.1	9723	22	684	568
hsa-miR-122-5p	ENSG00000267519	ENST00000587762.2	AC020916.1	748	-112.24	176	-24.98	9808	22	19049	16803
hsa-miR-122-5p	ENSG00000214049	ENST00000645805.1	UCA1	155	-17.24	155	-17.24	9811	22	2365	1127
hsa-miR-122-5p	ENSG00000214049	ENST00000644567.3	UCA1	155	-17.24	155	-17.24	9812	22	2638	1209
hsa-miR-122-5p	ENSG00000214049	ENST00000718453.1	UCA1	302	-30.96	155	-17.24	9813	22	7791	6259
hsa-miR-122-5p	ENSG00000214049	ENST00000644174.2	UCA1	155	-17.24	155	-17.24	9815	22	2688	1156
hsa-miR-122-5p	ENSG00000214049	ENST00000646494.2	UCA1	155	-17.24	155	-17.24	9817	22	1189	668
hsa-miR-122-5p	ENSG00000214049	ENST00000670862.2	UCA1	155	-17.24	155	-17.24	9818	22	1199	677
hsa-miR-122-5p	ENSG00000214049	ENST00000659568.2	UCA1	155	-17.24	155	-17.24	9819	22	1293	668
hsa-miR-122-5p	ENSG00000214049	ENST00000642256.3	UCA1	155	-17.24	155	-17.24	9820	22	2292	847
hsa-miR-122-5p	ENSG00000214049	ENST00000644962.2	UCA1	155	-17.24	155	-17.24	9821	22	1301	780
hsa-miR-122-5p	ENSG00000214049	ENST00000655708.2	UCA1	155	-17.24	155	-17.24	9822	22	1939	673
hsa-miR-122-5p	ENSG00000214049	ENST00000397381.7	UCA1	155	-17.24	155	-17.24	9823	22	2184	665
hsa-miR-122-5p	ENSG00000214049	ENST00000645389.2	UCA1	155	-17.24	155	-17.24	9825	22	878	715
hsa-miR-122-5p	ENSG00000214049	ENST00000643552.2	UCA1	155	-17.24	155	-17.24	9826	22	1465	841
hsa-miR-122-5p	ENSG00000214049	ENST00000655191.2	UCA1	155	-17.24	155	-17.24	9827	22	1991	649
hsa-miR-122-5p	ENSG00000214049	ENST00000644845.3	UCA1	155	-17.24	155	-17.24	9829	22	1348	827
hsa-miR-122-5p	ENSG00000214049	ENST00000757092.1	UCA1	155	-17.24	155	-17.24	9832	22	1008	487
hsa-miR-122-5p	ENSG00000214049	ENST00000645177.2	UCA1	155	-17.24	155	-17.24	9833	22	1840	775
hsa-miR-122-5p	ENSG00000214049	ENST00000644400.2	UCA1	155	-17.24	155	-17.24	9834	22	1707	775
hsa-miR-122-5p	ENSG00000214049	ENST00000757094.1	UCA1	155	-17.24	155	-17.24	9835	22	1484	862
hsa-miR-122-5p	ENSG00000214049	ENST00000642894.2	UCA1	155	-17.24	155	-17.24	9836	22	1294	670
hsa-miR-122-5p	ENSG00000214049	ENST00000757093.1	UCA1	155	-17.24	155	-17.24	9837	22	1033	512
hsa-miR-122-5p	ENSG00000214049	ENST00000645708.3	UCA1	155	-17.24	155	-17.24	9838	22	1378	753
hsa-miR-122-5p	ENSG00000214049	ENST00000666830.2	UCA1	155	-17.24	155	-17.24	9839	22	1921	772
hsa-miR-122-5p	ENSG00000214049	ENST00000647185.2	UCA1	155	-17.24	155	-17.24	9842	22	1299	739
hsa-miR-122-5p	ENSG00000214049	ENST00000643818.2	UCA1	155	-17.24	155	-17.24	9843	22	1060	539
hsa-miR-122-5p	ENSG00000214049	ENST00000646397.2	UCA1	155	-17.24	155	-17.24	9844	22	1219	698
hsa-miR-122-5p	ENSG00000214049	ENST00000643846.1	UCA1	155	-17.24	155	-17.24	9846	22	1084	566
hsa-miR-122-5p	ENSG00000214049	ENST00000644103.1	UCA1	155	-17.24	155	-17.24	9847	22	1337	716
hsa-miR-122-5p	ENSG00000214049	ENST00000644730.1	UCA1	155	-17.24	155	-17.24	9848	22	1122	640
hsa-miR-122-5p	ENSG00000214049	ENST00000646128.1	UCA1	155	-17.24	155	-17.24	9849	22	1174	553
hsa-miR-122-5p	ENSG00000214049	ENST00000645221.1	UCA1	155	-17.24	155	-17.24	9851	22	1191	640
hsa-miR-122-5p	ENSG00000214049	ENST00000645251.1	UCA1	155	-17.24	155	-17.24	9852	22	1155	531
hsa-miR-122-5p	ENSG00000214049	ENST00000644502.1	UCA1	155	-17.24	155	-17.24	9855	22	855	699
hsa-miR-122-5p	ENSG00000214049	ENST00000642269.2	UCA1	155	-17.24	155	-17.24	9858	22	1125	501
hsa-miR-122-5p	ENSG00000214049	ENST00000645156.2	UCA1	155	-17.24	155	-17.24	9859	22	1733	1109
hsa-miR-122-5p	ENSG00000214049	ENST00000589333.3	UCA1	155	-17.24	155	-17.24	9860	22	957	435
hsa-miR-122-5p	ENSG00000214049	ENST00000600160.3	UCA1	155	-17.24	155	-17.24	9861	22	998	477
hsa-miR-122-5p	ENSG00000205181	ENST00000379053.5	LINC00654	155	-26.54	155	-26.54	9890	22	6118	3727
hsa-miR-122-5p	ENSG00000237767	ENST00000669808.2	LINC01370	140	-18.85	140	-18.85	9947	22	2591	1311
hsa-miR-122-5p	ENSG00000237767	ENST00000670996.2	LINC01370	140	-18.85	140	-18.85	9950	22	1393	899
hsa-miR-122-5p	ENSG00000237767	ENST00000722243.1	LINC01370	140	-18.85	140	-18.85	9953	22	1718	471
hsa-miR-122-5p	ENSG00000237767	ENST00000667567.2	LINC01370	140	-18.85	140	-18.85	9959	22	2177	901
hsa-miR-122-5p	ENSG00000237767	ENST00000722248.1	LINC01370	140	-18.85	140	-18.85	9963	22	1531	509
hsa-miR-122-5p	ENSG00000237767	ENST00000722249.1	LINC01370	140	-18.85	140	-18.85	9966	22	509	374
hsa-miR-122-5p	ENSG00000237767	ENST00000722246.1	LINC01370	140	-18.85	140	-18.85	9972	22	1736	479
hsa-miR-122-5p	ENSG00000274248	ENST00000621707.2	AJ011932.1	155	-24.33	155	-24.33	10025	22	1118	713
hsa-miR-122-5p	ENSG00000260924	ENST00000565162.4	LINC01311	142	-14.31	142	-14.31	10026	22	2716	912
hsa-miR-122-5p	ENSG00000260924	ENST00000804548.1	LINC01311	142	-14.31	142	-14.31	10027	22	1008	463
hsa-miR-122-5p	ENSG00000218537	ENST00000406213.1	MIF-AS1	160	-25.65	160	-25.65	10032	22	1476	186
hsa-miR-122-5p	ENSG00000225783	ENST00000668051.1	MIAT	148	-19.43	148	-19.43	10033	22	1445	1017
hsa-miR-122-5p	ENSG00000225783	ENST00000418918.6	MIAT	148	-19.43	148	-19.43	10034	22	1390	967
hsa-miR-122-5p	ENSG00000225783	ENST00000421867.6	MIAT	148	-19.43	148	-19.43	10035	22	1317	889
hsa-miR-122-5p	ENSG00000225783	ENST00000643270.1	MIAT	148	-19.43	148	-19.43	10038	22	3760	996
hsa-miR-122-5p	ENSG00000225783	ENST00000450203.6	MIAT	148	-19.43	148	-19.43	10044	22	2290	467
hsa-miR-122-5p	ENSG00000225783	ENST00000717176.1	MIAT	148	-19.43	148	-19.43	10046	22	534	483
hsa-miR-122-5p	ENSG00000225783	ENST00000717177.1	MIAT	148	-19.43	148	-19.43	10047	22	1199	771
hsa-miR-122-5p	ENSG00000225783	ENST00000436238.6	MIAT	148	-19.43	148	-19.43	10049	22	1236	484
hsa-miR-122-5p	ENSG00000225783	ENST00000439738.5	MIAT	148	-19.43	148	-19.43	10050	22	628	553
hsa-miR-122-5p	ENSG00000225783	ENST00000452429.6	MIAT	148	-19.43	148	-19.43	10051	22	1852	726
hsa-miR-122-5p	ENSG00000225783	ENST00000693710.1	MIAT	140	-15.54	140	-15.54	10054	22	2398	1123
hsa-miR-122-5p	ENSG00000225783	ENST00000455640.5	MIAT	148	-19.43	148	-19.43	10055	22	612	491
hsa-miR-122-5p	ENSG00000225783	ENST00000451141.1	MIAT	148	-19.43	148	-19.43	10056	22	568	416
hsa-miR-122-5p	ENSG00000225783	ENST00000413665.6	MIAT	148	-19.43	148	-19.43	10058	22	1081	658
hsa-miR-122-5p	ENSG00000225783	ENST00000616469.4	MIAT	291	-34.55	148	-19.43	10059	22	10069	611
hsa-miR-122-5p	ENSG00000225783	ENST00000717187.1	MIAT	140	-15.54	140	-15.54	10061	22	1754	474
hsa-miR-122-5p	ENSG00000225783	ENST00000717209.1	MIAT	148	-19.43	148	-19.43	10062	22	980	552
hsa-miR-122-5p	ENSG00000225783	ENST00000717210.1	MIAT	148	-19.43	148	-19.43	10063	22	1059	486
hsa-miR-122-5p	ENSG00000225783	ENST00000717211.1	MIAT	148	-19.43	148	-19.43	10064	22	4185	486
hsa-miR-122-5p	ENSG00000225783	ENST00000613780.4	MIAT	291	-34.55	148	-19.43	10065	22	10143	559
hsa-miR-122-5p	ENSG00000225783	ENST00000616213.4	MIAT	291	-34.55	148	-19.43	10066	22	9943	485
hsa-miR-122-5p	ENSG00000225783	ENST00000717212.1	MIAT	148	-19.43	148	-19.43	10068	22	760	420
hsa-miR-122-5p	ENSG00000225783	ENST00000717188.1	MIAT	148	-19.43	148	-19.43	10070	22	2322	529
hsa-miR-122-5p	ENSG00000225783	ENST00000717189.1	MIAT	148	-19.43	148	-19.43	10071	22	836	571
hsa-miR-122-5p	ENSG00000225783	ENST00000717190.1	MIAT	148	-19.43	148	-19.43	10072	22	1226	574
hsa-miR-122-5p	ENSG00000225783	ENST00000458302.6	MIAT	148	-19.43	148	-19.43	10073	22	2875	535
hsa-miR-122-5p	ENSG00000225783	ENST00000717200.1	MIAT	148	-19.43	148	-19.43	10074	22	1963	417
hsa-miR-122-5p	ENSG00000225783	ENST00000717191.1	MIAT	148	-19.43	148	-19.43	10075	22	2206	417
hsa-miR-122-5p	ENSG00000225783	ENST00000453023.2	MIAT	148	-19.43	148	-19.43	10076	22	3225	602
hsa-miR-122-5p	ENSG00000225783	ENST00000717201.1	MIAT	148	-19.43	148	-19.43	10077	22	4016	417
hsa-miR-122-5p	ENSG00000225783	ENST00000620145.6	MIAT	291	-34.55	148	-19.43	10078	22	10004	417
hsa-miR-122-5p	ENSG00000225783	ENST00000419237.1	MIAT	148	-19.43	148	-19.43	10079	22	574	333
hsa-miR-122-5p	ENSG00000225783	ENST00000449717.2	MIAT	148	-19.43	148	-19.43	10080	22	1053	625
hsa-miR-122-5p	ENSG00000225783	ENST00000665574.1	MIAT	148	-19.43	148	-19.43	10081	22	4019	437
hsa-miR-122-5p	ENSG00000260708	ENST00000564152.3	AL118516.1	156	-15.64	156	-15.64	10107	22	735	695
hsa-miR-122-5p	ENSG00000281849	ENST00000717455.1	AL732314.6	154	-20.37	154	-20.37	10112	22	1871	1334
hsa-miR-122-5p	ENSG00000281849	ENST00000717456.1	AL732314.6	291	-45.6	151	-23.45	10113	22	2543	390
hsa-miR-122-5p	ENSG00000223749	ENST00000673627.2	MIR503HG	142	-16.1	142	-16.1	10119	22	1329	778
hsa-miR-122-5p	ENSG00000223749	ENST00000414769.3	MIR503HG	142	-16.1	142	-16.1	10120	22	1212	662
hsa-miR-122-5p	ENSG00000223749	ENST00000440570.7	MIR503HG	142	-16.1	142	-16.1	10121	22	1140	591
hsa-miR-122-5p	ENSG00000223749	ENST00000666697.2	MIR503HG	142	-16.1	142	-16.1	10122	22	1055	709
hsa-miR-122-5p	ENSG00000223749	ENST00000457876.7	MIR503HG	142	-16.1	142	-16.1	10123	22	1715	1369
hsa-miR-122-5p	ENSG00000223749	ENST00000809848.1	MIR503HG	142	-16.1	142	-16.1	10124	22	860	514
hsa-miR-122-5p	ENSG00000223749	ENST00000809845.1	MIR503HG	142	-16.1	142	-16.1	10125	22	930	597
hsa-miR-122-5p	ENSG00000223749	ENST00000445415.3	MIR503HG	142	-16.1	142	-16.1	10126	22	973	641
hsa-miR-122-5p	ENSG00000223749	ENST00000809850.1	MIR503HG	142	-16.1	142	-16.1	10127	22	838	506
hsa-miR-122-5p	ENSG00000223749	ENST00000809846.1	MIR503HG	142	-16.1	142	-16.1	10128	22	863	531
hsa-miR-122-5p	ENSG00000223749	ENST00000670930.1	MIR503HG	142	-16.1	142	-16.1	10129	22	813	482
hsa-miR-122-5p	ENSG00000223749	ENST00000655068.1	MIR503HG	142	-16.1	142	-16.1	10130	22	1320	991
hsa-miR-122-5p	ENSG00000270726	ENST00000483543.7	AJ271736.1	140	-17.32	140	-17.32	10144	22	773	283
hsa-miR-338-3p	ENSG00000225880	ENST00000743821.1	LINC00115	154	-19.23	154	-19.23	10152	22	2153	172
hsa-miR-338-3p	ENSG00000225880	ENST00000743822.1	LINC00115	154	-19.23	154	-19.23	10153	22	1641	60
hsa-miR-338-3p	ENSG00000225880	ENST00000506640.4	LINC00115	154	-19.23	154	-19.23	10159	22	6494	465
hsa-miR-338-3p	ENSG00000225880	ENST00000743858.1	LINC00115	154	-19.23	154	-19.23	10161	22	1666	424
hsa-miR-338-3p	ENSG00000225880	ENST00000743824.1	LINC00115	154	-19.23	154	-19.23	10162	22	1182	134
hsa-miR-338-3p	ENSG00000225880	ENST00000743823.1	LINC00115	154	-19.23	154	-19.23	10163	22	1292	244
hsa-miR-338-3p	ENSG00000225880	ENST00000743865.1	LINC00115	154	-19.23	154	-19.23	10164	22	1125	183
hsa-miR-338-3p	ENSG00000225880	ENST00000743825.1	LINC00115	154	-19.23	154	-19.23	10165	22	1470	663
hsa-miR-338-3p	ENSG00000225880	ENST00000743835.1	LINC00115	154	-19.23	154	-19.23	10166	22	1684	992
hsa-miR-338-3p	ENSG00000225880	ENST00000743826.1	LINC00115	154	-19.23	154	-19.23	10167	22	1113	590
hsa-miR-338-3p	ENSG00000225880	ENST00000743866.1	LINC00115	154	-19.23	154	-19.23	10168	22	929	134
hsa-miR-338-3p	ENSG00000225880	ENST00000743867.1	LINC00115	154	-19.23	154	-19.23	10169	22	655	162
hsa-miR-338-3p	ENSG00000225880	ENST00000743827.1	LINC00115	154	-19.23	154	-19.23	10170	22	661	186
hsa-miR-338-3p	ENSG00000225880	ENST00000743828.1	LINC00115	154	-19.23	154	-19.23	10171	22	672	308
hsa-miR-338-3p	ENSG00000225880	ENST00000743830.1	LINC00115	154	-19.23	154	-19.23	10172	22	623	263
hsa-miR-338-3p	ENSG00000225880	ENST00000743829.1	LINC00115	154	-19.23	154	-19.23	10173	22	575	215
hsa-miR-338-3p	ENSG00000225880	ENST00000743831.1	LINC00115	154	-19.23	154	-19.23	10174	22	601	242
hsa-miR-338-3p	ENSG00000225880	ENST00000743833.1	LINC00115	154	-19.23	154	-19.23	10175	22	1183	824
hsa-miR-338-3p	ENSG00000225880	ENST00000743832.1	LINC00115	154	-19.23	154	-19.23	10176	22	872	514
hsa-miR-338-3p	ENSG00000225880	ENST00000743870.1	LINC00115	154	-19.23	154	-19.23	10177	22	814	412
hsa-miR-338-3p	ENSG00000225880	ENST00000743869.1	LINC00115	154	-19.23	154	-19.23	10178	22	414	139
hsa-miR-338-3p	ENSG00000225880	ENST00000743872.1	LINC00115	298	-37.79	154	-19.23	10179	22	817	174
hsa-miR-338-3p	ENSG00000225880	ENST00000743871.1	LINC00115	298	-37.79	154	-19.23	10180	22	1105	462
hsa-miR-338-3p	ENSG00000225880	ENST00000743874.1	LINC00115	154	-19.23	154	-19.23	10181	22	906	390
hsa-miR-338-3p	ENSG00000225880	ENST00000743834.1	LINC00115	154	-19.23	154	-19.23	10182	22	861	347
hsa-miR-338-3p	ENSG00000225880	ENST00000743873.1	LINC00115	154	-19.23	154	-19.23	10183	22	663	152
hsa-miR-338-3p	ENSG00000225880	ENST00000743876.1	LINC00115	154	-19.23	154	-19.23	10184	22	525	486
hsa-miR-338-3p	ENSG00000225880	ENST00000473798.3	LINC00115	140	-19.95	140	-19.95	10231	22	3602	1853
hsa-miR-338-3p	ENSG00000235407	ENST00000457402.2	CYMP-AS1	157	-24.42	157	-24.42	10314	22	2374	151
hsa-miR-338-3p	ENSG00000125462	ENST00000758350.1	C1orf61	140	-15.86	140	-15.86	10392	22	624	153
hsa-miR-338-3p	ENSG00000125462	ENST00000673141.1	C1orf61	140	-13.77	140	-13.77	10445	22	1395	350
hsa-miR-338-3p	ENSG00000125462	ENST00000758351.1	C1orf61	140	-15.86	140	-15.86	10458	22	717	150
hsa-miR-338-3p	ENSG00000125462	ENST00000758349.1	C1orf61	140	-15.86	140	-15.86	10459	22	1097	182
hsa-miR-338-3p	ENSG00000125462	ENST00000488498.2	C1orf61	155	-17.15	155	-17.15	10519	22	4774	398
hsa-miR-338-3p	ENSG00000125462	ENST00000495000.3	C1orf61	144	-15.38	144	-15.38	10558	22	1639	76
hsa-miR-338-3p	ENSG00000125462	ENST00000758362.1	C1orf61	144	-15.38	144	-15.38	10563	22	1424	58
hsa-miR-338-3p	ENSG00000215808	ENST00000400946.4	LINC01139	151	-16.41	151	-16.41	10584	22	1589	1016
hsa-miR-338-3p	ENSG00000215808	ENST00000648241.1	LINC01139	151	-16.41	151	-16.41	10585	22	1536	974
hsa-miR-338-3p	ENSG00000215808	ENST00000657655.1	LINC01139	151	-16.41	151	-16.41	10586	22	1585	1023
hsa-miR-338-3p	ENSG00000215808	ENST00000648188.1	LINC01139	151	-16.41	151	-16.41	10587	22	1450	913
hsa-miR-338-3p	ENSG00000215808	ENST00000649385.1	LINC01139	151	-16.41	151	-16.41	10588	22	1430	899
hsa-miR-338-3p	ENSG00000215808	ENST00000649681.1	LINC01139	151	-16.41	151	-16.41	10589	22	5583	5089
hsa-miR-338-3p	ENSG00000228857	ENST00000689404.2	AC104653.1	150	-17.09	150	-17.09	10676	22	1401	1161
hsa-miR-338-3p	ENSG00000228857	ENST00000827863.1	AC104653.1	150	-17.09	150	-17.09	10677	22	1691	1451
hsa-miR-338-3p	ENSG00000228857	ENST00000827868.1	AC104653.1	148	-14.55	148	-14.55	10682	22	696	79
hsa-miR-338-3p	ENSG00000228857	ENST00000827877.1	AC104653.1	148	-14.55	148	-14.55	10693	22	725	129
hsa-miR-338-3p	ENSG00000228857	ENST00000827892.1	AC104653.1	148	-14.55	148	-14.55	10697	22	713	75
hsa-miR-338-3p	ENSG00000228857	ENST00000827878.1	AC104653.1	148	-14.55	148	-14.55	10702	22	654	65
hsa-miR-338-3p	ENSG00000228857	ENST00000827891.1	AC104653.1	148	-14.55	148	-14.55	10703	22	677	89
hsa-miR-338-3p	ENSG00000231013	ENST00000657643.1	AC013275.1	141	-12.54	141	-12.54	10714	22	2960	419
hsa-miR-338-3p	ENSG00000230838	ENST00000768239.1	LINC01614	150	-16.73	150	-16.73	10729	22	2088	1913
hsa-miR-338-3p	ENSG00000230838	ENST00000768240.1	LINC01614	150	-16.73	150	-16.73	10730	22	2138	1963
hsa-miR-338-3p	ENSG00000230838	ENST00000415479.3	LINC01614	150	-16.73	150	-16.73	10731	22	2294	2116
hsa-miR-338-3p	ENSG00000230838	ENST00000768241.1	LINC01614	150	-16.73	150	-16.73	10732	22	1978	1806
hsa-miR-338-3p	ENSG00000250846	ENST00000503625.2	EPHA5-AS1	285	-31.33	144	-17.35	10764	22	3348	908
hsa-miR-338-3p	ENSG00000271474	ENST00000605849.2	AC106881.1	144	-24	144	-24	10770	22	3534	1876
hsa-miR-338-3p	ENSG00000246090	ENST00000500358.6	AP002026.1	144	-16.93	144	-16.93	10800	22	4825	3048
hsa-miR-338-3p	ENSG00000225138	ENST00000658225.1	SLC9A3-AS1	144	-19.49	144	-19.49	10922	22	1459	300
hsa-miR-338-3p	ENSG00000225138	ENST00000667998.1	SLC9A3-AS1	144	-19.49	144	-19.49	10923	22	552	173
hsa-miR-338-3p	ENSG00000225138	ENST00000667376.1	SLC9A3-AS1	144	-19.49	144	-19.49	10924	22	1440	414
hsa-miR-338-3p	ENSG00000225138	ENST00000607005.6	SLC9A3-AS1	144	-19.49	144	-19.49	10925	22	597	334
hsa-miR-338-3p	ENSG00000225138	ENST00000606074.1	SLC9A3-AS1	144	-19.49	144	-19.49	10927	22	1067	143
hsa-miR-338-3p	ENSG00000225138	ENST00000655313.1	SLC9A3-AS1	144	-19.49	144	-19.49	10929	22	632	66
hsa-miR-338-3p	ENSG00000225138	ENST00000534918.1	SLC9A3-AS1	148	-17.31	148	-17.31	10930	22	2762	1254
hsa-miR-338-3p	ENSG00000247516	ENST00000667556.1	MIR4458HG	304	-31.73	160	-21.06	10939	22	1108	16
hsa-miR-338-3p	ENSG00000247516	ENST00000669566.1	MIR4458HG	448	-44.36	160	-21.06	10940	22	1713	6
hsa-miR-338-3p	ENSG00000247516	ENST00000660398.1	MIR4458HG	304	-31.73	160	-21.06	10941	22	1167	6
hsa-miR-338-3p	ENSG00000247516	ENST00000669529.1	MIR4458HG	304	-31.73	160	-21.06	10942	22	1727	6
hsa-miR-338-3p	ENSG00000247516	ENST00000669539.1	MIR4458HG	295	-27.82	151	-17.15	10943	22	1731	1
hsa-miR-338-3p	ENSG00000247516	ENST00000605918.1	MIR4458HG	144	-10.67	144	-10.67	10944	22	1057	788
hsa-miR-338-3p	ENSG00000247516	ENST00000669668.1	MIR4458HG	289	-30.85	145	-18.02	10945	22	2115	1142
hsa-miR-338-3p	ENSG00000247516	ENST00000502001.2	MIR4458HG	144	-12.83	144	-12.83	10946	22	1005	844
hsa-miR-338-3p	ENSG00000247516	ENST00000664641.2	MIR4458HG	289	-30.85	145	-18.02	10947	22	3370	961
hsa-miR-338-3p	ENSG00000247516	ENST00000606459.1	MIR4458HG	289	-30.85	145	-18.02	10948	22	3239	831
hsa-miR-338-3p	ENSG00000247516	ENST00000721171.1	MIR4458HG	289	-30.85	145	-18.02	10952	22	1070	940
hsa-miR-338-3p	ENSG00000245526	ENST00000669424.1	LINC00461	140	-13.09	140	-13.09	10989	22	8262	462
hsa-miR-338-3p	ENSG00000245526	ENST00000692551.2	LINC00461	152	-17.29	152	-17.29	11022	22	961	62
hsa-miR-338-3p	ENSG00000245526	ENST00000787088.1	LINC00461	152	-17.29	152	-17.29	11031	22	1036	80
hsa-miR-338-3p	ENSG00000245526	ENST00000787100.1	LINC00461	140	-13.64	140	-13.64	11039	22	2015	942
hsa-miR-338-3p	ENSG00000245526	ENST00000787104.1	LINC00461	140	-13.64	140	-13.64	11040	22	980	688
hsa-miR-338-3p	ENSG00000245526	ENST00000500197.6	LINC00461	140	-13.09	140	-13.09	11047	22	3381	558
hsa-miR-338-3p	ENSG00000245526	ENST00000505030.6	LINC00461	140	-13.09	140	-13.09	11048	22	3957	1134
hsa-miR-338-3p	ENSG00000245526	ENST00000658935.2	LINC00461	140	-13.09	140	-13.09	11049	22	2923	627
hsa-miR-338-3p	ENSG00000245526	ENST00000511014.8	LINC00461	140	-13.09	140	-13.09	11050	22	3584	761
hsa-miR-338-3p	ENSG00000245526	ENST00000663276.2	LINC00461	140	-13.09	140	-13.09	11051	22	3406	583
hsa-miR-338-3p	ENSG00000245526	ENST00000509265.2	LINC00461	140	-13.09	140	-13.09	11053	22	3694	890
hsa-miR-338-3p	ENSG00000245526	ENST00000666195.1	LINC00461	140	-13.09	140	-13.09	11054	22	3409	626
hsa-miR-338-3p	ENSG00000245526	ENST00000661688.1	LINC00461	140	-13.09	140	-13.09	11055	22	2469	584
hsa-miR-338-3p	ENSG00000245526	ENST00000509783.6	LINC00461	140	-13.09	140	-13.09	11057	22	1494	523
hsa-miR-338-3p	ENSG00000245526	ENST00000513026.7	LINC00461	140	-13.09	140	-13.09	11058	22	1514	545
hsa-miR-338-3p	ENSG00000245526	ENST00000515885.6	LINC00461	140	-13.09	140	-13.09	11059	22	1421	455
hsa-miR-338-3p	ENSG00000245526	ENST00000787103.1	LINC00461	140	-13.09	140	-13.09	11061	22	1465	499
hsa-miR-338-3p	ENSG00000245526	ENST00000513893.6	LINC00461	140	-13.09	140	-13.09	11062	22	1595	631
hsa-miR-338-3p	ENSG00000245526	ENST00000504246.6	LINC00461	140	-13.09	140	-13.09	11063	22	2621	1673
hsa-miR-338-3p	ENSG00000245526	ENST00000787117.1	LINC00461	140	-13.09	140	-13.09	11064	22	607	473
hsa-miR-338-3p	ENSG00000245526	ENST00000787114.1	LINC00461	140	-13.09	140	-13.09	11065	22	576	472
hsa-miR-338-3p	ENSG00000245526	ENST00000671230.1	LINC00461	149	-16.49	149	-16.49	11066	22	2255	1453
hsa-miR-338-3p	ENSG00000248663	ENST00000514186.5	LINC00992	156	-18.11	156	-18.11	11081	22	564	279
hsa-miR-338-3p	ENSG00000271730	ENST00000605885.1	AL390208.1	156	-16.42	156	-16.42	11111	22	644	550
hsa-miR-338-3p	ENSG00000270419	ENST00000604200.3	CAHM	146	-20.25	146	-20.25	11137	22	1815	1355
hsa-miR-338-3p	ENSG00000282572	ENST00000635373.1	AC215522.2	144	-22.49	144	-22.49	11151	22	600	549
hsa-miR-338-3p	ENSG00000282572	ENST00000822010.1	AC215522.2	154	-17.5	154	-17.5	11157	22	2050	1234
hsa-miR-338-3p	ENSG00000229533	ENST00000452700.1	AC003986.1	142	-16.22	142	-16.22	11179	22	1526	299
hsa-miR-338-3p	ENSG00000231764	ENST00000430027.3	DLX6-AS1	148	-17.26	148	-17.26	11193	22	15364	2761
hsa-miR-338-3p	ENSG00000231764	ENST00000659765.2	DLX6-AS1	148	-17.26	148	-17.26	11194	22	4722	2397
hsa-miR-338-3p	ENSG00000231764	ENST00000458352.5	DLX6-AS1	148	-17.26	148	-17.26	11195	22	5529	3235
hsa-miR-338-3p	ENSG00000231764	ENST00000656954.2	DLX6-AS1	148	-17.26	148	-17.26	11196	22	4413	2220
hsa-miR-338-3p	ENSG00000231764	ENST00000605417.6	DLX6-AS1	148	-17.26	148	-17.26	11197	22	3995	1955
hsa-miR-338-3p	ENSG00000231764	ENST00000841667.1	DLX6-AS1	148	-17.26	148	-17.26	11201	22	2487	1537
hsa-miR-338-3p	ENSG00000231764	ENST00000658043.1	DLX6-AS1	148	-17.26	148	-17.26	11204	22	3119	2222
hsa-miR-338-3p	ENSG00000231764	ENST00000654988.1	DLX6-AS1	148	-17.26	148	-17.26	11205	22	3001	2104
hsa-miR-338-3p	ENSG00000239569	ENST00000718398.1	KMT2E-AS1	289	-25.43	148	-14.96	11252	22	1763	1476
hsa-miR-338-3p	ENSG00000239569	ENST00000453666.2	KMT2E-AS1	156	-20.78	156	-20.78	11253	22	923	649
hsa-miR-338-3p	ENSG00000239569	ENST00000787479.1	KMT2E-AS1	141	-10.47	141	-10.47	11254	22	1234	536
hsa-miR-338-3p	ENSG00000239569	ENST00000787480.1	KMT2E-AS1	141	-10.47	141	-10.47	11256	22	415	224
hsa-miR-338-3p	ENSG00000239569	ENST00000787483.1	KMT2E-AS1	141	-10.47	141	-10.47	11257	22	1149	501
hsa-miR-338-3p	ENSG00000239569	ENST00000787481.1	KMT2E-AS1	141	-10.47	141	-10.47	11258	22	1091	474
hsa-miR-338-3p	ENSG00000239569	ENST00000787482.1	KMT2E-AS1	141	-10.47	141	-10.47	11259	22	833	239
hsa-miR-338-3p	ENSG00000239569	ENST00000450686.2	KMT2E-AS1	141	-10.47	141	-10.47	11260	22	897	244
hsa-miR-338-3p	ENSG00000239569	ENST00000787489.1	KMT2E-AS1	141	-10.47	141	-10.47	11261	22	1248	600
hsa-miR-338-3p	ENSG00000239569	ENST00000787498.1	KMT2E-AS1	141	-10.47	141	-10.47	11262	22	1147	509
hsa-miR-338-3p	ENSG00000239569	ENST00000787499.1	KMT2E-AS1	141	-10.47	141	-10.47	11263	22	969	292
hsa-miR-338-3p	ENSG00000239569	ENST00000787494.1	KMT2E-AS1	141	-10.47	141	-10.47	11264	22	909	228
hsa-miR-338-3p	ENSG00000239569	ENST00000787492.1	KMT2E-AS1	141	-10.47	141	-10.47	11265	22	1257	619
hsa-miR-338-3p	ENSG00000239569	ENST00000787493.1	KMT2E-AS1	141	-10.47	141	-10.47	11266	22	1127	450
hsa-miR-338-3p	ENSG00000239569	ENST00000787497.1	KMT2E-AS1	141	-10.47	141	-10.47	11267	22	1098	619
hsa-miR-338-3p	ENSG00000239569	ENST00000787490.1	KMT2E-AS1	141	-10.47	141	-10.47	11268	22	965	327
hsa-miR-338-3p	ENSG00000239569	ENST00000787491.1	KMT2E-AS1	141	-10.47	141	-10.47	11269	22	935	456
hsa-miR-338-3p	ENSG00000239569	ENST00000787484.1	KMT2E-AS1	141	-10.47	141	-10.47	11270	22	1109	630
hsa-miR-338-3p	ENSG00000239569	ENST00000787485.1	KMT2E-AS1	141	-10.47	141	-10.47	11271	22	1010	332
hsa-miR-338-3p	ENSG00000239569	ENST00000787486.1	KMT2E-AS1	141	-10.47	141	-10.47	11272	22	921	244
hsa-miR-338-3p	ENSG00000239569	ENST00000787487.1	KMT2E-AS1	141	-10.47	141	-10.47	11273	22	1356	718
hsa-miR-338-3p	ENSG00000239569	ENST00000787488.1	KMT2E-AS1	141	-10.47	141	-10.47	11274	22	1099	461
hsa-miR-338-3p	ENSG00000239569	ENST00000787495.1	KMT2E-AS1	141	-10.47	141	-10.47	11275	22	1159	444
hsa-miR-338-3p	ENSG00000239569	ENST00000787500.1	KMT2E-AS1	141	-10.47	141	-10.47	11276	22	833	294
hsa-miR-338-3p	ENSG00000239569	ENST00000787496.1	KMT2E-AS1	141	-10.47	141	-10.47	11277	22	1118	450
hsa-miR-338-3p	ENSG00000239569	ENST00000787501.1	KMT2E-AS1	141	-10.47	141	-10.47	11278	22	1336	673
hsa-miR-338-3p	ENSG00000239569	ENST00000787502.1	KMT2E-AS1	141	-10.47	141	-10.47	11279	22	391	269
hsa-miR-338-3p	ENSG00000284116	ENST00000809451.1	AL772307.1	140	-15.86	140	-15.86	11422	22	1128	513
hsa-miR-338-3p	ENSG00000284116	ENST00000809452.1	AL772307.1	140	-15.86	140	-15.86	11423	22	784	489
hsa-miR-338-3p	ENSG00000284116	ENST00000809453.1	AL772307.1	140	-15.86	140	-15.86	11424	22	560	388
hsa-miR-338-3p	ENSG00000204802	ENST00000717364.1	AL590399.1	140	-14.77	140	-14.77	11427	22	1419	43
hsa-miR-338-3p	ENSG00000204802	ENST00000717368.1	AL590399.1	140	-16.73	140	-16.73	11434	22	729	435
hsa-miR-338-3p	ENSG00000204802	ENST00000755026.1	AL590399.1	140	-16.73	140	-16.73	11435	22	752	461
hsa-miR-338-3p	ENSG00000204802	ENST00000377518.4	AL590399.1	285	-32.93	145	-16.73	11436	22	2784	866
hsa-miR-338-3p	ENSG00000204802	ENST00000717369.1	AL590399.1	140	-16.73	140	-16.73	11437	22	343	184
hsa-miR-338-3p	ENSG00000204802	ENST00000717370.1	AL590399.1	140	-16.73	140	-16.73	11438	22	356	197
hsa-miR-338-3p	ENSG00000204802	ENST00000717371.1	AL590399.1	140	-16.73	140	-16.73	11439	22	1071	916
hsa-miR-338-3p	ENSG00000204802	ENST00000717372.1	AL590399.1	140	-16.73	140	-16.73	11440	22	776	623
hsa-miR-338-3p	ENSG00000204802	ENST00000717373.1	AL590399.1	140	-16.73	140	-16.73	11441	22	378	227
hsa-miR-338-3p	ENSG00000204802	ENST00000755028.1	AL590399.1	145	-16.2	145	-16.2	11449	22	1399	814
hsa-miR-338-3p	ENSG00000204802	ENST00000755030.1	AL590399.1	145	-16.2	145	-16.2	11454	22	1370	792
hsa-miR-338-3p	ENSG00000269929	ENST00000652769.2	AL158152.1	147	-15.24	147	-15.24	11461	22	3824	1313
hsa-miR-338-3p	ENSG00000269929	ENST00000652620.1	AL158152.1	155	-19.56	155	-19.56	11462	22	898	224
hsa-miR-338-3p	ENSG00000225383	ENST00000739711.1	SFTA1P	140	-16.06	140	-16.06	11493	22	665	346
hsa-miR-338-3p	ENSG00000225383	ENST00000652890.1	SFTA1P	144	-17.99	144	-17.99	11500	22	2459	1773
hsa-miR-338-3p	ENSG00000204682	ENST00000658000.1	CASC10	142	-20.2	142	-20.2	11504	22	3799	2998
hsa-miR-338-3p	ENSG00000272447	ENST00000605920.1	AL135925.1	144	-19.92	144	-19.92	11554	22	1701	726
hsa-miR-338-3p	ENSG00000180139	ENST00000437930.4	ACTA2-AS1	143	-13.26	143	-13.26	11556	22	2450	2199
hsa-miR-338-3p	ENSG00000180139	ENST00000596007.1	ACTA2-AS1	143	-13.26	143	-13.26	11557	22	859	337
hsa-miR-338-3p	ENSG00000232229	ENST00000448963.5	LINC00865	299	-40.92	158	-23.78	11560	22	4272	2846
hsa-miR-338-3p	ENSG00000232229	ENST00000448490.1	LINC00865	299	-40.92	158	-23.78	11561	22	3891	2465
hsa-miR-338-3p	ENSG00000232229	ENST00000670043.1	LINC00865	150	-13.99	150	-13.99	11562	22	1241	1070
hsa-miR-338-3p	ENSG00000232229	ENST00000686130.2	LINC00865	299	-40.92	158	-23.78	11563	22	3816	2388
hsa-miR-338-3p	ENSG00000232229	ENST00000749374.1	LINC00865	154	-17.03	154	-17.03	11569	22	773	694
hsa-miR-338-3p	ENSG00000273599	ENST00000617058.1	AL731571.1	167	-22.98	167	-22.98	11580	22	5428	3916
hsa-miR-338-3p	ENSG00000255248	ENST00000690059.1	MIR100HG	140	-16.42	140	-16.42	11634	22	1144	464
hsa-miR-338-3p	ENSG00000255248	ENST00000647591.1	MIR100HG	154	-18.23	154	-18.23	11655	22	3218	2202
hsa-miR-338-3p	ENSG00000255248	ENST00000660148.1	MIR100HG	154	-18.23	154	-18.23	11656	22	2859	2209
hsa-miR-338-3p	ENSG00000255248	ENST00000532319.2	MIR100HG	154	-18.23	154	-18.23	11659	22	3003	2219
hsa-miR-338-3p	ENSG00000255248	ENST00000657554.1	MIR100HG	287	-30.64	144	-15.73	11660	22	1609	866
hsa-miR-338-3p	ENSG00000255248	ENST00000655232.1	MIR100HG	287	-30.64	144	-15.73	11661	22	1186	448
hsa-miR-338-3p	ENSG00000255248	ENST00000670198.1	MIR100HG	154	-18.23	154	-18.23	11664	22	3098	2486
hsa-miR-338-3p	ENSG00000255248	ENST00000666485.1	MIR100HG	289	-32.26	145	-16.53	11665	22	4195	1535
hsa-miR-338-3p	ENSG00000255248	ENST00000656226.1	MIR100HG	441	-48.87	154	-18.23	11666	22	3014	2163
hsa-miR-338-3p	ENSG00000255248	ENST00000656682.1	MIR100HG	154	-18.23	154	-18.23	11667	22	4534	2197
hsa-miR-338-3p	ENSG00000255248	ENST00000659296.1	MIR100HG	154	-18.23	154	-18.23	11668	22	4175	2235
hsa-miR-338-3p	ENSG00000255248	ENST00000668776.2	MIR100HG	148	-17.36	148	-17.36	11680	22	4383	463
hsa-miR-338-3p	ENSG00000255248	ENST00000655814.1	MIR100HG	140	-15.03	140	-15.03	11699	22	2585	365
hsa-miR-338-3p	ENSG00000255248	ENST00000637700.1	MIR100HG	140	-15.03	140	-15.03	11700	22	2262	390
hsa-miR-338-3p	ENSG00000255248	ENST00000780383.1	MIR100HG	153	-17.06	153	-17.06	11709	22	1125	116
hsa-miR-338-3p	ENSG00000255248	ENST00000780382.1	MIR100HG	140	-15.03	140	-15.03	11710	22	1218	422
hsa-miR-338-3p	ENSG00000255248	ENST00000780381.1	MIR100HG	153	-17.06	153	-17.06	11711	22	1071	150
hsa-miR-338-3p	ENSG00000255248	ENST00000780388.1	MIR100HG	140	-15.03	140	-15.03	11730	22	2162	402
hsa-miR-338-3p	ENSG00000255248	ENST00000533109.6	MIR100HG	140	-15.03	140	-15.03	11750	22	1794	707
hsa-miR-338-3p	ENSG00000255248	ENST00000780433.1	MIR100HG	160	-17.92	160	-17.92	11770	22	1047	140
hsa-miR-338-3p	ENSG00000255248	ENST00000780478.1	MIR100HG	150	-15.07	150	-15.07	11787	22	1738	775
hsa-miR-338-3p	ENSG00000255248	ENST00000527474.5	MIR100HG	140	-15.03	140	-15.03	11789	22	959	752
hsa-miR-338-3p	ENSG00000255248	ENST00000780395.1	MIR100HG	153	-17.06	153	-17.06	11805	22	1421	153
hsa-miR-338-3p	ENSG00000255248	ENST00000661695.1	MIR100HG	140	-15.03	140	-15.03	11806	22	635	459
hsa-miR-338-3p	ENSG00000255248	ENST00000780447.1	MIR100HG	168	-23.48	168	-23.48	11816	22	953	98
hsa-miR-338-3p	ENSG00000255248	ENST00000658452.1	MIR100HG	140	-15.03	140	-15.03	11823	22	1234	432
hsa-miR-338-3p	ENSG00000255248	ENST00000529804.6	MIR100HG	140	-15.03	140	-15.03	11825	22	1217	512
hsa-miR-338-3p	ENSG00000255248	ENST00000659378.2	MIR100HG	140	-15.03	140	-15.03	11826	22	1424	624
hsa-miR-338-3p	ENSG00000255248	ENST00000780439.1	MIR100HG	145	-13.29	145	-13.29	11828	22	910	53
hsa-miR-338-3p	ENSG00000255248	ENST00000780443.1	MIR100HG	300	-32.95	160	-17.92	11830	22	1568	420
hsa-miR-338-3p	ENSG00000255248	ENST00000663802.1	MIR100HG	140	-15.03	140	-15.03	11831	22	1481	684
hsa-miR-338-3p	ENSG00000255248	ENST00000780400.1	MIR100HG	159	-19.52	159	-19.52	11833	22	1115	265
hsa-miR-338-3p	ENSG00000255248	ENST00000780446.1	MIR100HG	308	-38.51	168	-23.48	11834	22	1399	247
hsa-miR-338-3p	ENSG00000255248	ENST00000648084.1	MIR100HG	300	-32.95	160	-17.92	11835	22	995	230
hsa-miR-338-3p	ENSG00000255248	ENST00000780470.1	MIR100HG	303	-38.29	163	-23.26	11842	22	1575	365
hsa-miR-338-3p	ENSG00000255248	ENST00000780469.1	MIR100HG	140	-15.03	140	-15.03	11843	22	1341	525
hsa-miR-338-3p	ENSG00000255248	ENST00000780482.1	MIR100HG	307	-36.52	163	-23.26	11845	22	970	179
hsa-miR-338-3p	ENSG00000255248	ENST00000780483.1	MIR100HG	144	-13.26	144	-13.26	11846	22	806	719
hsa-miR-338-3p	ENSG00000255248	ENST00000527100.1	MIR100HG	160	-17.92	160	-17.92	11849	22	507	431
hsa-miR-338-3p	ENSG00000278743	ENST00000622671.3	AC087239.1	158	-23.73	158	-23.73	11902	22	1231	393
hsa-miR-338-3p	ENSG00000278743	ENST00000790877.1	AC087239.1	158	-23.73	158	-23.73	11903	22	551	318
hsa-miR-338-3p	ENSG00000278743	ENST00000790878.1	AC087239.1	158	-23.73	158	-23.73	11904	22	528	318
hsa-miR-338-3p	ENSG00000282977	ENST00000634357.1	PCBP2-OT1	146	-11.45	146	-11.45	11911	22	590	219
hsa-miR-338-3p	ENSG00000255794	ENST00000640149.1	RMST	308	-40.5	163	-20.56	11918	22	2844	1595
hsa-miR-338-3p	ENSG00000255794	ENST00000538559.6	RMST	163	-19.94	163	-19.94	11920	22	2598	1778
hsa-miR-338-3p	ENSG00000255794	ENST00000639542.1	RMST	308	-40.5	163	-20.56	11923	22	3269	2020
hsa-miR-338-3p	ENSG00000255794	ENST00000665975.1	RMST	163	-19.94	163	-19.94	11924	22	2299	1641
hsa-miR-338-3p	ENSG00000255794	ENST00000774535.1	RMST	163	-19.94	163	-19.94	11928	22	2146	1214
hsa-miR-338-3p	ENSG00000255794	ENST00000547946.2	RMST	308	-40.5	163	-20.56	11929	22	2407	1158
hsa-miR-338-3p	ENSG00000255794	ENST00000701029.1	RMST	163	-19.94	163	-19.94	11930	22	1982	1142
hsa-miR-338-3p	ENSG00000255794	ENST00000654331.1	RMST	163	-19.94	163	-19.94	11931	22	1794	1135
hsa-miR-338-3p	ENSG00000255794	ENST00000670745.1	RMST	308	-40.5	163	-20.56	11934	22	2278	1113
hsa-miR-338-3p	ENSG00000255794	ENST00000774530.1	RMST	308	-40.5	163	-20.56	11935	22	2659	1410
hsa-miR-338-3p	ENSG00000255794	ENST00000661686.1	RMST	163	-19.94	163	-19.94	11939	22	1666	1107
hsa-miR-338-3p	ENSG00000255794	ENST00000662330.2	RMST	308	-40.5	163	-20.56	11941	22	2184	935
hsa-miR-338-3p	ENSG00000255794	ENST00000658877.1	RMST	308	-40.5	163	-20.56	11942	22	3444	2259
hsa-miR-338-3p	ENSG00000255794	ENST00000664685.1	RMST	163	-19.94	163	-19.94	11944	22	1902	1242
hsa-miR-338-3p	ENSG00000255794	ENST00000774536.1	RMST	163	-19.94	163	-19.94	11945	22	2334	1392
hsa-miR-338-3p	ENSG00000255794	ENST00000639121.1	RMST	163	-19.94	163	-19.94	11946	22	2099	1323
hsa-miR-338-3p	ENSG00000255794	ENST00000774549.1	RMST	140	-13.21	140	-13.21	11949	22	1734	406
hsa-miR-338-3p	ENSG00000255794	ENST00000774554.1	RMST	140	-13.21	140	-13.21	11951	22	1429	394
hsa-miR-338-3p	ENSG00000255794	ENST00000693044.2	RMST	308	-40.5	163	-20.56	11952	22	2234	985
hsa-miR-338-3p	ENSG00000255794	ENST00000774532.1	RMST	308	-40.5	163	-20.56	11953	22	2352	1108
hsa-miR-338-3p	ENSG00000255794	ENST00000687565.2	RMST	448	-53.71	163	-20.56	11954	22	2833	1584
hsa-miR-338-3p	ENSG00000255794	ENST00000664656.2	RMST	163	-19.94	163	-19.94	11955	22	1878	1102
hsa-miR-338-3p	ENSG00000255794	ENST00000663509.2	RMST	303	-33.15	163	-19.94	11956	22	1847	1567
hsa-miR-338-3p	ENSG00000255794	ENST00000774531.1	RMST	308	-40.5	163	-20.56	11957	22	2199	950
hsa-miR-338-3p	ENSG00000255794	ENST00000660138.2	RMST	448	-53.71	163	-20.56	11958	22	2707	1456
hsa-miR-338-3p	ENSG00000255794	ENST00000690227.1	RMST	448	-53.71	163	-20.56	11959	22	2945	1698
hsa-miR-338-3p	ENSG00000255794	ENST00000774537.1	RMST	303	-33.15	163	-19.94	11960	22	2347	1562
hsa-miR-338-3p	ENSG00000255794	ENST00000774546.1	RMST	140	-13.21	140	-13.21	11961	22	2454	347
hsa-miR-338-3p	ENSG00000255794	ENST00000666798.2	RMST	140	-13.21	140	-13.21	11962	22	2564	347
hsa-miR-338-3p	ENSG00000255794	ENST00000774533.1	RMST	303	-33.15	163	-19.94	11963	22	2077	1416
hsa-miR-338-3p	ENSG00000255794	ENST00000548886.3	RMST	448	-53.71	163	-20.56	11964	22	2657	1408
hsa-miR-338-3p	ENSG00000255794	ENST00000690936.1	RMST	140	-13.21	140	-13.21	11965	22	1548	321
hsa-miR-338-3p	ENSG00000255794	ENST00000670160.1	RMST	303	-33.15	163	-19.94	11966	22	1474	1209
hsa-miR-338-3p	ENSG00000255794	ENST00000687746.1	RMST	140	-13.21	140	-13.21	11967	22	2480	246
hsa-miR-338-3p	ENSG00000255794	ENST00000774534.1	RMST	303	-33.15	163	-19.94	11968	22	1118	457
hsa-miR-338-3p	ENSG00000255794	ENST00000662502.1	RMST	163	-19.94	163	-19.94	11969	22	1587	938
hsa-miR-338-3p	ENSG00000255794	ENST00000656448.1	RMST	308	-40.5	163	-20.56	11970	22	2061	812
hsa-miR-338-3p	ENSG00000255794	ENST00000666664.1	RMST	308	-40.5	163	-20.56	11972	22	2049	1114
hsa-miR-338-3p	ENSG00000255794	ENST00000774542.1	RMST	163	-19.94	163	-19.94	11975	22	1671	831
hsa-miR-338-3p	ENSG00000255794	ENST00000663659.1	RMST	163	-19.94	163	-19.94	11976	22	793	483
hsa-miR-338-3p	ENSG00000255794	ENST00000663411.1	RMST	163	-19.94	163	-19.94	11977	22	2264	1738
hsa-miR-338-3p	ENSG00000255794	ENST00000552411.2	RMST	163	-19.94	163	-19.94	11978	22	1306	421
hsa-miR-338-3p	ENSG00000255794	ENST00000774550.1	RMST	308	-40.5	163	-20.56	11979	22	1337	88
hsa-miR-338-3p	ENSG00000255794	ENST00000774555.1	RMST	145	-20.56	145	-20.56	11980	22	1142	518
hsa-miR-338-3p	ENSG00000273784	ENST00000740525.1	AL137058.2	140	-14.77	140	-14.77	12006	22	1357	824
hsa-miR-338-3p	ENSG00000224243	ENST00000732632.1	SOX1-OT	154	-15.71	154	-15.71	12037	22	573	14
hsa-miR-338-3p	ENSG00000224243	ENST00000732634.1	SOX1-OT	150	-12.63	150	-12.63	12038	22	685	139
hsa-miR-338-3p	ENSG00000224243	ENST00000732636.1	SOX1-OT	150	-12.63	150	-12.63	12040	22	680	112
hsa-miR-338-3p	ENSG00000224243	ENST00000732637.1	SOX1-OT	150	-12.63	150	-12.63	12041	22	521	76
hsa-miR-338-3p	ENSG00000260830	ENST00000565098.3	AL135744.1	145	-18.79	145	-18.79	12045	22	1587	1169
hsa-miR-338-3p	ENSG00000260830	ENST00000839891.1	AL135744.1	145	-18.79	145	-18.79	12046	22	874	299
hsa-miR-338-3p	ENSG00000260830	ENST00000839892.1	AL135744.1	293	-36.22	148	-18.79	12047	22	867	292
hsa-miR-338-3p	ENSG00000247970	ENST00000502101.4	AL160313.1	288	-32.29	148	-18.95	12049	22	1107	908
hsa-miR-338-3p	ENSG00000259211	ENST00000559730.1	AC013356.2	289	-38.13	146	-22.46	12070	22	729	368
hsa-miR-338-3p	ENSG00000255571	ENST00000536780.6	MIR9-3HG	281	-34.88	141	-21.6	12074	22	4778	3566
hsa-miR-338-3p	ENSG00000255571	ENST00000654171.1	MIR9-3HG	281	-34.88	141	-21.6	12075	22	4350	3140
hsa-miR-338-3p	ENSG00000255571	ENST00000657897.1	MIR9-3HG	433	-51.4	152	-21.6	12077	22	4308	623
hsa-miR-338-3p	ENSG00000255571	ENST00000661040.1	MIR9-3HG	281	-34.88	141	-21.6	12078	22	4092	2883
hsa-miR-338-3p	ENSG00000255571	ENST00000654184.1	MIR9-3HG	281	-34.88	141	-21.6	12079	22	4201	2991
hsa-miR-338-3p	ENSG00000255571	ENST00000658194.1	MIR9-3HG	433	-51.4	152	-21.6	12080	22	4266	303
hsa-miR-338-3p	ENSG00000255571	ENST00000661036.1	MIR9-3HG	281	-34.88	141	-21.6	12081	22	4225	3016
hsa-miR-338-3p	ENSG00000255571	ENST00000659235.1	MIR9-3HG	433	-51.4	152	-21.6	12082	22	4269	503
hsa-miR-338-3p	ENSG00000255571	ENST00000669499.1	MIR9-3HG	433	-51.4	152	-21.6	12083	22	3818	133
hsa-miR-338-3p	ENSG00000255571	ENST00000654079.1	MIR9-3HG	281	-34.88	141	-21.6	12084	22	4019	2810
hsa-miR-338-3p	ENSG00000255571	ENST00000670779.1	MIR9-3HG	281	-34.88	141	-21.6	12085	22	3960	2748
hsa-miR-338-3p	ENSG00000255571	ENST00000658764.1	MIR9-3HG	281	-34.88	141	-21.6	12086	22	4175	2966
hsa-miR-338-3p	ENSG00000255571	ENST00000655673.1	MIR9-3HG	152	-16.52	152	-16.52	12087	22	1098	466
hsa-miR-338-3p	ENSG00000255571	ENST00000659850.1	MIR9-3HG	152	-16.52	152	-16.52	12089	22	1080	451
hsa-miR-338-3p	ENSG00000255571	ENST00000669037.1	MIR9-3HG	297	-30.9	152	-16.52	12092	22	1195	554
hsa-miR-338-3p	ENSG00000255571	ENST00000666816.1	MIR9-3HG	281	-34.88	141	-21.6	12094	22	4053	2844
hsa-miR-338-3p	ENSG00000255571	ENST00000658770.1	MIR9-3HG	281	-34.88	141	-21.6	12095	22	3971	2762
hsa-miR-338-3p	ENSG00000255571	ENST00000667285.1	MIR9-3HG	140	-13.28	140	-13.28	12097	22	1889	1434
hsa-miR-338-3p	ENSG00000255571	ENST00000668524.1	MIR9-3HG	140	-13.28	140	-13.28	12098	22	1971	1516
hsa-miR-338-3p	ENSG00000255571	ENST00000558692.6	MIR9-3HG	152	-16.52	152	-16.52	12102	22	927	294
hsa-miR-338-3p	ENSG00000255571	ENST00000558754.6	MIR9-3HG	140	-13.28	140	-13.28	12105	22	2759	1977
hsa-miR-338-3p	ENSG00000255571	ENST00000669098.1	MIR9-3HG	281	-34.88	141	-21.6	12106	22	5427	4218
hsa-miR-338-3p	ENSG00000255571	ENST00000538734.7	MIR9-3HG	292	-29.8	152	-16.52	12108	22	1867	120
hsa-miR-338-3p	ENSG00000255571	ENST00000669645.1	MIR9-3HG	140	-13.28	140	-13.28	12109	22	1904	1454
hsa-miR-338-3p	ENSG00000255571	ENST00000660601.1	MIR9-3HG	140	-13.28	140	-13.28	12110	22	2033	1578
hsa-miR-338-3p	ENSG00000255571	ENST00000660922.1	MIR9-3HG	140	-13.28	140	-13.28	12111	22	1827	1376
hsa-miR-338-3p	ENSG00000255571	ENST00000670238.1	MIR9-3HG	140	-13.28	140	-13.28	12112	22	1994	1541
hsa-miR-338-3p	ENSG00000255571	ENST00000546186.3	MIR9-3HG	140	-13.28	140	-13.28	12113	22	1746	1346
hsa-miR-338-3p	ENSG00000255571	ENST00000655914.1	MIR9-3HG	152	-16.52	152	-16.52	12115	22	1319	207
hsa-miR-338-3p	ENSG00000255571	ENST00000662136.1	MIR9-3HG	140	-13.28	140	-13.28	12119	22	1838	1394
hsa-miR-338-3p	ENSG00000255571	ENST00000664345.1	MIR9-3HG	145	-14.38	145	-14.38	12121	22	910	129
hsa-miR-338-3p	ENSG00000255571	ENST00000561037.5	MIR9-3HG	297	-30.9	152	-16.52	12123	22	779	295
hsa-miR-338-3p	ENSG00000255571	ENST00000664594.1	MIR9-3HG	297	-30.9	152	-16.52	12124	22	921	291
hsa-miR-338-3p	ENSG00000255571	ENST00000671075.1	MIR9-3HG	578	-65.78	152	-21.6	12125	22	5094	1050
hsa-miR-338-3p	ENSG00000255571	ENST00000663717.1	MIR9-3HG	578	-65.78	152	-21.6	12126	22	5607	803
hsa-miR-338-3p	ENSG00000255571	ENST00000671447.1	MIR9-3HG	433	-51.4	152	-21.6	12127	22	4989	182
hsa-miR-338-3p	ENSG00000260807	ENST00000711639.1	AC009041.2	143	-17.94	143	-17.94	12133	22	4730	3220
hsa-miR-338-3p	ENSG00000260807	ENST00000711633.1	AC009041.2	143	-17.94	143	-17.94	12137	22	3399	1889
hsa-miR-338-3p	ENSG00000261505	ENST00000567829.1	AL031714.1	172	-24.09	172	-24.09	12157	22	2926	2196
hsa-miR-338-3p	ENSG00000213599	ENST00000566712.2	SLX1A-SULT1A3	140	-12.05	140	-12.05	12173	22	2380	752
hsa-miR-338-3p	ENSG00000262903	ENST00000575741.1	AC027796.4	140	-22.15	140	-22.15	12198	22	874	276
hsa-miR-338-3p	ENSG00000274565	ENST00000611274.2	AC080038.1	156	-22.93	156	-22.93	12210	22	1270	840
hsa-miR-338-3p	ENSG00000274565	ENST00000723652.1	AC080038.1	156	-22.93	156	-22.93	12211	22	873	474
hsa-miR-338-3p	ENSG00000274565	ENST00000723651.1	AC080038.1	156	-22.93	156	-22.93	12212	22	954	555
hsa-miR-338-3p	ENSG00000274565	ENST00000723653.1	AC080038.1	156	-22.93	156	-22.93	12213	22	834	504
hsa-miR-338-3p	ENSG00000262877	ENST00000571724.4	AC110285.2	140	-17.6	140	-17.6	12224	22	2501	2002
hsa-miR-338-3p	ENSG00000262877	ENST00000841501.1	AC110285.2	162	-26.86	162	-26.86	12227	22	893	92
hsa-miR-338-3p	ENSG00000267519	ENST00000587762.2	AC020916.1	1138	-131.29	151	-20.65	12344	22	19049	2252
hsa-miR-338-3p	ENSG00000214049	ENST00000645805.1	UCA1	142	-16.87	142	-16.87	12347	22	2365	747
hsa-miR-338-3p	ENSG00000214049	ENST00000644567.3	UCA1	142	-16.87	142	-16.87	12348	22	2638	829
hsa-miR-338-3p	ENSG00000214049	ENST00000718453.1	UCA1	142	-16.87	142	-16.87	12349	22	7791	2734
hsa-miR-338-3p	ENSG00000214049	ENST00000645764.2	UCA1	142	-16.87	142	-16.87	12350	22	2001	813
hsa-miR-338-3p	ENSG00000214049	ENST00000644174.2	UCA1	142	-16.87	142	-16.87	12351	22	2688	776
hsa-miR-338-3p	ENSG00000214049	ENST00000643567.2	UCA1	142	-16.87	142	-16.87	12352	22	619	330
hsa-miR-338-3p	ENSG00000214049	ENST00000646494.2	UCA1	142	-16.87	142	-16.87	12353	22	1189	288
hsa-miR-338-3p	ENSG00000214049	ENST00000670862.2	UCA1	142	-16.87	142	-16.87	12354	22	1199	297
hsa-miR-338-3p	ENSG00000214049	ENST00000659568.2	UCA1	142	-16.87	142	-16.87	12355	22	1293	288
hsa-miR-338-3p	ENSG00000214049	ENST00000642256.3	UCA1	142	-16.87	142	-16.87	12356	22	2292	467
hsa-miR-338-3p	ENSG00000214049	ENST00000644962.2	UCA1	142	-16.87	142	-16.87	12357	22	1301	419
hsa-miR-338-3p	ENSG00000214049	ENST00000655708.2	UCA1	142	-16.87	142	-16.87	12358	22	1939	293
hsa-miR-338-3p	ENSG00000214049	ENST00000397381.7	UCA1	142	-16.87	142	-16.87	12359	22	2184	419
hsa-miR-338-3p	ENSG00000214049	ENST00000645877.1	UCA1	142	-16.87	142	-16.87	12360	22	720	291
hsa-miR-338-3p	ENSG00000214049	ENST00000645389.2	UCA1	142	-16.87	142	-16.87	12361	22	878	335
hsa-miR-338-3p	ENSG00000214049	ENST00000643552.2	UCA1	142	-16.87	142	-16.87	12362	22	1465	461
hsa-miR-338-3p	ENSG00000214049	ENST00000655191.2	UCA1	142	-16.87	142	-16.87	12363	22	1991	403
hsa-miR-338-3p	ENSG00000214049	ENST00000658824.2	UCA1	142	-16.87	142	-16.87	12364	22	554	266
hsa-miR-338-3p	ENSG00000214049	ENST00000644845.3	UCA1	142	-16.87	142	-16.87	12365	22	1348	447
hsa-miR-338-3p	ENSG00000214049	ENST00000644796.3	UCA1	142	-16.87	142	-16.87	12366	22	1320	400
hsa-miR-338-3p	ENSG00000214049	ENST00000642440.3	UCA1	142	-16.87	142	-16.87	12367	22	1120	396
hsa-miR-338-3p	ENSG00000214049	ENST00000757092.1	UCA1	142	-16.87	142	-16.87	12368	22	1008	260
hsa-miR-338-3p	ENSG00000214049	ENST00000645177.2	UCA1	142	-16.87	142	-16.87	12369	22	1840	395
hsa-miR-338-3p	ENSG00000214049	ENST00000644400.2	UCA1	142	-16.87	142	-16.87	12370	22	1707	395
hsa-miR-338-3p	ENSG00000214049	ENST00000757094.1	UCA1	142	-16.87	142	-16.87	12371	22	1484	392
hsa-miR-338-3p	ENSG00000214049	ENST00000757093.1	UCA1	142	-16.87	142	-16.87	12373	22	1033	266
hsa-miR-338-3p	ENSG00000214049	ENST00000645708.3	UCA1	142	-16.87	142	-16.87	12374	22	1378	392
hsa-miR-338-3p	ENSG00000214049	ENST00000666830.2	UCA1	142	-16.87	142	-16.87	12375	22	1921	392
hsa-miR-338-3p	ENSG00000214049	ENST00000671188.1	UCA1	142	-16.87	142	-16.87	12376	22	1287	389
hsa-miR-338-3p	ENSG00000214049	ENST00000757091.1	UCA1	142	-16.87	142	-16.87	12377	22	536	245
hsa-miR-338-3p	ENSG00000214049	ENST00000647185.2	UCA1	142	-16.87	142	-16.87	12378	22	1299	359
hsa-miR-338-3p	ENSG00000214049	ENST00000646397.2	UCA1	142	-16.87	142	-16.87	12380	22	1219	318
hsa-miR-338-3p	ENSG00000214049	ENST00000644590.1	UCA1	142	-16.87	142	-16.87	12381	22	864	260
hsa-miR-338-3p	ENSG00000214049	ENST00000643846.1	UCA1	142	-16.87	142	-16.87	12382	22	1084	260
hsa-miR-338-3p	ENSG00000214049	ENST00000644103.1	UCA1	142	-16.87	142	-16.87	12383	22	1337	260
hsa-miR-338-3p	ENSG00000214049	ENST00000644730.1	UCA1	142	-16.87	142	-16.87	12384	22	1122	260
hsa-miR-338-3p	ENSG00000214049	ENST00000646128.1	UCA1	142	-16.87	142	-16.87	12385	22	1174	307
hsa-miR-338-3p	ENSG00000214049	ENST00000645821.2	UCA1	142	-16.87	142	-16.87	12386	22	594	307
hsa-miR-338-3p	ENSG00000214049	ENST00000645221.1	UCA1	142	-16.87	142	-16.87	12387	22	1191	260
hsa-miR-338-3p	ENSG00000214049	ENST00000645251.1	UCA1	142	-16.87	142	-16.87	12388	22	1155	260
hsa-miR-338-3p	ENSG00000214049	ENST00000665604.1	UCA1	142	-16.87	142	-16.87	12389	22	926	260
hsa-miR-338-3p	ENSG00000214049	ENST00000644502.1	UCA1	142	-16.87	142	-16.87	12391	22	855	257
hsa-miR-338-3p	ENSG00000214049	ENST00000664784.2	UCA1	142	-16.87	142	-16.87	12392	22	600	314
hsa-miR-338-3p	ENSG00000214049	ENST00000757095.1	UCA1	142	-16.87	142	-16.87	12393	22	520	232
hsa-miR-338-3p	ENSG00000214049	ENST00000642269.2	UCA1	142	-16.87	142	-16.87	12394	22	1125	121
hsa-miR-338-3p	ENSG00000214049	ENST00000645156.2	UCA1	142	-16.87	142	-16.87	12395	22	1733	729
hsa-miR-338-3p	ENSG00000214049	ENST00000589333.3	UCA1	142	-16.87	142	-16.87	12396	22	957	55
hsa-miR-338-3p	ENSG00000268555	ENST00000789589.1	AC123912.4	147	-14.95	147	-14.95	12402	22	848	393
hsa-miR-338-3p	ENSG00000268555	ENST00000789591.1	AC123912.4	301	-32.58	154	-17.63	12403	22	1204	1053
hsa-miR-338-3p	ENSG00000277383	ENST00000611423.3	AC010331.1	154	-19.34	154	-19.34	12406	22	837	98
hsa-miR-338-3p	ENSG00000268047	ENST00000835683.1	AC018766.1	150	-17.62	150	-17.62	12407	22	669	502
hsa-miR-338-3p	ENSG00000268047	ENST00000835682.1	AC018766.1	150	-17.62	150	-17.62	12408	22	1086	919
hsa-miR-338-3p	ENSG00000205181	ENST00000379053.5	LINC00654	149	-12.98	149	-12.98	12426	22	6118	2665
hsa-miR-338-3p	ENSG00000205181	ENST00000664106.1	LINC00654	149	-12.98	149	-12.98	12427	22	2796	2712
hsa-miR-338-3p	ENSG00000237767	ENST00000664271.2	LINC01370	303	-36	163	-22.17	12485	22	2512	1034
hsa-miR-338-3p	ENSG00000279094	ENST00000743697.1	LINC01670	150	-23.49	150	-23.49	12543	22	570	7
hsa-miR-338-3p	ENSG00000279094	ENST00000743699.1	LINC01670	150	-23.49	150	-23.49	12545	22	1243	1
hsa-miR-338-3p	ENSG00000279094	ENST00000743698.1	LINC01670	150	-23.49	150	-23.49	12546	22	1105	49
hsa-miR-338-3p	ENSG00000279094	ENST00000624261.2	LINC01670	150	-23.49	150	-23.49	12547	22	1127	60
hsa-miR-338-3p	ENSG00000279094	ENST00000623227.2	LINC01670	150	-23.49	150	-23.49	12548	22	1324	68
hsa-miR-338-3p	ENSG00000279094	ENST00000743702.1	LINC01670	150	-23.49	150	-23.49	12549	22	972	16
hsa-miR-338-3p	ENSG00000279094	ENST00000743701.1	LINC01670	150	-23.49	150	-23.49	12550	22	1035	51
hsa-miR-338-3p	ENSG00000279094	ENST00000624859.4	LINC01670	150	-23.49	150	-23.49	12551	22	1078	59
hsa-miR-338-3p	ENSG00000279094	ENST00000743703.1	LINC01670	150	-23.49	150	-23.49	12553	22	970	14
hsa-miR-338-3p	ENSG00000236384	ENST00000782644.1	LINC00479	141	-14.56	141	-14.56	12555	22	1208	518
hsa-miR-338-3p	ENSG00000236384	ENST00000412102.5	LINC00479	141	-14.56	141	-14.56	12557	22	2033	1402
hsa-miR-338-3p	ENSG00000225783	ENST00000656640.1	MIAT	145	-18.81	145	-18.81	12572	22	944	839
hsa-miR-338-3p	ENSG00000225783	ENST00000717175.1	MIAT	145	-18.81	145	-18.81	12573	22	962	612
hsa-miR-338-3p	ENSG00000225783	ENST00000643270.1	MIAT	443	-56.74	150	-21.85	12574	22	3760	1586
hsa-miR-338-3p	ENSG00000225783	ENST00000643002.1	MIAT	145	-18.81	145	-18.81	12577	22	911	590
hsa-miR-338-3p	ENSG00000225783	ENST00000440347.5	MIAT	145	-18.81	145	-18.81	12579	22	543	67
hsa-miR-338-3p	ENSG00000225783	ENST00000450203.6	MIAT	443	-56.74	150	-21.85	12580	22	2290	1057
hsa-miR-338-3p	ENSG00000225783	ENST00000430483.5	MIAT	145	-18.81	145	-18.81	12581	22	593	50
hsa-miR-338-3p	ENSG00000225783	ENST00000717176.1	MIAT	145	-16.08	145	-16.08	12582	22	534	1
hsa-miR-338-3p	ENSG00000225783	ENST00000436238.6	MIAT	150	-21.85	150	-21.85	12585	22	1236	1074
hsa-miR-338-3p	ENSG00000225783	ENST00000452429.6	MIAT	150	-21.85	150	-21.85	12587	22	1852	1316
hsa-miR-338-3p	ENSG00000225783	ENST00000616469.4	MIAT	589	-72.79	151	-21.85	12595	22	10069	3924
hsa-miR-338-3p	ENSG00000225783	ENST00000717210.1	MIAT	148	-16.08	148	-16.08	12599	22	1059	970
hsa-miR-338-3p	ENSG00000225783	ENST00000717211.1	MIAT	590	-73.94	151	-21.85	12600	22	4185	3891
hsa-miR-338-3p	ENSG00000225783	ENST00000613780.4	MIAT	737	-88.87	151	-21.85	12601	22	10143	3998
hsa-miR-338-3p	ENSG00000225783	ENST00000616213.4	MIAT	589	-72.79	151	-21.85	12602	22	9943	3798
hsa-miR-338-3p	ENSG00000225783	ENST00000717188.1	MIAT	298	-37.93	150	-21.85	12606	22	2322	1119
hsa-miR-338-3p	ENSG00000225783	ENST00000717190.1	MIAT	150	-21.85	150	-21.85	12608	22	1226	1164
hsa-miR-338-3p	ENSG00000225783	ENST00000458302.6	MIAT	298	-37.93	150	-21.85	12609	22	2875	1125
hsa-miR-338-3p	ENSG00000225783	ENST00000717200.1	MIAT	150	-21.85	150	-21.85	12610	22	1963	1007
hsa-miR-338-3p	ENSG00000225783	ENST00000717191.1	MIAT	298	-37.93	150	-21.85	12611	22	2206	1007
hsa-miR-338-3p	ENSG00000225783	ENST00000453023.2	MIAT	298	-37.93	150	-21.85	12612	22	3225	1192
hsa-miR-338-3p	ENSG00000225783	ENST00000717201.1	MIAT	443	-55.86	151	-21.85	12613	22	4016	3730
hsa-miR-338-3p	ENSG00000225783	ENST00000620145.6	MIAT	737	-88.87	151	-21.85	12614	22	10004	3856
hsa-miR-338-3p	ENSG00000225783	ENST00000665574.1	MIAT	443	-55.86	151	-21.85	12617	22	4019	3750
hsa-miR-338-3p	ENSG00000225783	ENST00000717202.1	MIAT	148	-16.08	148	-16.08	12618	22	1196	251
hsa-miR-338-3p	ENSG00000281849	ENST00000717455.1	AL732314.6	284	-32.2	144	-16.68	12648	22	1871	324
hsa-miR-338-3p	ENSG00000281849	ENST00000717456.1	AL732314.6	144	-15.52	144	-15.52	12649	22	2543	554
hsa-miR-338-3p	ENSG00000281849	ENST00000717458.1	AL732314.6	144	-15.52	144	-15.52	12651	22	1259	364
hsa-miR-338-3p	ENSG00000223749	ENST00000673627.2	MIR503HG	147	-17.48	147	-17.48	12655	22	1329	1034
hsa-miR-338-3p	ENSG00000223749	ENST00000414769.3	MIR503HG	147	-17.48	147	-17.48	12656	22	1212	918
hsa-miR-338-3p	ENSG00000223749	ENST00000440570.7	MIR503HG	147	-17.48	147	-17.48	12657	22	1140	847
hsa-miR-338-3p	ENSG00000223749	ENST00000666697.2	MIR503HG	147	-17.48	147	-17.48	12658	22	1055	965
hsa-miR-338-3p	ENSG00000223749	ENST00000457876.7	MIR503HG	147	-17.48	147	-17.48	12659	22	1715	1625
hsa-miR-338-3p	ENSG00000223749	ENST00000809848.1	MIR503HG	147	-17.48	147	-17.48	12660	22	860	770
hsa-miR-338-3p	ENSG00000223749	ENST00000809845.1	MIR503HG	147	-17.48	147	-17.48	12661	22	930	853
hsa-miR-338-3p	ENSG00000223749	ENST00000445415.3	MIR503HG	147	-17.48	147	-17.48	12662	22	973	897
hsa-miR-338-3p	ENSG00000223749	ENST00000809850.1	MIR503HG	147	-17.48	147	-17.48	12663	22	838	762
hsa-miR-338-3p	ENSG00000223749	ENST00000809846.1	MIR503HG	147	-17.48	147	-17.48	12664	22	863	787
hsa-miR-338-3p	ENSG00000223749	ENST00000670930.1	MIR503HG	147	-17.48	147	-17.48	12665	22	813	738
hsa-miR-338-3p	ENSG00000223749	ENST00000655068.1	MIR503HG	287	-33.71	147	-17.48	12666	22	1320	1247
hsa-miR-338-3p	ENSG00000223749	ENST00000659680.2	MIR503HG	140	-16.23	140	-16.23	12668	22	1242	256
hsa-miR-338-3p	ENSG00000223749	ENST00000441492.3	MIR503HG	140	-16.23	140	-16.23	12669	22	651	152
hsa-miR-338-3p	ENSG00000223749	ENST00000809853.1	MIR503HG	140	-16.23	140	-16.23	12673	22	505	29
hsa-miR-338-3p	ENSG00000238039	ENST00000370438.2	AC244197.2	145	-17.42	145	-17.42	12678	22	655	273
hsa-miR-194-5p	ENSG00000225880	ENST00000743821.1	LINC00115	143	-24.01	143	-24.01	12688	22	2153	684
hsa-miR-194-5p	ENSG00000225880	ENST00000743866.1	LINC00115	143	-24.01	143	-24.01	12704	22	929	646
hsa-miR-194-5p	ENSG00000225880	ENST00000743850.1	LINC00115	141	-13.46	141	-13.46	12732	22	971	531
hsa-miR-194-5p	ENSG00000225880	ENST00000743849.1	LINC00115	141	-13.46	141	-13.46	12733	22	877	437
hsa-miR-194-5p	ENSG00000225880	ENST00000743848.1	LINC00115	141	-13.46	141	-13.46	12734	22	1033	593
hsa-miR-194-5p	ENSG00000225880	ENST00000743847.1	LINC00115	141	-13.46	141	-13.46	12735	22	1036	596
hsa-miR-194-5p	ENSG00000225880	ENST00000743846.1	LINC00115	141	-13.46	141	-13.46	12736	22	949	509
hsa-miR-194-5p	ENSG00000225880	ENST00000447500.5	LINC00115	141	-13.46	141	-13.46	12737	22	2007	1572
hsa-miR-194-5p	ENSG00000225880	ENST00000743845.1	LINC00115	141	-13.46	141	-13.46	12738	22	1303	868
hsa-miR-194-5p	ENSG00000225880	ENST00000743844.1	LINC00115	141	-13.46	141	-13.46	12739	22	1326	891
hsa-miR-194-5p	ENSG00000225880	ENST00000743853.1	LINC00115	141	-13.46	141	-13.46	12740	22	905	474
hsa-miR-194-5p	ENSG00000225880	ENST00000743852.1	LINC00115	141	-13.46	141	-13.46	12741	22	858	427
hsa-miR-194-5p	ENSG00000225880	ENST00000744079.1	LINC00115	141	-13.46	141	-13.46	12742	22	1653	1456
hsa-miR-194-5p	ENSG00000225880	ENST00000743868.1	LINC00115	141	-13.46	141	-13.46	12743	22	563	449
hsa-miR-194-5p	ENSG00000225880	ENST00000473798.3	LINC00115	149	-12.7	149	-12.7	12767	22	3602	1748
hsa-miR-194-5p	ENSG00000116652	ENST00000371086.3	DLEU2L	289	-25.19	149	-13.66	12825	22	3555	2331
hsa-miR-194-5p	ENSG00000235407	ENST00000457402.2	CYMP-AS1	140	-13.16	140	-13.16	12850	22	2374	2138
hsa-miR-194-5p	ENSG00000125462	ENST00000476966.6	C1orf61	142	-12.92	142	-12.92	13090	22	2704	2393
hsa-miR-194-5p	ENSG00000125462	ENST00000452465.2	C1orf61	151	-11.34	151	-11.34	13110	22	857	751
hsa-miR-194-5p	ENSG00000228857	ENST00000827885.1	AC104653.1	140	-13.82	140	-13.82	13206	22	644	212
hsa-miR-194-5p	ENSG00000228857	ENST00000827883.1	AC104653.1	140	-13.82	140	-13.82	13208	22	536	217
hsa-miR-194-5p	ENSG00000230838	ENST00000768239.1	LINC01614	141	-10.23	141	-10.23	13265	22	2088	1948
hsa-miR-194-5p	ENSG00000230838	ENST00000768240.1	LINC01614	141	-10.23	141	-10.23	13266	22	2138	1998
hsa-miR-194-5p	ENSG00000230838	ENST00000415479.3	LINC01614	141	-10.23	141	-10.23	13267	22	2294	2151
hsa-miR-194-5p	ENSG00000230838	ENST00000768241.1	LINC01614	141	-10.23	141	-10.23	13268	22	1978	1841
hsa-miR-194-5p	ENSG00000272677	ENST00000609552.3	AC124016.1	141	-20.89	141	-20.89	13301	22	1465	131
hsa-miR-194-5p	ENSG00000272677	ENST00000609575.3	AC124016.1	141	-20.89	141	-20.89	13302	22	838	25
hsa-miR-194-5p	ENSG00000271474	ENST00000605849.2	AC106881.1	141	-10.55	141	-10.55	13306	22	3534	1574
hsa-miR-194-5p	ENSG00000246090	ENST00000757801.1	AP002026.1	150	-18.31	150	-18.31	13311	22	1603	671
hsa-miR-194-5p	ENSG00000246090	ENST00000757802.1	AP002026.1	150	-18.31	150	-18.31	13347	22	2169	1231
hsa-miR-194-5p	ENSG00000246090	ENST00000506454.2	AP002026.1	150	-18.31	150	-18.31	13363	22	751	277
hsa-miR-194-5p	ENSG00000186493	ENST00000647681.1	C5orf38	142	-19.37	142	-19.37	13469	22	890	332
hsa-miR-194-5p	ENSG00000186493	ENST00000650439.1	C5orf38	142	-19.37	142	-19.37	13472	22	509	252
hsa-miR-194-5p	ENSG00000186493	ENST00000515640.5	C5orf38	288	-35.74	146	-19.37	13473	22	1441	1391
hsa-miR-194-5p	ENSG00000186493	ENST00000397835.4	C5orf38	142	-19.37	142	-19.37	13474	22	681	215
hsa-miR-194-5p	ENSG00000245526	ENST00000506041.2	LINC00461	140	-18.69	140	-18.69	13512	22	1626	254
hsa-miR-194-5p	ENSG00000245526	ENST00000787111.1	LINC00461	140	-18.69	140	-18.69	13515	22	1014	519
hsa-miR-194-5p	ENSG00000245526	ENST00000669424.1	LINC00461	433	-41.75	153	-15.39	13525	22	8262	6098
hsa-miR-194-5p	ENSG00000245526	ENST00000670494.2	LINC00461	433	-41.75	153	-15.39	13526	22	7579	5481
hsa-miR-194-5p	ENSG00000245526	ENST00000664240.2	LINC00461	433	-41.75	153	-15.39	13527	22	6250	5584
hsa-miR-194-5p	ENSG00000245526	ENST00000662060.1	LINC00461	280	-28.83	140	-15.39	13528	22	5116	3269
hsa-miR-194-5p	ENSG00000245526	ENST00000665062.2	LINC00461	280	-28.83	140	-15.39	13529	22	4332	3412
hsa-miR-194-5p	ENSG00000245526	ENST00000665865.2	LINC00461	280	-28.83	140	-15.39	13530	22	4522	3607
hsa-miR-194-5p	ENSG00000245526	ENST00000663994.2	LINC00461	143	-26.62	143	-26.62	13577	22	1158	526
hsa-miR-194-5p	ENSG00000248663	ENST00000828615.1	LINC00992	159	-20.18	159	-20.18	13618	22	899	5
hsa-miR-194-5p	ENSG00000248663	ENST00000504107.3	LINC00992	159	-20.18	159	-20.18	13619	22	942	5
hsa-miR-194-5p	ENSG00000248663	ENST00000828619.1	LINC00992	158	-17.65	158	-17.65	13620	22	997	1
hsa-miR-194-5p	ENSG00000248663	ENST00000828616.1	LINC00992	153	-12.56	153	-12.56	13621	22	527	1
hsa-miR-194-5p	ENSG00000248663	ENST00000828614.1	LINC00992	147	-12.2	147	-12.2	13622	22	817	1
hsa-miR-194-5p	ENSG00000270419	ENST00000816707.1	CAHM	140	-11.48	140	-11.48	13668	22	587	518
hsa-miR-194-5p	ENSG00000272843	ENST00000608799.2	AC211476.2	140	-12.03	140	-12.03	13727	22	713	321
hsa-miR-194-5p	ENSG00000239569	ENST00000787481.1	KMT2E-AS1	143	-21.6	143	-21.6	13794	22	1091	1
hsa-miR-194-5p	ENSG00000239569	ENST00000687790.3	KMT2E-AS1	144	-16.03	144	-16.03	13821	22	1442	1056
hsa-miR-194-5p	ENSG00000239569	ENST00000655204.4	KMT2E-AS1	292	-44.41	148	-28.38	13822	22	1116	20
hsa-miR-194-5p	ENSG00000239569	ENST00000687367.2	KMT2E-AS1	144	-16.03	144	-16.03	13824	22	2452	2071
hsa-miR-194-5p	ENSG00000239569	ENST00000787511.1	KMT2E-AS1	144	-16.03	144	-16.03	13825	22	1180	799
hsa-miR-194-5p	ENSG00000239569	ENST00000702542.2	KMT2E-AS1	144	-16.03	144	-16.03	13826	22	1457	1076
hsa-miR-194-5p	ENSG00000239569	ENST00000787508.1	KMT2E-AS1	144	-16.03	144	-16.03	13827	22	1150	769
hsa-miR-194-5p	ENSG00000239569	ENST00000715774.1	KMT2E-AS1	144	-16.03	144	-16.03	13828	22	1082	701
hsa-miR-194-5p	ENSG00000239569	ENST00000715773.1	KMT2E-AS1	144	-16.03	144	-16.03	13829	22	1168	787
hsa-miR-194-5p	ENSG00000239569	ENST00000787509.1	KMT2E-AS1	144	-16.03	144	-16.03	13831	22	2161	1784
hsa-miR-194-5p	ENSG00000239569	ENST00000445184.1	KMT2E-AS1	144	-16.03	144	-16.03	13832	22	686	661
hsa-miR-194-5p	ENSG00000239569	ENST00000690482.3	KMT2E-AS1	148	-28.38	148	-28.38	13841	22	2130	1026
hsa-miR-194-5p	ENSG00000239569	ENST00000787519.1	KMT2E-AS1	148	-28.38	148	-28.38	13842	22	633	14
hsa-miR-194-5p	ENSG00000239569	ENST00000690819.3	KMT2E-AS1	148	-28.38	148	-28.38	13846	22	4366	1050
hsa-miR-194-5p	ENSG00000254377	ENST00000521441.3	MIR124-2HG	141	-20.87	141	-20.87	13864	22	3021	2428
hsa-miR-194-5p	ENSG00000254377	ENST00000665390.2	MIR124-2HG	141	-20.87	141	-20.87	13865	22	2427	2335
hsa-miR-194-5p	ENSG00000254377	ENST00000657723.3	MIR124-2HG	141	-20.87	141	-20.87	13868	22	2392	2132
hsa-miR-194-5p	ENSG00000254377	ENST00000772496.1	MIR124-2HG	141	-20.87	141	-20.87	13869	22	2079	1987
hsa-miR-194-5p	ENSG00000254377	ENST00000663091.3	MIR124-2HG	141	-20.87	141	-20.87	13870	22	1944	1821
hsa-miR-194-5p	ENSG00000254377	ENST00000671640.1	MIR124-2HG	141	-20.87	141	-20.87	13871	22	2383	2236
hsa-miR-194-5p	ENSG00000254377	ENST00000658332.1	MIR124-2HG	141	-20.87	141	-20.87	13872	22	1947	1563
hsa-miR-194-5p	ENSG00000254377	ENST00000702091.2	MIR124-2HG	141	-20.87	141	-20.87	13873	22	1830	1105
hsa-miR-194-5p	ENSG00000254377	ENST00000689669.3	MIR124-2HG	147	-10.27	147	-10.27	13884	22	2421	26
hsa-miR-194-5p	ENSG00000254377	ENST00000772513.1	MIR124-2HG	147	-10.27	147	-10.27	13885	22	506	1
hsa-miR-194-5p	ENSG00000254377	ENST00000772507.1	MIR124-2HG	141	-20.87	141	-20.87	13890	22	2107	2015
hsa-miR-194-5p	ENSG00000254377	ENST00000519741.1	MIR124-2HG	141	-20.87	141	-20.87	13897	22	2214	2122
hsa-miR-194-5p	ENSG00000270866	ENST00000821511.1	AC067773.1	156	-12.75	156	-12.75	13899	22	937	716
hsa-miR-194-5p	ENSG00000270866	ENST00000603284.2	AC067773.1	156	-12.75	156	-12.75	13900	22	1830	1252
hsa-miR-194-5p	ENSG00000270866	ENST00000821513.1	AC067773.1	156	-12.75	156	-12.75	13901	22	1028	802
hsa-miR-194-5p	ENSG00000270866	ENST00000821512.1	AC067773.1	156	-12.75	156	-12.75	13902	22	973	656
hsa-miR-194-5p	ENSG00000284116	ENST00000809441.1	AL772307.1	142	-10.62	142	-10.62	13932	22	1140	258
hsa-miR-194-5p	ENSG00000284116	ENST00000809257.1	AL772307.1	140	-13.44	140	-13.44	13942	22	1088	260
hsa-miR-194-5p	ENSG00000284116	ENST00000809451.1	AL772307.1	148	-17.03	148	-17.03	13958	22	1128	599
hsa-miR-194-5p	ENSG00000284116	ENST00000809452.1	AL772307.1	148	-17.03	148	-17.03	13959	22	784	575
hsa-miR-194-5p	ENSG00000284116	ENST00000809453.1	AL772307.1	148	-17.03	148	-17.03	13960	22	560	474
hsa-miR-194-5p	ENSG00000204802	ENST00000717368.1	AL590399.1	144	-15.48	144	-15.48	13970	22	729	439
hsa-miR-194-5p	ENSG00000204802	ENST00000755026.1	AL590399.1	144	-15.48	144	-15.48	13971	22	752	465
hsa-miR-194-5p	ENSG00000204802	ENST00000377518.4	AL590399.1	144	-15.48	144	-15.48	13972	22	2784	2497
hsa-miR-194-5p	ENSG00000204802	ENST00000717369.1	AL590399.1	144	-15.48	144	-15.48	13973	22	343	188
hsa-miR-194-5p	ENSG00000204802	ENST00000717370.1	AL590399.1	144	-15.48	144	-15.48	13974	22	356	201
hsa-miR-194-5p	ENSG00000204802	ENST00000717371.1	AL590399.1	144	-15.48	144	-15.48	13975	22	1071	920
hsa-miR-194-5p	ENSG00000204802	ENST00000717372.1	AL590399.1	144	-15.48	144	-15.48	13976	22	776	627
hsa-miR-194-5p	ENSG00000204802	ENST00000717373.1	AL590399.1	144	-15.48	144	-15.48	13977	22	378	231
hsa-miR-194-5p	ENSG00000269929	ENST00000803415.1	AL158152.1	168	-24.95	168	-24.95	14002	22	900	118
hsa-miR-194-5p	ENSG00000204682	ENST00000830463.1	CASC10	147	-21.52	147	-21.52	14038	22	625	516
hsa-miR-194-5p	ENSG00000254815	ENST00000527620.5	AP006284.1	144	-16.77	144	-16.77	14117	22	2210	1824
hsa-miR-194-5p	ENSG00000254815	ENST00000527113.2	AP006284.1	144	-16.77	144	-16.77	14118	22	530	141
hsa-miR-194-5p	ENSG00000235027	ENST00000449248.1	AC068580.3	154	-29.73	154	-29.73	14124	22	2015	554
hsa-miR-194-5p	ENSG00000254844	ENST00000531850.2	AP000757.2	152	-16.09	152	-16.09	14147	22	557	473
hsa-miR-194-5p	ENSG00000255248	ENST00000660311.1	MIR100HG	146	-18.64	146	-18.64	14174	22	960	35
hsa-miR-194-5p	ENSG00000255248	ENST00000780393.1	MIR100HG	146	-18.64	146	-18.64	14175	22	898	122
hsa-miR-194-5p	ENSG00000255248	ENST00000686059.1	MIR100HG	146	-18.64	146	-18.64	14177	22	1551	172
hsa-miR-194-5p	ENSG00000255248	ENST00000780391.1	MIR100HG	146	-18.64	146	-18.64	14178	22	1497	205
hsa-miR-194-5p	ENSG00000255248	ENST00000780389.1	MIR100HG	146	-18.64	146	-18.64	14179	22	1161	322
hsa-miR-194-5p	ENSG00000255248	ENST00000780390.1	MIR100HG	146	-18.64	146	-18.64	14182	22	1266	281
hsa-miR-194-5p	ENSG00000255248	ENST00000524376.3	MIR100HG	144	-13.39	144	-13.39	14208	22	2745	1213
hsa-miR-194-5p	ENSG00000255248	ENST00000530072.7	MIR100HG	144	-13.39	144	-13.39	14209	22	3673	2141
hsa-miR-194-5p	ENSG00000255248	ENST00000531381.1	MIR100HG	144	-13.39	144	-13.39	14210	22	3370	1838
hsa-miR-194-5p	ENSG00000255248	ENST00000529823.3	MIR100HG	144	-13.39	144	-13.39	14211	22	3368	1836
hsa-miR-194-5p	ENSG00000255248	ENST00000654519.2	MIR100HG	144	-13.39	144	-13.39	14212	22	3393	1861
hsa-miR-194-5p	ENSG00000255248	ENST00000653167.2	MIR100HG	144	-13.39	144	-13.39	14213	22	3116	1584
hsa-miR-194-5p	ENSG00000255248	ENST00000658364.2	MIR100HG	144	-13.39	144	-13.39	14214	22	3163	1631
hsa-miR-194-5p	ENSG00000255248	ENST00000664908.2	MIR100HG	144	-13.39	144	-13.39	14215	22	3109	1577
hsa-miR-194-5p	ENSG00000255248	ENST00000668776.2	MIR100HG	144	-13.39	144	-13.39	14216	22	4383	2851
hsa-miR-194-5p	ENSG00000255248	ENST00000780377.1	MIR100HG	144	-13.39	144	-13.39	14217	22	3092	1560
hsa-miR-194-5p	ENSG00000255248	ENST00000532890.6	MIR100HG	144	-13.39	144	-13.39	14218	22	2973	1455
hsa-miR-194-5p	ENSG00000255248	ENST00000649216.1	MIR100HG	144	-13.39	144	-13.39	14219	22	3226	1712
hsa-miR-194-5p	ENSG00000255248	ENST00000528986.2	MIR100HG	144	-13.39	144	-13.39	14220	22	3514	2002
hsa-miR-194-5p	ENSG00000255248	ENST00000531071.6	MIR100HG	144	-13.39	144	-13.39	14221	22	3399	1887
hsa-miR-194-5p	ENSG00000255248	ENST00000665673.1	MIR100HG	144	-13.39	144	-13.39	14222	22	2811	1302
hsa-miR-194-5p	ENSG00000255248	ENST00000650497.2	MIR100HG	144	-13.39	144	-13.39	14223	22	3740	2249
hsa-miR-194-5p	ENSG00000255248	ENST00000662950.1	MIR100HG	290	-32.03	146	-18.64	14224	22	3043	149
hsa-miR-194-5p	ENSG00000255248	ENST00000648209.1	MIR100HG	144	-13.39	144	-13.39	14225	22	2801	1352
hsa-miR-194-5p	ENSG00000255248	ENST00000648734.1	MIR100HG	290	-32.03	146	-18.64	14226	22	3137	149
hsa-miR-194-5p	ENSG00000255248	ENST00000649293.1	MIR100HG	144	-13.39	144	-13.39	14227	22	2971	1532
hsa-miR-194-5p	ENSG00000255248	ENST00000670396.1	MIR100HG	144	-13.39	144	-13.39	14228	22	3004	1565
hsa-miR-194-5p	ENSG00000255248	ENST00000656793.2	MIR100HG	144	-13.39	144	-13.39	14229	22	2900	1485
hsa-miR-194-5p	ENSG00000255248	ENST00000663296.1	MIR100HG	144	-13.39	144	-13.39	14230	22	2848	1434
hsa-miR-194-5p	ENSG00000255248	ENST00000661848.1	MIR100HG	144	-13.39	144	-13.39	14231	22	3174	1761
hsa-miR-194-5p	ENSG00000255248	ENST00000655138.1	MIR100HG	144	-13.39	144	-13.39	14232	22	2867	1454
hsa-miR-194-5p	ENSG00000255248	ENST00000669472.1	MIR100HG	144	-13.39	144	-13.39	14233	22	2976	1573
hsa-miR-194-5p	ENSG00000255248	ENST00000660603.1	MIR100HG	144	-13.39	144	-13.39	14234	22	2766	1368
hsa-miR-194-5p	ENSG00000255248	ENST00000655814.1	MIR100HG	144	-13.39	144	-13.39	14235	22	2585	1762
hsa-miR-194-5p	ENSG00000255248	ENST00000637700.1	MIR100HG	144	-13.39	144	-13.39	14236	22	2262	1766
hsa-miR-194-5p	ENSG00000255248	ENST00000654629.1	MIR100HG	144	-13.39	144	-13.39	14237	22	2038	1758
hsa-miR-194-5p	ENSG00000255248	ENST00000780398.1	MIR100HG	146	-18.64	146	-18.64	14257	22	604	112
hsa-miR-194-5p	ENSG00000255248	ENST00000780402.1	MIR100HG	146	-18.64	146	-18.64	14271	22	820	20
hsa-miR-194-5p	ENSG00000255248	ENST00000780405.1	MIR100HG	146	-18.64	146	-18.64	14280	22	500	135
hsa-miR-194-5p	ENSG00000255248	ENST00000780406.1	MIR100HG	146	-18.64	146	-18.64	14281	22	2023	321
hsa-miR-194-5p	ENSG00000255248	ENST00000780407.1	MIR100HG	146	-18.64	146	-18.64	14289	22	1082	233
hsa-miR-194-5p	ENSG00000255248	ENST00000654571.2	MIR100HG	146	-18.64	146	-18.64	14292	22	1720	149
hsa-miR-194-5p	ENSG00000255248	ENST00000780423.1	MIR100HG	146	-18.64	146	-18.64	14293	22	1432	171
hsa-miR-194-5p	ENSG00000255248	ENST00000780422.1	MIR100HG	146	-18.64	146	-18.64	14295	22	1190	326
hsa-miR-194-5p	ENSG00000255248	ENST00000780424.1	MIR100HG	146	-18.64	146	-18.64	14297	22	948	229
hsa-miR-194-5p	ENSG00000255248	ENST00000780433.1	MIR100HG	146	-18.64	146	-18.64	14306	22	1047	20
hsa-miR-194-5p	ENSG00000255248	ENST00000780432.1	MIR100HG	146	-18.64	146	-18.64	14307	22	848	65
hsa-miR-194-5p	ENSG00000255248	ENST00000780430.1	MIR100HG	146	-18.64	146	-18.64	14308	22	889	135
hsa-miR-194-5p	ENSG00000255248	ENST00000780429.1	MIR100HG	146	-18.64	146	-18.64	14310	22	1038	138
hsa-miR-194-5p	ENSG00000255248	ENST00000780428.1	MIR100HG	146	-18.64	146	-18.64	14311	22	808	171
hsa-miR-194-5p	ENSG00000255248	ENST00000780425.1	MIR100HG	146	-18.64	146	-18.64	14314	22	911	202
hsa-miR-194-5p	ENSG00000255248	ENST00000686772.2	MIR100HG	146	-18.64	146	-18.64	14315	22	923	281
hsa-miR-194-5p	ENSG00000255248	ENST00000660329.3	MIR100HG	146	-18.64	146	-18.64	14316	22	1077	289
hsa-miR-194-5p	ENSG00000255248	ENST00000780421.1	MIR100HG	146	-18.64	146	-18.64	14318	22	1198	335
hsa-miR-194-5p	ENSG00000255248	ENST00000647967.2	MIR100HG	289	-28.69	145	-17.93	14326	22	3289	2874
hsa-miR-194-5p	ENSG00000255248	ENST00000780436.1	MIR100HG	290	-29.4	146	-18.64	14327	22	2277	329
hsa-miR-194-5p	ENSG00000255248	ENST00000656387.3	MIR100HG	144	-10.76	144	-10.76	14328	22	1784	1043
hsa-miR-194-5p	ENSG00000255248	ENST00000702205.2	MIR100HG	144	-10.76	144	-10.76	14329	22	745	529
hsa-miR-194-5p	ENSG00000255248	ENST00000780506.1	MIR100HG	144	-10.76	144	-10.76	14330	22	559	359
hsa-miR-194-5p	ENSG00000255248	ENST00000780500.1	MIR100HG	144	-10.76	144	-10.76	14331	22	609	411
hsa-miR-194-5p	ENSG00000255248	ENST00000780437.1	MIR100HG	144	-10.76	144	-10.76	14332	22	754	556
hsa-miR-194-5p	ENSG00000255248	ENST00000701811.1	MIR100HG	290	-29.4	146	-18.64	14333	22	893	182
hsa-miR-194-5p	ENSG00000255248	ENST00000780501.1	MIR100HG	144	-10.76	144	-10.76	14334	22	977	780
hsa-miR-194-5p	ENSG00000255248	ENST00000780499.1	MIR100HG	144	-10.76	144	-10.76	14335	22	1002	806
hsa-miR-194-5p	ENSG00000255248	ENST00000780438.1	MIR100HG	146	-18.64	146	-18.64	14337	22	607	129
hsa-miR-194-5p	ENSG00000255248	ENST00000661695.1	MIR100HG	146	-18.64	146	-18.64	14342	22	635	132
hsa-miR-194-5p	ENSG00000255248	ENST00000780510.1	MIR100HG	143	-11.41	143	-11.41	14345	22	446	396
hsa-miR-194-5p	ENSG00000255248	ENST00000780444.1	MIR100HG	146	-18.64	146	-18.64	14353	22	1040	229
hsa-miR-194-5p	ENSG00000255248	ENST00000666347.2	MIR100HG	146	-18.64	146	-18.64	14354	22	1058	322
hsa-miR-194-5p	ENSG00000255248	ENST00000529804.6	MIR100HG	146	-18.64	146	-18.64	14361	22	1217	185
hsa-miR-194-5p	ENSG00000255248	ENST00000659378.2	MIR100HG	146	-18.64	146	-18.64	14362	22	1424	297
hsa-miR-194-5p	ENSG00000255248	ENST00000780443.1	MIR100HG	146	-18.64	146	-18.64	14366	22	1568	263
hsa-miR-194-5p	ENSG00000255248	ENST00000780446.1	MIR100HG	146	-18.64	146	-18.64	14370	22	1399	132
hsa-miR-194-5p	ENSG00000255248	ENST00000780468.1	MIR100HG	146	-18.64	146	-18.64	14373	22	672	123
hsa-miR-194-5p	ENSG00000255248	ENST00000780467.1	MIR100HG	146	-18.64	146	-18.64	14374	22	1355	272
hsa-miR-194-5p	ENSG00000255248	ENST00000780471.1	MIR100HG	146	-18.64	146	-18.64	14376	22	966	122
hsa-miR-194-5p	ENSG00000255248	ENST00000780472.1	MIR100HG	146	-18.64	146	-18.64	14377	22	987	122
hsa-miR-194-5p	ENSG00000255248	ENST00000780470.1	MIR100HG	146	-18.64	146	-18.64	14378	22	1575	321
hsa-miR-194-5p	ENSG00000255248	ENST00000780482.1	MIR100HG	146	-18.64	146	-18.64	14381	22	970	135
hsa-miR-194-5p	ENSG00000255248	ENST00000780483.1	MIR100HG	146	-18.64	146	-18.64	14382	22	806	135
hsa-miR-194-5p	ENSG00000255248	ENST00000780498.1	MIR100HG	288	-35.22	146	-18.64	14386	22	1715	132
hsa-miR-194-5p	ENSG00000255248	ENST00000780502.1	MIR100HG	146	-18.64	146	-18.64	14387	22	479	135
hsa-miR-194-5p	ENSG00000255248	ENST00000690515.2	MIR100HG	295	-36.61	149	-18.64	14388	22	1610	1037
hsa-miR-194-5p	ENSG00000273784	ENST00000740519.1	AL137058.2	153	-12.92	153	-12.92	14541	22	2182	998
hsa-miR-194-5p	ENSG00000224243	ENST00000663025.1	SOX1-OT	147	-14.35	147	-14.35	14552	22	2606	2494
hsa-miR-194-5p	ENSG00000224243	ENST00000732618.1	SOX1-OT	147	-13.05	147	-13.05	14555	22	3019	2399
hsa-miR-194-5p	ENSG00000259211	ENST00000559730.1	AC013356.2	290	-37.69	149	-21.12	14606	22	729	240
hsa-miR-194-5p	ENSG00000261771	ENST00000565113.5	DNAAF4-CCPG1	140	-15	140	-15	14608	22	4589	1087
hsa-miR-194-5p	ENSG00000255571	ENST00000536780.6	MIR9-3HG	140	-18.1	140	-18.1	14610	22	4778	1910
hsa-miR-194-5p	ENSG00000255571	ENST00000654171.1	MIR9-3HG	140	-18.1	140	-18.1	14611	22	4350	1484
hsa-miR-194-5p	ENSG00000255571	ENST00000657897.1	MIR9-3HG	140	-18.1	140	-18.1	14613	22	4308	1443
hsa-miR-194-5p	ENSG00000255571	ENST00000661040.1	MIR9-3HG	140	-18.1	140	-18.1	14614	22	4092	1227
hsa-miR-194-5p	ENSG00000255571	ENST00000654184.1	MIR9-3HG	140	-18.1	140	-18.1	14615	22	4201	1335
hsa-miR-194-5p	ENSG00000255571	ENST00000658194.1	MIR9-3HG	140	-18.1	140	-18.1	14616	22	4266	1401
hsa-miR-194-5p	ENSG00000255571	ENST00000661036.1	MIR9-3HG	140	-18.1	140	-18.1	14617	22	4225	1360
hsa-miR-194-5p	ENSG00000255571	ENST00000659235.1	MIR9-3HG	140	-18.1	140	-18.1	14618	22	4269	1404
hsa-miR-194-5p	ENSG00000255571	ENST00000669499.1	MIR9-3HG	140	-18.1	140	-18.1	14619	22	3818	953
hsa-miR-194-5p	ENSG00000255571	ENST00000654079.1	MIR9-3HG	140	-18.1	140	-18.1	14620	22	4019	1154
hsa-miR-194-5p	ENSG00000255571	ENST00000670779.1	MIR9-3HG	140	-18.1	140	-18.1	14621	22	3960	1092
hsa-miR-194-5p	ENSG00000255571	ENST00000658764.1	MIR9-3HG	140	-18.1	140	-18.1	14622	22	4175	1310
hsa-miR-194-5p	ENSG00000255571	ENST00000662043.1	MIR9-3HG	140	-18.1	140	-18.1	14627	22	1616	1237
hsa-miR-194-5p	ENSG00000255571	ENST00000666816.1	MIR9-3HG	140	-18.1	140	-18.1	14630	22	4053	1188
hsa-miR-194-5p	ENSG00000255571	ENST00000658770.1	MIR9-3HG	140	-18.1	140	-18.1	14631	22	3971	1106
hsa-miR-194-5p	ENSG00000255571	ENST00000667285.1	MIR9-3HG	140	-18.1	140	-18.1	14633	22	1889	1040
hsa-miR-194-5p	ENSG00000255571	ENST00000668524.1	MIR9-3HG	140	-18.1	140	-18.1	14634	22	1971	1122
hsa-miR-194-5p	ENSG00000255571	ENST00000665852.1	MIR9-3HG	140	-18.1	140	-18.1	14639	22	1508	1137
hsa-miR-194-5p	ENSG00000255571	ENST00000558754.6	MIR9-3HG	140	-18.1	140	-18.1	14641	22	2759	1583
hsa-miR-194-5p	ENSG00000255571	ENST00000669098.1	MIR9-3HG	140	-18.1	140	-18.1	14642	22	5427	2562
hsa-miR-194-5p	ENSG00000255571	ENST00000538734.7	MIR9-3HG	140	-18.1	140	-18.1	14644	22	1867	1018
hsa-miR-194-5p	ENSG00000255571	ENST00000669645.1	MIR9-3HG	140	-18.1	140	-18.1	14645	22	1904	1060
hsa-miR-194-5p	ENSG00000255571	ENST00000660601.1	MIR9-3HG	140	-18.1	140	-18.1	14646	22	2033	1184
hsa-miR-194-5p	ENSG00000255571	ENST00000660922.1	MIR9-3HG	140	-18.1	140	-18.1	14647	22	1827	982
hsa-miR-194-5p	ENSG00000255571	ENST00000670238.1	MIR9-3HG	140	-18.1	140	-18.1	14648	22	1994	1147
hsa-miR-194-5p	ENSG00000255571	ENST00000546186.3	MIR9-3HG	140	-18.1	140	-18.1	14649	22	1746	952
hsa-miR-194-5p	ENSG00000255571	ENST00000662136.1	MIR9-3HG	140	-18.1	140	-18.1	14655	22	1838	1000
hsa-miR-194-5p	ENSG00000255571	ENST00000671075.1	MIR9-3HG	140	-18.1	140	-18.1	14661	22	5094	2229
hsa-miR-194-5p	ENSG00000255571	ENST00000663717.1	MIR9-3HG	140	-18.1	140	-18.1	14662	22	5607	2742
hsa-miR-194-5p	ENSG00000255571	ENST00000671447.1	MIR9-3HG	140	-18.1	140	-18.1	14663	22	4989	2124
hsa-miR-194-5p	ENSG00000261526	ENST00000565797.4	AC012615.1	162	-20.8	162	-20.8	14788	22	1692	1216
hsa-miR-194-5p	ENSG00000261526	ENST00000760404.1	AC012615.1	162	-20.8	162	-20.8	14789	22	1230	1109
hsa-miR-194-5p	ENSG00000261526	ENST00000760403.1	AC012615.1	162	-20.8	162	-20.8	14790	22	978	860
hsa-miR-194-5p	ENSG00000261526	ENST00000760406.1	AC012615.1	162	-20.8	162	-20.8	14791	22	1151	1041
hsa-miR-194-5p	ENSG00000261526	ENST00000760407.1	AC012615.1	162	-20.8	162	-20.8	14792	22	1105	995
hsa-miR-194-5p	ENSG00000261526	ENST00000760402.1	AC012615.1	162	-20.8	162	-20.8	14793	22	1109	1000
hsa-miR-194-5p	ENSG00000261526	ENST00000760405.1	AC012615.1	162	-20.8	162	-20.8	14794	22	1005	899
hsa-miR-194-5p	ENSG00000176840	ENST00000658818.1	MIR7-3HG	140	-14.31	140	-14.31	14796	22	981	808
hsa-miR-194-5p	ENSG00000176840	ENST00000655163.1	MIR7-3HG	140	-14.31	140	-14.31	14797	22	846	655
hsa-miR-194-5p	ENSG00000176840	ENST00000655494.3	MIR7-3HG	140	-14.31	140	-14.31	14799	22	669	462
hsa-miR-194-5p	ENSG00000176840	ENST00000668602.2	MIR7-3HG	140	-14.31	140	-14.31	14800	22	874	678
hsa-miR-194-5p	ENSG00000176840	ENST00000667215.3	MIR7-3HG	140	-14.31	140	-14.31	14801	22	689	493
hsa-miR-194-5p	ENSG00000176840	ENST00000317292.10	MIR7-3HG	140	-14.31	140	-14.31	14802	22	778	554
hsa-miR-194-5p	ENSG00000176840	ENST00000684819.2	MIR7-3HG	140	-14.31	140	-14.31	14803	22	619	462
hsa-miR-194-5p	ENSG00000176840	ENST00000767170.1	MIR7-3HG	140	-14.31	140	-14.31	14804	22	883	726
hsa-miR-194-5p	ENSG00000176840	ENST00000667223.2	MIR7-3HG	140	-14.31	140	-14.31	14805	22	849	676
hsa-miR-194-5p	ENSG00000176840	ENST00000702816.2	MIR7-3HG	140	-14.31	140	-14.31	14806	22	752	575
hsa-miR-194-5p	ENSG00000176840	ENST00000669248.3	MIR7-3HG	140	-14.31	140	-14.31	14807	22	800	604
hsa-miR-194-5p	ENSG00000176840	ENST00000767171.1	MIR7-3HG	140	-14.31	140	-14.31	14808	22	944	787
hsa-miR-194-5p	ENSG00000176840	ENST00000702698.2	MIR7-3HG	140	-14.31	140	-14.31	14809	22	593	419
hsa-miR-194-5p	ENSG00000176840	ENST00000767174.1	MIR7-3HG	140	-14.31	140	-14.31	14810	22	924	767
hsa-miR-194-5p	ENSG00000176840	ENST00000767175.1	MIR7-3HG	140	-14.31	140	-14.31	14811	22	994	837
hsa-miR-194-5p	ENSG00000176840	ENST00000767176.1	MIR7-3HG	140	-14.31	140	-14.31	14812	22	654	497
hsa-miR-194-5p	ENSG00000176840	ENST00000592709.7	MIR7-3HG	140	-14.31	140	-14.31	14813	22	754	581
hsa-miR-194-5p	ENSG00000176840	ENST00000662725.1	MIR7-3HG	140	-14.31	140	-14.31	14814	22	924	751
hsa-miR-194-5p	ENSG00000176840	ENST00000588711.7	MIR7-3HG	140	-14.31	140	-14.31	14815	22	604	431
hsa-miR-194-5p	ENSG00000176840	ENST00000669408.2	MIR7-3HG	140	-14.31	140	-14.31	14816	22	742	569
hsa-miR-194-5p	ENSG00000176840	ENST00000702540.2	MIR7-3HG	140	-14.31	140	-14.31	14817	22	656	483
hsa-miR-194-5p	ENSG00000176840	ENST00000767166.1	MIR7-3HG	140	-14.31	140	-14.31	14818	22	915	740
hsa-miR-194-5p	ENSG00000176840	ENST00000767165.1	MIR7-3HG	140	-14.31	140	-14.31	14819	22	810	633
hsa-miR-194-5p	ENSG00000176840	ENST00000657100.2	MIR7-3HG	140	-14.31	140	-14.31	14820	22	795	604
hsa-miR-194-5p	ENSG00000176840	ENST00000656469.2	MIR7-3HG	140	-14.31	140	-14.31	14821	22	866	674
hsa-miR-194-5p	ENSG00000176840	ENST00000655375.2	MIR7-3HG	140	-14.31	140	-14.31	14822	22	935	743
hsa-miR-194-5p	ENSG00000176840	ENST00000691766.2	MIR7-3HG	140	-14.31	140	-14.31	14823	22	659	467
hsa-miR-194-5p	ENSG00000176840	ENST00000660889.2	MIR7-3HG	140	-14.31	140	-14.31	14824	22	724	531
hsa-miR-194-5p	ENSG00000176840	ENST00000586721.8	MIR7-3HG	140	-14.31	140	-14.31	14825	22	912	718
hsa-miR-194-5p	ENSG00000176840	ENST00000767189.1	MIR7-3HG	140	-14.31	140	-14.31	14829	22	936	786
hsa-miR-194-5p	ENSG00000176840	ENST00000658545.1	MIR7-3HG	140	-14.31	140	-14.31	14830	22	748	595
hsa-miR-194-5p	ENSG00000176840	ENST00000669889.1	MIR7-3HG	140	-14.31	140	-14.31	14831	22	913	760
hsa-miR-194-5p	ENSG00000176840	ENST00000767184.1	MIR7-3HG	140	-14.31	140	-14.31	14832	22	1011	858
hsa-miR-194-5p	ENSG00000176840	ENST00000767185.1	MIR7-3HG	140	-14.31	140	-14.31	14833	22	1021	868
hsa-miR-194-5p	ENSG00000176840	ENST00000767186.1	MIR7-3HG	140	-14.31	140	-14.31	14834	22	859	706
hsa-miR-194-5p	ENSG00000176840	ENST00000767187.1	MIR7-3HG	140	-14.31	140	-14.31	14835	22	715	562
hsa-miR-194-5p	ENSG00000176840	ENST00000702630.1	MIR7-3HG	140	-14.31	140	-14.31	14836	22	647	490
hsa-miR-194-5p	ENSG00000176840	ENST00000767177.1	MIR7-3HG	140	-14.31	140	-14.31	14837	22	1062	905
hsa-miR-194-5p	ENSG00000176840	ENST00000767178.1	MIR7-3HG	140	-14.31	140	-14.31	14838	22	881	724
hsa-miR-194-5p	ENSG00000176840	ENST00000767179.1	MIR7-3HG	140	-14.31	140	-14.31	14839	22	619	462
hsa-miR-194-5p	ENSG00000176840	ENST00000767180.1	MIR7-3HG	140	-14.31	140	-14.31	14840	22	891	734
hsa-miR-194-5p	ENSG00000176840	ENST00000767181.1	MIR7-3HG	140	-14.31	140	-14.31	14841	22	1013	856
hsa-miR-194-5p	ENSG00000176840	ENST00000767182.1	MIR7-3HG	140	-14.31	140	-14.31	14842	22	790	633
hsa-miR-194-5p	ENSG00000176840	ENST00000767183.1	MIR7-3HG	140	-14.31	140	-14.31	14843	22	928	771
hsa-miR-194-5p	ENSG00000176840	ENST00000767172.1	MIR7-3HG	140	-14.31	140	-14.31	14844	22	884	725
hsa-miR-194-5p	ENSG00000176840	ENST00000767173.1	MIR7-3HG	140	-14.31	140	-14.31	14845	22	733	574
hsa-miR-194-5p	ENSG00000176840	ENST00000767169.1	MIR7-3HG	140	-14.31	140	-14.31	14846	22	671	510
hsa-miR-194-5p	ENSG00000176840	ENST00000657474.1	MIR7-3HG	140	-14.31	140	-14.31	14847	22	873	701
hsa-miR-194-5p	ENSG00000176840	ENST00000591008.2	MIR7-3HG	140	-14.31	140	-14.31	14848	22	1026	853
hsa-miR-194-5p	ENSG00000176840	ENST00000667444.1	MIR7-3HG	140	-14.31	140	-14.31	14849	22	967	794
hsa-miR-194-5p	ENSG00000176840	ENST00000664951.1	MIR7-3HG	140	-14.31	140	-14.31	14850	22	957	784
hsa-miR-194-5p	ENSG00000176840	ENST00000666978.1	MIR7-3HG	140	-14.31	140	-14.31	14851	22	826	653
hsa-miR-194-5p	ENSG00000176840	ENST00000660973.1	MIR7-3HG	140	-14.31	140	-14.31	14852	22	840	667
hsa-miR-194-5p	ENSG00000176840	ENST00000663804.1	MIR7-3HG	140	-14.31	140	-14.31	14853	22	1482	1309
hsa-miR-194-5p	ENSG00000176840	ENST00000661584.1	MIR7-3HG	140	-14.31	140	-14.31	14854	22	872	699
hsa-miR-194-5p	ENSG00000176840	ENST00000665092.1	MIR7-3HG	140	-14.31	140	-14.31	14855	22	922	749
hsa-miR-194-5p	ENSG00000176840	ENST00000670508.1	MIR7-3HG	140	-14.31	140	-14.31	14856	22	843	670
hsa-miR-194-5p	ENSG00000176840	ENST00000663010.1	MIR7-3HG	140	-14.31	140	-14.31	14857	22	828	655
hsa-miR-194-5p	ENSG00000176840	ENST00000653646.1	MIR7-3HG	140	-14.31	140	-14.31	14858	22	799	626
hsa-miR-194-5p	ENSG00000176840	ENST00000654084.1	MIR7-3HG	140	-14.31	140	-14.31	14859	22	654	481
hsa-miR-194-5p	ENSG00000176840	ENST00000666056.1	MIR7-3HG	140	-14.31	140	-14.31	14860	22	947	774
hsa-miR-194-5p	ENSG00000176840	ENST00000670131.2	MIR7-3HG	140	-14.31	140	-14.31	14861	22	999	826
hsa-miR-194-5p	ENSG00000176840	ENST00000653012.1	MIR7-3HG	140	-14.31	140	-14.31	14862	22	877	704
hsa-miR-194-5p	ENSG00000176840	ENST00000767167.1	MIR7-3HG	140	-14.31	140	-14.31	14863	22	674	501
hsa-miR-194-5p	ENSG00000176840	ENST00000767168.1	MIR7-3HG	140	-14.31	140	-14.31	14864	22	643	470
hsa-miR-194-5p	ENSG00000176840	ENST00000653355.1	MIR7-3HG	140	-14.31	140	-14.31	14865	22	868	679
hsa-miR-194-5p	ENSG00000176840	ENST00000589368.3	MIR7-3HG	140	-14.31	140	-14.31	14866	22	891	702
hsa-miR-194-5p	ENSG00000176840	ENST00000660172.1	MIR7-3HG	140	-14.31	140	-14.31	14867	22	819	627
hsa-miR-194-5p	ENSG00000176840	ENST00000688490.3	MIR7-3HG	140	-14.31	140	-14.31	14868	22	979	787
hsa-miR-194-5p	ENSG00000176840	ENST00000666837.2	MIR7-3HG	140	-14.31	140	-14.31	14869	22	652	458
hsa-miR-194-5p	ENSG00000176840	ENST00000592663.7	MIR7-3HG	140	-14.31	140	-14.31	14870	22	712	518
hsa-miR-194-5p	ENSG00000176840	ENST00000767164.1	MIR7-3HG	140	-14.31	140	-14.31	14871	22	965	769
hsa-miR-194-5p	ENSG00000176840	ENST00000767188.1	MIR7-3HG	140	-14.31	140	-14.31	14875	22	599	446
hsa-miR-194-5p	ENSG00000176840	ENST00000589639.1	MIR7-3HG	140	-14.31	140	-14.31	14876	22	587	537
hsa-miR-194-5p	ENSG00000176840	ENST00000588758.5	MIR7-3HG	140	-14.31	140	-14.31	14877	22	865	712
hsa-miR-194-5p	ENSG00000176840	ENST00000662608.1	MIR7-3HG	140	-14.31	140	-14.31	14878	22	556	452
hsa-miR-194-5p	ENSG00000176840	ENST00000588923.6	MIR7-3HG	140	-14.31	140	-14.31	14879	22	635	462
hsa-miR-194-5p	ENSG00000267519	ENST00000587762.2	AC020916.1	429	-43.91	147	-17.21	14880	22	19049	17567
hsa-miR-194-5p	ENSG00000214049	ENST00000718453.1	UCA1	148	-14.51	148	-14.51	14885	22	7791	3298
hsa-miR-194-5p	ENSG00000268555	ENST00000789589.1	AC123912.4	145	-20.96	145	-20.96	14938	22	848	380
hsa-miR-194-5p	ENSG00000268555	ENST00000789591.1	AC123912.4	145	-20.96	145	-20.96	14939	22	1204	451
hsa-miR-194-5p	ENSG00000237767	ENST00000664271.2	LINC01370	142	-14.67	142	-14.67	15021	22	2512	1374
hsa-miR-194-5p	ENSG00000223749	ENST00000809847.1	MIR503HG	304	-31.4	157	-20.25	15210	22	2939	1635
hsa-miR-194-5p	ENSG00000223749	ENST00000809852.1	MIR503HG	304	-31.4	157	-20.25	15212	22	1466	605
hsa-miR-194-5p	ENSG00000238039	ENST00000370438.2	AC244197.2	142	-16.83	142	-16.83	15214	22	655	509
hsa-miR-192-5p	ENSG00000125462	ENST00000608007.1	C1orf61	292	-31.98	152	-19.36	15457	21	3138	2028
hsa-miR-192-5p	ENSG00000259439	ENST00000432125.3	LINC01833	154	-11.46	154	-11.46	15678	21	2755	2415
hsa-miR-192-5p	ENSG00000259439	ENST00000437916.2	LINC01833	154	-11.46	154	-11.46	15680	21	2880	2145
hsa-miR-192-5p	ENSG00000224509	ENST00000686966.2	AC010884.1	141	-14.91	141	-14.91	15708	21	1490	562
hsa-miR-192-5p	ENSG00000224509	ENST00000456519.3	AC010884.1	141	-14.91	141	-14.91	15709	21	1260	341
hsa-miR-192-5p	ENSG00000224509	ENST00000791104.1	AC010884.1	141	-14.91	141	-14.91	15710	21	1158	243
hsa-miR-192-5p	ENSG00000224509	ENST00000702648.2	AC010884.1	141	-14.91	141	-14.91	15711	21	1001	522
hsa-miR-192-5p	ENSG00000224509	ENST00000791125.1	AC010884.1	141	-14.91	141	-14.91	15712	21	837	361
hsa-miR-192-5p	ENSG00000224509	ENST00000702224.1	AC010884.1	141	-14.91	141	-14.91	15713	21	1530	1054
hsa-miR-192-5p	ENSG00000224509	ENST00000688299.3	AC010884.1	141	-14.91	141	-14.91	15714	21	1001	525
hsa-miR-192-5p	ENSG00000224509	ENST00000791118.1	AC010884.1	141	-14.91	141	-14.91	15715	21	652	176
hsa-miR-192-5p	ENSG00000224509	ENST00000791117.1	AC010884.1	141	-14.91	141	-14.91	15716	21	660	184
[truncated: 18,967 more rows]
