# Supplementary material for: Human iPSC-based modeling reveals coding and non-coding transcriptomic alterations associated with RFX3 deficiency in pancreatic islets
Source: Research Square preprint supplement (doi:10.21203/rs.3.rs-7435927/v1), 2025-09-12
Supplement: Supplementary file 2 [file 83ff11300d390d92c5067534.xlsx]

## Sheet: Sheet1
Supplementary Table 7: miRanda integration analysis between Upregulated DElncRNA and downregulated DEmiRs
miRNA_ID	lncRNA_gene_ID	lncRNA_transcript_ID	lncRNA_gene_NAME	Total_Score	Total_Energy	Max_Score	Max_Energy	Strand	miRNA_Length	lncRNA_Length	Alignment_Position
hsa-miR-6871-5p	ENSG00000284708	ENST00000642131.1	AL031731.1	144	-24.51	144	-24.51	1	22	2094	154
hsa-miR-6871-5p	ENSG00000224259	ENST00000772285.1	LINC01133	140	-13.22	140	-13.22	9	22	822	645
hsa-miR-6871-5p	ENSG00000224259	ENST00000772286.1	LINC01133	140	-13.22	140	-13.22	10	22	1273	1096
hsa-miR-6871-5p	ENSG00000224259	ENST00000772308.1	LINC01133	142	-21.03	142	-21.03	11	22	527	349
hsa-miR-6871-5p	ENSG00000224259	ENST00000772287.1	LINC01133	140	-13.22	140	-13.22	12	22	1325	1221
hsa-miR-6871-5p	ENSG00000224259	ENST00000635112.2	LINC01133	142	-20.84	142	-20.84	13	22	2363	766
hsa-miR-6871-5p	ENSG00000224259	ENST00000657602.1	LINC01133	140	-13.22	140	-13.22	15	22	1418	1212
hsa-miR-6871-5p	ENSG00000224259	ENST00000423943.4	LINC01133	140	-13.22	140	-13.22	16	22	1478	1082
hsa-miR-6871-5p	ENSG00000224259	ENST00000772296.1	LINC01133	140	-13.22	140	-13.22	19	22	723	541
hsa-miR-6871-5p	ENSG00000224259	ENST00000443364.8	LINC01133	140	-13.22	140	-13.22	20	22	1358	1156
hsa-miR-6871-5p	ENSG00000224259	ENST00000772283.1	LINC01133	143	-22.28	143	-22.28	22	22	804	326
hsa-miR-6871-5p	ENSG00000224259	ENST00000701616.2	LINC01133	140	-13.22	140	-13.22	24	22	795	613
hsa-miR-6871-5p	ENSG00000224259	ENST00000772284.1	LINC01133	143	-22.28	143	-22.28	25	22	932	455
hsa-miR-6871-5p	ENSG00000224259	ENST00000772299.1	LINC01133	140	-13.22	140	-13.22	26	22	1207	1103
hsa-miR-6871-5p	ENSG00000224259	ENST00000772297.1	LINC01133	140	-13.22	140	-13.22	27	22	734	557
hsa-miR-6871-5p	ENSG00000282221	ENST00000633182.2	AC119427.1	147	-31.63	147	-31.63	32	22	924	704
hsa-miR-6871-5p	ENSG00000225234	ENST00000453806.1	TRAPPC12-AS1	147	-24.93	147	-24.93	33	22	908	628
hsa-miR-6871-5p	ENSG00000260101	ENST00000561559.3	AC008074.3	149	-24.92	149	-24.92	34	22	2599	426
hsa-miR-6871-5p	ENSG00000260101	ENST00000789328.1	AC008074.3	149	-24.92	149	-24.92	35	22	2163	430
hsa-miR-6871-5p	ENSG00000204792	ENST00000717897.1	LINC01291	449	-72.27	156	-26.24	46	22	5575	2900	2196	2919
hsa-miR-6871-5p	ENSG00000204792	ENST00000435984.2	LINC01291	449	-72.27	156	-26.24	47	22	5588	2913	2209	2932
hsa-miR-6871-5p	ENSG00000204792	ENST00000453951.1	LINC01291	302	-46.03	156	-24.78	49	22	1266	264	283
hsa-miR-6871-5p	ENSG00000228791	ENST00000620754.5	THRB-AS1	296	-65.73	153	-33.5	74	22	1147	410	235
hsa-miR-6871-5p	ENSG00000228791	ENST00000432368.2	THRB-AS1	296	-65.73	153	-33.5	75	22	1216	308	133
hsa-miR-6871-5p	ENSG00000228791	ENST00000438096.1	THRB-AS1	153	-32.23	153	-32.23	76	22	702	87
hsa-miR-6871-5p	ENSG00000228791	ENST00000629562.3	THRB-AS1	153	-32.23	153	-32.23	77	22	2257	46
hsa-miR-6871-5p	ENSG00000228791	ENST00000594183.1	THRB-AS1	140	-16.45	140	-16.45	87	22	837	71
hsa-miR-6871-5p	ENSG00000273033	ENST00000610128.2	LINC02035	140	-23.23	140	-23.23	94	22	5476	420
hsa-miR-6871-5p	ENSG00000244300	ENST00000740173.1	GATA2-AS1	148	-19.36	148	-19.36	101	22	965	175
hsa-miR-6871-5p	ENSG00000243550	ENST00000716189.1	LINC01214	141	-26.27	141	-26.27	141	22	1077	134
hsa-miR-6871-5p	ENSG00000243550	ENST00000749916.1	LINC01214	141	-26.27	141	-26.27	147	22	1132	125
hsa-miR-6871-5p	ENSG00000243550	ENST00000716190.1	LINC01214	141	-26.27	141	-26.27	149	22	1090	443
hsa-miR-6871-5p	ENSG00000260918	ENST00000562284.1	AC107398.3	293	-40.91	147	-22.82	152	22	7000	989	2262
hsa-miR-6871-5p	ENSG00000251442	ENST00000668669.1	LINC01094	146	-16.85	146	-16.85	154	22	2476	1666
hsa-miR-6871-5p	ENSG00000251442	ENST00000671622.2	LINC01094	146	-16.85	146	-16.85	156	22	2989	1688
hsa-miR-6871-5p	ENSG00000251442	ENST00000503259.6	LINC01094	154	-21.66	154	-21.66	158	22	2560	1896
hsa-miR-6871-5p	ENSG00000251442	ENST00000656991.2	LINC01094	146	-16.85	146	-16.85	159	22	2393	1596
hsa-miR-6871-5p	ENSG00000251442	ENST00000503539.8	LINC01094	146	-16.85	146	-16.85	160	22	2509	1705
hsa-miR-6871-5p	ENSG00000251442	ENST00000507802.6	LINC01094	146	-16.85	146	-16.85	161	22	2485	1644
hsa-miR-6871-5p	ENSG00000251442	ENST00000687467.2	LINC01094	146	-16.85	146	-16.85	163	22	2119	1444
hsa-miR-6871-5p	ENSG00000251442	ENST00000504675.7	LINC01094	146	-16.85	146	-16.85	165	22	2336	1672
hsa-miR-6871-5p	ENSG00000251442	ENST00000701241.1	LINC01094	146	-16.85	146	-16.85	166	22	1831	1658
hsa-miR-6871-5p	ENSG00000251442	ENST00000514130.6	LINC01094	154	-21.66	154	-21.66	171	22	2095	1760
hsa-miR-6871-5p	ENSG00000251442	ENST00000512322.2	LINC01094	146	-16.85	146	-16.85	173	22	2225	1426
hsa-miR-6871-5p	ENSG00000251442	ENST00000652918.1	LINC01094	146	-16.85	146	-16.85	176	22	2207	1366
hsa-miR-6871-5p	ENSG00000251442	ENST00000778523.1	LINC01094	143	-20.19	143	-20.19	177	22	2647	926
hsa-miR-6871-5p	ENSG00000251442	ENST00000667455.1	LINC01094	146	-16.85	146	-16.85	178	22	2266	1477
hsa-miR-6871-5p	ENSG00000251442	ENST00000778505.1	LINC01094	144	-24.51	144	-24.51	181	22	1070	372
hsa-miR-6871-5p	ENSG00000251442	ENST00000666953.1	LINC01094	154	-21.66	154	-21.66	182	22	1846	1470
hsa-miR-6871-5p	ENSG00000251442	ENST00000778515.1	LINC01094	144	-24.51	144	-24.51	189	22	968	270
hsa-miR-6871-5p	ENSG00000251442	ENST00000778514.1	LINC01094	286	-49.04	144	-24.53	190	22	1151	445	126
hsa-miR-6871-5p	ENSG00000251442	ENST00000778516.1	LINC01094	144	-24.51	144	-24.51	191	22	1033	335
hsa-miR-6871-5p	ENSG00000251442	ENST00000778518.1	LINC01094	144	-24.51	144	-24.51	194	22	611	449
hsa-miR-6871-5p	ENSG00000251442	ENST00000778517.1	LINC01094	144	-24.51	144	-24.51	195	22	1030	332
hsa-miR-6871-5p	ENSG00000272320	ENST00000607565.1	AL445309.1	308	-45.89	159	-25.92	212	22	1989	1639	1497
hsa-miR-6871-5p	ENSG00000261211	ENST00000563225.2	AL031123.2	454	-74.61	156	-31.37	214	22	6640	5624	4090	4351
hsa-miR-6871-5p	ENSG00000261211	ENST00000691726.1	AL031123.2	156	-24.72	156	-24.72	216	22	1223	225
hsa-miR-6871-5p	ENSG00000230943	ENST00000788889.1	LINC02541	284	-51.56	143	-26.21	248	22	1451	979	1144
hsa-miR-6871-5p	ENSG00000230943	ENST00000788910.1	LINC02541	284	-51.56	143	-26.21	249	22	1600	1129	1294
hsa-miR-6871-5p	ENSG00000230943	ENST00000788883.1	LINC02541	284	-51.56	143	-26.21	250	22	1417	946	1111
hsa-miR-6871-5p	ENSG00000230943	ENST00000788912.1	LINC02541	284	-51.56	143	-26.21	251	22	1646	1176	1341
hsa-miR-6871-5p	ENSG00000230943	ENST00000788911.1	LINC02541	284	-51.56	143	-26.21	252	22	1480	1010	1175
hsa-miR-6871-5p	ENSG00000230943	ENST00000788915.1	LINC02541	284	-51.56	143	-26.21	253	22	1497	1028	1193
hsa-miR-6871-5p	ENSG00000230943	ENST00000788913.1	LINC02541	284	-51.56	143	-26.21	254	22	1590	1121	1286
hsa-miR-6871-5p	ENSG00000230943	ENST00000654213.2	LINC02541	284	-51.56	143	-26.21	255	22	1707	1238	1403
hsa-miR-6871-5p	ENSG00000230943	ENST00000788903.1	LINC02541	284	-51.56	143	-26.21	256	22	1474	1005	1170
hsa-miR-6871-5p	ENSG00000230943	ENST00000788902.1	LINC02541	284	-51.56	143	-26.21	257	22	1610	1141	1306
hsa-miR-6871-5p	ENSG00000230943	ENST00000788900.1	LINC02541	284	-51.56	143	-26.21	258	22	1483	1014	1179
hsa-miR-6871-5p	ENSG00000230943	ENST00000788899.1	LINC02541	284	-51.56	143	-26.21	259	22	1627	1158	1323
hsa-miR-6871-5p	ENSG00000230943	ENST00000788898.1	LINC02541	284	-51.56	143	-26.21	260	22	1665	1196	1361
hsa-miR-6871-5p	ENSG00000230943	ENST00000788886.1	LINC02541	284	-51.56	143	-26.21	261	22	1208	739	904
hsa-miR-6871-5p	ENSG00000230943	ENST00000788885.1	LINC02541	284	-51.56	143	-26.21	262	22	1504	1035	1200
hsa-miR-6871-5p	ENSG00000230943	ENST00000788901.1	LINC02541	284	-51.56	143	-26.21	263	22	1534	1068	1233
hsa-miR-6871-5p	ENSG00000230943	ENST00000788887.1	LINC02541	284	-51.56	143	-26.21	264	22	1438	972	1137
hsa-miR-6871-5p	ENSG00000230943	ENST00000788884.1	LINC02541	284	-51.56	143	-26.21	265	22	1429	963	1128
hsa-miR-6871-5p	ENSG00000230943	ENST00000649523.1	LINC02541	424	-71.44	143	-26.21	266	22	1879	1437	1602	242
hsa-miR-6871-5p	ENSG00000230943	ENST00000788888.1	LINC02541	284	-51.56	143	-26.21	267	22	1264	992	1157
hsa-miR-6871-5p	ENSG00000230943	ENST00000788897.1	LINC02541	284	-51.56	143	-26.21	268	22	1286	1017	1182
hsa-miR-6871-5p	ENSG00000230943	ENST00000701104.2	LINC02541	140	-19.88	140	-19.88	274	22	780	280
hsa-miR-6871-5p	ENSG00000230943	ENST00000788893.1	LINC02541	140	-19.88	140	-19.88	283	22	774	279
hsa-miR-6871-5p	ENSG00000230943	ENST00000788892.1	LINC02541	140	-19.88	140	-19.88	284	22	882	387
hsa-miR-6871-5p	ENSG00000230943	ENST00000788907.1	LINC02541	140	-19.88	140	-19.88	286	22	989	149
hsa-miR-6871-5p	ENSG00000227719	ENST00000449931.1	AC006042.1	140	-17.34	140	-17.34	289	22	524	378
hsa-miR-6871-5p	ENSG00000236039	ENST00000636929.1	AC019117.1	430	-61.47	146	-23.97	291	22	1462	760	550	1369
hsa-miR-6871-5p	ENSG00000236039	ENST00000658415.1	AC019117.1	435	-54.18	147	-23.97	293	22	1998	1634	703	493
hsa-miR-6871-5p	ENSG00000236039	ENST00000664658.1	AC019117.1	435	-54.18	147	-23.97	294	22	1786	1479	667	457
hsa-miR-6871-5p	ENSG00000236039	ENST00000454003.2	AC019117.1	435	-54.18	147	-23.97	295	22	1721	1414	477	267
hsa-miR-6871-5p	ENSG00000236039	ENST00000658953.1	AC019117.1	435	-54.18	147	-23.97	296	22	1852	1545	733	523
hsa-miR-6871-5p	ENSG00000236039	ENST00000659688.1	AC019117.1	435	-54.18	147	-23.97	297	22	1971	1664	733	523
hsa-miR-6871-5p	ENSG00000236039	ENST00000657616.1	AC019117.1	435	-54.18	147	-23.97	298	22	1937	1630	693	483
hsa-miR-6871-5p	ENSG00000236039	ENST00000655831.1	AC019117.1	435	-54.18	147	-23.97	299	22	1816	1509	693	483
hsa-miR-6871-5p	ENSG00000236039	ENST00000659904.1	AC019117.1	293	-30.21	147	-15.48	300	22	1875	1568	637
hsa-miR-6871-5p	ENSG00000236039	ENST00000668924.1	AC019117.1	435	-54.18	147	-23.97	301	22	1943	1637	686	476
hsa-miR-6871-5p	ENSG00000236039	ENST00000656566.1	AC019117.1	146	-14.73	146	-14.73	302	22	1357	676
hsa-miR-6871-5p	ENSG00000236039	ENST00000662264.1	AC019117.1	146	-14.73	146	-14.73	303	22	1324	662
hsa-miR-6871-5p	ENSG00000236039	ENST00000665552.1	AC019117.1	288	-38.7	146	-23.97	304	22	1314	784	574
hsa-miR-6871-5p	ENSG00000236039	ENST00000663308.1	AC019117.1	288	-38.7	146	-23.97	305	22	1397	686	476
hsa-miR-6871-5p	ENSG00000236039	ENST00000652982.1	AC019117.1	288	-38.7	146	-23.97	306	22	1421	724	514
hsa-miR-6871-5p	ENSG00000236039	ENST00000654345.1	AC019117.1	288	-38.7	146	-23.97	307	22	1098	468	258
hsa-miR-6871-5p	ENSG00000236039	ENST00000670938.1	AC019117.1	288	-38.7	146	-23.97	308	22	1382	752	542
hsa-miR-6871-5p	ENSG00000236039	ENST00000451792.1	AC019117.1	142	-23.97	142	-23.97	310	22	442	373
hsa-miR-6871-5p	ENSG00000122548	ENST00000242109.6	KIAA0087	152	-31.05	152	-31.05	316	22	4354	3091
hsa-miR-6871-5p	ENSG00000233760	ENST00000780912.1	AC004947.1	161	-36.04	161	-36.04	318	22	1773	1573
hsa-miR-6871-5p	ENSG00000229591	ENST00000847087.1	AC006017.1	153	-25.32	153	-25.32	331	22	853	339
hsa-miR-6871-5p	ENSG00000272502	ENST00000605955.1	AC104958.2	297	-53.73	150	-28.35	349	22	1141	721	912
hsa-miR-6871-5p	ENSG00000261655	ENST00000562459.1	AC100803.2	143	-25.38	143	-25.38	351	22	1963	778
hsa-miR-6871-5p	ENSG00000227121	ENST00000765539.1	AC073174.1	151	-23.9	151	-23.9	363	22	1078	996
hsa-miR-6871-5p	ENSG00000227121	ENST00000765540.1	AC073174.1	151	-23.9	151	-23.9	364	22	1091	1011
hsa-miR-6871-5p	ENSG00000237523	ENST00000819793.1	LINC00857	146	-27.39	146	-27.39	370	22	1167	1074
hsa-miR-6871-5p	ENSG00000237523	ENST00000819794.1	LINC00857	146	-27.39	146	-27.39	374	22	1166	1073
hsa-miR-6871-5p	ENSG00000237523	ENST00000819792.1	LINC00857	146	-18.88	146	-18.88	377	22	1531	1201
hsa-miR-6871-5p	ENSG00000269609	ENST00000755285.1	RPARP-AS1	140	-15.33	140	-15.33	381	22	1240	106
hsa-miR-6871-5p	ENSG00000269609	ENST00000755283.1	RPARP-AS1	140	-15.33	140	-15.33	383	22	1244	106
hsa-miR-6871-5p	ENSG00000269609	ENST00000473970.4	RPARP-AS1	150	-31.23	150	-31.23	385	22	1313	88
hsa-miR-6871-5p	ENSG00000269609	ENST00000494270.7	RPARP-AS1	438	-80.85	150	-31.23	386	22	2068	87	598	946
hsa-miR-6871-5p	ENSG00000269609	ENST00000663480.3	RPARP-AS1	150	-31.23	150	-31.23	387	22	1549	70
hsa-miR-6871-5p	ENSG00000269609	ENST00000755287.1	RPARP-AS1	150	-31.23	150	-31.23	388	22	1549	67
hsa-miR-6871-5p	ENSG00000269609	ENST00000657934.2	RPARP-AS1	150	-31.23	150	-31.23	389	22	1455	67
hsa-miR-6871-5p	ENSG00000269609	ENST00000755288.1	RPARP-AS1	150	-31.23	150	-31.23	390	22	1442	65
hsa-miR-6871-5p	ENSG00000269609	ENST00000755286.1	RPARP-AS1	150	-31.23	150	-31.23	391	22	1411	65
hsa-miR-6871-5p	ENSG00000269609	ENST00000755289.1	RPARP-AS1	150	-31.23	150	-31.23	392	22	1198	59
hsa-miR-6871-5p	ENSG00000269609	ENST00000492465.2	RPARP-AS1	150	-31.23	150	-31.23	393	22	1556	51
hsa-miR-6871-5p	ENSG00000269609	ENST00000659211.1	RPARP-AS1	288	-49.62	145	-25.55	399	22	2313	843	1191
hsa-miR-6871-5p	ENSG00000269609	ENST00000597488.1	RPARP-AS1	585	-101.77	150	-29.38	401	22	1938	1005	974	45	393
hsa-miR-6871-5p	ENSG00000269609	ENST00000598368.2	RPARP-AS1	156	-31.99	156	-31.99	402	22	2458	273
hsa-miR-6871-5p	ENSG00000255367	ENST00000717869.1	AC127526.2	155	-26.81	155	-26.81	461	22	1836	1688
hsa-miR-6871-5p	ENSG00000255367	ENST00000527970.1	AC127526.2	142	-28.61	142	-28.61	474	22	983	593
hsa-miR-6871-5p	ENSG00000255367	ENST00000717881.1	AC127526.2	146	-23.38	146	-23.38	476	22	2910	901
hsa-miR-6871-5p	ENSG00000255367	ENST00000717891.1	AC127526.2	150	-27.86	150	-27.86	490	22	699	547
hsa-miR-6871-5p	ENSG00000255478	ENST00000533886.1	AP000944.1	292	-47.16	146	-23.78	500	22	564	172	424
hsa-miR-6871-5p	ENSG00000257660	ENST00000803322.1	AC117498.2	142	-26.37	142	-26.37	540	22	541	387
hsa-miR-6871-5p	ENSG00000257660	ENST00000803320.1	AC117498.2	148	-23.3	148	-23.3	541	22	734	380
hsa-miR-6871-5p	ENSG00000257660	ENST00000803321.1	AC117498.2	148	-23.3	148	-23.3	542	22	766	414
hsa-miR-6871-5p	ENSG00000255970	ENST00000835137.1	LINC02421	153	-26.2	153	-26.2	543	22	841	278
hsa-miR-6871-5p	ENSG00000255970	ENST00000542219.1	LINC02421	311	-56.41	158	-30.21	544	22	3135	708	1470
hsa-miR-6871-5p	ENSG00000255970	ENST00000829389.1	LINC02421	158	-30.21	158	-30.21	545	22	521	419
hsa-miR-6871-5p	ENSG00000241388	ENST00000647473.1	HNF1A-AS1	293	-55.14	150	-29.8	549	22	1144	803	636
hsa-miR-6871-5p	ENSG00000241388	ENST00000539163.1	HNF1A-AS1	140	-26.54	140	-26.54	558	22	2455	1687
hsa-miR-6871-5p	ENSG00000276476	ENST00000721766.1	LINC00540	430	-65.84	146	-23.66	561	22	2227	482	633	973
hsa-miR-6871-5p	ENSG00000276476	ENST00000721755.1	LINC00540	299	-46.08	153	-25.66	562	22	2390	1148	322
hsa-miR-6871-5p	ENSG00000276476	ENST00000721764.1	LINC00540	146	-20.42	146	-20.42	563	22	1452	321
hsa-miR-6871-5p	ENSG00000276476	ENST00000721759.1	LINC00540	146	-20.42	146	-20.42	564	22	1488	321
hsa-miR-6871-5p	ENSG00000276476	ENST00000657205.1	LINC00540	146	-20.42	146	-20.42	565	22	1145	321
hsa-miR-6871-5p	ENSG00000276476	ENST00000721756.1	LINC00540	146	-20.42	146	-20.42	566	22	1357	321
hsa-miR-6871-5p	ENSG00000276476	ENST00000721757.1	LINC00540	146	-20.42	146	-20.42	567	22	1255	321
hsa-miR-6871-5p	ENSG00000276476	ENST00000721758.1	LINC00540	146	-20.42	146	-20.42	568	22	1424	319
hsa-miR-6871-5p	ENSG00000276476	ENST00000721767.1	LINC00540	288	-44.08	146	-23.66	569	22	1613	318	469
hsa-miR-6871-5p	ENSG00000276476	ENST00000721762.1	LINC00540	146	-20.42	146	-20.42	570	22	1020	318
hsa-miR-6871-5p	ENSG00000276476	ENST00000721763.1	LINC00540	288	-44.08	146	-23.66	571	22	1409	318	469
hsa-miR-6871-5p	ENSG00000276476	ENST00000721760.1	LINC00540	146	-20.42	146	-20.42	572	22	1501	318
hsa-miR-6871-5p	ENSG00000276476	ENST00000690279.2	LINC00540	299	-46.08	153	-25.66	573	22	2546	1304	318
hsa-miR-6871-5p	ENSG00000276476	ENST00000631321.1	LINC00540	299	-46.08	153	-25.66	574	22	2412	1076	318
hsa-miR-6871-5p	ENSG00000276476	ENST00000721761.1	LINC00540	288	-44.08	146	-23.66	575	22	1796	263	414
hsa-miR-6871-5p	ENSG00000276476	ENST00000659301.2	LINC00540	153	-25.66	153	-25.66	577	22	2228	892
hsa-miR-6871-5p	ENSG00000276476	ENST00000655363.2	LINC00540	153	-25.66	153	-25.66	579	22	2215	877
hsa-miR-6871-5p	ENSG00000276476	ENST00000616974.1	LINC00540	153	-25.66	153	-25.66	580	22	2143	810
hsa-miR-6871-5p	ENSG00000276476	ENST00000658741.1	LINC00540	153	-25.66	153	-25.66	581	22	2206	868
hsa-miR-6871-5p	ENSG00000251533	ENST00000805819.1	LINC00605	154	-30.27	154	-30.27	619	22	1387	388
hsa-miR-6871-5p	ENSG00000251533	ENST00000805824.1	LINC00605	154	-30.27	154	-30.27	620	22	788	321
hsa-miR-6871-5p	ENSG00000251533	ENST00000805820.1	LINC00605	154	-30.27	154	-30.27	621	22	1017	388
hsa-miR-6871-5p	ENSG00000251533	ENST00000514902.3	LINC00605	295	-51.91	154	-30.27	622	22	1559	565	305
hsa-miR-6871-5p	ENSG00000251533	ENST00000805829.1	LINC00605	295	-51.91	154	-30.27	623	22	1722	728	324
hsa-miR-6871-5p	ENSG00000251533	ENST00000805828.1	LINC00605	154	-30.27	154	-30.27	624	22	695	230
hsa-miR-6871-5p	ENSG00000251533	ENST00000805827.1	LINC00605	154	-30.27	154	-30.27	625	22	1124	130
hsa-miR-6871-5p	ENSG00000251533	ENST00000805825.1	LINC00605	295	-51.91	154	-30.27	626	22	1582	588	328
hsa-miR-6871-5p	ENSG00000251533	ENST00000805823.1	LINC00605	154	-30.27	154	-30.27	627	22	1392	398
hsa-miR-6871-5p	ENSG00000251533	ENST00000805821.1	LINC00605	154	-30.27	154	-30.27	628	22	1054	426
hsa-miR-6871-5p	ENSG00000251533	ENST00000805822.1	LINC00605	154	-30.27	154	-30.27	629	22	891	426
hsa-miR-6871-5p	ENSG00000251533	ENST00000805818.1	LINC00605	295	-51.91	154	-30.27	630	22	1085	457	197
hsa-miR-6871-5p	ENSG00000251533	ENST00000805817.1	LINC00605	154	-30.27	154	-30.27	631	22	1344	350
hsa-miR-6871-5p	ENSG00000251533	ENST00000805816.1	LINC00605	154	-30.27	154	-30.27	632	22	1738	1110
hsa-miR-6871-5p	ENSG00000251533	ENST00000805826.1	LINC00605	154	-30.27	154	-30.27	633	22	1267	276
hsa-miR-6871-5p	ENSG00000236377	ENST00000435733.2	AC084809.2	304	-55.35	158	-31.97	655	22	3024	2740	2370
hsa-miR-6871-5p	ENSG00000266968	ENST00000590535.2	AC023421.1	150	-17.76	150	-17.76	660	22	1785	923
hsa-miR-6871-5p	ENSG00000276980	ENST00000614781.1	AC008760.2	280	-40.79	140	-26.52	663	22	1357	557	982
hsa-miR-6871-5p	ENSG00000267296	ENST00000718467.1	CEBPA-AS1	142	-26.95	142	-26.95	664	22	722	629
hsa-miR-6871-5p	ENSG00000267296	ENST00000718468.1	CEBPA-AS1	142	-26.95	142	-26.95	665	22	796	698
hsa-miR-6871-5p	ENSG00000267296	ENST00000718469.1	CEBPA-AS1	142	-26.95	142	-26.95	666	22	1378	1283
hsa-miR-6871-5p	ENSG00000267296	ENST00000718470.1	CEBPA-AS1	142	-26.95	142	-26.95	667	22	1172	878
hsa-miR-6871-5p	ENSG00000267296	ENST00000718471.1	CEBPA-AS1	142	-26.95	142	-26.95	668	22	967	873
hsa-miR-6871-5p	ENSG00000267296	ENST00000592982.3	CEBPA-AS1	142	-26.95	142	-26.95	669	22	2201	2104
hsa-miR-6871-5p	ENSG00000267296	ENST00000718472.1	CEBPA-AS1	142	-26.95	142	-26.95	670	22	946	849
hsa-miR-6871-5p	ENSG00000235621	ENST00000666125.1	LINC00494	145	-18.95	145	-18.95	672	22	1329	653
hsa-miR-6871-5p	ENSG00000235621	ENST00000663665.1	LINC00494	145	-18.95	145	-18.95	675	22	1535	923
hsa-miR-6871-5p	ENSG00000235621	ENST00000670744.1	LINC00494	145	-18.95	145	-18.95	676	22	1385	773
hsa-miR-6871-5p	ENSG00000235621	ENST00000670842.1	LINC00494	145	-18.95	145	-18.95	677	22	1839	1227
hsa-miR-6871-5p	ENSG00000235621	ENST00000667132.1	LINC00494	145	-18.95	145	-18.95	678	22	1231	615
hsa-miR-6871-5p	ENSG00000235621	ENST00000775434.1	LINC00494	145	-18.95	145	-18.95	679	22	627	268
hsa-miR-6871-5p	ENSG00000235621	ENST00000671184.1	LINC00494	145	-18.95	145	-18.95	680	22	1118	506
hsa-miR-6871-5p	ENSG00000235621	ENST00000660785.1	LINC00494	145	-18.95	145	-18.95	681	22	2630	612
hsa-miR-6871-5p	ENSG00000235621	ENST00000692154.1	LINC00494	145	-18.95	145	-18.95	683	22	2310	280
hsa-miR-6871-5p	ENSG00000235621	ENST00000416742.5	LINC00494	145	-18.95	145	-18.95	684	22	3544	587
hsa-miR-6871-5p	ENSG00000235621	ENST00000652930.1	LINC00494	145	-18.95	145	-18.95	685	22	595	400
hsa-miR-6871-5p	ENSG00000235621	ENST00000655482.1	LINC00494	145	-18.95	145	-18.95	686	22	3418	352
hsa-miR-6871-5p	ENSG00000235621	ENST00000545181.5	LINC00494	145	-18.95	145	-18.95	687	22	3343	386
hsa-miR-6871-5p	ENSG00000235621	ENST00000433094.1	LINC00494	145	-18.95	145	-18.95	688	22	3071	438
hsa-miR-6871-5p	ENSG00000277067	ENST00000782242.1	CU634019.1	164	-25.27	164	-25.27	690	22	1227	649
hsa-miR-6871-5p	ENSG00000277067	ENST00000782243.1	CU634019.1	164	-25.27	164	-25.27	695	22	1031	454
hsa-miR-6871-5p	ENSG00000277067	ENST00000782244.1	CU634019.1	164	-25.27	164	-25.27	700	22	1127	555
hsa-miR-6871-5p	ENSG00000277067	ENST00000782238.1	CU634019.1	140	-14.99	140	-14.99	701	22	2245	944
hsa-miR-6871-5p	ENSG00000277067	ENST00000782245.1	CU634019.1	164	-25.27	164	-25.27	707	22	829	257
hsa-miR-6871-5p	ENSG00000277067	ENST00000782246.1	CU634019.1	164	-25.27	164	-25.27	711	22	874	302
hsa-miR-6871-5p	ENSG00000277067	ENST00000782247.1	CU634019.1	164	-25.27	164	-25.27	725	22	981	409
hsa-miR-6871-5p	ENSG00000277067	ENST00000782241.1	CU634019.1	164	-25.27	164	-25.27	730	22	1316	386
hsa-miR-6871-5p	ENSG00000232079	ENST00000426534.2	LINC01697	142	-29.92	142	-29.92	735	22	1764	594
hsa-miR-6871-5p	ENSG00000232079	ENST00000423808.3	LINC01697	144	-24.41	144	-24.41	740	22	951	202
hsa-miR-6871-5p	ENSG00000232079	ENST00000609782.1	LINC01697	142	-29.92	142	-29.92	743	22	763	651
hsa-miR-6871-5p	ENSG00000225431	ENST00000419628.2	LINC01671	156	-25.95	156	-25.95	744	22	1811	799
hsa-miR-6871-5p	ENSG00000249923	ENST00000824279.1	AC007663.2	287	-43.59	146	-22.29	747	22	2023	1230	1718
hsa-miR-6871-5p	ENSG00000249923	ENST00000824281.1	AC007663.2	148	-33.73	148	-33.73	751	22	458	223
hsa-miR-6871-5p	ENSG00000249923	ENST00000824280.1	AC007663.2	148	-33.73	148	-33.73	752	22	505	270
hsa-miR-6871-5p	ENSG00000249923	ENST00000824278.1	AC007663.2	148	-33.73	148	-33.73	753	22	377	145
hsa-miR-6871-5p	ENSG00000249923	ENST00000824275.1	AC007663.2	148	-33.73	148	-33.73	754	22	452	220
hsa-miR-6871-5p	ENSG00000249923	ENST00000824277.1	AC007663.2	148	-33.73	148	-33.73	755	22	2255	2025
hsa-miR-6871-5p	ENSG00000249923	ENST00000824276.1	AC007663.2	148	-33.73	148	-33.73	756	22	1627	1399
hsa-miR-6871-5p	ENSG00000227188	ENST00000432239.1	MGAT3-AS1	140	-15.88	140	-15.88	757	22	498	405
hsa-miR-6871-5p	ENSG00000226328	ENST00000426282.7	NUP50-AS1	146	-23.38	146	-23.38	758	22	2095	1633
hsa-miR-6871-5p	ENSG00000226328	ENST00000665704.1	NUP50-AS1	154	-31.84	154	-31.84	759	22	2031	424
hsa-miR-6871-5p	ENSG00000236393	ENST00000738318.1	AC091806.1	143	-30.8	143	-30.8	779	22	1912	162
hsa-miR-6871-5p	ENSG00000236393	ENST00000452690.1	AC091806.1	146	-25.53	146	-25.53	780	22	3000	2576
hsa-miR-6871-5p	ENSG00000236393	ENST00000738323.1	AC091806.1	303	-42.42	157	-22.91	784	22	655	268	554
hsa-miR-6871-5p	ENSG00000236393	ENST00000738321.1	AC091806.1	157	-19.51	157	-19.51	785	22	1086	98
hsa-miR-6871-5p	ENSG00000236393	ENST00000738324.1	AC091806.1	303	-42.42	157	-22.91	786	22	399	88	298
hsa-miR-6871-5p	ENSG00000236393	ENST00000738322.1	AC091806.1	157	-19.51	157	-19.51	788	22	988	76
hsa-miR-6871-5p	ENSG00000284377	ENST00000741835.1	AL589669.1	289	-47.99	148	-26.27	789	22	1404	643	771
hsa-miR-6871-5p	ENSG00000284377	ENST00000639829.1	AL589669.1	289	-47.99	148	-26.27	790	22	1506	746	874
hsa-miR-6871-5p	ENSG00000231535	ENST00000685199.2	LINC00278	144	-23.43	144	-23.43	798	22	1912	1352
hsa-miR-6871-5p	ENSG00000231535	ENST00000653660.1	LINC00278	141	-17.81	141	-17.81	811	22	1015	703
hsa-miR-6871-5p	ENSG00000231535	ENST00000803195.1	LINC00278	141	-17.81	141	-17.81	812	22	1633	515
hsa-let-7e-5p	ENSG00000284708	ENST00000642131.1	AL031731.1	145	-25.34	145	-25.34	813	22	2094	6
hsa-let-7e-5p	ENSG00000224259	ENST00000772304.1	LINC01133	140	-9.54	140	-9.54	819	22	1354	1
hsa-let-7e-5p	ENSG00000224259	ENST00000635112.2	LINC01133	146	-17.4	146	-17.4	825	22	2363	754
hsa-let-7e-5p	ENSG00000204792	ENST00000717897.1	LINC01291	313	-44.17	170	-25.46	858	22	5575	2959	3427
hsa-let-7e-5p	ENSG00000204792	ENST00000435984.2	LINC01291	313	-44.17	170	-25.46	859	22	5588	2972	3440
hsa-let-7e-5p	ENSG00000204792	ENST00000453951.1	LINC01291	170	-25.46	170	-25.46	861	22	1266	323
hsa-let-7e-5p	ENSG00000253559	ENST00000520651.2	OSGEPL1-AS1	145	-25.34	145	-25.34	882	22	514	363
hsa-let-7e-5p	ENSG00000253559	ENST00000521819.2	OSGEPL1-AS1	145	-25.34	145	-25.34	883	22	874	246
hsa-let-7e-5p	ENSG00000253559	ENST00000523895.1	OSGEPL1-AS1	145	-25.34	145	-25.34	884	22	567	168
hsa-let-7e-5p	ENSG00000228791	ENST00000594183.1	THRB-AS1	145	-20.25	145	-20.25	899	22	837	39
hsa-let-7e-5p	ENSG00000228791	ENST00000807237.1	THRB-AS1	147	-21.61	147	-21.61	903	22	801	419
hsa-let-7e-5p	ENSG00000228791	ENST00000807238.1	THRB-AS1	147	-21.61	147	-21.61	904	22	635	363
hsa-let-7e-5p	ENSG00000273033	ENST00000610128.2	LINC02035	425	-51.74	143	-24.44	906	22	5476	61	2054	3921
hsa-let-7e-5p	ENSG00000243550	ENST00000716186.1	LINC01214	144	-17.82	144	-17.82	945	22	488	3
hsa-let-7e-5p	ENSG00000243550	ENST00000749918.1	LINC01214	144	-17.82	144	-17.82	946	22	460	37
hsa-let-7e-5p	ENSG00000243550	ENST00000749917.1	LINC01214	144	-17.82	144	-17.82	947	22	407	59
hsa-let-7e-5p	ENSG00000243550	ENST00000692847.3	LINC01214	574	-72.51	147	-19.12	952	22	2194	1152	38	468	233
hsa-let-7e-5p	ENSG00000243550	ENST00000716189.1	LINC01214	140	-17.84	140	-17.84	953	22	1077	867
hsa-let-7e-5p	ENSG00000243550	ENST00000749933.1	LINC01214	284	-35.66	144	-17.84	954	22	541	47	360
hsa-let-7e-5p	ENSG00000243550	ENST00000749935.1	LINC01214	140	-17.84	140	-17.84	955	22	415	237
hsa-let-7e-5p	ENSG00000243550	ENST00000749945.1	LINC01214	140	-17.84	140	-17.84	956	22	484	307
hsa-let-7e-5p	ENSG00000243550	ENST00000749937.1	LINC01214	140	-17.84	140	-17.84	957	22	364	187
hsa-let-7e-5p	ENSG00000243550	ENST00000749936.1	LINC01214	140	-17.84	140	-17.84	958	22	561	384
hsa-let-7e-5p	ENSG00000243550	ENST00000749916.1	LINC01214	140	-17.84	140	-17.84	959	22	1132	955
hsa-let-7e-5p	ENSG00000260918	ENST00000562284.1	AC107398.3	882	-135.57	160	-30.17	964	22	7000	308	923	3886	3792	941	5326
hsa-let-7e-5p	ENSG00000251442	ENST00000778506.1	LINC01094	284	-35.32	143	-18.44	965	22	1536	800	646
hsa-let-7e-5p	ENSG00000251442	ENST00000668669.1	LINC01094	284	-35.32	143	-18.44	966	22	2476	756	602
hsa-let-7e-5p	ENSG00000251442	ENST00000671622.2	LINC01094	284	-35.32	143	-18.44	968	22	2989	778	624
hsa-let-7e-5p	ENSG00000251442	ENST00000656991.2	LINC01094	284	-35.32	143	-18.44	971	22	2393	686	532
hsa-let-7e-5p	ENSG00000251442	ENST00000503539.8	LINC01094	284	-35.32	143	-18.44	972	22	2509	795	641
hsa-let-7e-5p	ENSG00000251442	ENST00000507802.6	LINC01094	284	-35.32	143	-18.44	973	22	2485	734	580
hsa-let-7e-5p	ENSG00000251442	ENST00000687467.2	LINC01094	284	-35.32	143	-18.44	975	22	2119	534	380
hsa-let-7e-5p	ENSG00000251442	ENST00000504675.7	LINC01094	284	-35.32	143	-18.44	977	22	2336	762	608
hsa-let-7e-5p	ENSG00000251442	ENST00000701241.1	LINC01094	284	-35.32	143	-18.44	978	22	1831	748	594
hsa-let-7e-5p	ENSG00000251442	ENST00000663250.2	LINC01094	284	-35.32	143	-18.44	979	22	2383	593	439
hsa-let-7e-5p	ENSG00000251442	ENST00000778513.1	LINC01094	284	-35.32	143	-18.44	980	22	1128	841	687
hsa-let-7e-5p	ENSG00000251442	ENST00000701906.2	LINC01094	284	-35.32	143	-18.44	981	22	1300	548	394
hsa-let-7e-5p	ENSG00000251442	ENST00000670146.2	LINC01094	284	-35.32	143	-18.44	982	22	1967	679	525
hsa-let-7e-5p	ENSG00000251442	ENST00000778512.1	LINC01094	284	-35.32	143	-18.44	984	22	1490	326	172
hsa-let-7e-5p	ENSG00000251442	ENST00000512322.2	LINC01094	284	-35.32	143	-18.44	985	22	2225	516	362
hsa-let-7e-5p	ENSG00000251442	ENST00000654343.1	LINC01094	284	-35.32	143	-18.44	986	22	1680	400	246
hsa-let-7e-5p	ENSG00000251442	ENST00000654792.1	LINC01094	284	-35.32	143	-18.44	987	22	1778	498	344
hsa-let-7e-5p	ENSG00000251442	ENST00000652918.1	LINC01094	284	-35.32	143	-18.44	988	22	2207	456	302
hsa-let-7e-5p	ENSG00000251442	ENST00000778523.1	LINC01094	305	-42.59	157	-22.75	989	22	2647	1163	1099
hsa-let-7e-5p	ENSG00000251442	ENST00000667455.1	LINC01094	284	-35.32	143	-18.44	990	22	2266	567	413
hsa-let-7e-5p	ENSG00000251442	ENST00000653916.2	LINC01094	284	-35.32	143	-18.44	991	22	1180	444	290
hsa-let-7e-5p	ENSG00000251442	ENST00000778505.1	LINC01094	143	-18.96	143	-18.96	993	22	1070	204
hsa-let-7e-5p	ENSG00000251442	ENST00000661741.1	LINC01094	284	-35.32	143	-18.44	996	22	1480	675	521
hsa-let-7e-5p	ENSG00000251442	ENST00000778521.1	LINC01094	284	-35.32	143	-18.44	997	22	1158	428	274
hsa-let-7e-5p	ENSG00000251442	ENST00000778515.1	LINC01094	143	-18.96	143	-18.96	1001	22	968	102
hsa-let-7e-5p	ENSG00000251442	ENST00000778514.1	LINC01094	143	-18.96	143	-18.96	1002	22	1151	277
hsa-let-7e-5p	ENSG00000251442	ENST00000778516.1	LINC01094	143	-18.96	143	-18.96	1003	22	1033	167
hsa-let-7e-5p	ENSG00000251442	ENST00000778518.1	LINC01094	143	-18.96	143	-18.96	1006	22	611	281
hsa-let-7e-5p	ENSG00000251442	ENST00000778517.1	LINC01094	143	-18.96	143	-18.96	1007	22	1030	164
hsa-let-7e-5p	ENSG00000284968	ENST00000508280.6	AC093827.4	145	-25.34	145	-25.34	1008	22	2158	414
hsa-let-7e-5p	ENSG00000284968	ENST00000506484.1	AC093827.4	145	-25.34	145	-25.34	1009	22	898	391
hsa-let-7e-5p	ENSG00000272320	ENST00000607565.1	AL445309.1	147	-17.65	147	-17.65	1024	22	1989	1633
hsa-let-7e-5p	ENSG00000261211	ENST00000563225.2	AL031123.2	313	-42.79	161	-25.85	1026	22	6640	3944	2219
hsa-let-7e-5p	ENSG00000234155	ENST00000840426.1	LINC02535	148	-23.74	148	-23.74	1043	22	2606	1823
hsa-let-7e-5p	ENSG00000234155	ENST00000455071.2	LINC02535	148	-23.74	148	-23.74	1044	22	2576	1793
hsa-let-7e-5p	ENSG00000230943	ENST00000788889.1	LINC02541	598	-85.73	158	-24.92	1060	22	1451	1001	976	646	131
hsa-let-7e-5p	ENSG00000230943	ENST00000788910.1	LINC02541	598	-85.73	158	-24.92	1061	22	1600	1151	1126	796	332
hsa-let-7e-5p	ENSG00000230943	ENST00000788883.1	LINC02541	598	-85.73	158	-24.92	1062	22	1417	968	943	613	149
hsa-let-7e-5p	ENSG00000230943	ENST00000788912.1	LINC02541	598	-85.73	158	-24.92	1063	22	1646	1198	1173	843	296
hsa-let-7e-5p	ENSG00000230943	ENST00000788911.1	LINC02541	598	-85.73	158	-24.92	1064	22	1480	1032	1007	847	332
hsa-let-7e-5p	ENSG00000230943	ENST00000788915.1	LINC02541	598	-85.73	158	-24.92	1065	22	1497	1050	1025	695	214
hsa-let-7e-5p	ENSG00000230943	ENST00000788913.1	LINC02541	598	-85.73	158	-24.92	1066	22	1590	1143	1118	788	273
hsa-let-7e-5p	ENSG00000230943	ENST00000654213.2	LINC02541	598	-85.73	158	-24.92	1067	22	1707	1260	1235	905	307
hsa-let-7e-5p	ENSG00000230943	ENST00000788903.1	LINC02541	598	-85.73	158	-24.92	1068	22	1474	1027	1002	672	191
hsa-let-7e-5p	ENSG00000230943	ENST00000788902.1	LINC02541	598	-85.73	158	-24.92	1069	22	1610	1163	1138	808	210
hsa-let-7e-5p	ENSG00000230943	ENST00000788900.1	LINC02541	598	-85.73	158	-24.92	1070	22	1483	1036	1011	681	217
hsa-let-7e-5p	ENSG00000230943	ENST00000788899.1	LINC02541	598	-85.73	158	-24.92	1071	22	1627	1180	1155	825	222
hsa-let-7e-5p	ENSG00000230943	ENST00000788898.1	LINC02541	598	-85.73	158	-24.92	1072	22	1665	1218	1193	863	261
hsa-let-7e-5p	ENSG00000230943	ENST00000788886.1	LINC02541	458	-69.6	158	-24.92	1073	22	1208	761	736	406
hsa-let-7e-5p	ENSG00000230943	ENST00000788885.1	LINC02541	598	-85.73	158	-24.92	1074	22	1504	1057	1032	702	104
hsa-let-7e-5p	ENSG00000230943	ENST00000788901.1	LINC02541	598	-85.73	158	-24.92	1075	22	1534	1090	1065	735	220
hsa-let-7e-5p	ENSG00000230943	ENST00000788887.1	LINC02541	598	-85.73	158	-24.92	1076	22	1438	994	969	639	124
hsa-let-7e-5p	ENSG00000230943	ENST00000788884.1	LINC02541	598	-85.73	158	-24.92	1077	22	1429	985	960	630	115
hsa-let-7e-5p	ENSG00000230943	ENST00000649523.1	LINC02541	598	-85.73	158	-24.92	1078	22	1879	1459	1434	1100	553
hsa-let-7e-5p	ENSG00000230943	ENST00000788888.1	LINC02541	598	-85.73	158	-24.92	1079	22	1264	1014	989	659	112
hsa-let-7e-5p	ENSG00000230943	ENST00000788897.1	LINC02541	598	-85.73	158	-24.92	1080	22	1286	1039	1014	684	220
hsa-let-7e-5p	ENSG00000230943	ENST00000788908.1	LINC02541	289	-36.17	149	-20.04	1081	22	1160	882	231
hsa-let-7e-5p	ENSG00000230943	ENST00000657627.1	LINC02541	140	-16.13	140	-16.13	1082	22	802	256
hsa-let-7e-5p	ENSG00000230943	ENST00000427157.1	LINC02541	140	-16.13	140	-16.13	1083	22	327	119
hsa-let-7e-5p	ENSG00000230943	ENST00000452675.3	LINC02541	140	-16.13	140	-16.13	1084	22	621	432
hsa-let-7e-5p	ENSG00000230943	ENST00000788909.1	LINC02541	140	-16.13	140	-16.13	1085	22	515	326
hsa-let-7e-5p	ENSG00000230943	ENST00000701104.2	LINC02541	140	-16.13	140	-16.13	1086	22	780	591
hsa-let-7e-5p	ENSG00000230943	ENST00000788894.1	LINC02541	140	-16.13	140	-16.13	1087	22	470	281
hsa-let-7e-5p	ENSG00000230943	ENST00000788891.1	LINC02541	140	-16.13	140	-16.13	1088	22	500	313
hsa-let-7e-5p	ENSG00000230943	ENST00000788916.1	LINC02541	140	-16.13	140	-16.13	1089	22	562	378
hsa-let-7e-5p	ENSG00000230943	ENST00000788914.1	LINC02541	140	-16.13	140	-16.13	1090	22	493	309
hsa-let-7e-5p	ENSG00000230943	ENST00000788906.1	LINC02541	140	-16.13	140	-16.13	1091	22	439	255
hsa-let-7e-5p	ENSG00000230943	ENST00000788905.1	LINC02541	140	-16.13	140	-16.13	1092	22	413	229
hsa-let-7e-5p	ENSG00000230943	ENST00000788904.1	LINC02541	140	-16.13	140	-16.13	1093	22	573	389
hsa-let-7e-5p	ENSG00000230943	ENST00000788896.1	LINC02541	140	-16.13	140	-16.13	1094	22	416	232
hsa-let-7e-5p	ENSG00000230943	ENST00000788893.1	LINC02541	140	-16.13	140	-16.13	1095	22	774	590
hsa-let-7e-5p	ENSG00000230943	ENST00000788892.1	LINC02541	140	-16.13	140	-16.13	1096	22	882	698
hsa-let-7e-5p	ENSG00000230943	ENST00000788890.1	LINC02541	140	-16.13	140	-16.13	1097	22	469	285
hsa-let-7e-5p	ENSG00000230943	ENST00000788907.1	LINC02541	140	-16.13	140	-16.13	1098	22	989	808
hsa-let-7e-5p	ENSG00000230943	ENST00000788895.1	LINC02541	140	-16.13	140	-16.13	1099	22	472	291
hsa-let-7e-5p	ENSG00000237070	ENST00000451240.1	AC005550.2	142	-14.29	142	-14.29	1102	22	3743	2857
hsa-let-7e-5p	ENSG00000122548	ENST00000242109.6	KIAA0087	287	-42.97	145	-25.34	1128	22	4354	2947	2112
hsa-let-7e-5p	ENSG00000233760	ENST00000780909.1	AC004947.1	141	-15.1	141	-15.1	1129	22	1746	1027
hsa-let-7e-5p	ENSG00000233760	ENST00000667848.1	AC004947.1	141	-15.1	141	-15.1	1131	22	1465	483
hsa-let-7e-5p	ENSG00000233760	ENST00000420912.2	AC004947.1	141	-15.1	141	-15.1	1132	22	2857	423
hsa-let-7e-5p	ENSG00000233760	ENST00000457000.2	AC004947.1	141	-15.1	141	-15.1	1133	22	1431	404
hsa-let-7e-5p	ENSG00000233760	ENST00000780911.1	AC004947.1	141	-15.1	141	-15.1	1134	22	1532	404
hsa-let-7e-5p	ENSG00000233760	ENST00000654600.2	AC004947.1	141	-15.1	141	-15.1	1135	22	1405	399
hsa-let-7e-5p	ENSG00000233760	ENST00000780910.1	AC004947.1	141	-15.1	141	-15.1	1136	22	1483	390
hsa-let-7e-5p	ENSG00000233760	ENST00000653682.1	AC004947.1	141	-15.1	141	-15.1	1137	22	2669	371
hsa-let-7e-5p	ENSG00000233760	ENST00000660447.1	AC004947.1	141	-15.1	141	-15.1	1138	22	1293	349
hsa-let-7e-5p	ENSG00000233760	ENST00000430426.3	AC004947.1	141	-15.1	141	-15.1	1139	22	841	335
hsa-let-7e-5p	ENSG00000271553	ENST00000605836.1	AC018638.7	144	-18.97	144	-18.97	1141	22	1114	361
hsa-let-7e-5p	ENSG00000227121	ENST00000765539.1	AC073174.1	142	-25.02	142	-25.02	1175	22	1078	919
hsa-let-7e-5p	ENSG00000227121	ENST00000765540.1	AC073174.1	142	-25.02	142	-25.02	1176	22	1091	934
hsa-let-7e-5p	ENSG00000237523	ENST00000819800.1	LINC00857	144	-19.62	144	-19.62	1183	22	1377	897
hsa-let-7e-5p	ENSG00000269609	ENST00000755285.1	RPARP-AS1	162	-26.63	162	-26.63	1193	22	1240	332
hsa-let-7e-5p	ENSG00000269609	ENST00000755282.1	RPARP-AS1	162	-26.63	162	-26.63	1194	22	1218	302
hsa-let-7e-5p	ENSG00000269609	ENST00000755283.1	RPARP-AS1	162	-26.63	162	-26.63	1195	22	1244	328
hsa-let-7e-5p	ENSG00000269609	ENST00000755284.1	RPARP-AS1	162	-26.63	162	-26.63	1196	22	1416	500
hsa-let-7e-5p	ENSG00000269609	ENST00000473970.4	RPARP-AS1	162	-26.63	162	-26.63	1197	22	1313	396
hsa-let-7e-5p	ENSG00000269609	ENST00000494270.7	RPARP-AS1	162	-26.63	162	-26.63	1198	22	2068	1184
hsa-let-7e-5p	ENSG00000269609	ENST00000663480.3	RPARP-AS1	162	-26.63	162	-26.63	1199	22	1549	633
hsa-let-7e-5p	ENSG00000269609	ENST00000755287.1	RPARP-AS1	162	-26.63	162	-26.63	1200	22	1549	637
hsa-let-7e-5p	ENSG00000269609	ENST00000657934.2	RPARP-AS1	162	-26.63	162	-26.63	1201	22	1455	539
hsa-let-7e-5p	ENSG00000269609	ENST00000755288.1	RPARP-AS1	162	-26.63	162	-26.63	1202	22	1442	530
hsa-let-7e-5p	ENSG00000269609	ENST00000755286.1	RPARP-AS1	162	-26.63	162	-26.63	1203	22	1411	495
hsa-let-7e-5p	ENSG00000269609	ENST00000755289.1	RPARP-AS1	162	-26.63	162	-26.63	1204	22	1198	286
hsa-let-7e-5p	ENSG00000269609	ENST00000492465.2	RPARP-AS1	162	-26.63	162	-26.63	1205	22	1556	644
hsa-let-7e-5p	ENSG00000269609	ENST00000669625.1	RPARP-AS1	162	-26.63	162	-26.63	1206	22	1178	262
hsa-let-7e-5p	ENSG00000269609	ENST00000670059.1	RPARP-AS1	162	-26.63	162	-26.63	1207	22	1162	250
hsa-let-7e-5p	ENSG00000269609	ENST00000594818.1	RPARP-AS1	162	-26.63	162	-26.63	1208	22	445	183
hsa-let-7e-5p	ENSG00000269609	ENST00000596366.1	RPARP-AS1	162	-26.63	162	-26.63	1209	22	631	129
hsa-let-7e-5p	ENSG00000269609	ENST00000659211.1	RPARP-AS1	162	-26.63	162	-26.63	1211	22	2313	1429
hsa-let-7e-5p	ENSG00000269609	ENST00000755290.1	RPARP-AS1	162	-26.63	162	-26.63	1212	22	1123	211
hsa-let-7e-5p	ENSG00000269609	ENST00000597488.1	RPARP-AS1	294	-46.19	153	-23.68	1213	22	1938	835	860
hsa-let-7e-5p	ENSG00000269609	ENST00000598368.2	RPARP-AS1	310	-48.75	162	-26.63	1214	22	2458	1542	128
hsa-let-7e-5p	ENSG00000255367	ENST00000717888.1	AC127526.2	147	-22.51	147	-22.51	1299	22	596	340
hsa-let-7e-5p	ENSG00000255367	ENST00000717891.1	AC127526.2	147	-22.51	147	-22.51	1302	22	699	367
hsa-let-7e-5p	ENSG00000255367	ENST00000717895.1	AC127526.2	153	-16.81	153	-16.81	1307	22	1048	504
hsa-let-7e-5p	ENSG00000257052	ENST00000751147.1	AP003721.4	142	-23.29	142	-23.29	1309	22	1507	571
hsa-let-7e-5p	ENSG00000257052	ENST00000544421.2	AP003721.4	142	-23.29	142	-23.29	1310	22	1362	569
hsa-let-7e-5p	ENSG00000255478	ENST00000533886.1	AP000944.1	290	-41.46	147	-24.01	1312	22	564	23	1
hsa-let-7e-5p	ENSG00000257660	ENST00000803322.1	AC117498.2	142	-24.07	142	-24.07	1352	22	541	244
hsa-let-7e-5p	ENSG00000255970	ENST00000542219.1	LINC02421	141	-14.64	141	-14.64	1356	22	3135	2752
hsa-let-7e-5p	ENSG00000241388	ENST00000760046.1	HNF1A-AS1	150	-22.11	150	-22.11	1359	22	630	144
hsa-let-7e-5p	ENSG00000241388	ENST00000619441.2	HNF1A-AS1	150	-22.11	150	-22.11	1360	22	514	143
hsa-let-7e-5p	ENSG00000241388	ENST00000647473.1	HNF1A-AS1	299	-41.3	150	-22.11	1361	22	1144	136	889
hsa-let-7e-5p	ENSG00000241388	ENST00000701238.2	HNF1A-AS1	150	-22.11	150	-22.11	1363	22	599	173
hsa-let-7e-5p	ENSG00000241388	ENST00000760048.1	HNF1A-AS1	150	-22.11	150	-22.11	1364	22	636	104
hsa-let-7e-5p	ENSG00000241388	ENST00000760049.1	HNF1A-AS1	150	-22.11	150	-22.11	1365	22	750	104
hsa-let-7e-5p	ENSG00000241388	ENST00000760047.1	HNF1A-AS1	150	-22.11	150	-22.11	1366	22	754	173
hsa-let-7e-5p	ENSG00000241388	ENST00000760050.1	HNF1A-AS1	150	-22.11	150	-22.11	1368	22	585	104
hsa-let-7e-5p	ENSG00000241388	ENST00000537361.2	HNF1A-AS1	150	-22.11	150	-22.11	1369	22	687	139
hsa-let-7e-5p	ENSG00000241388	ENST00000535301.2	HNF1A-AS1	150	-22.11	150	-22.11	1372	22	546	170
hsa-let-7e-5p	ENSG00000258548	ENST00000794993.1	LINC00645	147	-17.66	147	-17.66	1396	22	349	225
hsa-let-7e-5p	ENSG00000258548	ENST00000662039.1	LINC00645	143	-21.87	143	-21.87	1397	22	931	648
hsa-let-7e-5p	ENSG00000235269	ENST00000728987.1	LINC02331	142	-21.96	142	-21.96	1404	22	2327	1305
hsa-let-7e-5p	ENSG00000235269	ENST00000728988.1	LINC02331	142	-21.96	142	-21.96	1405	22	2086	1184
hsa-let-7e-5p	ENSG00000235269	ENST00000418927.3	LINC02331	142	-21.96	142	-21.96	1406	22	2316	1425
hsa-let-7e-5p	ENSG00000235269	ENST00000728989.1	LINC02331	142	-21.96	142	-21.96	1407	22	1833	1604
hsa-let-7e-5p	ENSG00000235269	ENST00000728991.1	LINC02331	154	-20.61	154	-20.61	1408	22	1257	117
hsa-let-7e-5p	ENSG00000259230	ENST00000716870.1	LINC02323	145	-25.34	145	-25.34	1415	22	1370	798
hsa-let-7e-5p	ENSG00000259230	ENST00000766588.1	LINC02323	145	-25.34	145	-25.34	1417	22	1118	532
hsa-let-7e-5p	ENSG00000259230	ENST00000766593.1	LINC02323	145	-25.34	145	-25.34	1422	22	863	291
hsa-let-7e-5p	ENSG00000251533	ENST00000805819.1	LINC00605	144	-26.32	144	-26.32	1431	22	1387	651
hsa-let-7e-5p	ENSG00000251533	ENST00000805824.1	LINC00605	144	-26.32	144	-26.32	1432	22	788	421
hsa-let-7e-5p	ENSG00000251533	ENST00000805820.1	LINC00605	144	-26.32	144	-26.32	1433	22	1017	651
hsa-let-7e-5p	ENSG00000251533	ENST00000514902.3	LINC00605	144	-26.32	144	-26.32	1434	22	1559	828
hsa-let-7e-5p	ENSG00000251533	ENST00000805829.1	LINC00605	144	-26.32	144	-26.32	1435	22	1722	991
hsa-let-7e-5p	ENSG00000251533	ENST00000805828.1	LINC00605	144	-26.32	144	-26.32	1436	22	695	330
hsa-let-7e-5p	ENSG00000251533	ENST00000805827.1	LINC00605	144	-26.32	144	-26.32	1437	22	1124	393
hsa-let-7e-5p	ENSG00000251533	ENST00000805825.1	LINC00605	144	-26.32	144	-26.32	1438	22	1582	851
hsa-let-7e-5p	ENSG00000251533	ENST00000805823.1	LINC00605	144	-26.32	144	-26.32	1439	22	1392	661
hsa-let-7e-5p	ENSG00000251533	ENST00000805821.1	LINC00605	144	-26.32	144	-26.32	1440	22	1054	689
hsa-let-7e-5p	ENSG00000251533	ENST00000805822.1	LINC00605	144	-26.32	144	-26.32	1441	22	891	526
hsa-let-7e-5p	ENSG00000251533	ENST00000805818.1	LINC00605	144	-26.32	144	-26.32	1442	22	1085	720
hsa-let-7e-5p	ENSG00000251533	ENST00000805817.1	LINC00605	144	-26.32	144	-26.32	1443	22	1344	613
hsa-let-7e-5p	ENSG00000251533	ENST00000805816.1	LINC00605	144	-26.32	144	-26.32	1444	22	1738	1373
hsa-let-7e-5p	ENSG00000251533	ENST00000805826.1	LINC00605	144	-26.32	144	-26.32	1445	22	1267	539
hsa-let-7e-5p	ENSG00000236377	ENST00000435733.2	AC084809.2	146	-25.34	146	-25.34	1467	22	3024	2227
hsa-let-7e-5p	ENSG00000268108	ENST00000597865.1	AC008687.2	140	-17.83	140	-17.83	1483	22	520	180
hsa-let-7e-5p	ENSG00000235621	ENST00000660785.1	LINC00494	146	-23.53	146	-23.53	1493	22	2630	2494
hsa-let-7e-5p	ENSG00000235621	ENST00000692154.1	LINC00494	146	-23.53	146	-23.53	1495	22	2310	2162
hsa-let-7e-5p	ENSG00000235621	ENST00000416742.5	LINC00494	146	-23.53	146	-23.53	1496	22	3544	2793
hsa-let-7e-5p	ENSG00000235621	ENST00000655482.1	LINC00494	146	-23.53	146	-23.53	1498	22	3418	2660
hsa-let-7e-5p	ENSG00000235621	ENST00000545181.5	LINC00494	146	-23.53	146	-23.53	1499	22	3343	2592
hsa-let-7e-5p	ENSG00000235621	ENST00000433094.1	LINC00494	146	-23.53	146	-23.53	1500	22	3071	2320
hsa-let-7e-5p	ENSG00000277067	ENST00000615804.1	CU634019.1	151	-19.8	151	-19.8	1546	22	2195	12
hsa-let-7e-5p	ENSG00000249923	ENST00000506039.2	AC007663.2	319	-50.41	165	-25.91	1558	22	2513	789	98
hsa-let-7e-5p	ENSG00000249923	ENST00000824279.1	AC007663.2	154	-24.5	154	-24.5	1559	22	2023	111
hsa-let-7e-5p	ENSG00000249923	ENST00000824282.1	AC007663.2	154	-24.5	154	-24.5	1560	22	858	105
hsa-let-7e-5p	ENSG00000249923	ENST00000824274.1	AC007663.2	154	-24.5	154	-24.5	1561	22	923	172
hsa-let-7e-5p	ENSG00000249923	ENST00000824273.1	AC007663.2	154	-24.5	154	-24.5	1562	22	923	175
hsa-let-7e-5p	ENSG00000226328	ENST00000426282.7	NUP50-AS1	149	-26.11	149	-26.11	1570	22	2095	1487
hsa-let-7e-5p	ENSG00000236393	ENST00000738318.1	AC091806.1	152	-19.21	152	-19.21	1591	22	1912	1717
hsa-let-7e-5p	ENSG00000236393	ENST00000452690.1	AC091806.1	288	-43.08	145	-25.34	1592	22	3000	2430	1567
hsa-let-7e-5p	ENSG00000236393	ENST00000738319.1	AC091806.1	152	-19.21	152	-19.21	1595	22	1027	834
hsa-let-7e-5p	ENSG00000236393	ENST00000738321.1	AC091806.1	152	-19.21	152	-19.21	1597	22	1086	934
hsa-let-7e-5p	ENSG00000236393	ENST00000738320.1	AC091806.1	152	-19.21	152	-19.21	1599	22	904	709
hsa-let-7e-5p	ENSG00000236393	ENST00000738322.1	AC091806.1	152	-19.21	152	-19.21	1600	22	988	836
hsa-let-7e-5p	ENSG00000231535	ENST00000665487.1	LINC00278	292	-41.36	149	-25.4	1609	22	1341	399	540
hsa-let-7e-5p	ENSG00000231535	ENST00000651090.1	LINC00278	292	-41.36	149	-25.4	1613	22	1582	640	781
hsa-miR-2682-5p	ENSG00000284708	ENST00000642131.1	AL031731.1	141	-16.77	141	-16.77	1625	23	2094	1823
hsa-miR-2682-5p	ENSG00000224259	ENST00000772287.1	LINC01133	154	-24.4	154	-24.4	1636	23	1325	379
hsa-miR-2682-5p	ENSG00000224259	ENST00000635112.2	LINC01133	141	-15.83	141	-15.83	1637	23	2363	2043
hsa-miR-2682-5p	ENSG00000224259	ENST00000443364.8	LINC01133	154	-24.4	154	-24.4	1644	23	1358	314
hsa-miR-2682-5p	ENSG00000224259	ENST00000772290.1	LINC01133	154	-24.4	154	-24.4	1645	23	539	314
hsa-miR-2682-5p	ENSG00000224259	ENST00000772292.1	LINC01133	154	-24.4	154	-24.4	1647	23	369	245
hsa-miR-2682-5p	ENSG00000224259	ENST00000701616.2	LINC01133	154	-24.4	154	-24.4	1648	23	795	240
hsa-miR-2682-5p	ENSG00000224259	ENST00000772284.1	LINC01133	154	-24.4	154	-24.4	1649	23	932	239
hsa-miR-2682-5p	ENSG00000224259	ENST00000772280.1	LINC01133	154	-24.4	154	-24.4	1652	23	717	217
hsa-miR-2682-5p	ENSG00000228791	ENST00000629562.3	THRB-AS1	142	-17.2	142	-17.2	1701	23	2257	1564
hsa-miR-2682-5p	ENSG00000244300	ENST00000468377.1	GATA2-AS1	144	-15.94	144	-15.94	1728	23	1578	1367
hsa-miR-2682-5p	ENSG00000244300	ENST00000669945.1	GATA2-AS1	144	-15.94	144	-15.94	1732	23	1655	822
hsa-miR-2682-5p	ENSG00000243550	ENST00000749934.1	LINC01214	151	-17.01	151	-17.01	1742	23	476	113
hsa-miR-2682-5p	ENSG00000243550	ENST00000665600.2	LINC01214	151	-17.01	151	-17.01	1743	23	490	119
hsa-miR-2682-5p	ENSG00000243550	ENST00000749928.1	LINC01214	151	-17.01	151	-17.01	1747	23	846	346
hsa-miR-2682-5p	ENSG00000260918	ENST00000562284.1	AC107398.3	595	-68.03	160	-20.35	1776	23	7000	4572	1210	3734	533
hsa-miR-2682-5p	ENSG00000251442	ENST00000778506.1	LINC01094	151	-16.09	151	-16.09	1777	23	1536	9
hsa-miR-2682-5p	ENSG00000251442	ENST00000668669.1	LINC01094	145	-17.33	145	-17.33	1778	23	2476	1834
hsa-miR-2682-5p	ENSG00000251442	ENST00000671622.2	LINC01094	145	-17.33	145	-17.33	1780	23	2989	1856
hsa-miR-2682-5p	ENSG00000251442	ENST00000656991.2	LINC01094	145	-17.33	145	-17.33	1783	23	2393	1764
hsa-miR-2682-5p	ENSG00000251442	ENST00000503539.8	LINC01094	145	-17.33	145	-17.33	1784	23	2509	1873
hsa-miR-2682-5p	ENSG00000251442	ENST00000507802.6	LINC01094	145	-17.33	145	-17.33	1785	23	2485	1812
hsa-miR-2682-5p	ENSG00000251442	ENST00000687467.2	LINC01094	145	-17.33	145	-17.33	1787	23	2119	1612
hsa-miR-2682-5p	ENSG00000251442	ENST00000504675.7	LINC01094	145	-17.33	145	-17.33	1789	23	2336	1840
hsa-miR-2682-5p	ENSG00000251442	ENST00000512322.2	LINC01094	145	-17.33	145	-17.33	1797	23	2225	1594
hsa-miR-2682-5p	ENSG00000251442	ENST00000652918.1	LINC01094	145	-17.33	145	-17.33	1800	23	2207	1534
hsa-miR-2682-5p	ENSG00000251442	ENST00000778523.1	LINC01094	143	-17.69	143	-17.69	1801	23	2647	837
hsa-miR-2682-5p	ENSG00000251442	ENST00000667455.1	LINC01094	145	-17.33	145	-17.33	1802	23	2266	1645
hsa-miR-2682-5p	ENSG00000272320	ENST00000607565.1	AL445309.1	145	-14.76	145	-14.76	1836	23	1989	1744
hsa-miR-2682-5p	ENSG00000261211	ENST00000563225.2	AL031123.2	142	-19.36	142	-19.36	1838	23	6640	2553
hsa-miR-2682-5p	ENSG00000266680	ENST00000584934.1	AL135905.1	144	-14.53	144	-14.53	1852	23	1404	360
hsa-miR-2682-5p	ENSG00000234155	ENST00000840428.1	LINC02535	145	-18.9	145	-18.9	1853	23	1251	630
hsa-miR-2682-5p	ENSG00000234155	ENST00000840427.1	LINC02535	145	-18.9	145	-18.9	1854	23	1077	543
hsa-miR-2682-5p	ENSG00000232316	ENST00000835249.1	LINC02518	140	-21.53	140	-21.53	1863	23	594	496
hsa-miR-2682-5p	ENSG00000232316	ENST00000835250.1	LINC02518	140	-21.53	140	-21.53	1864	23	449	357
hsa-miR-2682-5p	ENSG00000230943	ENST00000649523.1	LINC02541	151	-18.93	151	-18.93	1890	23	1879	106
hsa-miR-2682-5p	ENSG00000230943	ENST00000701104.2	LINC02541	299	-39.15	151	-20.22	1898	23	780	144	75
hsa-miR-2682-5p	ENSG00000230943	ENST00000788893.1	LINC02541	151	-18.93	151	-18.93	1907	23	774	143
hsa-miR-2682-5p	ENSG00000230943	ENST00000788892.1	LINC02541	151	-18.93	151	-18.93	1908	23	882	251
hsa-miR-2682-5p	ENSG00000230943	ENST00000788907.1	LINC02541	151	-18.93	151	-18.93	1910	23	989	13
hsa-miR-2682-5p	ENSG00000285427	ENST00000535372.1	SOD2-OT1	151	-29.27	151	-29.27	1912	23	1718	261
hsa-miR-2682-5p	ENSG00000237070	ENST00000451240.1	AC005550.2	164	-26.84	164	-26.84	1914	23	3743	399
hsa-miR-2682-5p	ENSG00000236039	ENST00000658415.1	AC019117.1	140	-15.35	140	-15.35	1917	23	1998	1351
hsa-miR-2682-5p	ENSG00000236039	ENST00000664658.1	AC019117.1	140	-15.35	140	-15.35	1918	23	1786	1196
hsa-miR-2682-5p	ENSG00000236039	ENST00000454003.2	AC019117.1	280	-32.48	140	-17.13	1919	23	1721	857	1131
hsa-miR-2682-5p	ENSG00000236039	ENST00000658953.1	AC019117.1	140	-15.35	140	-15.35	1920	23	1852	1262
hsa-miR-2682-5p	ENSG00000236039	ENST00000659688.1	AC019117.1	140	-15.35	140	-15.35	1921	23	1971	1381
hsa-miR-2682-5p	ENSG00000236039	ENST00000657616.1	AC019117.1	280	-32.48	140	-17.13	1922	23	1937	1073	1347
hsa-miR-2682-5p	ENSG00000236039	ENST00000655831.1	AC019117.1	140	-15.35	140	-15.35	1923	23	1816	1226
hsa-miR-2682-5p	ENSG00000236039	ENST00000659904.1	AC019117.1	140	-15.35	140	-15.35	1924	23	1875	1285
hsa-miR-2682-5p	ENSG00000236039	ENST00000668924.1	AC019117.1	282	-31.73	142	-16.38	1925	23	1943	1083	1354
hsa-miR-2682-5p	ENSG00000236039	ENST00000656566.1	AC019117.1	140	-15.35	140	-15.35	1926	23	1357	1328
hsa-miR-2682-5p	ENSG00000236039	ENST00000662264.1	AC019117.1	140	-17.13	140	-17.13	1927	23	1324	1042
hsa-miR-2682-5p	ENSG00000236039	ENST00000843695.1	AC019117.1	141	-20.68	141	-20.68	1936	23	573	398
hsa-miR-2682-5p	ENSG00000236039	ENST00000843693.1	AC019117.1	141	-20.68	141	-20.68	1937	23	539	435
hsa-miR-2682-5p	ENSG00000122548	ENST00000242109.6	KIAA0087	310	-45.35	157	-24.11	1940	23	4354	2541	1675
hsa-miR-2682-5p	ENSG00000233760	ENST00000780912.1	AC004947.1	145	-15.71	145	-15.71	1942	23	1773	1392
hsa-miR-2682-5p	ENSG00000233760	ENST00000667848.1	AC004947.1	157	-19.31	157	-19.31	1943	23	1465	148
hsa-miR-2682-5p	ENSG00000233760	ENST00000420912.2	AC004947.1	157	-19.31	157	-19.31	1944	23	2857	88
hsa-miR-2682-5p	ENSG00000233760	ENST00000457000.2	AC004947.1	157	-19.31	157	-19.31	1945	23	1431	69
hsa-miR-2682-5p	ENSG00000233760	ENST00000780911.1	AC004947.1	157	-19.31	157	-19.31	1946	23	1532	69
hsa-miR-2682-5p	ENSG00000233760	ENST00000654600.2	AC004947.1	157	-19.31	157	-19.31	1947	23	1405	64
hsa-miR-2682-5p	ENSG00000233760	ENST00000780910.1	AC004947.1	157	-19.31	157	-19.31	1948	23	1483	55
hsa-miR-2682-5p	ENSG00000233760	ENST00000653682.1	AC004947.1	157	-19.31	157	-19.31	1949	23	2669	36
hsa-miR-2682-5p	ENSG00000233760	ENST00000660447.1	AC004947.1	157	-19.31	157	-19.31	1950	23	1293	14
hsa-miR-2682-5p	ENSG00000233760	ENST00000430426.3	AC004947.1	157	-19.31	157	-19.31	1951	23	841	1
hsa-miR-2682-5p	ENSG00000229591	ENST00000847087.1	AC006017.1	153	-18.63	153	-18.63	1955	23	853	70
hsa-miR-2682-5p	ENSG00000254109	ENST00000792122.1	RBPMS-AS1	144	-19.99	144	-19.99	1956	23	1520	410
hsa-miR-2682-5p	ENSG00000254109	ENST00000792123.1	RBPMS-AS1	144	-19.99	144	-19.99	1957	23	1293	414
hsa-miR-2682-5p	ENSG00000254109	ENST00000523643.6	RBPMS-AS1	144	-19.99	144	-19.99	1958	23	1372	503
hsa-miR-2682-5p	ENSG00000254109	ENST00000792128.1	RBPMS-AS1	144	-19.99	144	-19.99	1959	23	1005	577
hsa-miR-2682-5p	ENSG00000254109	ENST00000792131.1	RBPMS-AS1	144	-19.99	144	-19.99	1960	23	735	338
hsa-miR-2682-5p	ENSG00000254109	ENST00000792127.1	RBPMS-AS1	144	-19.99	144	-19.99	1961	23	1015	618
hsa-miR-2682-5p	ENSG00000254109	ENST00000792130.1	RBPMS-AS1	144	-19.99	144	-19.99	1962	23	575	179
hsa-miR-2682-5p	ENSG00000254109	ENST00000792129.1	RBPMS-AS1	144	-19.99	144	-19.99	1963	23	723	328
hsa-miR-2682-5p	ENSG00000254109	ENST00000792126.1	RBPMS-AS1	144	-19.99	144	-19.99	1964	23	816	421
hsa-miR-2682-5p	ENSG00000254109	ENST00000792125.1	RBPMS-AS1	144	-19.99	144	-19.99	1965	23	715	320
hsa-miR-2682-5p	ENSG00000254109	ENST00000792124.1	RBPMS-AS1	144	-19.99	144	-19.99	1966	23	582	187
hsa-miR-2682-5p	ENSG00000254109	ENST00000519753.2	RBPMS-AS1	144	-19.99	144	-19.99	1967	23	1036	641
hsa-miR-2682-5p	ENSG00000254109	ENST00000517521.5	RBPMS-AS1	144	-19.99	144	-19.99	1968	23	909	514
hsa-miR-2682-5p	ENSG00000254109	ENST00000792133.1	RBPMS-AS1	144	-19.99	144	-19.99	1969	23	1029	639
hsa-miR-2682-5p	ENSG00000254109	ENST00000792132.1	RBPMS-AS1	144	-19.99	144	-19.99	1970	23	951	561
hsa-miR-2682-5p	ENSG00000261655	ENST00000562459.1	AC100803.2	147	-26.23	147	-26.23	1975	23	1963	1484
hsa-miR-2682-5p	ENSG00000227121	ENST00000765539.1	AC073174.1	150	-15.72	150	-15.72	1987	23	1078	885
hsa-miR-2682-5p	ENSG00000227121	ENST00000765540.1	AC073174.1	150	-15.72	150	-15.72	1988	23	1091	900
hsa-miR-2682-5p	ENSG00000237523	ENST00000819791.1	LINC00857	292	-49.94	148	-26.25	1990	23	1632	462	233
hsa-miR-2682-5p	ENSG00000237523	ENST00000660450.2	LINC00857	438	-66.41	148	-26.25	1991	23	2499	282	2286	53
hsa-miR-2682-5p	ENSG00000237523	ENST00000819796.1	LINC00857	438	-66.41	148	-26.25	1992	23	1199	274	986	45
hsa-miR-2682-5p	ENSG00000237523	ENST00000819795.1	LINC00857	292	-49.94	148	-26.25	1993	23	1223	258	29
hsa-miR-2682-5p	ENSG00000237523	ENST00000819793.1	LINC00857	292	-49.94	148	-26.25	1994	23	1167	254	25
hsa-miR-2682-5p	ENSG00000237523	ENST00000819800.1	LINC00857	292	-49.94	148	-26.25	1995	23	1377	247	18
hsa-miR-2682-5p	ENSG00000237523	ENST00000671081.2	LINC00857	438	-66.41	148	-26.25	1996	23	2474	247	2261	18
hsa-miR-2682-5p	ENSG00000237523	ENST00000819797.1	LINC00857	290	-40.16	146	-23.69	1997	23	861	648	17
hsa-miR-2682-5p	ENSG00000237523	ENST00000819794.1	LINC00857	292	-49.94	148	-26.25	1998	23	1166	243	14
hsa-miR-2682-5p	ENSG00000237523	ENST00000819798.1	LINC00857	438	-66.41	148	-26.25	1999	23	2088	242	1875	13
hsa-miR-2682-5p	ENSG00000237523	ENST00000819799.1	LINC00857	437	-64.35	148	-26.25	2000	23	1161	225	947	1
hsa-miR-2682-5p	ENSG00000237523	ENST00000422847.1	LINC00857	146	-16.47	146	-16.47	2002	23	2161	1948
hsa-miR-2682-5p	ENSG00000269609	ENST00000598368.2	RPARP-AS1	142	-19.71	142	-19.71	2026	23	2458	1249
hsa-miR-2682-5p	ENSG00000255367	ENST00000717869.1	AC127526.2	140	-20.48	140	-20.48	2085	23	1836	1402
hsa-miR-2682-5p	ENSG00000255367	ENST00000717879.1	AC127526.2	140	-20.73	140	-20.73	2097	23	919	30
hsa-miR-2682-5p	ENSG00000255367	ENST00000717881.1	AC127526.2	299	-39.88	158	-20.84	2100	23	2910	2646	2153
hsa-miR-2682-5p	ENSG00000255367	ENST00000717895.1	AC127526.2	290	-46.84	149	-26.45	2119	23	1048	685	717
hsa-miR-2682-5p	ENSG00000257660	ENST00000803320.1	AC117498.2	443	-60.59	155	-20.55	2165	23	734	636	303	661
hsa-miR-2682-5p	ENSG00000257660	ENST00000803321.1	AC117498.2	443	-60.59	155	-20.55	2166	23	766	670	337	695
hsa-miR-2682-5p	ENSG00000255970	ENST00000542219.1	LINC02421	144	-22.71	144	-22.71	2168	23	3135	2579
hsa-miR-2682-5p	ENSG00000255970	ENST00000829389.1	LINC02421	159	-18.69	159	-18.69	2169	23	521	78
hsa-miR-2682-5p	ENSG00000271327	ENST00000605595.1	AC010201.2	140	-16.23	140	-16.23	2170	23	1495	960
hsa-miR-2682-5p	ENSG00000241388	ENST00000539163.1	HNF1A-AS1	165	-22.58	165	-22.58	2182	23	2455	2074
hsa-miR-2682-5p	ENSG00000241388	ENST00000433033.4	HNF1A-AS1	165	-22.58	165	-22.58	2183	23	737	542
hsa-miR-2682-5p	ENSG00000276476	ENST00000721755.1	LINC00540	160	-22.36	160	-22.36	2186	23	2390	1589
hsa-miR-2682-5p	ENSG00000276476	ENST00000690279.2	LINC00540	160	-22.36	160	-22.36	2197	23	2546	1745
hsa-miR-2682-5p	ENSG00000276476	ENST00000631321.1	LINC00540	160	-22.36	160	-22.36	2198	23	2412	1517
hsa-miR-2682-5p	ENSG00000276476	ENST00000659301.2	LINC00540	160	-22.36	160	-22.36	2201	23	2228	1333
hsa-miR-2682-5p	ENSG00000276476	ENST00000655363.2	LINC00540	160	-22.36	160	-22.36	2203	23	2215	1318
hsa-miR-2682-5p	ENSG00000276476	ENST00000616974.1	LINC00540	160	-22.36	160	-22.36	2204	23	2143	1251
hsa-miR-2682-5p	ENSG00000276476	ENST00000658741.1	LINC00540	160	-22.36	160	-22.36	2205	23	2206	1309
hsa-miR-2682-5p	ENSG00000258548	ENST00000557359.6	LINC00645	156	-20.16	156	-20.16	2210	23	3495	202
hsa-miR-2682-5p	ENSG00000258548	ENST00000557399.1	LINC00645	156	-20.16	156	-20.16	2212	23	3512	219
hsa-miR-2682-5p	ENSG00000258548	ENST00000669384.1	LINC00645	156	-20.16	156	-20.16	2213	23	3394	203
hsa-miR-2682-5p	ENSG00000258548	ENST00000662633.1	LINC00645	156	-20.16	156	-20.16	2214	23	821	155
hsa-miR-2682-5p	ENSG00000258548	ENST00000555350.1	LINC00645	156	-20.16	156	-20.16	2215	23	470	144
hsa-miR-2682-5p	ENSG00000236914	ENST00000559232.2	LINC01852	150	-22.37	150	-22.37	2258	23	2200	1617
hsa-miR-2682-5p	ENSG00000236914	ENST00000728309.1	LINC01852	150	-22.37	150	-22.37	2259	23	1960	1597
hsa-miR-2682-5p	ENSG00000262294	ENST00000717666.1	AC129507.2	142	-23.18	142	-23.18	2267	23	1972	513
hsa-miR-2682-5p	ENSG00000236377	ENST00000704359.1	AC084809.2	145	-16.23	145	-16.23	2278	23	1043	459
hsa-miR-2682-5p	ENSG00000236377	ENST00000435733.2	AC084809.2	291	-35.24	146	-19.01	2279	23	3024	2793	426
hsa-miR-2682-5p	ENSG00000236377	ENST00000704362.1	AC084809.2	145	-16.23	145	-16.23	2280	23	1050	495
hsa-miR-2682-5p	ENSG00000236377	ENST00000444464.2	AC084809.2	145	-16.23	145	-16.23	2281	23	1127	450
hsa-miR-2682-5p	ENSG00000266968	ENST00000590535.2	AC023421.1	152	-21.74	152	-21.74	2284	23	1785	380
hsa-miR-2682-5p	ENSG00000235621	ENST00000666125.1	LINC00494	144	-16.57	144	-16.57	2296	23	1329	233
hsa-miR-2682-5p	ENSG00000235621	ENST00000669689.1	LINC00494	144	-16.57	144	-16.57	2297	23	1054	225
hsa-miR-2682-5p	ENSG00000235621	ENST00000669055.1	LINC00494	144	-16.57	144	-16.57	2298	23	1426	225
hsa-miR-2682-5p	ENSG00000235621	ENST00000663665.1	LINC00494	144	-16.57	144	-16.57	2299	23	1535	225
hsa-miR-2682-5p	ENSG00000235621	ENST00000670744.1	LINC00494	144	-16.57	144	-16.57	2300	23	1385	218
hsa-miR-2682-5p	ENSG00000235621	ENST00000670842.1	LINC00494	144	-16.57	144	-16.57	2301	23	1839	206
hsa-miR-2682-5p	ENSG00000235621	ENST00000667132.1	LINC00494	144	-16.57	144	-16.57	2302	23	1231	200
hsa-miR-2682-5p	ENSG00000235621	ENST00000671184.1	LINC00494	144	-16.57	144	-16.57	2304	23	1118	195
hsa-miR-2682-5p	ENSG00000235621	ENST00000660785.1	LINC00494	144	-16.57	144	-16.57	2305	23	2630	192
hsa-miR-2682-5p	ENSG00000235621	ENST00000425021.2	LINC00494	144	-16.57	144	-16.57	2306	23	638	169
hsa-miR-2682-5p	ENSG00000235621	ENST00000692154.1	LINC00494	144	-16.57	144	-16.57	2307	23	2310	169
hsa-miR-2682-5p	ENSG00000235621	ENST00000416742.5	LINC00494	144	-16.57	144	-16.57	2308	23	3544	167
hsa-miR-2682-5p	ENSG00000277067	ENST00000782238.1	CU634019.1	145	-16.74	145	-16.74	2325	23	2245	697
hsa-miR-2682-5p	ENSG00000277067	ENST00000782240.1	CU634019.1	154	-28.64	154	-28.64	2328	23	670	378
hsa-miR-2682-5p	ENSG00000232079	ENST00000423808.3	LINC01697	140	-26.23	140	-26.23	2364	23	951	187
hsa-miR-2682-5p	ENSG00000225431	ENST00000419628.2	LINC01671	155	-21.8	155	-21.8	2368	23	1811	159
hsa-miR-2682-5p	ENSG00000274225	ENST00000617205.2	AP001065.1	141	-24.01	141	-24.01	2369	23	1392	756
hsa-miR-2682-5p	ENSG00000249923	ENST00000824279.1	AC007663.2	151	-17.31	151	-17.31	2371	23	2023	1727
hsa-miR-2682-5p	ENSG00000226328	ENST00000426282.7	NUP50-AS1	153	-22.6	153	-22.6	2382	23	2095	669
hsa-miR-2682-5p	ENSG00000226328	ENST00000665704.1	NUP50-AS1	153	-22.6	153	-22.6	2383	23	2031	1286
hsa-miR-2682-5p	ENSG00000226328	ENST00000609284.3	NUP50-AS1	153	-22.6	153	-22.6	2384	23	1698	958
hsa-miR-2682-5p	ENSG00000226328	ENST00000816418.1	NUP50-AS1	153	-22.6	153	-22.6	2385	23	1479	786
hsa-miR-2682-5p	ENSG00000226328	ENST00000816422.1	NUP50-AS1	153	-22.6	153	-22.6	2386	23	847	687
hsa-miR-2682-5p	ENSG00000226328	ENST00000816419.1	NUP50-AS1	153	-22.6	153	-22.6	2387	23	797	637
hsa-miR-2682-5p	ENSG00000226328	ENST00000702308.2	NUP50-AS1	153	-22.6	153	-22.6	2388	23	803	646
hsa-miR-2682-5p	ENSG00000226328	ENST00000432502.1	NUP50-AS1	153	-22.6	153	-22.6	2389	23	596	440
hsa-miR-2682-5p	ENSG00000226328	ENST00000816429.1	NUP50-AS1	153	-22.6	153	-22.6	2390	23	700	544
hsa-miR-2682-5p	ENSG00000226328	ENST00000816427.1	NUP50-AS1	153	-22.6	153	-22.6	2391	23	902	746
hsa-miR-2682-5p	ENSG00000226328	ENST00000816428.1	NUP50-AS1	153	-22.6	153	-22.6	2392	23	712	556
hsa-miR-2682-5p	ENSG00000226328	ENST00000816426.1	NUP50-AS1	153	-22.6	153	-22.6	2393	23	926	770
hsa-miR-2682-5p	ENSG00000226328	ENST00000816425.1	NUP50-AS1	153	-22.6	153	-22.6	2394	23	959	803
hsa-miR-2682-5p	ENSG00000226328	ENST00000816424.1	NUP50-AS1	153	-22.6	153	-22.6	2395	23	1005	849
hsa-miR-2682-5p	ENSG00000226328	ENST00000816423.1	NUP50-AS1	153	-22.6	153	-22.6	2396	23	653	497
hsa-miR-2682-5p	ENSG00000226328	ENST00000816421.1	NUP50-AS1	153	-22.6	153	-22.6	2397	23	1031	875
hsa-miR-2682-5p	ENSG00000226328	ENST00000816420.1	NUP50-AS1	153	-22.6	153	-22.6	2398	23	923	767
hsa-miR-2682-5p	ENSG00000236393	ENST00000738318.1	AC091806.1	141	-20.02	141	-20.02	2403	23	1912	121
hsa-miR-2682-5p	ENSG00000284377	ENST00000741835.1	AL589669.1	142	-10.83	142	-10.83	2413	23	1404	788
hsa-miR-2682-5p	ENSG00000284377	ENST00000639829.1	AL589669.1	142	-10.83	142	-10.83	2414	23	1506	891
hsa-miR-887-5p	ENSG00000284708	ENST00000642131.1	AL031731.1	143	-13.53	143	-13.53	2437	21	2094	156
hsa-miR-887-5p	ENSG00000224259	ENST00000772305.1	LINC01133	299	-43.54	153	-24.03	2438	21	325	87	167
hsa-miR-887-5p	ENSG00000224259	ENST00000772302.1	LINC01133	299	-43.54	153	-24.03	2439	21	564	68	148
hsa-miR-887-5p	ENSG00000224259	ENST00000772303.1	LINC01133	440	-63.08	153	-24.03	2440	21	522	63	143	450
hsa-miR-887-5p	ENSG00000224259	ENST00000772309.1	LINC01133	299	-43.54	153	-24.03	2441	21	471	233	313
hsa-miR-887-5p	ENSG00000224259	ENST00000772301.1	LINC01133	299	-43.54	153	-24.03	2442	21	737	198	278
hsa-miR-887-5p	ENSG00000224259	ENST00000772304.1	LINC01133	299	-43.54	153	-24.03	2443	21	1354	41	121
hsa-miR-887-5p	ENSG00000224259	ENST00000772308.1	LINC01133	145	-14.33	145	-14.33	2447	21	527	353
hsa-miR-887-5p	ENSG00000204792	ENST00000717897.1	LINC01291	141	-15.58	141	-15.58	2482	21	5575	17
hsa-miR-887-5p	ENSG00000204792	ENST00000377469.1	LINC01291	144	-17.78	144	-17.78	2484	21	3662	2567
hsa-miR-887-5p	ENSG00000228791	ENST00000608893.6	THRB-AS1	142	-15.11	142	-15.11	2519	21	1416	448
hsa-miR-887-5p	ENSG00000228791	ENST00000594183.1	THRB-AS1	143	-21.11	143	-21.11	2523	21	837	72
hsa-miR-887-5p	ENSG00000228791	ENST00000630391.1	THRB-AS1	147	-22.38	147	-22.38	2524	21	1992	477
hsa-miR-887-5p	ENSG00000273033	ENST00000610128.2	LINC02035	288	-35.63	146	-21.29	2530	21	5476	4820	420
hsa-miR-887-5p	ENSG00000273033	ENST00000809469.1	LINC02035	146	-21.29	146	-21.29	2531	21	1302	639
hsa-miR-887-5p	ENSG00000243550	ENST00000749930.1	LINC01214	143	-19.86	143	-19.86	2557	21	455	6
hsa-miR-887-5p	ENSG00000243550	ENST00000749929.1	LINC01214	143	-19.86	143	-19.86	2558	21	610	34
hsa-miR-887-5p	ENSG00000243550	ENST00000749928.1	LINC01214	143	-19.86	143	-19.86	2559	21	846	52
hsa-miR-887-5p	ENSG00000243550	ENST00000749927.1	LINC01214	143	-19.86	143	-19.86	2560	21	586	62
hsa-miR-887-5p	ENSG00000243550	ENST00000692847.3	LINC01214	140	-13.29	140	-13.29	2576	21	2194	1260
hsa-miR-887-5p	ENSG00000243550	ENST00000749936.1	LINC01214	143	-19.86	143	-19.86	2582	21	561	88
hsa-miR-887-5p	ENSG00000260918	ENST00000562284.1	AC107398.3	141	-12.93	141	-12.93	2588	21	7000	2262
hsa-miR-887-5p	ENSG00000251442	ENST00000778506.1	LINC01094	147	-12.34	147	-12.34	2589	21	1536	307
hsa-miR-887-5p	ENSG00000251442	ENST00000668669.1	LINC01094	147	-12.34	147	-12.34	2590	21	2476	357
hsa-miR-887-5p	ENSG00000251442	ENST00000778520.1	LINC01094	147	-12.34	147	-12.34	2591	21	1094	523
hsa-miR-887-5p	ENSG00000251442	ENST00000671622.2	LINC01094	147	-12.34	147	-12.34	2592	21	2989	379
hsa-miR-887-5p	ENSG00000251442	ENST00000778503.1	LINC01094	147	-12.34	147	-12.34	2593	21	1691	337
hsa-miR-887-5p	ENSG00000251442	ENST00000503259.6	LINC01094	147	-12.34	147	-12.34	2594	21	2560	318
hsa-miR-887-5p	ENSG00000251442	ENST00000656991.2	LINC01094	147	-12.34	147	-12.34	2595	21	2393	302
hsa-miR-887-5p	ENSG00000251442	ENST00000503539.8	LINC01094	147	-12.34	147	-12.34	2596	21	2509	302
hsa-miR-887-5p	ENSG00000251442	ENST00000507802.6	LINC01094	147	-12.34	147	-12.34	2597	21	2485	263
hsa-miR-887-5p	ENSG00000251442	ENST00000778522.1	LINC01094	147	-12.34	147	-12.34	2598	21	726	255
hsa-miR-887-5p	ENSG00000251442	ENST00000687467.2	LINC01094	147	-12.34	147	-12.34	2599	21	2119	244
hsa-miR-887-5p	ENSG00000251442	ENST00000778504.1	LINC01094	147	-12.34	147	-12.34	2600	21	854	224
hsa-miR-887-5p	ENSG00000251442	ENST00000504675.7	LINC01094	147	-12.34	147	-12.34	2601	21	2336	197
hsa-miR-887-5p	ENSG00000251442	ENST00000701241.1	LINC01094	292	-31	147	-18.66	2602	21	1831	194	314
hsa-miR-887-5p	ENSG00000251442	ENST00000663250.2	LINC01094	147	-12.34	147	-12.34	2603	21	2383	194
hsa-miR-887-5p	ENSG00000251442	ENST00000778513.1	LINC01094	147	-12.34	147	-12.34	2604	21	1128	186
hsa-miR-887-5p	ENSG00000251442	ENST00000701906.2	LINC01094	147	-12.34	147	-12.34	2605	21	1300	186
hsa-miR-887-5p	ENSG00000251442	ENST00000670146.2	LINC01094	147	-12.34	147	-12.34	2606	21	1967	186
hsa-miR-887-5p	ENSG00000251442	ENST00000514130.6	LINC01094	292	-31	147	-18.66	2607	21	2095	99	219
hsa-miR-887-5p	ENSG00000251442	ENST00000778512.1	LINC01094	147	-12.34	147	-12.34	2608	21	1490	36
hsa-miR-887-5p	ENSG00000251442	ENST00000512322.2	LINC01094	292	-31	147	-18.66	2609	21	2225	34	154
hsa-miR-887-5p	ENSG00000251442	ENST00000654343.1	LINC01094	147	-12.34	147	-12.34	2610	21	1680	16
hsa-miR-887-5p	ENSG00000251442	ENST00000654792.1	LINC01094	292	-31	147	-18.66	2611	21	1778	16	136
hsa-miR-887-5p	ENSG00000251442	ENST00000652918.1	LINC01094	147	-12.34	147	-12.34	2612	21	2207	1
hsa-miR-887-5p	ENSG00000251442	ENST00000778523.1	LINC01094	147	-12.22	147	-12.22	2613	21	2647	1
hsa-miR-887-5p	ENSG00000251442	ENST00000667455.1	LINC01094	287	-29.21	145	-18.66	2614	21	2266	111	1
hsa-miR-887-5p	ENSG00000251442	ENST00000653916.2	LINC01094	142	-10.55	142	-10.55	2615	21	1180	1
hsa-miR-887-5p	ENSG00000251442	ENST00000778505.1	LINC01094	143	-13.53	143	-13.53	2617	21	1070	374
hsa-miR-887-5p	ENSG00000251442	ENST00000778515.1	LINC01094	143	-13.53	143	-13.53	2625	21	968	272
hsa-miR-887-5p	ENSG00000251442	ENST00000778514.1	LINC01094	286	-27.01	143	-13.53	2626	21	1151	128	447
hsa-miR-887-5p	ENSG00000251442	ENST00000778516.1	LINC01094	143	-13.53	143	-13.53	2627	21	1033	337
hsa-miR-887-5p	ENSG00000251442	ENST00000778518.1	LINC01094	143	-13.53	143	-13.53	2630	21	611	451
hsa-miR-887-5p	ENSG00000251442	ENST00000778517.1	LINC01094	143	-13.53	143	-13.53	2631	21	1030	334
hsa-miR-887-5p	ENSG00000284968	ENST00000508280.6	AC093827.4	154	-25.38	154	-25.38	2632	21	2158	1844
hsa-miR-887-5p	ENSG00000261211	ENST00000563225.2	AL031123.2	147	-13.82	147	-13.82	2650	21	6640	4091
hsa-miR-887-5p	ENSG00000285216	ENST00000644718.1	AL355499.2	153	-21.16	153	-21.16	2654	21	866	815
hsa-miR-887-5p	ENSG00000230943	ENST00000788889.1	LINC02541	147	-15.1	147	-15.1	2684	21	1451	1145
hsa-miR-887-5p	ENSG00000230943	ENST00000788910.1	LINC02541	147	-15.1	147	-15.1	2685	21	1600	1295
hsa-miR-887-5p	ENSG00000230943	ENST00000788883.1	LINC02541	147	-15.1	147	-15.1	2686	21	1417	1112
hsa-miR-887-5p	ENSG00000230943	ENST00000788912.1	LINC02541	147	-15.1	147	-15.1	2687	21	1646	1342
hsa-miR-887-5p	ENSG00000230943	ENST00000788911.1	LINC02541	147	-15.1	147	-15.1	2688	21	1480	1176
hsa-miR-887-5p	ENSG00000230943	ENST00000788915.1	LINC02541	147	-15.1	147	-15.1	2689	21	1497	1194
hsa-miR-887-5p	ENSG00000230943	ENST00000788913.1	LINC02541	147	-15.1	147	-15.1	2690	21	1590	1287
hsa-miR-887-5p	ENSG00000230943	ENST00000654213.2	LINC02541	147	-15.1	147	-15.1	2691	21	1707	1404
hsa-miR-887-5p	ENSG00000230943	ENST00000788903.1	LINC02541	147	-15.1	147	-15.1	2692	21	1474	1171
hsa-miR-887-5p	ENSG00000230943	ENST00000788902.1	LINC02541	147	-15.1	147	-15.1	2693	21	1610	1307
hsa-miR-887-5p	ENSG00000230943	ENST00000788900.1	LINC02541	147	-15.1	147	-15.1	2694	21	1483	1180
hsa-miR-887-5p	ENSG00000230943	ENST00000788899.1	LINC02541	147	-15.1	147	-15.1	2695	21	1627	1324
hsa-miR-887-5p	ENSG00000230943	ENST00000788898.1	LINC02541	147	-15.1	147	-15.1	2696	21	1665	1362
hsa-miR-887-5p	ENSG00000230943	ENST00000788886.1	LINC02541	147	-15.1	147	-15.1	2697	21	1208	905
hsa-miR-887-5p	ENSG00000230943	ENST00000788885.1	LINC02541	147	-15.1	147	-15.1	2698	21	1504	1201
hsa-miR-887-5p	ENSG00000230943	ENST00000788901.1	LINC02541	147	-15.1	147	-15.1	2699	21	1534	1234
hsa-miR-887-5p	ENSG00000230943	ENST00000788887.1	LINC02541	147	-15.1	147	-15.1	2700	21	1438	1138
hsa-miR-887-5p	ENSG00000230943	ENST00000788884.1	LINC02541	147	-15.1	147	-15.1	2701	21	1429	1129
hsa-miR-887-5p	ENSG00000230943	ENST00000649523.1	LINC02541	147	-15.1	147	-15.1	2702	21	1879	1603
hsa-miR-887-5p	ENSG00000230943	ENST00000788888.1	LINC02541	147	-15.1	147	-15.1	2703	21	1264	1158
hsa-miR-887-5p	ENSG00000230943	ENST00000788897.1	LINC02541	147	-15.1	147	-15.1	2704	21	1286	1183
hsa-miR-887-5p	ENSG00000285427	ENST00000535372.1	SOD2-OT1	141	-18.88	141	-18.88	2724	21	1718	1344
hsa-miR-887-5p	ENSG00000237070	ENST00000451240.1	AC005550.2	140	-10.55	140	-10.55	2726	21	3743	3267
hsa-miR-887-5p	ENSG00000236039	ENST00000636929.1	AC019117.1	153	-17.99	153	-17.99	2727	21	1462	1369
hsa-miR-887-5p	ENSG00000122548	ENST00000242109.6	KIAA0087	293	-23.68	147	-13.82	2752	21	4354	3092	1581
hsa-miR-887-5p	ENSG00000233760	ENST00000780912.1	AC004947.1	151	-20.28	151	-20.28	2754	21	1773	501
hsa-miR-887-5p	ENSG00000271553	ENST00000605836.1	AC018638.7	285	-27.42	145	-16.87	2765	21	1114	1	720
hsa-miR-887-5p	ENSG00000254109	ENST00000792123.1	RBPMS-AS1	147	-15.63	147	-15.63	2769	21	1293	139
hsa-miR-887-5p	ENSG00000254109	ENST00000523643.6	RBPMS-AS1	147	-15.63	147	-15.63	2770	21	1372	228
hsa-miR-887-5p	ENSG00000254109	ENST00000792128.1	RBPMS-AS1	147	-15.63	147	-15.63	2771	21	1005	302
hsa-miR-887-5p	ENSG00000254109	ENST00000792127.1	RBPMS-AS1	147	-15.63	147	-15.63	2773	21	1015	437
hsa-miR-887-5p	ENSG00000254109	ENST00000792129.1	RBPMS-AS1	147	-15.63	147	-15.63	2775	21	723	147
hsa-miR-887-5p	ENSG00000254109	ENST00000792126.1	RBPMS-AS1	147	-15.63	147	-15.63	2776	21	816	240
hsa-miR-887-5p	ENSG00000254109	ENST00000792125.1	RBPMS-AS1	147	-15.63	147	-15.63	2777	21	715	139
hsa-miR-887-5p	ENSG00000254109	ENST00000519753.2	RBPMS-AS1	147	-15.63	147	-15.63	2779	21	1036	366
hsa-miR-887-5p	ENSG00000254109	ENST00000792133.1	RBPMS-AS1	147	-15.63	147	-15.63	2781	21	1029	364
hsa-miR-887-5p	ENSG00000254109	ENST00000792132.1	RBPMS-AS1	147	-15.63	147	-15.63	2782	21	951	286
hsa-miR-887-5p	ENSG00000254109	ENST00000662163.1	RBPMS-AS1	147	-15.63	147	-15.63	2783	21	767	282
hsa-miR-887-5p	ENSG00000272159	ENST00000606593.1	AC087623.4	150	-21.91	150	-21.91	2784	21	695	41
hsa-miR-887-5p	ENSG00000227121	ENST00000765539.1	AC073174.1	290	-32.66	146	-19.42	2799	21	1078	393	742
hsa-miR-887-5p	ENSG00000227121	ENST00000765540.1	AC073174.1	290	-32.66	146	-19.42	2800	21	1091	408	757
hsa-miR-887-5p	ENSG00000242288	ENST00000399449.3	AC022400.3	148	-15.42	148	-15.42	2801	21	3810	1158
hsa-miR-887-5p	ENSG00000237523	ENST00000819793.1	LINC00857	147	-14.64	147	-14.64	2806	21	1167	1075
hsa-miR-887-5p	ENSG00000237523	ENST00000819800.1	LINC00857	143	-13.53	143	-13.53	2807	21	1377	1044
hsa-miR-887-5p	ENSG00000237523	ENST00000819794.1	LINC00857	147	-14.64	147	-14.64	2810	21	1166	1074
hsa-miR-887-5p	ENSG00000269609	ENST00000494270.7	RPARP-AS1	145	-21.45	145	-21.45	2822	21	2068	573
hsa-miR-887-5p	ENSG00000269609	ENST00000594818.1	RPARP-AS1	146	-11	146	-11	2832	21	445	399
hsa-miR-887-5p	ENSG00000269609	ENST00000659211.1	RPARP-AS1	145	-21.45	145	-21.45	2835	21	2313	818
hsa-miR-887-5p	ENSG00000269609	ENST00000597488.1	RPARP-AS1	580	-71.08	147	-21.45	2837	21	1938	1006	20	871	979
hsa-miR-887-5p	ENSG00000269609	ENST00000598368.2	RPARP-AS1	292	-33.01	147	-19.19	2838	21	2458	274	142
hsa-miR-887-5p	ENSG00000255367	ENST00000659225.2	AC127526.2	150	-15.33	150	-15.33	2901	21	1247	1157
hsa-miR-887-5p	ENSG00000255367	ENST00000717881.1	AC127526.2	143	-13.53	143	-13.53	2912	21	2910	903
hsa-miR-887-5p	ENSG00000255367	ENST00000822354.1	AC127526.2	148	-25.82	148	-25.82	2915	21	1060	904
hsa-miR-887-5p	ENSG00000255367	ENST00000717888.1	AC127526.2	142	-16.49	142	-16.49	2923	21	596	363
hsa-miR-887-5p	ENSG00000255367	ENST00000717891.1	AC127526.2	290	-31.92	148	-16.49	2926	21	699	546	390
hsa-miR-887-5p	ENSG00000255367	ENST00000717893.1	AC127526.2	140	-24.53	140	-24.53	2929	21	1047	925
hsa-miR-887-5p	ENSG00000255478	ENST00000533886.1	AP000944.1	143	-13.53	143	-13.53	2936	21	564	174
hsa-miR-887-5p	ENSG00000257660	ENST00000803322.1	AC117498.2	150	-16.87	150	-16.87	2976	21	541	387
hsa-miR-887-5p	ENSG00000241388	ENST00000647473.1	HNF1A-AS1	147	-13.82	147	-13.82	2985	21	1144	804
hsa-miR-887-5p	ENSG00000259230	ENST00000716868.1	LINC02323	140	-23.57	140	-23.57	3035	21	1764	1056
hsa-miR-887-5p	ENSG00000259230	ENST00000716869.1	LINC02323	149	-25.14	149	-25.14	3036	21	1009	910
hsa-miR-887-5p	ENSG00000259230	ENST00000559946.1	LINC02323	140	-23.57	140	-23.57	3037	21	1603	895
hsa-miR-887-5p	ENSG00000259230	ENST00000701178.1	LINC02323	149	-25.14	149	-25.14	3038	21	479	385
hsa-miR-887-5p	ENSG00000259230	ENST00000716870.1	LINC02323	149	-25.14	149	-25.14	3039	21	1370	1271
hsa-miR-887-5p	ENSG00000259230	ENST00000766587.1	LINC02323	149	-25.14	149	-25.14	3040	21	594	495
hsa-miR-887-5p	ENSG00000259230	ENST00000766588.1	LINC02323	149	-25.14	149	-25.14	3041	21	1118	1005
hsa-miR-887-5p	ENSG00000259230	ENST00000766589.1	LINC02323	149	-25.14	149	-25.14	3042	21	787	688
hsa-miR-887-5p	ENSG00000259230	ENST00000766590.1	LINC02323	149	-25.14	149	-25.14	3043	21	892	807
hsa-miR-887-5p	ENSG00000259230	ENST00000766591.1	LINC02323	149	-25.14	149	-25.14	3044	21	641	542
hsa-miR-887-5p	ENSG00000259230	ENST00000766592.1	LINC02323	149	-25.14	149	-25.14	3045	21	1029	930
hsa-miR-887-5p	ENSG00000259230	ENST00000766593.1	LINC02323	149	-25.14	149	-25.14	3046	21	863	764
hsa-miR-887-5p	ENSG00000259230	ENST00000766594.1	LINC02323	149	-25.14	149	-25.14	3047	21	574	475
hsa-miR-887-5p	ENSG00000259230	ENST00000766595.1	LINC02323	149	-25.14	149	-25.14	3048	21	576	477
hsa-miR-887-5p	ENSG00000259230	ENST00000766596.1	LINC02323	149	-25.14	149	-25.14	3049	21	541	428
hsa-miR-887-5p	ENSG00000259230	ENST00000766597.1	LINC02323	149	-25.14	149	-25.14	3050	21	538	425
hsa-miR-887-5p	ENSG00000259230	ENST00000766598.1	LINC02323	149	-25.14	149	-25.14	3051	21	839	726
hsa-miR-887-5p	ENSG00000259230	ENST00000766599.1	LINC02323	149	-25.14	149	-25.14	3052	21	1036	937
hsa-miR-887-5p	ENSG00000259230	ENST00000766600.1	LINC02323	149	-25.14	149	-25.14	3053	21	920	821
hsa-miR-887-5p	ENSG00000259230	ENST00000766601.1	LINC02323	149	-25.14	149	-25.14	3054	21	461	348
hsa-miR-887-5p	ENSG00000251533	ENST00000805819.1	LINC00605	442	-47.81	152	-18.57	3055	21	1387	1124	389	1302
hsa-miR-887-5p	ENSG00000251533	ENST00000805824.1	LINC00605	442	-47.81	152	-18.57	3056	21	788	528	322	706
hsa-miR-887-5p	ENSG00000251533	ENST00000805820.1	LINC00605	442	-47.81	152	-18.57	3057	21	1017	758	389	936
hsa-miR-887-5p	ENSG00000251533	ENST00000514902.3	LINC00605	442	-47.81	152	-18.57	3058	21	1559	1301	566	1479
hsa-miR-887-5p	ENSG00000251533	ENST00000805829.1	LINC00605	442	-47.81	152	-18.57	3059	21	1722	1464	729	1642
hsa-miR-887-5p	ENSG00000251533	ENST00000805828.1	LINC00605	442	-47.81	152	-18.57	3060	21	695	437	231	615
hsa-miR-887-5p	ENSG00000251533	ENST00000805827.1	LINC00605	442	-47.81	152	-18.57	3061	21	1124	866	131	1044
hsa-miR-887-5p	ENSG00000251533	ENST00000805825.1	LINC00605	442	-47.81	152	-18.57	3062	21	1582	1324	589	1502
hsa-miR-887-5p	ENSG00000251533	ENST00000805823.1	LINC00605	442	-47.81	152	-18.57	3063	21	1392	1134	399	1312
hsa-miR-887-5p	ENSG00000251533	ENST00000805821.1	LINC00605	442	-47.81	152	-18.57	3064	21	1054	796	427	974
hsa-miR-887-5p	ENSG00000251533	ENST00000805822.1	LINC00605	442	-47.81	152	-18.57	3065	21	891	633	427	811
hsa-miR-887-5p	ENSG00000251533	ENST00000805818.1	LINC00605	442	-47.81	152	-18.57	3066	21	1085	827	458	1005
hsa-miR-887-5p	ENSG00000251533	ENST00000805817.1	LINC00605	442	-47.81	152	-18.57	3067	21	1344	1086	351	1264
hsa-miR-887-5p	ENSG00000251533	ENST00000805816.1	LINC00605	442	-47.81	152	-18.57	3068	21	1738	1480	1111	1658
hsa-miR-887-5p	ENSG00000251533	ENST00000805826.1	LINC00605	442	-47.81	152	-18.57	3069	21	1267	1012	277	1190
hsa-miR-887-5p	ENSG00000262823	ENST00000576086.2	AC127521.1	142	-25.35	142	-25.35	3086	21	1053	162
hsa-miR-887-5p	ENSG00000236377	ENST00000435733.2	AC084809.2	143	-13.53	143	-13.53	3091	21	3024	2372
hsa-miR-887-5p	ENSG00000264769	ENST00000580897.1	AC145207.8	149	-22.31	149	-22.31	3095	21	563	364
hsa-miR-887-5p	ENSG00000266968	ENST00000590535.2	AC023421.1	159	-20.79	159	-20.79	3096	21	1785	257
hsa-miR-887-5p	ENSG00000235621	ENST00000660785.1	LINC00494	146	-24.61	146	-24.61	3117	21	2630	2191
hsa-miR-887-5p	ENSG00000235621	ENST00000692154.1	LINC00494	146	-24.61	146	-24.61	3119	21	2310	1859
hsa-miR-887-5p	ENSG00000235621	ENST00000416742.5	LINC00494	146	-24.61	146	-24.61	3120	21	3544	2490
hsa-miR-887-5p	ENSG00000235621	ENST00000655482.1	LINC00494	146	-24.61	146	-24.61	3122	21	3418	2357
hsa-miR-887-5p	ENSG00000235621	ENST00000545181.5	LINC00494	146	-24.61	146	-24.61	3123	21	3343	2289
hsa-miR-887-5p	ENSG00000235621	ENST00000433094.1	LINC00494	146	-24.61	146	-24.61	3124	21	3071	2017
hsa-miR-887-5p	ENSG00000277067	ENST00000623394.4	CU634019.1	153	-14.18	153	-14.18	3129	21	1492	262
hsa-miR-887-5p	ENSG00000277067	ENST00000782209.1	CU634019.1	140	-10.55	140	-10.55	3135	21	1161	842
hsa-miR-887-5p	ENSG00000277067	ENST00000782230.1	CU634019.1	153	-14.18	153	-14.18	3141	21	1787	284
hsa-miR-887-5p	ENSG00000277067	ENST00000782226.1	CU634019.1	153	-14.18	153	-14.18	3151	21	1964	208
hsa-miR-887-5p	ENSG00000277067	ENST00000782224.1	CU634019.1	153	-14.18	153	-14.18	3152	21	2314	208
hsa-miR-887-5p	ENSG00000277067	ENST00000782216.1	CU634019.1	153	-14.18	153	-14.18	3153	21	2392	202
hsa-miR-887-5p	ENSG00000277067	ENST00000622911.1	CU634019.1	153	-14.18	153	-14.18	3156	21	572	194
hsa-miR-887-5p	ENSG00000277067	ENST00000782236.1	CU634019.1	153	-14.18	153	-14.18	3157	21	1342	192
hsa-miR-887-5p	ENSG00000277067	ENST00000782239.1	CU634019.1	153	-14.18	153	-14.18	3162	21	725	174
hsa-miR-887-5p	ENSG00000232079	ENST00000426534.2	LINC01697	140	-11.02	140	-11.02	3171	21	1764	367
hsa-miR-887-5p	ENSG00000232079	ENST00000609782.1	LINC01697	281	-25.47	141	-14.45	3179	21	763	366	424
hsa-miR-887-5p	ENSG00000249923	ENST00000506039.2	AC007663.2	427	-53.41	144	-20.61	3182	21	2513	2110	935	2479
hsa-miR-887-5p	ENSG00000249923	ENST00000824281.1	AC007663.2	147	-19.31	147	-19.31	3187	21	458	6
hsa-miR-887-5p	ENSG00000249923	ENST00000824277.1	AC007663.2	149	-16.99	149	-16.99	3191	21	2255	1541
hsa-miR-887-5p	ENSG00000249923	ENST00000824276.1	AC007663.2	149	-16.99	149	-16.99	3192	21	1627	915
hsa-miR-887-5p	ENSG00000226328	ENST00000426282.7	NUP50-AS1	295	-34.64	152	-21.11	3194	21	2095	280	1635
hsa-miR-887-5p	ENSG00000226328	ENST00000665704.1	NUP50-AS1	439	-47.08	152	-21.11	3195	21	2031	897	425	164
hsa-miR-887-5p	ENSG00000226328	ENST00000609284.3	NUP50-AS1	152	-21.11	152	-21.11	3196	21	1698	569
hsa-miR-887-5p	ENSG00000226328	ENST00000816418.1	NUP50-AS1	152	-21.11	152	-21.11	3197	21	1479	397
hsa-miR-887-5p	ENSG00000226328	ENST00000816422.1	NUP50-AS1	152	-21.11	152	-21.11	3198	21	847	298
hsa-miR-887-5p	ENSG00000226328	ENST00000816419.1	NUP50-AS1	152	-21.11	152	-21.11	3199	21	797	248
hsa-miR-887-5p	ENSG00000226328	ENST00000816427.1	NUP50-AS1	152	-21.11	152	-21.11	3203	21	902	357
hsa-miR-887-5p	ENSG00000226328	ENST00000816428.1	NUP50-AS1	152	-21.11	152	-21.11	3204	21	712	167
hsa-miR-887-5p	ENSG00000226328	ENST00000816426.1	NUP50-AS1	152	-21.11	152	-21.11	3205	21	926	381
hsa-miR-887-5p	ENSG00000226328	ENST00000816425.1	NUP50-AS1	152	-21.11	152	-21.11	3206	21	959	414
hsa-miR-887-5p	ENSG00000226328	ENST00000816424.1	NUP50-AS1	152	-21.11	152	-21.11	3207	21	1005	460
hsa-miR-887-5p	ENSG00000226328	ENST00000816421.1	NUP50-AS1	152	-21.11	152	-21.11	3209	21	1031	486
hsa-miR-887-5p	ENSG00000226328	ENST00000816420.1	NUP50-AS1	152	-21.11	152	-21.11	3210	21	923	378
hsa-miR-887-5p	ENSG00000236393	ENST00000738318.1	AC091806.1	291	-48.21	150	-26.19	3215	21	1912	623	163
hsa-miR-887-5p	ENSG00000236393	ENST00000452690.1	AC091806.1	299	-40.43	150	-26.19	3216	21	3000	246	2577
hsa-miR-887-5p	ENSG00000236393	ENST00000447570.2	AC091806.1	295	-46.75	150	-26.19	3217	21	1959	197	1662
hsa-miR-887-5p	ENSG00000236393	ENST00000653973.1	AC091806.1	150	-26.19	150	-26.19	3218	21	724	154
hsa-miR-887-5p	ENSG00000236393	ENST00000738323.1	AC091806.1	140	-10.55	140	-10.55	3220	21	655	555
hsa-miR-887-5p	ENSG00000236393	ENST00000738324.1	AC091806.1	140	-10.55	140	-10.55	3222	21	399	299
hsa-miR-887-5p	ENSG00000231535	ENST00000665487.1	LINC00278	142	-10.69	142	-10.69	3233	21	1341	547
hsa-miR-887-5p	ENSG00000231535	ENST00000652068.1	LINC00278	141	-12.95	141	-12.95	3236	21	890	517
hsa-miR-887-5p	ENSG00000231535	ENST00000651090.1	LINC00278	142	-10.69	142	-10.69	3237	21	1582	788
hsa-miR-887-5p	ENSG00000231535	ENST00000425031.2	LINC00278	141	-12.95	141	-12.95	3243	21	620	505
hsa-miR-887-5p	ENSG00000231535	ENST00000803191.1	LINC00278	141	-12.95	141	-12.95	3246	21	939	569
hsa-miR-887-5p	ENSG00000231535	ENST00000653660.1	LINC00278	141	-12.95	141	-12.95	3247	21	1015	480
hsa-miR-491-3p	ENSG00000204792	ENST00000717897.1	LINC01291	144	-12.77	144	-12.77	3294	22	5575	2571
hsa-miR-491-3p	ENSG00000204792	ENST00000435984.2	LINC01291	144	-12.77	144	-12.77	3295	22	5588	2584
hsa-miR-491-3p	ENSG00000273033	ENST00000610128.2	LINC02035	301	-22.75	153	-16.07	3342	22	5476	1007	1139
hsa-miR-491-3p	ENSG00000260918	ENST00000562284.1	AC107398.3	292	-15.07	151	-8.35	3400	22	7000	3856	3753
hsa-miR-491-3p	ENSG00000251442	ENST00000671622.2	LINC01094	301	-17.58	156	-10.7	3404	22	2989	2558	2903
hsa-miR-491-3p	ENSG00000251442	ENST00000663250.2	LINC01094	301	-17.58	156	-10.7	3415	22	2383	1952	2297
hsa-miR-491-3p	ENSG00000251442	ENST00000778505.1	LINC01094	146	-10.25	146	-10.25	3429	22	1070	860
hsa-miR-491-3p	ENSG00000251442	ENST00000778515.1	LINC01094	146	-10.25	146	-10.25	3437	22	968	758
hsa-miR-491-3p	ENSG00000251442	ENST00000778514.1	LINC01094	146	-10.25	146	-10.25	3438	22	1151	933
hsa-miR-491-3p	ENSG00000251442	ENST00000778516.1	LINC01094	146	-10.25	146	-10.25	3439	22	1033	823
hsa-miR-491-3p	ENSG00000251442	ENST00000778517.1	LINC01094	146	-10.25	146	-10.25	3443	22	1030	820
hsa-miR-491-3p	ENSG00000284968	ENST00000508280.6	AC093827.4	293	-25.41	153	-13.88	3444	22	2158	80	308
hsa-miR-491-3p	ENSG00000284968	ENST00000506484.1	AC093827.4	293	-25.41	153	-13.88	3445	22	898	57	285
hsa-miR-491-3p	ENSG00000284968	ENST00000509262.1	AC093827.4	140	-11.53	140	-11.53	3446	22	434	149
hsa-miR-491-3p	ENSG00000284968	ENST00000503159.1	AC093827.4	153	-13.88	153	-13.88	3447	22	572	80
hsa-miR-491-3p	ENSG00000232316	ENST00000835254.1	LINC02518	306	-18.7	158	-9.71	3495	22	1115	528	709
hsa-miR-491-3p	ENSG00000285427	ENST00000535372.1	SOD2-OT1	163	-16	163	-16	3536	22	1718	972
hsa-miR-491-3p	ENSG00000122548	ENST00000242109.6	KIAA0087	144	-8.21	144	-8.21	3564	22	4354	1202
hsa-miR-491-3p	ENSG00000255367	ENST00000717886.1	AC127526.2	146	-7.4	146	-7.4	3733	22	734	401
hsa-miR-491-3p	ENSG00000254682	ENST00000529369.3	AP002387.2	143	-11.43	143	-11.43	3749	22	820	316
hsa-miR-491-3p	ENSG00000255970	ENST00000835137.1	LINC02421	151	-14.69	151	-14.69	3791	22	841	455
hsa-miR-491-3p	ENSG00000255970	ENST00000542219.1	LINC02421	151	-14.69	151	-14.69	3792	22	3135	1647
hsa-miR-491-3p	ENSG00000258548	ENST00000557359.6	LINC00645	151	-8.35	151	-8.35	3834	22	3495	607
hsa-miR-491-3p	ENSG00000258548	ENST00000663380.1	LINC00645	151	-8.35	151	-8.35	3835	22	3213	490
hsa-miR-491-3p	ENSG00000258548	ENST00000557399.1	LINC00645	151	-8.35	151	-8.35	3836	22	3512	624
hsa-miR-491-3p	ENSG00000258548	ENST00000669384.1	LINC00645	151	-8.35	151	-8.35	3837	22	3394	608
hsa-miR-491-3p	ENSG00000258548	ENST00000662633.1	LINC00645	151	-8.35	151	-8.35	3838	22	821	560
hsa-miR-491-3p	ENSG00000236377	ENST00000435733.2	AC084809.2	144	-20.06	144	-20.06	3903	22	3024	1967
hsa-miR-491-3p	ENSG00000277837	ENST00000620778.1	AC090340.1	143	-5.87	143	-5.87	3909	22	4980	38
hsa-miR-491-3p	ENSG00000235621	ENST00000660785.1	LINC00494	140	-9.66	140	-9.66	3929	22	2630	2007
hsa-miR-491-3p	ENSG00000235621	ENST00000692154.1	LINC00494	140	-9.66	140	-9.66	3931	22	2310	1675
hsa-miR-491-3p	ENSG00000235621	ENST00000416742.5	LINC00494	140	-9.66	140	-9.66	3932	22	3544	2306
hsa-miR-491-3p	ENSG00000235621	ENST00000655482.1	LINC00494	140	-9.66	140	-9.66	3934	22	3418	2173
hsa-miR-491-3p	ENSG00000235621	ENST00000545181.5	LINC00494	140	-9.66	140	-9.66	3935	22	3343	2105
hsa-miR-491-3p	ENSG00000235621	ENST00000433094.1	LINC00494	140	-9.66	140	-9.66	3936	22	3071	1833
hsa-miR-491-3p	ENSG00000277067	ENST00000782240.1	CU634019.1	147	-9.12	147	-9.12	3952	22	670	603
hsa-miR-491-3p	ENSG00000232079	ENST00000616647.5	LINC01697	152	-20.16	152	-20.16	3990	22	610	229
hsa-miR-491-3p	ENSG00000249923	ENST00000824279.1	AC007663.2	145	-5.12	145	-5.12	3995	22	2023	899
hsa-miR-491-3p	ENSG00000284377	ENST00000741835.1	AL589669.1	152	-20.79	152	-20.79	4037	22	1404	1226
hsa-miR-491-3p	ENSG00000284377	ENST00000639829.1	AL589669.1	152	-20.79	152	-20.79	4038	22	1506	1329
hsa-miR-491-3p	ENSG00000284377	ENST00000701574.2	AL589669.1	152	-20.79	152	-20.79	4039	22	989	744
hsa-miR-491-3p	ENSG00000284377	ENST00000741836.1	AL589669.1	152	-20.79	152	-20.79	4041	22	1176	932
hsa-miR-491-3p	ENSG00000284377	ENST00000741837.1	AL589669.1	152	-20.79	152	-20.79	4042	22	905	663
hsa-miR-3938	ENSG00000260101	ENST00000561559.3	AC008074.3	283	-31.35	142	-18.83	4094	22	2599	2199	542
hsa-miR-3938	ENSG00000260101	ENST00000789328.1	AC008074.3	142	-12.52	142	-12.52	4095	22	2163	1763
hsa-miR-3938	ENSG00000260101	ENST00000789330.1	AC008074.3	141	-18.83	141	-18.83	4096	22	984	49
hsa-miR-3938	ENSG00000204792	ENST00000840152.1	LINC01291	147	-14.57	147	-14.57	4099	22	1538	775
hsa-miR-3938	ENSG00000204792	ENST00000840154.1	LINC01291	147	-14.57	147	-14.57	4101	22	1282	520
hsa-miR-3938	ENSG00000204792	ENST00000418204.2	LINC01291	147	-14.57	147	-14.57	4102	22	1619	859
hsa-miR-3938	ENSG00000204792	ENST00000840155.1	LINC01291	147	-14.57	147	-14.57	4103	22	1632	870
hsa-miR-3938	ENSG00000204792	ENST00000840153.1	LINC01291	147	-14.57	147	-14.57	4104	22	1575	812
hsa-miR-3938	ENSG00000204792	ENST00000840156.1	LINC01291	147	-14.57	147	-14.57	4105	22	1524	762
hsa-miR-3938	ENSG00000204792	ENST00000717897.1	LINC01291	440	-44.08	151	-16.27	4106	22	5575	1822	991	4532
hsa-miR-3938	ENSG00000204792	ENST00000435984.2	LINC01291	440	-44.08	151	-16.27	4107	22	5588	1835	1004	4545
hsa-miR-3938	ENSG00000204792	ENST00000453951.1	LINC01291	142	-13.24	142	-13.24	4109	22	1266	1047
hsa-miR-3938	ENSG00000228791	ENST00000608893.6	THRB-AS1	141	-12.65	141	-12.65	4143	22	1416	547
hsa-miR-3938	ENSG00000228791	ENST00000630391.1	THRB-AS1	142	-15.07	142	-15.07	4148	22	1992	1013
hsa-miR-3938	ENSG00000273033	ENST00000610128.2	LINC02035	286	-34.76	144	-19.84	4154	22	5476	3896	1312
hsa-miR-3938	ENSG00000260918	ENST00000562284.1	AC107398.3	293	-23.55	149	-12.86	4212	22	7000	4194	1130
hsa-miR-3938	ENSG00000251442	ENST00000668669.1	LINC01094	145	-11.77	145	-11.77	4214	22	2476	2090
hsa-miR-3938	ENSG00000251442	ENST00000671622.2	LINC01094	298	-27.97	153	-16.2	4216	22	2989	2602	2112
hsa-miR-3938	ENSG00000251442	ENST00000656991.2	LINC01094	145	-11.77	145	-11.77	4219	22	2393	2020
hsa-miR-3938	ENSG00000251442	ENST00000503539.8	LINC01094	145	-11.77	145	-11.77	4220	22	2509	2129
hsa-miR-3938	ENSG00000251442	ENST00000507802.6	LINC01094	145	-11.77	145	-11.77	4221	22	2485	2068
hsa-miR-3938	ENSG00000251442	ENST00000687467.2	LINC01094	145	-11.77	145	-11.77	4223	22	2119	1868
hsa-miR-3938	ENSG00000251442	ENST00000504675.7	LINC01094	145	-11.77	145	-11.77	4225	22	2336	2096
hsa-miR-3938	ENSG00000251442	ENST00000663250.2	LINC01094	298	-27.97	153	-16.2	4227	22	2383	1996	1506
hsa-miR-3938	ENSG00000251442	ENST00000670146.2	LINC01094	145	-11.77	145	-11.77	4230	22	1967	1592
hsa-miR-3938	ENSG00000251442	ENST00000778512.1	LINC01094	145	-11.77	145	-11.77	4232	22	1490	1239
hsa-miR-3938	ENSG00000251442	ENST00000512322.2	LINC01094	145	-11.77	145	-11.77	4233	22	2225	1850
hsa-miR-3938	ENSG00000251442	ENST00000654343.1	LINC01094	145	-11.77	145	-11.77	4234	22	1680	1313
hsa-miR-3938	ENSG00000251442	ENST00000654792.1	LINC01094	145	-11.77	145	-11.77	4235	22	1778	1411
hsa-miR-3938	ENSG00000251442	ENST00000652918.1	LINC01094	145	-11.77	145	-11.77	4236	22	2207	1790
hsa-miR-3938	ENSG00000251442	ENST00000667455.1	LINC01094	145	-11.77	145	-11.77	4238	22	2266	1901
hsa-miR-3938	ENSG00000271119	ENST00000605200.1	AC026412.3	143	-13.38	143	-13.38	4261	22	1661	146
hsa-miR-3938	ENSG00000261211	ENST00000563225.2	AL031123.2	157	-19.68	157	-19.68	4274	22	6640	618
hsa-miR-3938	ENSG00000232316	ENST00000835061.1	LINC02518	143	-17.61	143	-17.61	4295	22	707	356
hsa-miR-3938	ENSG00000232316	ENST00000835060.1	LINC02518	142	-17.61	142	-17.61	4296	22	587	235
hsa-miR-3938	ENSG00000232316	ENST00000835062.1	LINC02518	143	-17.61	143	-17.61	4297	22	775	568
hsa-miR-3938	ENSG00000232316	ENST00000835254.1	LINC02518	141	-15.51	141	-15.51	4307	22	1115	119
hsa-miR-3938	ENSG00000230943	ENST00000649523.1	LINC02541	146	-21.42	146	-21.42	4326	22	1879	263
hsa-miR-3938	ENSG00000230943	ENST00000701104.2	LINC02541	146	-21.42	146	-21.42	4334	22	780	301
hsa-miR-3938	ENSG00000230943	ENST00000788893.1	LINC02541	146	-21.42	146	-21.42	4343	22	774	300
hsa-miR-3938	ENSG00000230943	ENST00000788892.1	LINC02541	146	-21.42	146	-21.42	4344	22	882	408
hsa-miR-3938	ENSG00000230943	ENST00000788907.1	LINC02541	146	-21.42	146	-21.42	4346	22	989	170
hsa-miR-3938	ENSG00000122548	ENST00000242109.6	KIAA0087	145	-10.56	145	-10.56	4376	22	4354	1639
hsa-miR-3938	ENSG00000233760	ENST00000420912.2	AC004947.1	149	-12.73	149	-12.73	4380	22	2857	2031
hsa-miR-3938	ENSG00000233760	ENST00000653682.1	AC004947.1	149	-12.73	149	-12.73	4385	22	2669	1979
hsa-miR-3938	ENSG00000233760	ENST00000780913.1	AC004947.1	149	-12.73	149	-12.73	4388	22	871	125
hsa-miR-3938	ENSG00000271553	ENST00000605836.1	AC018638.7	146	-16.06	146	-16.06	4389	22	1114	512
hsa-miR-3938	ENSG00000272502	ENST00000605955.1	AC104958.2	155	-17.89	155	-17.89	4409	22	1141	449
hsa-miR-3938	ENSG00000269609	ENST00000755285.1	RPARP-AS1	159	-15.07	159	-15.07	4441	22	1240	1069
hsa-miR-3938	ENSG00000269609	ENST00000755282.1	RPARP-AS1	159	-15.07	159	-15.07	4442	22	1218	1039
hsa-miR-3938	ENSG00000269609	ENST00000755283.1	RPARP-AS1	159	-15.07	159	-15.07	4443	22	1244	1065
hsa-miR-3938	ENSG00000269609	ENST00000755284.1	RPARP-AS1	159	-15.07	159	-15.07	4444	22	1416	1237
hsa-miR-3938	ENSG00000269609	ENST00000473970.4	RPARP-AS1	159	-15.07	159	-15.07	4445	22	1313	1133
hsa-miR-3938	ENSG00000269609	ENST00000494270.7	RPARP-AS1	159	-15.07	159	-15.07	4446	22	2068	1921
hsa-miR-3938	ENSG00000269609	ENST00000663480.3	RPARP-AS1	159	-15.07	159	-15.07	4447	22	1549	1370
hsa-miR-3938	ENSG00000269609	ENST00000755287.1	RPARP-AS1	159	-15.07	159	-15.07	4448	22	1549	1374
hsa-miR-3938	ENSG00000269609	ENST00000657934.2	RPARP-AS1	159	-15.07	159	-15.07	4449	22	1455	1276
hsa-miR-3938	ENSG00000269609	ENST00000755288.1	RPARP-AS1	159	-15.07	159	-15.07	4450	22	1442	1267
hsa-miR-3938	ENSG00000269609	ENST00000755286.1	RPARP-AS1	159	-15.07	159	-15.07	4451	22	1411	1232
hsa-miR-3938	ENSG00000269609	ENST00000755289.1	RPARP-AS1	159	-15.07	159	-15.07	4452	22	1198	1023
hsa-miR-3938	ENSG00000269609	ENST00000492465.2	RPARP-AS1	159	-15.07	159	-15.07	4453	22	1556	1381
hsa-miR-3938	ENSG00000269609	ENST00000669625.1	RPARP-AS1	159	-15.07	159	-15.07	4454	22	1178	999
hsa-miR-3938	ENSG00000269609	ENST00000670059.1	RPARP-AS1	159	-15.07	159	-15.07	4455	22	1162	987
hsa-miR-3938	ENSG00000269609	ENST00000659211.1	RPARP-AS1	300	-37.09	159	-22.02	4459	22	2313	2166	422
hsa-miR-3938	ENSG00000269609	ENST00000755290.1	RPARP-AS1	159	-15.07	159	-15.07	4460	22	1123	948
hsa-miR-3938	ENSG00000269609	ENST00000598368.2	RPARP-AS1	159	-15.07	159	-15.07	4462	22	2458	2279
hsa-miR-3938	ENSG00000255367	ENST00000717881.1	AC127526.2	142	-25.43	142	-25.43	4536	22	2910	2082
hsa-miR-3938	ENSG00000255367	ENST00000717893.1	AC127526.2	143	-11.84	143	-11.84	4553	22	1047	486
hsa-miR-3938	ENSG00000255970	ENST00000835137.1	LINC02421	160	-16.46	160	-16.46	4603	22	841	1
hsa-miR-3938	ENSG00000255970	ENST00000542219.1	LINC02421	164	-20.16	164	-20.16	4604	22	3135	1189
hsa-miR-3938	ENSG00000271327	ENST00000605595.1	AC010201.2	310	-35.69	161	-17.91	4606	22	1495	696	497
hsa-miR-3938	ENSG00000276476	ENST00000721766.1	LINC00540	144	-17.21	144	-17.21	4621	22	2227	2125
hsa-miR-3938	ENSG00000262823	ENST00000576086.2	AC127521.1	155	-22.19	155	-22.19	4710	22	1053	405
hsa-miR-3938	ENSG00000262823	ENST00000577176.1	AC127521.1	155	-22.19	155	-22.19	4711	22	696	181
hsa-miR-3938	ENSG00000262823	ENST00000577064.1	AC127521.1	155	-22.19	155	-22.19	4712	22	575	189
hsa-miR-3938	ENSG00000277837	ENST00000620778.1	AC090340.1	141	-13.85	141	-13.85	4721	22	4980	4151
hsa-miR-3938	ENSG00000277067	ENST00000782238.1	CU634019.1	147	-25.67	147	-25.67	4761	22	2245	1162
hsa-miR-3938	ENSG00000232079	ENST00000426534.2	LINC01697	148	-15.74	148	-15.74	4795	22	1764	1240
hsa-miR-3938	ENSG00000232079	ENST00000657256.1	LINC01697	150	-14.09	150	-14.09	4798	22	1092	64
hsa-miR-3938	ENSG00000232079	ENST00000631186.1	LINC01697	150	-14.09	150	-14.09	4799	22	560	55
hsa-miR-3938	ENSG00000274225	ENST00000617205.2	AP001065.1	140	-14.17	140	-14.17	4805	22	1392	915
hsa-miR-3938	ENSG00000249923	ENST00000506039.2	AC007663.2	143	-16.88	143	-16.88	4806	22	2513	1026
hsa-miR-3938	ENSG00000236393	ENST00000447570.2	AC091806.1	148	-21.06	148	-21.06	4841	22	1959	1006
hsa-miR-3938	ENSG00000236393	ENST00000738323.1	AC091806.1	151	-18.29	151	-18.29	4844	22	655	209
hsa-miR-3938	ENSG00000236393	ENST00000738321.1	AC091806.1	151	-18.29	151	-18.29	4845	22	1086	39
hsa-miR-3938	ENSG00000236393	ENST00000738324.1	AC091806.1	151	-18.29	151	-18.29	4846	22	399	29
hsa-miR-3938	ENSG00000236393	ENST00000738322.1	AC091806.1	151	-18.29	151	-18.29	4848	22	988	17
hsa-miR-3938	ENSG00000284377	ENST00000741835.1	AL589669.1	140	-16.1	140	-16.1	4849	22	1404	1217
hsa-miR-3938	ENSG00000284377	ENST00000639829.1	AL589669.1	140	-16.1	140	-16.1	4850	22	1506	1320
hsa-miR-3938	ENSG00000284377	ENST00000701574.2	AL589669.1	140	-16.1	140	-16.1	4851	22	989	735
hsa-miR-3938	ENSG00000284377	ENST00000741836.1	AL589669.1	140	-16.1	140	-16.1	4853	22	1176	923
hsa-miR-3938	ENSG00000284377	ENST00000741837.1	AL589669.1	140	-16.1	140	-16.1	4854	22	905	654
hsa-miR-133a-5p	ENSG00000204792	ENST00000717897.1	LINC01291	144	-13.3	144	-13.3	4918	22	5575	2042
hsa-miR-133a-5p	ENSG00000204792	ENST00000435984.2	LINC01291	144	-13.3	144	-13.3	4919	22	5588	2055
hsa-miR-133a-5p	ENSG00000273033	ENST00000610128.2	LINC02035	141	-13.46	141	-13.46	4966	22	5476	2343
hsa-miR-133a-5p	ENSG00000244300	ENST00000669945.1	GATA2-AS1	140	-12.4	140	-12.4	4980	22	1655	1317
hsa-miR-133a-5p	ENSG00000243550	ENST00000692847.3	LINC01214	154	-17.18	154	-17.18	5012	22	2194	137
hsa-miR-133a-5p	ENSG00000243550	ENST00000716189.1	LINC01214	154	-17.18	154	-17.18	5013	22	1077	771
hsa-miR-133a-5p	ENSG00000243550	ENST00000749933.1	LINC01214	154	-17.18	154	-17.18	5014	22	541	264
hsa-miR-133a-5p	ENSG00000243550	ENST00000749935.1	LINC01214	154	-17.18	154	-17.18	5015	22	415	141
hsa-miR-133a-5p	ENSG00000243550	ENST00000749945.1	LINC01214	154	-17.18	154	-17.18	5016	22	484	211
hsa-miR-133a-5p	ENSG00000243550	ENST00000749937.1	LINC01214	154	-17.18	154	-17.18	5017	22	364	91
hsa-miR-133a-5p	ENSG00000243550	ENST00000749936.1	LINC01214	154	-17.18	154	-17.18	5018	22	561	288
hsa-miR-133a-5p	ENSG00000243550	ENST00000749916.1	LINC01214	154	-17.18	154	-17.18	5019	22	1132	859
hsa-miR-133a-5p	ENSG00000260918	ENST00000562284.1	AC107398.3	140	-10.62	140	-10.62	5024	22	7000	6646
hsa-miR-133a-5p	ENSG00000251442	ENST00000778506.1	LINC01094	144	-14.23	144	-14.23	5025	22	1536	1
hsa-miR-133a-5p	ENSG00000251442	ENST00000668669.1	LINC01094	286	-32.46	146	-20.83	5026	22	2476	2202	2021
hsa-miR-133a-5p	ENSG00000251442	ENST00000671622.2	LINC01094	286	-32.46	146	-20.83	5028	22	2989	2224	2043
hsa-miR-133a-5p	ENSG00000251442	ENST00000656991.2	LINC01094	286	-32.46	146	-20.83	5031	22	2393	2132	1951
hsa-miR-133a-5p	ENSG00000251442	ENST00000503539.8	LINC01094	286	-32.46	146	-20.83	5032	22	2509	2241	2060
hsa-miR-133a-5p	ENSG00000251442	ENST00000507802.6	LINC01094	286	-32.46	146	-20.83	5033	22	2485	2180	1999
hsa-miR-133a-5p	ENSG00000251442	ENST00000687467.2	LINC01094	286	-32.46	146	-20.83	5035	22	2119	1980	1799
hsa-miR-133a-5p	ENSG00000251442	ENST00000504675.7	LINC01094	286	-32.46	146	-20.83	5037	22	2336	2208	2027
hsa-miR-133a-5p	ENSG00000251442	ENST00000663250.2	LINC01094	286	-32.46	146	-20.83	5039	22	2383	1618	1437
hsa-miR-133a-5p	ENSG00000251442	ENST00000670146.2	LINC01094	286	-32.46	146	-20.83	5042	22	1967	1704	1523
hsa-miR-133a-5p	ENSG00000251442	ENST00000778512.1	LINC01094	286	-32.46	146	-20.83	5044	22	1490	1351	1170
hsa-miR-133a-5p	ENSG00000251442	ENST00000512322.2	LINC01094	286	-32.46	146	-20.83	5045	22	2225	1962	1781
hsa-miR-133a-5p	ENSG00000251442	ENST00000654343.1	LINC01094	286	-32.46	146	-20.83	5046	22	1680	1425	1244
hsa-miR-133a-5p	ENSG00000251442	ENST00000654792.1	LINC01094	286	-32.46	146	-20.83	5047	22	1778	1523	1342
hsa-miR-133a-5p	ENSG00000251442	ENST00000652918.1	LINC01094	286	-32.46	146	-20.83	5048	22	2207	1902	1721
hsa-miR-133a-5p	ENSG00000251442	ENST00000667455.1	LINC01094	286	-32.46	146	-20.83	5050	22	2266	2013	1832
hsa-miR-133a-5p	ENSG00000251442	ENST00000778519.1	LINC01094	146	-12.83	146	-12.83	5052	22	1153	266
hsa-miR-133a-5p	ENSG00000250978	ENST00000814276.1	AC079467.1	140	-14.9	140	-14.9	5076	22	907	56
hsa-miR-133a-5p	ENSG00000261211	ENST00000563225.2	AL031123.2	144	-18.45	144	-18.45	5086	22	6640	5334
hsa-miR-133a-5p	ENSG00000271553	ENST00000605836.1	AC018638.7	149	-15.04	149	-15.04	5201	22	1114	216
hsa-miR-133a-5p	ENSG00000272502	ENST00000605955.1	AC104958.2	157	-20.08	157	-20.08	5221	22	1141	820
hsa-miR-133a-5p	ENSG00000269609	ENST00000494270.7	RPARP-AS1	140	-15.6	140	-15.6	5258	22	2068	471
hsa-miR-133a-5p	ENSG00000269609	ENST00000663480.3	RPARP-AS1	140	-15.6	140	-15.6	5259	22	1549	454
hsa-miR-133a-5p	ENSG00000269609	ENST00000755288.1	RPARP-AS1	140	-15.6	140	-15.6	5262	22	1442	449
hsa-miR-133a-5p	ENSG00000269609	ENST00000492465.2	RPARP-AS1	140	-15.6	140	-15.6	5265	22	1556	465
hsa-miR-133a-5p	ENSG00000269609	ENST00000659211.1	RPARP-AS1	140	-15.6	140	-15.6	5271	22	2313	716
hsa-miR-133a-5p	ENSG00000255367	ENST00000717886.1	AC127526.2	148	-13.77	148	-13.77	5357	22	734	268
hsa-miR-133a-5p	ENSG00000257660	ENST00000803324.1	AC117498.2	145	-15.94	145	-15.94	5403	22	404	320
hsa-miR-133a-5p	ENSG00000257660	ENST00000803325.1	AC117498.2	145	-15.94	145	-15.94	5404	22	451	332
hsa-miR-133a-5p	ENSG00000257660	ENST00000547774.6	AC117498.2	145	-15.94	145	-15.94	5405	22	479	368
hsa-miR-133a-5p	ENSG00000257660	ENST00000549864.2	AC117498.2	145	-15.94	145	-15.94	5406	22	963	831
hsa-miR-133a-5p	ENSG00000257660	ENST00000803326.1	AC117498.2	145	-15.94	145	-15.94	5407	22	1227	1095
hsa-miR-133a-5p	ENSG00000257660	ENST00000803327.1	AC117498.2	145	-15.94	145	-15.94	5408	22	485	366
hsa-miR-133a-5p	ENSG00000257660	ENST00000803323.1	AC117498.2	145	-15.94	145	-15.94	5409	22	589	291
hsa-miR-133a-5p	ENSG00000257660	ENST00000803328.1	AC117498.2	145	-15.94	145	-15.94	5411	22	587	484
hsa-miR-133a-5p	ENSG00000241388	ENST00000539163.1	HNF1A-AS1	142	-15.18	142	-15.18	5430	22	2455	1050
hsa-miR-133a-5p	ENSG00000276476	ENST00000721764.1	LINC00540	144	-19.41	144	-19.41	5435	22	1452	1121
hsa-miR-133a-5p	ENSG00000258548	ENST00000662039.1	LINC00645	152	-17.84	152	-17.84	5457	22	931	261
hsa-miR-133a-5p	ENSG00000258548	ENST00000557359.6	LINC00645	144	-16.24	144	-16.24	5458	22	3495	1178
hsa-miR-133a-5p	ENSG00000258548	ENST00000663380.1	LINC00645	144	-16.24	144	-16.24	5459	22	3213	1061
hsa-miR-133a-5p	ENSG00000258548	ENST00000557399.1	LINC00645	144	-16.24	144	-16.24	5460	22	3512	1195
hsa-miR-133a-5p	ENSG00000258548	ENST00000669384.1	LINC00645	144	-16.24	144	-16.24	5461	22	3394	1179
hsa-miR-133a-5p	ENSG00000235269	ENST00000728991.1	LINC02331	140	-17	140	-17	5468	22	1257	45
hsa-miR-133a-5p	ENSG00000260740	ENST00000565137.1	AC026471.3	140	-16.54	140	-16.54	5513	22	578	191
hsa-miR-133a-5p	ENSG00000277067	ENST00000621909.5	CU634019.1	148	-18.54	148	-18.54	5561	22	2464	1152
hsa-miR-133a-5p	ENSG00000277067	ENST00000623394.4	CU634019.1	140	-14.62	140	-14.62	5565	22	1492	980
hsa-miR-133a-5p	ENSG00000277067	ENST00000782213.1	CU634019.1	148	-18.54	148	-18.54	5566	22	2198	886
hsa-miR-133a-5p	ENSG00000277067	ENST00000623095.4	CU634019.1	148	-18.54	148	-18.54	5568	22	2411	1099
hsa-miR-133a-5p	ENSG00000277067	ENST00000782229.1	CU634019.1	148	-18.54	148	-18.54	5569	22	1671	1135
hsa-miR-133a-5p	ENSG00000277067	ENST00000782228.1	CU634019.1	148	-18.54	148	-18.54	5574	22	1723	1181
hsa-miR-133a-5p	ENSG00000277067	ENST00000782240.1	CU634019.1	141	-15.7	141	-15.7	5576	22	670	354
hsa-miR-133a-5p	ENSG00000277067	ENST00000782230.1	CU634019.1	148	-18.54	148	-18.54	5577	22	1787	1245
hsa-miR-133a-5p	ENSG00000277067	ENST00000782214.1	CU634019.1	148	-18.54	148	-18.54	5578	22	2217	905
hsa-miR-133a-5p	ENSG00000277067	ENST00000624310.2	CU634019.1	140	-14.62	140	-14.62	5580	22	1193	684
hsa-miR-133a-5p	ENSG00000277067	ENST00000782219.1	CU634019.1	148	-18.54	148	-18.54	5581	22	2409	1176
hsa-miR-133a-5p	ENSG00000277067	ENST00000782237.1	CU634019.1	140	-14.62	140	-14.62	5584	22	1033	738
hsa-miR-133a-5p	ENSG00000277067	ENST00000782231.1	CU634019.1	148	-18.54	148	-18.54	5585	22	1489	947
hsa-miR-133a-5p	ENSG00000277067	ENST00000782215.1	CU634019.1	148	-18.54	148	-18.54	5586	22	2284	975
hsa-miR-133a-5p	ENSG00000277067	ENST00000782226.1	CU634019.1	148	-18.54	148	-18.54	5587	22	1964	1169
hsa-miR-133a-5p	ENSG00000277067	ENST00000782224.1	CU634019.1	148	-18.54	148	-18.54	5588	22	2314	1163
hsa-miR-133a-5p	ENSG00000277067	ENST00000782216.1	CU634019.1	148	-18.54	148	-18.54	5589	22	2392	1080
hsa-miR-133a-5p	ENSG00000277067	ENST00000782236.1	CU634019.1	140	-14.62	140	-14.62	5593	22	1342	828
hsa-miR-133a-5p	ENSG00000277067	ENST00000782232.1	CU634019.1	148	-18.54	148	-18.54	5595	22	1484	948
hsa-miR-133a-5p	ENSG00000277067	ENST00000782233.1	CU634019.1	148	-18.54	148	-18.54	5603	22	1595	1053
hsa-miR-133a-5p	ENSG00000277067	ENST00000782217.1	CU634019.1	148	-18.54	148	-18.54	5605	22	2305	996
hsa-miR-133a-5p	ENSG00000277067	ENST00000615804.1	CU634019.1	148	-18.54	148	-18.54	5606	22	2195	884
hsa-miR-133a-5p	ENSG00000249923	ENST00000824279.1	AC007663.2	143	-18.61	143	-18.61	5619	22	2023	1953
hsa-miR-133a-5p	ENSG00000226328	ENST00000665704.1	NUP50-AS1	168	-19.89	168	-19.89	5631	22	2031	67
hsa-let-7e-3p	ENSG00000204792	ENST00000717897.1	LINC01291	143	-20.78	143	-20.78	5730	22	5575	4468
hsa-let-7e-3p	ENSG00000204792	ENST00000435984.2	LINC01291	143	-20.78	143	-20.78	5731	22	5588	4481
hsa-let-7e-3p	ENSG00000204792	ENST00000453951.1	LINC01291	143	-20.78	143	-20.78	5733	22	1266	983
hsa-let-7e-3p	ENSG00000230943	ENST00000788903.1	LINC02541	144	-18.25	144	-18.25	5940	22	1474	36
hsa-let-7e-3p	ENSG00000230943	ENST00000788902.1	LINC02541	144	-18.25	144	-18.25	5941	22	1610	55
hsa-let-7e-3p	ENSG00000230943	ENST00000788900.1	LINC02541	144	-18.25	144	-18.25	5942	22	1483	62
hsa-let-7e-3p	ENSG00000230943	ENST00000788899.1	LINC02541	144	-18.25	144	-18.25	5943	22	1627	67
hsa-let-7e-3p	ENSG00000230943	ENST00000788898.1	LINC02541	144	-18.25	144	-18.25	5944	22	1665	106
hsa-let-7e-3p	ENSG00000230943	ENST00000788901.1	LINC02541	144	-18.25	144	-18.25	5947	22	1534	65
hsa-let-7e-3p	ENSG00000230943	ENST00000788908.1	LINC02541	144	-18.25	144	-18.25	5953	22	1160	76
hsa-let-7e-3p	ENSG00000230943	ENST00000788914.1	LINC02541	144	-18.25	144	-18.25	5962	22	493	73
hsa-let-7e-3p	ENSG00000254109	ENST00000792122.1	RBPMS-AS1	140	-27.96	140	-27.96	6016	22	1520	155
hsa-let-7e-3p	ENSG00000254109	ENST00000792128.1	RBPMS-AS1	140	-27.96	140	-27.96	6019	22	1005	87
hsa-let-7e-3p	ENSG00000254109	ENST00000792131.1	RBPMS-AS1	140	-27.96	140	-27.96	6020	22	735	83
hsa-let-7e-3p	ENSG00000254109	ENST00000792127.1	RBPMS-AS1	140	-27.96	140	-27.96	6021	22	1015	222
hsa-let-7e-3p	ENSG00000254109	ENST00000792126.1	RBPMS-AS1	140	-27.96	140	-27.96	6024	22	816	25
hsa-let-7e-3p	ENSG00000254109	ENST00000519753.2	RBPMS-AS1	140	-27.96	140	-27.96	6027	22	1036	151
hsa-let-7e-3p	ENSG00000254109	ENST00000517521.5	RBPMS-AS1	140	-27.96	140	-27.96	6028	22	909	259
hsa-let-7e-3p	ENSG00000254109	ENST00000792133.1	RBPMS-AS1	140	-27.96	140	-27.96	6029	22	1029	149
hsa-let-7e-3p	ENSG00000254109	ENST00000792132.1	RBPMS-AS1	140	-27.96	140	-27.96	6030	22	951	71
hsa-let-7e-3p	ENSG00000254109	ENST00000662163.1	RBPMS-AS1	140	-27.96	140	-27.96	6031	22	767	67
hsa-let-7e-3p	ENSG00000261889	ENST00000570843.1	AC108134.2	146	-13.28	146	-13.28	6324	22	748	135
hsa-let-7e-3p	ENSG00000267296	ENST00000718468.1	CEBPA-AS1	144	-16.87	144	-16.87	6349	22	796	52
hsa-let-7e-3p	ENSG00000267296	ENST00000718469.1	CEBPA-AS1	144	-16.87	144	-16.87	6350	22	1378	7
hsa-let-7e-3p	ENSG00000267296	ENST00000718470.1	CEBPA-AS1	144	-16.87	144	-16.87	6351	22	1172	1
hsa-miR-487a-5p	ENSG00000224259	ENST00000772285.1	LINC01133	155	-22.3	155	-22.3	6505	22	822	435
hsa-miR-487a-5p	ENSG00000224259	ENST00000772286.1	LINC01133	155	-22.3	155	-22.3	6506	22	1273	886
hsa-miR-487a-5p	ENSG00000224259	ENST00000772287.1	LINC01133	155	-22.3	155	-22.3	6508	22	1325	1011
hsa-miR-487a-5p	ENSG00000224259	ENST00000657602.1	LINC01133	155	-22.3	155	-22.3	6511	22	1418	1002
hsa-miR-487a-5p	ENSG00000224259	ENST00000423943.4	LINC01133	155	-22.3	155	-22.3	6512	22	1478	872
hsa-miR-487a-5p	ENSG00000224259	ENST00000772289.1	LINC01133	155	-22.3	155	-22.3	6514	22	413	351
hsa-miR-487a-5p	ENSG00000224259	ENST00000772296.1	LINC01133	155	-22.3	155	-22.3	6515	22	723	331
hsa-miR-487a-5p	ENSG00000224259	ENST00000443364.8	LINC01133	155	-22.3	155	-22.3	6516	22	1358	946
hsa-miR-487a-5p	ENSG00000224259	ENST00000772290.1	LINC01133	155	-22.3	155	-22.3	6517	22	539	477
hsa-miR-487a-5p	ENSG00000224259	ENST00000701616.2	LINC01133	155	-22.3	155	-22.3	6520	22	795	403
hsa-miR-487a-5p	ENSG00000224259	ENST00000772299.1	LINC01133	155	-22.3	155	-22.3	6522	22	1207	893
hsa-miR-487a-5p	ENSG00000224259	ENST00000772297.1	LINC01133	155	-22.3	155	-22.3	6523	22	734	347
hsa-miR-487a-5p	ENSG00000224259	ENST00000772294.1	LINC01133	155	-22.3	155	-22.3	6527	22	741	664
hsa-miR-487a-5p	ENSG00000204792	ENST00000840152.1	LINC01291	159	-17.61	159	-17.61	6535	22	1538	1181
hsa-miR-487a-5p	ENSG00000204792	ENST00000840154.1	LINC01291	159	-17.61	159	-17.61	6537	22	1282	926
hsa-miR-487a-5p	ENSG00000204792	ENST00000418204.2	LINC01291	159	-17.61	159	-17.61	6538	22	1619	1265
hsa-miR-487a-5p	ENSG00000204792	ENST00000840155.1	LINC01291	159	-17.61	159	-17.61	6539	22	1632	1276
hsa-miR-487a-5p	ENSG00000204792	ENST00000840153.1	LINC01291	159	-17.61	159	-17.61	6540	22	1575	1218
hsa-miR-487a-5p	ENSG00000204792	ENST00000840156.1	LINC01291	159	-17.61	159	-17.61	6541	22	1524	1168
hsa-miR-487a-5p	ENSG00000204792	ENST00000717897.1	LINC01291	299	-28.36	159	-17.61	6542	22	5575	1397	2905
hsa-miR-487a-5p	ENSG00000204792	ENST00000435984.2	LINC01291	299	-28.36	159	-17.61	6543	22	5588	1410	2918
hsa-miR-487a-5p	ENSG00000204792	ENST00000453951.1	LINC01291	140	-10.75	140	-10.75	6545	22	1266	269
hsa-miR-487a-5p	ENSG00000273033	ENST00000610128.2	LINC02035	145	-18.28	145	-18.28	6590	22	5476	603
hsa-miR-487a-5p	ENSG00000243550	ENST00000749931.1	LINC01214	149	-12.83	149	-12.83	6616	22	431	52
hsa-miR-487a-5p	ENSG00000243550	ENST00000749929.1	LINC01214	149	-12.83	149	-12.83	6618	22	610	171
hsa-miR-487a-5p	ENSG00000243550	ENST00000749928.1	LINC01214	149	-12.83	149	-12.83	6619	22	846	189
hsa-miR-487a-5p	ENSG00000243550	ENST00000749927.1	LINC01214	149	-12.83	149	-12.83	6620	22	586	199
hsa-miR-487a-5p	ENSG00000243550	ENST00000749925.1	LINC01214	150	-15.37	150	-15.37	6621	22	426	20
hsa-miR-487a-5p	ENSG00000243550	ENST00000749926.1	LINC01214	149	-12.83	149	-12.83	6622	22	547	160
hsa-miR-487a-5p	ENSG00000243550	ENST00000749923.1	LINC01214	150	-15.37	150	-15.37	6624	22	425	43
hsa-miR-487a-5p	ENSG00000243550	ENST00000749922.1	LINC01214	150	-15.37	150	-15.37	6625	22	453	63
hsa-miR-487a-5p	ENSG00000243550	ENST00000749919.1	LINC01214	149	-13.99	149	-13.99	6628	22	432	29
hsa-miR-487a-5p	ENSG00000243550	ENST00000749918.1	LINC01214	149	-13.99	149	-13.99	6630	22	460	73
hsa-miR-487a-5p	ENSG00000243550	ENST00000471222.3	LINC01214	149	-12.83	149	-12.83	6633	22	522	136
hsa-miR-487a-5p	ENSG00000243550	ENST00000749932.1	LINC01214	149	-12.83	149	-12.83	6634	22	569	189
hsa-miR-487a-5p	ENSG00000243550	ENST00000716188.1	LINC01214	149	-12.83	149	-12.83	6635	22	569	175
hsa-miR-487a-5p	ENSG00000243550	ENST00000670456.1	LINC01214	149	-15.75	149	-15.75	6644	22	2949	952
hsa-miR-487a-5p	ENSG00000251442	ENST00000778520.1	LINC01094	140	-10.6	140	-10.6	6651	22	1094	1036
hsa-miR-487a-5p	ENSG00000251442	ENST00000503259.6	LINC01094	140	-10.6	140	-10.6	6654	22	2560	831
hsa-miR-487a-5p	ENSG00000251442	ENST00000778522.1	LINC01094	140	-10.6	140	-10.6	6658	22	726	659
hsa-miR-487a-5p	ENSG00000251442	ENST00000514130.6	LINC01094	140	-10.6	140	-10.6	6667	22	2095	695
hsa-miR-487a-5p	ENSG00000251442	ENST00000778523.1	LINC01094	144	-14.32	144	-14.32	6673	22	2647	360
hsa-miR-487a-5p	ENSG00000251442	ENST00000666953.1	LINC01094	140	-10.6	140	-10.6	6678	22	1846	405
hsa-miR-487a-5p	ENSG00000261211	ENST00000563225.2	AL031123.2	143	-19.31	143	-19.31	6710	22	6640	3487
hsa-miR-487a-5p	ENSG00000233760	ENST00000780909.1	AC004947.1	312	-38.67	163	-23.12	6813	22	1746	304	1366
hsa-miR-487a-5p	ENSG00000233760	ENST00000667848.1	AC004947.1	149	-15.55	149	-15.55	6815	22	1465	609
hsa-miR-487a-5p	ENSG00000233760	ENST00000420912.2	AC004947.1	149	-15.55	149	-15.55	6816	22	2857	762
hsa-miR-487a-5p	ENSG00000233760	ENST00000457000.2	AC004947.1	149	-15.55	149	-15.55	6817	22	1431	743
hsa-miR-487a-5p	ENSG00000233760	ENST00000780911.1	AC004947.1	149	-15.55	149	-15.55	6818	22	1532	743
hsa-miR-487a-5p	ENSG00000233760	ENST00000654600.2	AC004947.1	149	-15.55	149	-15.55	6819	22	1405	636
hsa-miR-487a-5p	ENSG00000233760	ENST00000780910.1	AC004947.1	149	-15.55	149	-15.55	6820	22	1483	627
hsa-miR-487a-5p	ENSG00000233760	ENST00000653682.1	AC004947.1	149	-15.55	149	-15.55	6821	22	2669	710
hsa-miR-487a-5p	ENSG00000233760	ENST00000660447.1	AC004947.1	149	-15.55	149	-15.55	6822	22	1293	688
hsa-miR-487a-5p	ENSG00000233760	ENST00000430426.3	AC004947.1	149	-15.55	149	-15.55	6823	22	841	461
hsa-miR-487a-5p	ENSG00000269609	ENST00000755285.1	RPARP-AS1	142	-18.78	142	-18.78	6877	22	1240	287
hsa-miR-487a-5p	ENSG00000269609	ENST00000755282.1	RPARP-AS1	142	-18.78	142	-18.78	6878	22	1218	257
hsa-miR-487a-5p	ENSG00000269609	ENST00000755283.1	RPARP-AS1	142	-18.78	142	-18.78	6879	22	1244	283
hsa-miR-487a-5p	ENSG00000269609	ENST00000755284.1	RPARP-AS1	142	-18.78	142	-18.78	6880	22	1416	455
hsa-miR-487a-5p	ENSG00000269609	ENST00000473970.4	RPARP-AS1	142	-18.78	142	-18.78	6881	22	1313	351
hsa-miR-487a-5p	ENSG00000269609	ENST00000494270.7	RPARP-AS1	142	-18.78	142	-18.78	6882	22	2068	1139
hsa-miR-487a-5p	ENSG00000269609	ENST00000663480.3	RPARP-AS1	142	-18.78	142	-18.78	6883	22	1549	588
hsa-miR-487a-5p	ENSG00000269609	ENST00000755287.1	RPARP-AS1	142	-18.78	142	-18.78	6884	22	1549	592
hsa-miR-487a-5p	ENSG00000269609	ENST00000657934.2	RPARP-AS1	142	-18.78	142	-18.78	6885	22	1455	494
hsa-miR-487a-5p	ENSG00000269609	ENST00000755288.1	RPARP-AS1	142	-18.78	142	-18.78	6886	22	1442	485
hsa-miR-487a-5p	ENSG00000269609	ENST00000755286.1	RPARP-AS1	142	-18.78	142	-18.78	6887	22	1411	450
hsa-miR-487a-5p	ENSG00000269609	ENST00000755289.1	RPARP-AS1	142	-18.78	142	-18.78	6888	22	1198	241
hsa-miR-487a-5p	ENSG00000269609	ENST00000492465.2	RPARP-AS1	142	-18.78	142	-18.78	6889	22	1556	599
hsa-miR-487a-5p	ENSG00000269609	ENST00000669625.1	RPARP-AS1	142	-18.78	142	-18.78	6890	22	1178	217
hsa-miR-487a-5p	ENSG00000269609	ENST00000670059.1	RPARP-AS1	142	-18.78	142	-18.78	6891	22	1162	205
hsa-miR-487a-5p	ENSG00000269609	ENST00000594818.1	RPARP-AS1	142	-18.78	142	-18.78	6892	22	445	138
hsa-miR-487a-5p	ENSG00000269609	ENST00000596366.1	RPARP-AS1	142	-18.78	142	-18.78	6893	22	631	84
hsa-miR-487a-5p	ENSG00000269609	ENST00000659211.1	RPARP-AS1	142	-18.78	142	-18.78	6895	22	2313	1384
hsa-miR-487a-5p	ENSG00000269609	ENST00000755290.1	RPARP-AS1	142	-18.78	142	-18.78	6896	22	1123	166
hsa-miR-487a-5p	ENSG00000269609	ENST00000598368.2	RPARP-AS1	142	-18.78	142	-18.78	6898	22	2458	1497
hsa-miR-487a-5p	ENSG00000255367	ENST00000717868.1	AC127526.2	168	-24.23	168	-24.23	6956	22	604	514
hsa-miR-487a-5p	ENSG00000255367	ENST00000717881.1	AC127526.2	286	-35.05	146	-19.05	6972	22	2910	704	1130
hsa-miR-487a-5p	ENSG00000255367	ENST00000717890.1	AC127526.2	143	-23	143	-23	6985	22	473	279
hsa-miR-487a-5p	ENSG00000255970	ENST00000542219.1	LINC02421	142	-14.54	142	-14.54	7040	22	3135	2713
hsa-miR-487a-5p	ENSG00000235269	ENST00000728989.1	LINC02331	159	-16.29	159	-16.29	7091	22	1833	786
hsa-miR-487a-5p	ENSG00000235269	ENST00000728990.1	LINC02331	159	-16.29	159	-16.29	7093	22	1460	973
hsa-miR-487a-5p	ENSG00000258824	ENST00000556640.1	AL122035.1	159	-17.71	159	-17.71	7094	22	550	117
hsa-miR-487a-5p	ENSG00000262294	ENST00000571512.2	AC129507.2	144	-20.92	144	-20.92	7142	22	1612	487
hsa-miR-487a-5p	ENSG00000266968	ENST00000590535.2	AC023421.1	154	-12.57	154	-12.57	7156	22	1785	281
hsa-miR-487a-5p	ENSG00000276980	ENST00000614781.1	AC008760.2	168	-19.02	168	-19.02	7159	22	1357	67
hsa-miR-487a-5p	ENSG00000277067	ENST00000623394.4	CU634019.1	150	-18.63	150	-18.63	7189	22	1492	411
hsa-miR-487a-5p	ENSG00000277067	ENST00000782215.1	CU634019.1	150	-18.63	150	-18.63	7210	22	2284	246
hsa-miR-487a-5p	ENSG00000277067	ENST00000782216.1	CU634019.1	150	-18.63	150	-18.63	7213	22	2392	351
hsa-miR-487a-5p	ENSG00000277067	ENST00000782239.1	CU634019.1	150	-18.63	150	-18.63	7222	22	725	323
hsa-miR-487a-5p	ENSG00000225431	ENST00000419628.2	LINC01671	140	-8.51	140	-8.51	7240	22	1811	739
hsa-miR-487a-5p	ENSG00000249923	ENST00000506039.2	AC007663.2	155	-23.64	155	-23.64	7242	22	2513	1634
hsa-miR-487a-5p	ENSG00000249923	ENST00000824279.1	AC007663.2	150	-13.04	150	-13.04	7243	22	2023	901
hsa-miR-487a-5p	ENSG00000249923	ENST00000824276.1	AC007663.2	144	-20.14	144	-20.14	7252	22	1627	241
hsa-miR-487a-5p	ENSG00000236393	ENST00000738318.1	AC091806.1	294	-25.77	148	-14.63	7275	22	1912	703	1019
hsa-miR-487a-5p	ENSG00000236393	ENST00000452690.1	AC091806.1	148	-14.63	148	-14.63	7276	22	3000	326
hsa-miR-487a-5p	ENSG00000236393	ENST00000447570.2	AC091806.1	148	-14.63	148	-14.63	7277	22	1959	277
hsa-miR-487a-5p	ENSG00000236393	ENST00000653973.1	AC091806.1	148	-14.63	148	-14.63	7278	22	724	234
hsa-miR-1226-5p	ENSG00000284708	ENST00000642131.1	AL031731.1	148	-21.99	148	-21.99	7309	26	2094	610
hsa-miR-1226-5p	ENSG00000224259	ENST00000772303.1	LINC01133	141	-26.44	141	-26.44	7312	26	522	463
hsa-miR-1226-5p	ENSG00000224259	ENST00000772304.1	LINC01133	141	-27.6	141	-27.6	7315	26	1354	1028
hsa-miR-1226-5p	ENSG00000224259	ENST00000772285.1	LINC01133	158	-31.77	158	-31.77	7317	26	822	502
hsa-miR-1226-5p	ENSG00000224259	ENST00000772286.1	LINC01133	158	-31.77	158	-31.77	7318	26	1273	953
hsa-miR-1226-5p	ENSG00000224259	ENST00000772287.1	LINC01133	158	-31.77	158	-31.77	7320	26	1325	1078
hsa-miR-1226-5p	ENSG00000224259	ENST00000657602.1	LINC01133	158	-31.77	158	-31.77	7323	26	1418	1069
hsa-miR-1226-5p	ENSG00000224259	ENST00000423943.4	LINC01133	158	-31.77	158	-31.77	7324	26	1478	939
hsa-miR-1226-5p	ENSG00000224259	ENST00000772296.1	LINC01133	158	-31.77	158	-31.77	7327	26	723	398
hsa-miR-1226-5p	ENSG00000224259	ENST00000443364.8	LINC01133	158	-31.77	158	-31.77	7328	26	1358	1013
hsa-miR-1226-5p	ENSG00000224259	ENST00000772283.1	LINC01133	140	-29.07	140	-29.07	7330	26	804	351
hsa-miR-1226-5p	ENSG00000224259	ENST00000701616.2	LINC01133	158	-31.77	158	-31.77	7332	26	795	470
hsa-miR-1226-5p	ENSG00000224259	ENST00000772284.1	LINC01133	140	-29.07	140	-29.07	7333	26	932	480
hsa-miR-1226-5p	ENSG00000224259	ENST00000772299.1	LINC01133	158	-31.77	158	-31.77	7334	26	1207	960
hsa-miR-1226-5p	ENSG00000224259	ENST00000772297.1	LINC01133	158	-31.77	158	-31.77	7335	26	734	414
hsa-miR-1226-5p	ENSG00000204792	ENST00000717897.1	LINC01291	140	-28.91	140	-28.91	7354	26	5575	3548
hsa-miR-1226-5p	ENSG00000204792	ENST00000435984.2	LINC01291	140	-28.91	140	-28.91	7355	26	5588	3561
hsa-miR-1226-5p	ENSG00000204792	ENST00000377469.1	LINC01291	310	-54.78	155	-29.3	7356	26	3662	2328	2458
hsa-miR-1226-5p	ENSG00000228791	ENST00000608893.6	THRB-AS1	146	-25.6	146	-25.6	7391	26	1416	246
hsa-miR-1226-5p	ENSG00000228791	ENST00000594183.1	THRB-AS1	153	-36.44	153	-36.44	7395	26	837	4
hsa-miR-1226-5p	ENSG00000228791	ENST00000630391.1	THRB-AS1	295	-42.81	148	-22.25	7396	26	1992	276	122
hsa-miR-1226-5p	ENSG00000228791	ENST00000807235.1	THRB-AS1	148	-33.64	148	-33.64	7397	26	366	60
hsa-miR-1226-5p	ENSG00000273033	ENST00000610128.2	LINC02035	162	-25.05	162	-25.05	7402	26	5476	2671
hsa-miR-1226-5p	ENSG00000244300	ENST00000740170.1	GATA2-AS1	144	-27.27	144	-27.27	7404	26	763	433
hsa-miR-1226-5p	ENSG00000244300	ENST00000740171.1	GATA2-AS1	144	-27.27	144	-27.27	7405	26	840	472
hsa-miR-1226-5p	ENSG00000244300	ENST00000740166.1	GATA2-AS1	426	-85.84	144	-31.88	7406	26	1681	324	408	1071
hsa-miR-1226-5p	ENSG00000244300	ENST00000740167.1	GATA2-AS1	284	-53.96	144	-27.27	7407	26	1604	289	999
hsa-miR-1226-5p	ENSG00000244300	ENST00000740172.1	GATA2-AS1	144	-27.27	144	-27.27	7408	26	764	420
hsa-miR-1226-5p	ENSG00000244300	ENST00000740173.1	GATA2-AS1	144	-27.27	144	-27.27	7409	26	965	610
hsa-miR-1226-5p	ENSG00000244300	ENST00000464242.2	GATA2-AS1	144	-27.27	144	-27.27	7411	26	1172	448
hsa-miR-1226-5p	ENSG00000244300	ENST00000468377.1	GATA2-AS1	304	-63.79	160	-36.52	7412	26	1578	897	782
hsa-miR-1226-5p	ENSG00000244300	ENST00000740168.1	GATA2-AS1	426	-85.84	144	-31.88	7413	26	1759	400	484	1147
hsa-miR-1226-5p	ENSG00000244300	ENST00000473958.1	GATA2-AS1	144	-27.27	144	-27.27	7414	26	722	649
hsa-miR-1226-5p	ENSG00000244300	ENST00000740169.1	GATA2-AS1	426	-85.84	144	-31.88	7415	26	1667	377	461	1124
hsa-miR-1226-5p	ENSG00000244300	ENST00000669945.1	GATA2-AS1	304	-63.79	160	-36.52	7416	26	1655	352	237
hsa-miR-1226-5p	ENSG00000244300	ENST00000740176.1	GATA2-AS1	282	-58.57	142	-31.88	7418	26	1241	388	1051
hsa-miR-1226-5p	ENSG00000243550	ENST00000716187.1	LINC01214	147	-36.1	147	-36.1	7444	26	933	130
hsa-miR-1226-5p	ENSG00000243550	ENST00000670456.1	LINC01214	144	-35.45	144	-35.45	7456	26	2949	2324
hsa-miR-1226-5p	ENSG00000243550	ENST00000716190.1	LINC01214	147	-36.1	147	-36.1	7457	26	1090	128
hsa-miR-1226-5p	ENSG00000260918	ENST00000562284.1	AC107398.3	436	-77.33	146	-26.81	7460	26	7000	2030	2803	4748
hsa-miR-1226-5p	ENSG00000251442	ENST00000668669.1	LINC01094	153	-29.02	153	-29.02	7462	26	2476	2345
hsa-miR-1226-5p	ENSG00000251442	ENST00000671622.2	LINC01094	153	-29.02	153	-29.02	7464	26	2989	2367
hsa-miR-1226-5p	ENSG00000251442	ENST00000656991.2	LINC01094	153	-29.02	153	-29.02	7467	26	2393	2275
hsa-miR-1226-5p	ENSG00000251442	ENST00000503539.8	LINC01094	153	-29.02	153	-29.02	7468	26	2509	2384
hsa-miR-1226-5p	ENSG00000251442	ENST00000507802.6	LINC01094	153	-29.02	153	-29.02	7469	26	2485	2323
hsa-miR-1226-5p	ENSG00000251442	ENST00000663250.2	LINC01094	153	-29.02	153	-29.02	7475	26	2383	1761
hsa-miR-1226-5p	ENSG00000251442	ENST00000670146.2	LINC01094	153	-29.02	153	-29.02	7478	26	1967	1847
hsa-miR-1226-5p	ENSG00000251442	ENST00000512322.2	LINC01094	153	-29.02	153	-29.02	7481	26	2225	2105
hsa-miR-1226-5p	ENSG00000251442	ENST00000654343.1	LINC01094	153	-29.02	153	-29.02	7482	26	1680	1568
hsa-miR-1226-5p	ENSG00000251442	ENST00000654792.1	LINC01094	153	-29.02	153	-29.02	7483	26	1778	1666
hsa-miR-1226-5p	ENSG00000251442	ENST00000652918.1	LINC01094	153	-29.02	153	-29.02	7484	26	2207	2045
hsa-miR-1226-5p	ENSG00000251442	ENST00000667455.1	LINC01094	153	-29.02	153	-29.02	7486	26	2266	2156
hsa-miR-1226-5p	ENSG00000284968	ENST00000508280.6	AC093827.4	148	-30.25	148	-30.25	7504	26	2158	1694
hsa-miR-1226-5p	ENSG00000284968	ENST00000503159.1	AC093827.4	294	-46.31	152	-23.17	7507	26	572	290	262
hsa-miR-1226-5p	ENSG00000271119	ENST00000605200.1	AC026412.3	288	-55.73	148	-30.61	7509	26	1661	1437	1479
hsa-miR-1226-5p	ENSG00000250978	ENST00000515184.2	AC079467.1	286	-54.32	146	-27.93	7510	26	2570	1900	1950
hsa-miR-1226-5p	ENSG00000272320	ENST00000607565.1	AL445309.1	151	-26.45	151	-26.45	7520	26	1989	999
hsa-miR-1226-5p	ENSG00000261211	ENST00000563225.2	AL031123.2	140	-27.1	140	-27.1	7522	26	6640	4663
hsa-miR-1226-5p	ENSG00000285216	ENST00000644718.1	AL355499.2	140	-29.55	140	-29.55	7526	26	866	197
hsa-miR-1226-5p	ENSG00000232316	ENST00000835253.1	LINC02518	145	-18.83	145	-18.83	7554	26	1372	622
hsa-miR-1226-5p	ENSG00000232316	ENST00000835254.1	LINC02518	140	-16.14	140	-16.14	7555	26	1115	557
hsa-miR-1226-5p	ENSG00000230943	ENST00000788889.1	LINC02541	144	-24.63	144	-24.63	7556	26	1451	546
hsa-miR-1226-5p	ENSG00000230943	ENST00000788910.1	LINC02541	144	-24.63	144	-24.63	7557	26	1600	696
hsa-miR-1226-5p	ENSG00000230943	ENST00000788883.1	LINC02541	144	-24.63	144	-24.63	7558	26	1417	513
hsa-miR-1226-5p	ENSG00000230943	ENST00000788912.1	LINC02541	144	-24.63	144	-24.63	7559	26	1646	743
hsa-miR-1226-5p	ENSG00000230943	ENST00000788911.1	LINC02541	144	-24.63	144	-24.63	7560	26	1480	747
hsa-miR-1226-5p	ENSG00000230943	ENST00000788915.1	LINC02541	144	-24.63	144	-24.63	7561	26	1497	595
hsa-miR-1226-5p	ENSG00000230943	ENST00000788913.1	LINC02541	144	-24.63	144	-24.63	7562	26	1590	688
hsa-miR-1226-5p	ENSG00000230943	ENST00000654213.2	LINC02541	144	-24.63	144	-24.63	7563	26	1707	805
hsa-miR-1226-5p	ENSG00000230943	ENST00000788903.1	LINC02541	144	-24.63	144	-24.63	7564	26	1474	572
hsa-miR-1226-5p	ENSG00000230943	ENST00000788902.1	LINC02541	144	-24.63	144	-24.63	7565	26	1610	708
hsa-miR-1226-5p	ENSG00000230943	ENST00000788900.1	LINC02541	144	-24.63	144	-24.63	7566	26	1483	581
hsa-miR-1226-5p	ENSG00000230943	ENST00000788899.1	LINC02541	144	-24.63	144	-24.63	7567	26	1627	725
hsa-miR-1226-5p	ENSG00000230943	ENST00000788898.1	LINC02541	144	-24.63	144	-24.63	7568	26	1665	763
hsa-miR-1226-5p	ENSG00000230943	ENST00000788886.1	LINC02541	144	-24.63	144	-24.63	7569	26	1208	306
hsa-miR-1226-5p	ENSG00000230943	ENST00000788885.1	LINC02541	144	-24.63	144	-24.63	7570	26	1504	602
hsa-miR-1226-5p	ENSG00000230943	ENST00000788901.1	LINC02541	144	-24.63	144	-24.63	7571	26	1534	635
hsa-miR-1226-5p	ENSG00000230943	ENST00000788887.1	LINC02541	144	-24.63	144	-24.63	7572	26	1438	539
hsa-miR-1226-5p	ENSG00000230943	ENST00000788884.1	LINC02541	144	-24.63	144	-24.63	7573	26	1429	530
hsa-miR-1226-5p	ENSG00000230943	ENST00000649523.1	LINC02541	144	-24.63	144	-24.63	7574	26	1879	1000
hsa-miR-1226-5p	ENSG00000230943	ENST00000788888.1	LINC02541	144	-24.63	144	-24.63	7575	26	1264	559
hsa-miR-1226-5p	ENSG00000230943	ENST00000788897.1	LINC02541	284	-52.68	144	-28.05	7576	26	1286	584	86
hsa-miR-1226-5p	ENSG00000230943	ENST00000788908.1	LINC02541	144	-24.63	144	-24.63	7577	26	1160	782
hsa-miR-1226-5p	ENSG00000230943	ENST00000657627.1	LINC02541	144	-24.63	144	-24.63	7578	26	802	715
hsa-miR-1226-5p	ENSG00000230943	ENST00000788909.1	LINC02541	140	-28.05	140	-28.05	7581	26	515	192
hsa-miR-1226-5p	ENSG00000230943	ENST00000788907.1	LINC02541	140	-28.05	140	-28.05	7594	26	989	593
hsa-miR-1226-5p	ENSG00000237070	ENST00000451240.1	AC005550.2	154	-26.6	154	-26.6	7598	26	3743	2917
hsa-miR-1226-5p	ENSG00000122548	ENST00000242109.6	KIAA0087	142	-20.84	142	-20.84	7624	26	4354	2221
hsa-miR-1226-5p	ENSG00000233760	ENST00000780909.1	AC004947.1	142	-24.53	142	-24.53	7625	26	1746	776
hsa-miR-1226-5p	ENSG00000233760	ENST00000780912.1	AC004947.1	143	-26.2	143	-26.2	7626	26	1773	1148
hsa-miR-1226-5p	ENSG00000229591	ENST00000424630.1	AC006017.1	144	-23.78	144	-23.78	7638	26	673	106
hsa-miR-1226-5p	ENSG00000229591	ENST00000847087.1	AC006017.1	144	-23.78	144	-23.78	7639	26	853	599
hsa-miR-1226-5p	ENSG00000272502	ENST00000605955.1	AC104958.2	169	-34.99	169	-34.99	7657	26	1141	221
hsa-miR-1226-5p	ENSG00000272043	ENST00000607393.3	AC016405.2	293	-66.13	147	-35.22	7658	26	1018	65	4
hsa-miR-1226-5p	ENSG00000261655	ENST00000562459.1	AC100803.2	170	-38.65	170	-38.65	7659	26	1963	78
hsa-miR-1226-5p	ENSG00000260677	ENST00000562653.1	AL445531.1	143	-25.44	143	-25.44	7660	26	1728	887
hsa-miR-1226-5p	ENSG00000242288	ENST00000399449.3	AC022400.3	143	-22.37	143	-22.37	7673	26	3810	2912
hsa-miR-1226-5p	ENSG00000237523	ENST00000819792.1	LINC00857	140	-20.45	140	-20.45	7685	26	1531	1319
hsa-miR-1226-5p	ENSG00000269609	ENST00000598368.2	RPARP-AS1	149	-23.35	149	-23.35	7710	26	2458	1252
hsa-miR-1226-5p	ENSG00000255367	ENST00000717869.1	AC127526.2	144	-22.22	144	-22.22	7769	26	1836	99
hsa-miR-1226-5p	ENSG00000255367	ENST00000717887.1	AC127526.2	151	-34.12	151	-34.12	7794	26	1115	743
hsa-miR-1226-5p	ENSG00000255367	ENST00000717888.1	AC127526.2	140	-31.76	140	-31.76	7795	26	596	353
hsa-miR-1226-5p	ENSG00000255367	ENST00000717891.1	AC127526.2	140	-31.76	140	-31.76	7798	26	699	380
hsa-miR-1226-5p	ENSG00000257660	ENST00000803325.1	AC117498.2	146	-27.01	146	-27.01	7840	26	451	2
hsa-miR-1226-5p	ENSG00000257660	ENST00000549864.2	AC117498.2	294	-64	148	-34.26	7842	26	963	503	288
hsa-miR-1226-5p	ENSG00000257660	ENST00000803326.1	AC117498.2	439	-95.04	148	-34.26	7843	26	1227	473	258	548
hsa-miR-1226-5p	ENSG00000257660	ENST00000803329.1	AC117498.2	148	-34.26	148	-34.26	7846	26	514	143
hsa-miR-1226-5p	ENSG00000257660	ENST00000803328.1	AC117498.2	148	-34.26	148	-34.26	7847	26	587	117
hsa-miR-1226-5p	ENSG00000255970	ENST00000835137.1	LINC02421	140	-24.29	140	-24.29	7851	26	841	213
hsa-miR-1226-5p	ENSG00000255970	ENST00000542219.1	LINC02421	440	-70.06	150	-24.29	7852	26	3135	2	2211	1405
hsa-miR-1226-5p	ENSG00000241388	ENST00000537361.2	HNF1A-AS1	146	-27.4	146	-27.4	7865	26	687	378
hsa-miR-1226-5p	ENSG00000241388	ENST00000539163.1	HNF1A-AS1	162	-25.72	162	-25.72	7866	26	2455	1624
hsa-miR-1226-5p	ENSG00000276476	ENST00000721766.1	LINC00540	292	-62.01	147	-35.68	7869	26	2227	990	703
hsa-miR-1226-5p	ENSG00000276476	ENST00000721759.1	LINC00540	283	-59.3	142	-30.29	7872	26	1488	1080	985
hsa-miR-1226-5p	ENSG00000276476	ENST00000721767.1	LINC00540	145	-26.33	145	-26.33	7877	26	1613	539
hsa-miR-1226-5p	ENSG00000276476	ENST00000721762.1	LINC00540	141	-30.29	141	-30.29	7878	26	1020	928
hsa-miR-1226-5p	ENSG00000276476	ENST00000721763.1	LINC00540	286	-56.62	145	-30.29	7879	26	1409	539	1317
hsa-miR-1226-5p	ENSG00000276476	ENST00000721760.1	LINC00540	283	-59.3	142	-30.29	7880	26	1501	1093	998
hsa-miR-1226-5p	ENSG00000276476	ENST00000721761.1	LINC00540	428	-85.63	145	-30.29	7883	26	1796	484	1388	1293
hsa-miR-1226-5p	ENSG00000276476	ENST00000721765.1	LINC00540	147	-40.46	147	-40.46	7884	26	396	49
hsa-miR-1226-5p	ENSG00000258548	ENST00000794994.1	LINC00645	143	-20.46	143	-20.46	7891	26	1148	36
hsa-miR-1226-5p	ENSG00000258548	ENST00000794993.1	LINC00645	143	-20.46	143	-20.46	7892	26	349	36
hsa-miR-1226-5p	ENSG00000259230	ENST00000716868.1	LINC02323	154	-44.27	154	-44.27	7907	26	1764	1452
hsa-miR-1226-5p	ENSG00000259230	ENST00000559946.1	LINC02323	154	-44.27	154	-44.27	7909	26	1603	1291
hsa-miR-1226-5p	ENSG00000259230	ENST00000716870.1	LINC02323	140	-37.76	140	-37.76	7911	26	1370	597
hsa-miR-1226-5p	ENSG00000259230	ENST00000766588.1	LINC02323	140	-37.76	140	-37.76	7913	26	1118	331
hsa-miR-1226-5p	ENSG00000259230	ENST00000766589.1	LINC02323	140	-37.76	140	-37.76	7914	26	787	229
hsa-miR-1226-5p	ENSG00000259230	ENST00000766592.1	LINC02323	140	-37.76	140	-37.76	7917	26	1029	471
hsa-miR-1226-5p	ENSG00000259230	ENST00000766593.1	LINC02323	140	-37.76	140	-37.76	7918	26	863	110
hsa-miR-1226-5p	ENSG00000259230	ENST00000766599.1	LINC02323	142	-33.03	142	-33.03	7924	26	1036	528
hsa-miR-1226-5p	ENSG00000259230	ENST00000766600.1	LINC02323	142	-33.03	142	-33.03	7925	26	920	412
hsa-miR-1226-5p	ENSG00000251533	ENST00000805819.1	LINC00605	142	-37.47	142	-37.47	7927	26	1387	233
hsa-miR-1226-5p	ENSG00000251533	ENST00000805824.1	LINC00605	142	-37.47	142	-37.47	7928	26	788	166
hsa-miR-1226-5p	ENSG00000251533	ENST00000805820.1	LINC00605	142	-37.47	142	-37.47	7929	26	1017	233
hsa-miR-1226-5p	ENSG00000251533	ENST00000805825.1	LINC00605	142	-37.47	142	-37.47	7934	26	1582	166
hsa-miR-1226-5p	ENSG00000251533	ENST00000805823.1	LINC00605	142	-37.47	142	-37.47	7935	26	1392	172
hsa-miR-1226-5p	ENSG00000251533	ENST00000805821.1	LINC00605	142	-37.47	142	-37.47	7936	26	1054	200
hsa-miR-1226-5p	ENSG00000251533	ENST00000805822.1	LINC00605	142	-37.47	142	-37.47	7937	26	891	200
hsa-miR-1226-5p	ENSG00000251533	ENST00000805818.1	LINC00605	142	-37.47	142	-37.47	7938	26	1085	35
hsa-miR-1226-5p	ENSG00000251533	ENST00000805817.1	LINC00605	142	-37.47	142	-37.47	7939	26	1344	124
hsa-miR-1226-5p	ENSG00000251533	ENST00000805816.1	LINC00605	296	-69.47	154	-37.47	7940	26	1738	311	823
hsa-miR-1226-5p	ENSG00000236914	ENST00000559232.2	LINC01852	147	-26.29	147	-26.29	7942	26	2200	742
hsa-miR-1226-5p	ENSG00000236914	ENST00000728309.1	LINC01852	147	-26.29	147	-26.29	7943	26	1960	727
hsa-miR-1226-5p	ENSG00000236914	ENST00000657585.2	LINC01852	147	-26.29	147	-26.29	7944	26	1645	848
hsa-miR-1226-5p	ENSG00000236914	ENST00000434223.3	LINC01852	147	-26.29	147	-26.29	7946	26	967	435
hsa-miR-1226-5p	ENSG00000236914	ENST00000560198.1	LINC01852	147	-26.29	147	-26.29	7947	26	942	711
hsa-miR-1226-5p	ENSG00000260740	ENST00000565137.1	AC026471.3	142	-23.87	142	-23.87	7949	26	578	496
hsa-miR-1226-5p	ENSG00000262294	ENST00000792825.1	AC129507.2	148	-32.4	148	-32.4	7950	26	1187	396
hsa-miR-1226-5p	ENSG00000262294	ENST00000717666.1	AC129507.2	293	-61.82	148	-32.4	7951	26	1972	1234	1137
hsa-miR-1226-5p	ENSG00000262294	ENST00000717667.1	AC129507.2	148	-32.4	148	-32.4	7953	26	1001	210
hsa-miR-1226-5p	ENSG00000262294	ENST00000571512.2	AC129507.2	148	-32.4	148	-32.4	7954	26	1612	821
hsa-miR-1226-5p	ENSG00000236377	ENST00000704359.1	AC084809.2	452	-78.5	159	-30.9	7962	26	1043	652	27	571
hsa-miR-1226-5p	ENSG00000236377	ENST00000435733.2	AC084809.2	731	-129.25	154	-30.09	7963	26	3024	1072	1	538	2894	2773
hsa-miR-1226-5p	ENSG00000236377	ENST00000704362.1	AC084809.2	303	-47.6	159	-23.84	7964	26	1050	688	607
hsa-miR-1226-5p	ENSG00000236377	ENST00000444464.2	AC084809.2	303	-47.6	159	-23.84	7965	26	1127	760	562
hsa-miR-1226-5p	ENSG00000266968	ENST00000590535.2	AC023421.1	140	-31.8	140	-31.8	7968	26	1785	904
hsa-miR-1226-5p	ENSG00000277837	ENST00000620778.1	AC090340.1	621	-130.63	175	-39	7969	26	4980	1767	3717	4449	870
hsa-miR-1226-5p	ENSG00000275763	ENST00000622985.1	C18orf65	151	-27.04	151	-27.04	7970	26	2076	620
hsa-miR-1226-5p	ENSG00000276980	ENST00000614781.1	AC008760.2	290	-65.58	150	-37.81	7971	26	1357	538	636
hsa-miR-1226-5p	ENSG00000267296	ENST00000718469.1	CEBPA-AS1	445	-85.08	162	-31.24	7974	26	1378	584	248	453
hsa-miR-1226-5p	ENSG00000267296	ENST00000718471.1	CEBPA-AS1	142	-29.18	142	-29.18	7976	26	967	226
hsa-miR-1226-5p	ENSG00000267296	ENST00000592982.3	CEBPA-AS1	445	-85.08	162	-31.24	7977	26	2201	940	604	809
hsa-miR-1226-5p	ENSG00000267296	ENST00000718472.1	CEBPA-AS1	142	-29.18	142	-29.18	7978	26	946	202
hsa-miR-1226-5p	ENSG00000235621	ENST00000669055.1	LINC00494	141	-25.03	141	-25.03	7982	26	1426	1146
hsa-miR-1226-5p	ENSG00000235621	ENST00000660785.1	LINC00494	150	-27	150	-27	7989	26	2630	1553
hsa-miR-1226-5p	ENSG00000235621	ENST00000692154.1	LINC00494	150	-27	150	-27	7991	26	2310	1221
hsa-miR-1226-5p	ENSG00000235621	ENST00000416742.5	LINC00494	150	-27	150	-27	7992	26	3544	1852
hsa-miR-1226-5p	ENSG00000235621	ENST00000655482.1	LINC00494	150	-27	150	-27	7994	26	3418	1719
hsa-miR-1226-5p	ENSG00000235621	ENST00000545181.5	LINC00494	150	-27	150	-27	7995	26	3343	1651
hsa-miR-1226-5p	ENSG00000235621	ENST00000433094.1	LINC00494	291	-52.03	150	-27	7996	26	3071	1379	129
hsa-miR-1226-5p	ENSG00000232079	ENST00000426534.2	LINC01697	319	-58.61	160	-30.64	8043	26	1764	578	609
hsa-miR-1226-5p	ENSG00000232079	ENST00000423808.3	LINC01697	140	-28.22	140	-28.22	8048	26	951	372
hsa-miR-1226-5p	ENSG00000232079	ENST00000436878.2	LINC01697	140	-28.22	140	-28.22	8049	26	1028	22
hsa-miR-1226-5p	ENSG00000232079	ENST00000609782.1	LINC01697	319	-58.61	160	-30.64	8051	26	763	635	666
hsa-miR-1226-5p	ENSG00000225431	ENST00000419628.2	LINC01671	147	-27.53	147	-27.53	8052	26	1811	435
hsa-miR-1226-5p	ENSG00000274225	ENST00000617205.2	AP001065.1	147	-25.72	147	-25.72	8053	26	1392	113
hsa-miR-1226-5p	ENSG00000249923	ENST00000506039.2	AC007663.2	291	-56.11	149	-33.05	8054	26	2513	2237	2155
hsa-miR-1226-5p	ENSG00000249923	ENST00000824279.1	AC007663.2	187	-36.59	187	-36.59	8055	26	2023	595
hsa-miR-1226-5p	ENSG00000249923	ENST00000824282.1	AC007663.2	187	-36.59	187	-36.59	8056	26	858	589
hsa-miR-1226-5p	ENSG00000249923	ENST00000824274.1	AC007663.2	187	-36.59	187	-36.59	8057	26	923	656
hsa-miR-1226-5p	ENSG00000249923	ENST00000824273.1	AC007663.2	187	-36.59	187	-36.59	8058	26	923	659
hsa-miR-1226-5p	ENSG00000249923	ENST00000824281.1	AC007663.2	147	-36.82	147	-36.82	8059	26	458	225
hsa-miR-1226-5p	ENSG00000249923	ENST00000824280.1	AC007663.2	147	-36.82	147	-36.82	8060	26	505	272
hsa-miR-1226-5p	ENSG00000249923	ENST00000824278.1	AC007663.2	147	-36.82	147	-36.82	8061	26	377	147
hsa-miR-1226-5p	ENSG00000249923	ENST00000824275.1	AC007663.2	302	-67.9	155	-36.82	8062	26	452	1	222
hsa-miR-1226-5p	ENSG00000249923	ENST00000824277.1	AC007663.2	294	-64.56	147	-36.82	8063	26	2255	1016	2027
hsa-miR-1226-5p	ENSG00000249923	ENST00000824276.1	AC007663.2	147	-36.82	147	-36.82	8064	26	1627	1401
hsa-miR-1226-5p	ENSG00000226328	ENST00000609284.3	NUP50-AS1	140	-24.82	140	-24.82	8068	26	1698	437
hsa-miR-1226-5p	ENSG00000236393	ENST00000738318.1	AC091806.1	149	-24.79	149	-24.79	8087	26	1912	29
hsa-miR-1226-5p	ENSG00000284377	ENST00000741838.1	AL589669.1	145	-27.04	145	-27.04	8100	26	1035	447
hsa-miR-5006-3p	ENSG00000284708	ENST00000642131.1	AL031731.1	295	-42.94	150	-25.41	8121	21	2094	266	349
hsa-miR-5006-3p	ENSG00000224259	ENST00000772305.1	LINC01133	146	-23.28	146	-23.28	8122	21	325	254
hsa-miR-5006-3p	ENSG00000224259	ENST00000772302.1	LINC01133	146	-23.28	146	-23.28	8123	21	564	235
hsa-miR-5006-3p	ENSG00000224259	ENST00000772303.1	LINC01133	146	-23.28	146	-23.28	8124	21	522	230
hsa-miR-5006-3p	ENSG00000224259	ENST00000772309.1	LINC01133	146	-23.28	146	-23.28	8125	21	471	400
hsa-miR-5006-3p	ENSG00000224259	ENST00000772301.1	LINC01133	146	-23.28	146	-23.28	8126	21	737	365
hsa-miR-5006-3p	ENSG00000224259	ENST00000772304.1	LINC01133	445	-64.06	153	-23.28	8127	21	1354	990	208	774
hsa-miR-5006-3p	ENSG00000260101	ENST00000561559.3	AC008074.3	145	-12.16	145	-12.16	8154	21	2599	2199
hsa-miR-5006-3p	ENSG00000260101	ENST00000789328.1	AC008074.3	145	-12.16	145	-12.16	8155	21	2163	1763
hsa-miR-5006-3p	ENSG00000228791	ENST00000629562.3	THRB-AS1	140	-18.52	140	-18.52	8197	21	2257	1436
hsa-miR-5006-3p	ENSG00000228791	ENST00000608893.6	THRB-AS1	145	-14.91	145	-14.91	8203	21	1416	547
hsa-miR-5006-3p	ENSG00000273033	ENST00000610128.2	LINC02035	292	-32.88	151	-17.75	8214	21	5476	2930	3466
hsa-miR-5006-3p	ENSG00000244300	ENST00000740166.1	GATA2-AS1	151	-19.64	151	-19.64	8218	21	1681	601
hsa-miR-5006-3p	ENSG00000244300	ENST00000740167.1	GATA2-AS1	151	-19.64	151	-19.64	8219	21	1604	529
hsa-miR-5006-3p	ENSG00000244300	ENST00000740168.1	GATA2-AS1	151	-19.64	151	-19.64	8225	21	1759	677
hsa-miR-5006-3p	ENSG00000244300	ENST00000740169.1	GATA2-AS1	151	-19.64	151	-19.64	8227	21	1667	654
hsa-miR-5006-3p	ENSG00000244300	ENST00000740176.1	GATA2-AS1	151	-19.64	151	-19.64	8230	21	1241	581
hsa-miR-5006-3p	ENSG00000243550	ENST00000749931.1	LINC01214	165	-26.32	165	-26.32	8240	21	431	81
hsa-miR-5006-3p	ENSG00000243550	ENST00000749929.1	LINC01214	165	-26.32	165	-26.32	8242	21	610	200
hsa-miR-5006-3p	ENSG00000243550	ENST00000749928.1	LINC01214	165	-26.32	165	-26.32	8243	21	846	218
hsa-miR-5006-3p	ENSG00000243550	ENST00000749927.1	LINC01214	165	-26.32	165	-26.32	8244	21	586	228
hsa-miR-5006-3p	ENSG00000243550	ENST00000749925.1	LINC01214	165	-26.32	165	-26.32	8245	21	426	52
hsa-miR-5006-3p	ENSG00000243550	ENST00000749926.1	LINC01214	165	-26.32	165	-26.32	8246	21	547	189
hsa-miR-5006-3p	ENSG00000243550	ENST00000749923.1	LINC01214	165	-26.32	165	-26.32	8248	21	425	75
hsa-miR-5006-3p	ENSG00000243550	ENST00000749922.1	LINC01214	165	-26.32	165	-26.32	8249	21	453	95
hsa-miR-5006-3p	ENSG00000243550	ENST00000749919.1	LINC01214	165	-26.32	165	-26.32	8252	21	432	58
hsa-miR-5006-3p	ENSG00000243550	ENST00000749918.1	LINC01214	165	-26.32	165	-26.32	8254	21	460	102
hsa-miR-5006-3p	ENSG00000243550	ENST00000471222.3	LINC01214	165	-26.32	165	-26.32	8257	21	522	165
hsa-miR-5006-3p	ENSG00000243550	ENST00000749932.1	LINC01214	165	-26.32	165	-26.32	8258	21	569	218
hsa-miR-5006-3p	ENSG00000243550	ENST00000716188.1	LINC01214	165	-26.32	165	-26.32	8259	21	569	204
hsa-miR-5006-3p	ENSG00000260918	ENST00000562284.1	AC107398.3	290	-35.83	149	-23.18	8272	21	7000	1129	4194
hsa-miR-5006-3p	ENSG00000261211	ENST00000563225.2	AL031123.2	426	-59.92	143	-24.25	8334	21	6640	3657	618	3738
hsa-miR-5006-3p	ENSG00000266680	ENST00000584934.1	AL135905.1	145	-30.38	145	-30.38	8348	21	1404	121
hsa-miR-5006-3p	ENSG00000234155	ENST00000840427.1	LINC02535	142	-12.31	142	-12.31	8350	21	1077	29
hsa-miR-5006-3p	ENSG00000234155	ENST00000840425.1	LINC02535	142	-12.31	142	-12.31	8353	21	726	13
hsa-miR-5006-3p	ENSG00000232316	ENST00000835061.1	LINC02518	143	-22.11	143	-22.11	8355	21	707	353
hsa-miR-5006-3p	ENSG00000232316	ENST00000835060.1	LINC02518	141	-19.61	141	-19.61	8356	21	587	234
hsa-miR-5006-3p	ENSG00000232316	ENST00000835062.1	LINC02518	149	-25.86	149	-25.86	8357	21	775	565
hsa-miR-5006-3p	ENSG00000232316	ENST00000421737.2	LINC02518	140	-22.75	140	-22.75	8365	21	936	342
hsa-miR-5006-3p	ENSG00000232316	ENST00000835254.1	LINC02518	286	-34.71	145	-19.18	8367	21	1115	116	396
hsa-miR-5006-3p	ENSG00000230943	ENST00000788889.1	LINC02541	306	-45.22	159	-24.23	8368	21	1451	579	707
hsa-miR-5006-3p	ENSG00000230943	ENST00000788910.1	LINC02541	306	-45.22	159	-24.23	8369	21	1600	729	857
hsa-miR-5006-3p	ENSG00000230943	ENST00000788883.1	LINC02541	453	-68.92	159	-24.23	8370	21	1417	546	36	674
hsa-miR-5006-3p	ENSG00000230943	ENST00000788912.1	LINC02541	306	-45.22	159	-24.23	8371	21	1646	776	904
hsa-miR-5006-3p	ENSG00000230943	ENST00000788911.1	LINC02541	306	-45.22	159	-24.23	8372	21	1480	780	908
hsa-miR-5006-3p	ENSG00000230943	ENST00000788915.1	LINC02541	306	-45.22	159	-24.23	8373	21	1497	628	756
hsa-miR-5006-3p	ENSG00000230943	ENST00000788913.1	LINC02541	306	-45.22	159	-24.23	8374	21	1590	721	849
hsa-miR-5006-3p	ENSG00000230943	ENST00000654213.2	LINC02541	306	-45.22	159	-24.23	8375	21	1707	838	966
hsa-miR-5006-3p	ENSG00000230943	ENST00000788903.1	LINC02541	306	-45.22	159	-24.23	8376	21	1474	605	733
hsa-miR-5006-3p	ENSG00000230943	ENST00000788902.1	LINC02541	306	-45.22	159	-24.23	8377	21	1610	741	869
hsa-miR-5006-3p	ENSG00000230943	ENST00000788900.1	LINC02541	306	-45.22	159	-24.23	8378	21	1483	614	742
hsa-miR-5006-3p	ENSG00000230943	ENST00000788899.1	LINC02541	306	-45.22	159	-24.23	8379	21	1627	758	886
hsa-miR-5006-3p	ENSG00000230943	ENST00000788898.1	LINC02541	306	-45.22	159	-24.23	8380	21	1665	796	924
hsa-miR-5006-3p	ENSG00000230943	ENST00000788886.1	LINC02541	453	-68.92	159	-24.23	8381	21	1208	339	17	467
hsa-miR-5006-3p	ENSG00000230943	ENST00000788885.1	LINC02541	453	-68.92	159	-24.23	8382	21	1504	635	24	763
hsa-miR-5006-3p	ENSG00000230943	ENST00000788901.1	LINC02541	306	-45.22	159	-24.23	8383	21	1534	668	796
hsa-miR-5006-3p	ENSG00000230943	ENST00000788887.1	LINC02541	453	-68.92	159	-24.23	8384	21	1438	572	11	700
hsa-miR-5006-3p	ENSG00000230943	ENST00000788884.1	LINC02541	453	-68.92	159	-24.23	8385	21	1429	563	35	691
hsa-miR-5006-3p	ENSG00000230943	ENST00000649523.1	LINC02541	306	-45.22	159	-24.23	8386	21	1879	1033	1161
hsa-miR-5006-3p	ENSG00000230943	ENST00000788888.1	LINC02541	453	-68.92	159	-24.23	8387	21	1264	592	32	720
hsa-miR-5006-3p	ENSG00000230943	ENST00000788897.1	LINC02541	306	-45.22	159	-24.23	8388	21	1286	617	745
hsa-miR-5006-3p	ENSG00000230943	ENST00000788908.1	LINC02541	306	-45.22	159	-24.23	8389	21	1160	815	943
hsa-miR-5006-3p	ENSG00000230943	ENST00000657627.1	LINC02541	159	-24.23	159	-24.23	8390	21	802	748
hsa-miR-5006-3p	ENSG00000230943	ENST00000788894.1	LINC02541	147	-23.7	147	-23.7	8395	21	470	24
hsa-miR-5006-3p	ENSG00000230943	ENST00000788891.1	LINC02541	147	-23.7	147	-23.7	8396	21	500	200
hsa-miR-5006-3p	ENSG00000230943	ENST00000788896.1	LINC02541	140	-16.65	140	-16.65	8402	21	416	1
hsa-miR-5006-3p	ENSG00000230943	ENST00000788893.1	LINC02541	147	-23.7	147	-23.7	8403	21	774	59
hsa-miR-5006-3p	ENSG00000230943	ENST00000788892.1	LINC02541	147	-23.7	147	-23.7	8404	21	882	200
hsa-miR-5006-3p	ENSG00000230943	ENST00000788890.1	LINC02541	147	-23.7	147	-23.7	8405	21	469	205
hsa-miR-5006-3p	ENSG00000230943	ENST00000788895.1	LINC02541	147	-23.7	147	-23.7	8407	21	472	14
hsa-miR-5006-3p	ENSG00000122548	ENST00000242109.6	KIAA0087	307	-45.31	164	-28.74	8436	21	4354	2636	3608
hsa-miR-5006-3p	ENSG00000233760	ENST00000667848.1	AC004947.1	143	-22.34	143	-22.34	8439	21	1465	894
hsa-miR-5006-3p	ENSG00000233760	ENST00000420912.2	AC004947.1	143	-22.34	143	-22.34	8440	21	2857	2293
hsa-miR-5006-3p	ENSG00000233760	ENST00000780911.1	AC004947.1	143	-22.34	143	-22.34	8442	21	1532	1028
hsa-miR-5006-3p	ENSG00000233760	ENST00000780910.1	AC004947.1	143	-22.34	143	-22.34	8444	21	1483	912
hsa-miR-5006-3p	ENSG00000233760	ENST00000653682.1	AC004947.1	143	-22.34	143	-22.34	8445	21	2669	2241
hsa-miR-5006-3p	ENSG00000229591	ENST00000847087.1	AC006017.1	140	-26.11	140	-26.11	8451	21	853	401
hsa-miR-5006-3p	ENSG00000254109	ENST00000792127.1	RBPMS-AS1	145	-20.99	145	-20.99	8457	21	1015	51
hsa-miR-5006-3p	ENSG00000272502	ENST00000605955.1	AC104958.2	165	-22.49	165	-22.49	8469	21	1141	448
hsa-miR-5006-3p	ENSG00000272043	ENST00000607393.3	AC016405.2	143	-12.24	143	-12.24	8470	21	1018	734
hsa-miR-5006-3p	ENSG00000261655	ENST00000562459.1	AC100803.2	144	-23.7	144	-23.7	8471	21	1963	1359
hsa-miR-5006-3p	ENSG00000242288	ENST00000399449.3	AC022400.3	144	-20.88	144	-20.88	8485	21	3810	3064
hsa-miR-5006-3p	ENSG00000237523	ENST00000819791.1	LINC00857	301	-34.25	152	-19.55	8486	21	1632	1164	1030
hsa-miR-5006-3p	ENSG00000237523	ENST00000819795.1	LINC00857	295	-34.66	152	-19.55	8489	21	1223	950	1052
hsa-miR-5006-3p	ENSG00000237523	ENST00000819793.1	LINC00857	152	-19.55	152	-19.55	8490	21	1167	946
hsa-miR-5006-3p	ENSG00000237523	ENST00000671081.2	LINC00857	149	-14.7	149	-14.7	8492	21	2474	815
hsa-miR-5006-3p	ENSG00000237523	ENST00000819794.1	LINC00857	301	-34.25	152	-19.55	8494	21	1166	945	811
hsa-miR-5006-3p	ENSG00000237523	ENST00000819799.1	LINC00857	149	-14.7	149	-14.7	8496	21	1161	793
hsa-miR-5006-3p	ENSG00000237523	ENST00000819792.1	LINC00857	152	-19.55	152	-19.55	8497	21	1531	670
hsa-miR-5006-3p	ENSG00000237523	ENST00000432308.1	LINC00857	149	-14.7	149	-14.7	8499	21	629	13
hsa-miR-5006-3p	ENSG00000269609	ENST00000755287.1	RPARP-AS1	146	-18.39	146	-18.39	8508	21	1549	230
hsa-miR-5006-3p	ENSG00000269609	ENST00000657934.2	RPARP-AS1	146	-18.39	146	-18.39	8509	21	1455	230
hsa-miR-5006-3p	ENSG00000255367	ENST00000717869.1	AC127526.2	311	-39.76	156	-21.38	8581	21	1836	936	554
hsa-miR-5006-3p	ENSG00000255367	ENST00000717870.1	AC127526.2	311	-39.76	156	-21.38	8582	21	1170	1111	652
hsa-miR-5006-3p	ENSG00000255367	ENST00000717893.1	AC127526.2	155	-18.41	155	-18.41	8613	21	1047	352
hsa-miR-5006-3p	ENSG00000255367	ENST00000717895.1	AC127526.2	300	-45.76	152	-24.83	8615	21	1048	420	754
hsa-miR-5006-3p	ENSG00000271327	ENST00000605595.1	AC010201.2	148	-18.47	148	-18.47	8666	21	1495	692
hsa-miR-5006-3p	ENSG00000241388	ENST00000701967.2	HNF1A-AS1	147	-24.46	147	-24.46	8670	21	434	101
hsa-miR-5006-3p	ENSG00000241388	ENST00000646404.1	HNF1A-AS1	147	-24.46	147	-24.46	8675	21	557	82
hsa-miR-5006-3p	ENSG00000241388	ENST00000433033.4	HNF1A-AS1	147	-24.46	147	-24.46	8679	21	737	101
hsa-miR-5006-3p	ENSG00000276476	ENST00000721755.1	LINC00540	141	-21.65	141	-21.65	8682	21	2390	1018
hsa-miR-5006-3p	ENSG00000276476	ENST00000721759.1	LINC00540	147	-15.22	147	-15.22	8684	21	1488	1276
hsa-miR-5006-3p	ENSG00000276476	ENST00000657205.1	LINC00540	141	-21.65	141	-21.65	8685	21	1145	1110
hsa-miR-5006-3p	ENSG00000276476	ENST00000721756.1	LINC00540	141	-21.65	141	-21.65	8686	21	1357	1315
hsa-miR-5006-3p	ENSG00000276476	ENST00000721757.1	LINC00540	141	-21.65	141	-21.65	8687	21	1255	1213
hsa-miR-5006-3p	ENSG00000276476	ENST00000721758.1	LINC00540	141	-21.65	141	-21.65	8688	21	1424	1387
hsa-miR-5006-3p	ENSG00000276476	ENST00000721760.1	LINC00540	147	-15.22	147	-15.22	8692	21	1501	1289
hsa-miR-5006-3p	ENSG00000276476	ENST00000690279.2	LINC00540	141	-21.65	141	-21.65	8693	21	2546	1174
hsa-miR-5006-3p	ENSG00000276476	ENST00000631321.1	LINC00540	141	-21.65	141	-21.65	8694	21	2412	946
hsa-miR-5006-3p	ENSG00000276476	ENST00000721761.1	LINC00540	147	-15.22	147	-15.22	8695	21	1796	1584
hsa-miR-5006-3p	ENSG00000276476	ENST00000659301.2	LINC00540	141	-21.65	141	-21.65	8697	21	2228	762
hsa-miR-5006-3p	ENSG00000276476	ENST00000655363.2	LINC00540	141	-21.65	141	-21.65	8699	21	2215	747
hsa-miR-5006-3p	ENSG00000276476	ENST00000616974.1	LINC00540	141	-21.65	141	-21.65	8700	21	2143	680
hsa-miR-5006-3p	ENSG00000276476	ENST00000658741.1	LINC00540	141	-21.65	141	-21.65	8701	21	2206	738
hsa-miR-5006-3p	ENSG00000276476	ENST00000656522.2	LINC00540	141	-21.65	141	-21.65	8702	21	628	586
hsa-miR-5006-3p	ENSG00000258548	ENST00000794994.1	LINC00645	160	-19.72	160	-19.72	8703	21	1148	1050
hsa-miR-5006-3p	ENSG00000251533	ENST00000805819.1	LINC00605	150	-29.77	150	-29.77	8739	21	1387	1241
hsa-miR-5006-3p	ENSG00000251533	ENST00000805824.1	LINC00605	150	-29.77	150	-29.77	8740	21	788	645
hsa-miR-5006-3p	ENSG00000251533	ENST00000805820.1	LINC00605	150	-29.77	150	-29.77	8741	21	1017	875
hsa-miR-5006-3p	ENSG00000251533	ENST00000514902.3	LINC00605	150	-29.77	150	-29.77	8742	21	1559	1418
hsa-miR-5006-3p	ENSG00000251533	ENST00000805829.1	LINC00605	150	-29.77	150	-29.77	8743	21	1722	1581
hsa-miR-5006-3p	ENSG00000251533	ENST00000805828.1	LINC00605	150	-29.77	150	-29.77	8744	21	695	554
hsa-miR-5006-3p	ENSG00000251533	ENST00000805827.1	LINC00605	150	-29.77	150	-29.77	8745	21	1124	983
hsa-miR-5006-3p	ENSG00000251533	ENST00000805825.1	LINC00605	150	-29.77	150	-29.77	8746	21	1582	1441
hsa-miR-5006-3p	ENSG00000251533	ENST00000805823.1	LINC00605	150	-29.77	150	-29.77	8747	21	1392	1251
hsa-miR-5006-3p	ENSG00000251533	ENST00000805821.1	LINC00605	150	-29.77	150	-29.77	8748	21	1054	913
hsa-miR-5006-3p	ENSG00000251533	ENST00000805822.1	LINC00605	150	-29.77	150	-29.77	8749	21	891	750
hsa-miR-5006-3p	ENSG00000251533	ENST00000805818.1	LINC00605	150	-29.77	150	-29.77	8750	21	1085	944
hsa-miR-5006-3p	ENSG00000251533	ENST00000805817.1	LINC00605	150	-29.77	150	-29.77	8751	21	1344	1203
hsa-miR-5006-3p	ENSG00000251533	ENST00000805816.1	LINC00605	290	-42.95	150	-29.77	8752	21	1738	1597	60
hsa-miR-5006-3p	ENSG00000251533	ENST00000805826.1	LINC00605	150	-29.77	150	-29.77	8753	21	1267	1129
hsa-miR-5006-3p	ENSG00000228133	ENST00000670164.1	AC099684.1	145	-17.92	145	-17.92	8768	21	1767	1655
hsa-miR-5006-3p	ENSG00000228133	ENST00000425277.1	AC099684.1	145	-17.92	145	-17.92	8769	21	1747	1595
hsa-miR-5006-3p	ENSG00000236377	ENST00000444464.2	AC084809.2	144	-20.78	144	-20.78	8777	21	1127	655
hsa-miR-5006-3p	ENSG00000262172	ENST00000576632.1	AC116025.2	146	-21.79	146	-21.79	8778	21	443	103
hsa-miR-5006-3p	ENSG00000266968	ENST00000590535.2	AC023421.1	143	-18.36	143	-18.36	8780	21	1785	830
hsa-miR-5006-3p	ENSG00000277837	ENST00000620778.1	AC090340.1	282	-49.75	142	-28.88	8781	21	4980	1624	4160
hsa-miR-5006-3p	ENSG00000275763	ENST00000622985.1	C18orf65	143	-15.44	143	-15.44	8782	21	2076	468
hsa-miR-5006-3p	ENSG00000276980	ENST00000614781.1	AC008760.2	148	-23.57	148	-23.57	8783	21	1357	1139
hsa-miR-5006-3p	ENSG00000277067	ENST00000782209.1	CU634019.1	152	-19.79	152	-19.79	8819	21	1161	860
hsa-miR-5006-3p	ENSG00000277067	ENST00000782238.1	CU634019.1	145	-16.6	145	-16.6	8821	21	2245	1165
hsa-miR-5006-3p	ENSG00000277067	ENST00000782211.1	CU634019.1	140	-13.02	140	-13.02	8847	21	638	489
hsa-miR-5006-3p	ENSG00000232079	ENST00000426534.2	LINC01697	140	-11.91	140	-11.91	8855	21	1764	1241
hsa-miR-5006-3p	ENSG00000249923	ENST00000506039.2	AC007663.2	152	-16.64	152	-16.64	8866	21	2513	1139
hsa-miR-5006-3p	ENSG00000249923	ENST00000824278.1	AC007663.2	145	-22.44	145	-22.44	8873	21	377	41
hsa-miR-5006-3p	ENSG00000249923	ENST00000824277.1	AC007663.2	151	-16.45	151	-16.45	8875	21	2255	1869
hsa-miR-5006-3p	ENSG00000249923	ENST00000824276.1	AC007663.2	151	-16.45	151	-16.45	8876	21	1627	1243
hsa-miR-5006-3p	ENSG00000236393	ENST00000452690.1	AC091806.1	140	-12.65	140	-12.65	8900	21	3000	833
hsa-miR-5006-3p	ENSG00000236393	ENST00000447570.2	AC091806.1	312	-39.32	157	-20.79	8901	21	1959	1274	1111
hsa-miR-5006-3p	ENSG00000284377	ENST00000741835.1	AL589669.1	282	-29.53	142	-15.93	8909	21	1404	1216	263
hsa-miR-5006-3p	ENSG00000284377	ENST00000639829.1	AL589669.1	282	-29.53	142	-15.93	8910	21	1506	1319	366
hsa-miR-5006-3p	ENSG00000284377	ENST00000701574.2	AL589669.1	142	-15.93	142	-15.93	8911	21	989	734
hsa-miR-5006-3p	ENSG00000284377	ENST00000741836.1	AL589669.1	282	-29.53	142	-15.93	8913	21	1176	922	351
hsa-miR-5006-3p	ENSG00000284377	ENST00000741837.1	AL589669.1	142	-15.93	142	-15.93	8914	21	905	653
hsa-miR-5006-3p	ENSG00000231535	ENST00000803190.1	LINC00278	146	-16.5	146	-16.5	8925	21	867	721
hsa-miR-3177-3p	ENSG00000282221	ENST00000633182.2	AC119427.1	142	-25.72	142	-25.72	8964	21	924	30
hsa-miR-3177-3p	ENSG00000225234	ENST00000453806.1	TRAPPC12-AS1	147	-16.96	147	-16.96	8965	21	908	202
hsa-miR-3177-3p	ENSG00000228791	ENST00000807236.1	THRB-AS1	140	-22.82	140	-22.82	9022	21	758	309
hsa-miR-3177-3p	ENSG00000228791	ENST00000807237.1	THRB-AS1	140	-22.82	140	-22.82	9023	21	801	296
hsa-miR-3177-3p	ENSG00000228791	ENST00000807238.1	THRB-AS1	140	-22.82	140	-22.82	9024	21	635	240
hsa-miR-3177-3p	ENSG00000228791	ENST00000807239.1	THRB-AS1	140	-22.82	140	-22.82	9025	21	575	236
hsa-miR-3177-3p	ENSG00000273033	ENST00000610128.2	LINC02035	153	-26.16	153	-26.16	9026	21	5476	4754
hsa-miR-3177-3p	ENSG00000273033	ENST00000809469.1	LINC02035	153	-26.16	153	-26.16	9027	21	1302	573
hsa-miR-3177-3p	ENSG00000244300	ENST00000740171.1	GATA2-AS1	142	-22.92	142	-22.92	9029	21	840	53
hsa-miR-3177-3p	ENSG00000243550	ENST00000716187.1	LINC01214	142	-23.56	142	-23.56	9068	21	933	172
hsa-miR-3177-3p	ENSG00000243550	ENST00000716190.1	LINC01214	142	-23.56	142	-23.56	9081	21	1090	170
hsa-miR-3177-3p	ENSG00000260918	ENST00000562284.1	AC107398.3	162	-27.69	162	-27.69	9084	21	7000	2816
hsa-miR-3177-3p	ENSG00000251442	ENST00000503259.6	LINC01094	140	-20.22	140	-20.22	9090	21	2560	2207
hsa-miR-3177-3p	ENSG00000251442	ENST00000514130.6	LINC01094	140	-20.22	140	-20.22	9103	21	2095	2071
hsa-miR-3177-3p	ENSG00000251442	ENST00000666953.1	LINC01094	140	-20.22	140	-20.22	9114	21	1846	1781
hsa-miR-3177-3p	ENSG00000285427	ENST00000535372.1	SOD2-OT1	154	-25.07	154	-25.07	9220	21	1718	1542
hsa-miR-3177-3p	ENSG00000255367	ENST00000717893.1	AC127526.2	148	-27.83	148	-27.83	9425	21	1047	933
hsa-miR-3177-3p	ENSG00000276476	ENST00000721759.1	LINC00540	142	-22.39	142	-22.39	9496	21	1488	771
hsa-miR-3177-3p	ENSG00000276476	ENST00000721758.1	LINC00540	143	-16.24	143	-16.24	9500	21	1424	625
hsa-miR-3177-3p	ENSG00000276476	ENST00000721762.1	LINC00540	142	-22.39	142	-22.39	9502	21	1020	714
hsa-miR-3177-3p	ENSG00000276476	ENST00000721763.1	LINC00540	142	-22.39	142	-22.39	9503	21	1409	1103
hsa-miR-3177-3p	ENSG00000276476	ENST00000721760.1	LINC00540	142	-22.39	142	-22.39	9504	21	1501	784
hsa-miR-3177-3p	ENSG00000276476	ENST00000690279.2	LINC00540	143	-16.24	143	-16.24	9505	21	2546	412
hsa-miR-3177-3p	ENSG00000276476	ENST00000721761.1	LINC00540	142	-22.39	142	-22.39	9507	21	1796	1079
hsa-miR-3177-3p	ENSG00000276476	ENST00000721765.1	LINC00540	155	-24.65	155	-24.65	9508	21	396	29
hsa-miR-3177-3p	ENSG00000262294	ENST00000792825.1	AC129507.2	140	-14.13	140	-14.13	9574	21	1187	1122
hsa-miR-3177-3p	ENSG00000262294	ENST00000572499.1	AC129507.2	140	-14.13	140	-14.13	9576	21	748	683
hsa-miR-3177-3p	ENSG00000262294	ENST00000717667.1	AC129507.2	140	-14.13	140	-14.13	9577	21	1001	936
hsa-miR-3177-3p	ENSG00000262294	ENST00000571512.2	AC129507.2	140	-14.13	140	-14.13	9578	21	1612	1547
hsa-miR-3177-3p	ENSG00000228133	ENST00000670164.1	AC099684.1	149	-19.97	149	-19.97	9580	21	1767	1379
hsa-miR-3177-3p	ENSG00000228133	ENST00000425277.1	AC099684.1	149	-19.97	149	-19.97	9581	21	1747	1319
hsa-miR-3177-3p	ENSG00000277837	ENST00000620778.1	AC090340.1	144	-25.51	144	-25.51	9593	21	4980	2894
hsa-miR-3177-3p	ENSG00000277067	ENST00000623394.4	CU634019.1	156	-30.14	156	-30.14	9625	21	1492	1053
hsa-miR-3177-3p	ENSG00000277067	ENST00000624310.2	CU634019.1	156	-30.14	156	-30.14	9640	21	1193	757
hsa-miR-3177-3p	ENSG00000277067	ENST00000782237.1	CU634019.1	156	-30.14	156	-30.14	9644	21	1033	811
hsa-miR-3177-3p	ENSG00000277067	ENST00000782236.1	CU634019.1	156	-30.14	156	-30.14	9653	21	1342	901
hsa-miR-3177-3p	ENSG00000225431	ENST00000419628.2	LINC01671	144	-15.92	144	-15.92	9676	21	1811	1090
hsa-miR-3177-3p	ENSG00000274225	ENST00000617205.2	AP001065.1	140	-25.9	140	-25.9	9677	21	1392	87
hsa-miR-3177-3p	ENSG00000236393	ENST00000447570.2	AC091806.1	142	-21.04	142	-21.04	9713	21	1959	858
hsa-miR-3177-3p	ENSG00000231535	ENST00000685199.2	LINC00278	145	-21.28	145	-21.28	9730	21	1912	455
hsa-miR-6740-3p	ENSG00000224259	ENST00000772304.1	LINC01133	142	-12.15	142	-12.15	9751	22	1354	929
hsa-miR-6740-3p	ENSG00000224259	ENST00000772286.1	LINC01133	151	-31.24	151	-31.24	9754	22	1273	443
hsa-miR-6740-3p	ENSG00000224259	ENST00000772287.1	LINC01133	151	-31.24	151	-31.24	9756	22	1325	568
hsa-miR-6740-3p	ENSG00000224259	ENST00000635112.2	LINC01133	155	-18.1	155	-18.1	9757	22	2363	1960
hsa-miR-6740-3p	ENSG00000224259	ENST00000657602.1	LINC01133	151	-31.24	151	-31.24	9759	22	1418	559
hsa-miR-6740-3p	ENSG00000224259	ENST00000423943.4	LINC01133	151	-31.24	151	-31.24	9760	22	1478	429
hsa-miR-6740-3p	ENSG00000224259	ENST00000443364.8	LINC01133	151	-31.24	151	-31.24	9764	22	1358	503
hsa-miR-6740-3p	ENSG00000224259	ENST00000772299.1	LINC01133	151	-31.24	151	-31.24	9770	22	1207	276
hsa-miR-6740-3p	ENSG00000224259	ENST00000772294.1	LINC01133	151	-31.24	151	-31.24	9775	22	741	221
hsa-miR-6740-3p	ENSG00000204792	ENST00000418204.2	LINC01291	141	-27.9	141	-27.9	9786	22	1619	384
hsa-miR-6740-3p	ENSG00000204792	ENST00000717897.1	LINC01291	143	-17.35	143	-17.35	9790	22	5575	3512
hsa-miR-6740-3p	ENSG00000204792	ENST00000435984.2	LINC01291	143	-17.35	143	-17.35	9791	22	5588	3525
hsa-miR-6740-3p	ENSG00000253559	ENST00000521819.2	OSGEPL1-AS1	143	-15.79	143	-15.79	9815	22	874	602
hsa-miR-6740-3p	ENSG00000253559	ENST00000523895.1	OSGEPL1-AS1	143	-15.79	143	-15.79	9816	22	567	524
hsa-miR-6740-3p	ENSG00000228791	ENST00000629562.3	THRB-AS1	147	-16.69	147	-16.69	9821	22	2257	609
hsa-miR-6740-3p	ENSG00000273033	ENST00000610128.2	LINC02035	284	-31.89	144	-20.84	9838	22	5476	308	183
hsa-miR-6740-3p	ENSG00000244300	ENST00000740166.1	GATA2-AS1	140	-9.88	140	-9.88	9842	22	1681	795
hsa-miR-6740-3p	ENSG00000244300	ENST00000740167.1	GATA2-AS1	140	-9.88	140	-9.88	9843	22	1604	723
hsa-miR-6740-3p	ENSG00000244300	ENST00000740168.1	GATA2-AS1	140	-9.88	140	-9.88	9849	22	1759	871
hsa-miR-6740-3p	ENSG00000244300	ENST00000740169.1	GATA2-AS1	140	-9.88	140	-9.88	9851	22	1667	848
hsa-miR-6740-3p	ENSG00000244300	ENST00000740176.1	GATA2-AS1	140	-9.88	140	-9.88	9854	22	1241	775
hsa-miR-6740-3p	ENSG00000243550	ENST00000692847.3	LINC01214	140	-11.02	140	-11.02	9884	22	2194	595
hsa-miR-6740-3p	ENSG00000251442	ENST00000671622.2	LINC01094	141	-16.66	141	-16.66	9900	22	2989	2589
hsa-miR-6740-3p	ENSG00000251442	ENST00000663250.2	LINC01094	141	-16.66	141	-16.66	9911	22	2383	1983
hsa-miR-6740-3p	ENSG00000251442	ENST00000778523.1	LINC01094	145	-25.27	145	-25.27	9921	22	2647	1969
hsa-miR-6740-3p	ENSG00000251442	ENST00000778519.1	LINC01094	140	-10.63	140	-10.63	9924	22	1153	543
hsa-miR-6740-3p	ENSG00000284968	ENST00000508280.6	AC093827.4	145	-11.97	145	-11.97	9940	22	2158	1154
hsa-miR-6740-3p	ENSG00000284968	ENST00000503159.1	AC093827.4	147	-24.88	147	-24.88	9943	22	572	346
hsa-miR-6740-3p	ENSG00000250978	ENST00000515184.2	AC079467.1	283	-20.31	142	-11.74	9946	22	2570	2225	1950
hsa-miR-6740-3p	ENSG00000250978	ENST00000508512.5	AC079467.1	140	-14.23	140	-14.23	9947	22	503	341
hsa-miR-6740-3p	ENSG00000261211	ENST00000563225.2	AL031123.2	152	-23.93	152	-23.93	9958	22	6640	801
hsa-miR-6740-3p	ENSG00000285216	ENST00000790388.1	AL355499.2	142	-11.02	142	-11.02	9961	22	1377	934
hsa-miR-6740-3p	ENSG00000285216	ENST00000790389.1	AL355499.2	142	-11.02	142	-11.02	9964	22	1518	1075
hsa-miR-6740-3p	ENSG00000285216	ENST00000790390.1	AL355499.2	142	-11.02	142	-11.02	9965	22	1335	897
hsa-miR-6740-3p	ENSG00000234155	ENST00000840426.1	LINC02535	140	-14.65	140	-14.65	9975	22	2606	12
hsa-miR-6740-3p	ENSG00000234155	ENST00000455071.2	LINC02535	140	-14.65	140	-14.65	9976	22	2576	55
hsa-miR-6740-3p	ENSG00000232316	ENST00000835062.1	LINC02518	153	-24.86	153	-24.86	9981	22	775	433
hsa-miR-6740-3p	ENSG00000230943	ENST00000788889.1	LINC02541	140	-12.26	140	-12.26	9992	22	1451	196
hsa-miR-6740-3p	ENSG00000230943	ENST00000788910.1	LINC02541	140	-12.26	140	-12.26	9993	22	1600	397
hsa-miR-6740-3p	ENSG00000230943	ENST00000788883.1	LINC02541	140	-12.26	140	-12.26	9994	22	1417	214
hsa-miR-6740-3p	ENSG00000230943	ENST00000788912.1	LINC02541	140	-12.26	140	-12.26	9995	22	1646	361
hsa-miR-6740-3p	ENSG00000230943	ENST00000788911.1	LINC02541	140	-12.26	140	-12.26	9996	22	1480	397
hsa-miR-6740-3p	ENSG00000230943	ENST00000788915.1	LINC02541	140	-12.26	140	-12.26	9997	22	1497	279
hsa-miR-6740-3p	ENSG00000230943	ENST00000788913.1	LINC02541	140	-12.26	140	-12.26	9998	22	1590	338
hsa-miR-6740-3p	ENSG00000230943	ENST00000654213.2	LINC02541	140	-12.26	140	-12.26	9999	22	1707	372
hsa-miR-6740-3p	ENSG00000230943	ENST00000788903.1	LINC02541	140	-12.26	140	-12.26	10000	22	1474	256
hsa-miR-6740-3p	ENSG00000230943	ENST00000788902.1	LINC02541	140	-12.26	140	-12.26	10001	22	1610	275
hsa-miR-6740-3p	ENSG00000230943	ENST00000788900.1	LINC02541	140	-12.26	140	-12.26	10002	22	1483	282
hsa-miR-6740-3p	ENSG00000230943	ENST00000788899.1	LINC02541	140	-12.26	140	-12.26	10003	22	1627	287
hsa-miR-6740-3p	ENSG00000230943	ENST00000788898.1	LINC02541	140	-12.26	140	-12.26	10004	22	1665	326
hsa-miR-6740-3p	ENSG00000230943	ENST00000788885.1	LINC02541	140	-12.26	140	-12.26	10006	22	1504	169
hsa-miR-6740-3p	ENSG00000230943	ENST00000788901.1	LINC02541	140	-12.26	140	-12.26	10007	22	1534	285
hsa-miR-6740-3p	ENSG00000230943	ENST00000788887.1	LINC02541	140	-12.26	140	-12.26	10008	22	1438	189
hsa-miR-6740-3p	ENSG00000230943	ENST00000788884.1	LINC02541	140	-12.26	140	-12.26	10009	22	1429	180
hsa-miR-6740-3p	ENSG00000230943	ENST00000649523.1	LINC02541	140	-12.26	140	-12.26	10010	22	1879	618
hsa-miR-6740-3p	ENSG00000230943	ENST00000788888.1	LINC02541	140	-12.26	140	-12.26	10011	22	1264	177
hsa-miR-6740-3p	ENSG00000230943	ENST00000788897.1	LINC02541	140	-12.26	140	-12.26	10012	22	1286	285
hsa-miR-6740-3p	ENSG00000230943	ENST00000788908.1	LINC02541	140	-12.26	140	-12.26	10013	22	1160	296
hsa-miR-6740-3p	ENSG00000230943	ENST00000657627.1	LINC02541	140	-12.26	140	-12.26	10014	22	802	321
hsa-miR-6740-3p	ENSG00000230943	ENST00000427157.1	LINC02541	140	-12.26	140	-12.26	10015	22	327	184
hsa-miR-6740-3p	ENSG00000230943	ENST00000452675.3	LINC02541	140	-12.26	140	-12.26	10016	22	621	497
hsa-miR-6740-3p	ENSG00000230943	ENST00000788909.1	LINC02541	140	-12.26	140	-12.26	10017	22	515	391
hsa-miR-6740-3p	ENSG00000230943	ENST00000701104.2	LINC02541	140	-12.26	140	-12.26	10018	22	780	656
hsa-miR-6740-3p	ENSG00000230943	ENST00000788894.1	LINC02541	140	-12.26	140	-12.26	10019	22	470	346
hsa-miR-6740-3p	ENSG00000230943	ENST00000788891.1	LINC02541	140	-12.26	140	-12.26	10020	22	500	378
hsa-miR-6740-3p	ENSG00000230943	ENST00000788916.1	LINC02541	140	-12.26	140	-12.26	10021	22	562	443
hsa-miR-6740-3p	ENSG00000230943	ENST00000788914.1	LINC02541	140	-12.26	140	-12.26	10022	22	493	374
hsa-miR-6740-3p	ENSG00000230943	ENST00000788906.1	LINC02541	140	-12.26	140	-12.26	10023	22	439	320
hsa-miR-6740-3p	ENSG00000230943	ENST00000788905.1	LINC02541	140	-12.26	140	-12.26	10024	22	413	294
hsa-miR-6740-3p	ENSG00000230943	ENST00000788904.1	LINC02541	140	-12.26	140	-12.26	10025	22	573	454
hsa-miR-6740-3p	ENSG00000230943	ENST00000788896.1	LINC02541	140	-12.26	140	-12.26	10026	22	416	297
hsa-miR-6740-3p	ENSG00000230943	ENST00000788893.1	LINC02541	140	-12.26	140	-12.26	10027	22	774	655
hsa-miR-6740-3p	ENSG00000230943	ENST00000788892.1	LINC02541	140	-12.26	140	-12.26	10028	22	882	763
hsa-miR-6740-3p	ENSG00000230943	ENST00000788890.1	LINC02541	140	-12.26	140	-12.26	10029	22	469	350
hsa-miR-6740-3p	ENSG00000230943	ENST00000788907.1	LINC02541	140	-12.26	140	-12.26	10030	22	989	873
hsa-miR-6740-3p	ENSG00000230943	ENST00000788895.1	LINC02541	140	-12.26	140	-12.26	10031	22	472	356
hsa-miR-6740-3p	ENSG00000227719	ENST00000449931.1	AC006042.1	152	-24.82	152	-24.82	10033	22	524	15
hsa-miR-6740-3p	ENSG00000237070	ENST00000451240.1	AC005550.2	148	-10.97	148	-10.97	10034	22	3743	236
hsa-miR-6740-3p	ENSG00000233760	ENST00000780909.1	AC004947.1	159	-11.54	159	-11.54	10061	22	1746	1329
hsa-miR-6740-3p	ENSG00000233760	ENST00000780912.1	AC004947.1	147	-24.91	147	-24.91	10062	22	1773	769
hsa-miR-6740-3p	ENSG00000233760	ENST00000667848.1	AC004947.1	159	-11.54	159	-11.54	10063	22	1465	572
hsa-miR-6740-3p	ENSG00000233760	ENST00000420912.2	AC004947.1	159	-11.54	159	-11.54	10064	22	2857	725
hsa-miR-6740-3p	ENSG00000233760	ENST00000457000.2	AC004947.1	159	-11.54	159	-11.54	10065	22	1431	706
hsa-miR-6740-3p	ENSG00000233760	ENST00000780911.1	AC004947.1	159	-11.54	159	-11.54	10066	22	1532	706
hsa-miR-6740-3p	ENSG00000233760	ENST00000654600.2	AC004947.1	159	-11.54	159	-11.54	10067	22	1405	599
hsa-miR-6740-3p	ENSG00000233760	ENST00000780910.1	AC004947.1	159	-11.54	159	-11.54	10068	22	1483	590
hsa-miR-6740-3p	ENSG00000233760	ENST00000653682.1	AC004947.1	159	-11.54	159	-11.54	10069	22	2669	673
hsa-miR-6740-3p	ENSG00000233760	ENST00000660447.1	AC004947.1	303	-30.1	159	-18.56	10070	22	1293	651	925
hsa-miR-6740-3p	ENSG00000233760	ENST00000430426.3	AC004947.1	159	-11.54	159	-11.54	10071	22	841	424
hsa-miR-6740-3p	ENSG00000260677	ENST00000562653.1	AL445531.1	159	-17.27	159	-17.27	10096	22	1728	530
hsa-miR-6740-3p	ENSG00000227121	ENST00000668157.1	AC073174.1	140	-17.13	140	-17.13	10103	22	1613	80
hsa-miR-6740-3p	ENSG00000227121	ENST00000654808.1	AC073174.1	140	-17.13	140	-17.13	10104	22	1540	80
hsa-miR-6740-3p	ENSG00000227121	ENST00000765539.1	AC073174.1	140	-17.13	140	-17.13	10107	22	1078	172
hsa-miR-6740-3p	ENSG00000227121	ENST00000765540.1	AC073174.1	140	-17.13	140	-17.13	10108	22	1091	168
hsa-miR-6740-3p	ENSG00000242288	ENST00000399449.3	AC022400.3	141	-11.57	141	-11.57	10109	22	3810	634
hsa-miR-6740-3p	ENSG00000237523	ENST00000660450.2	LINC00857	282	-30.8	142	-15.48	10111	22	2499	2333	1091
hsa-miR-6740-3p	ENSG00000237523	ENST00000819796.1	LINC00857	142	-15.48	142	-15.48	10112	22	1199	1033
hsa-miR-6740-3p	ENSG00000237523	ENST00000671081.2	LINC00857	424	-52.75	142	-21.95	10116	22	2474	824	2308	1066
hsa-miR-6740-3p	ENSG00000237523	ENST00000819797.1	LINC00857	282	-30.8	142	-15.48	10117	22	861	695	316
hsa-miR-6740-3p	ENSG00000237523	ENST00000819798.1	LINC00857	282	-30.8	142	-15.48	10119	22	2088	1922	680
hsa-miR-6740-3p	ENSG00000237523	ENST00000819799.1	LINC00857	284	-37.43	142	-21.95	10120	22	1161	802	994
hsa-miR-6740-3p	ENSG00000237523	ENST00000422847.1	LINC00857	282	-30.8	142	-15.48	10122	22	2161	1995	753
hsa-miR-6740-3p	ENSG00000237523	ENST00000432308.1	LINC00857	282	-37.27	142	-21.95	10123	22	629	22	264
hsa-miR-6740-3p	ENSG00000269609	ENST00000597488.1	RPARP-AS1	142	-19.02	142	-19.02	10145	22	1938	1760
hsa-miR-6740-3p	ENSG00000269609	ENST00000598368.2	RPARP-AS1	147	-23.79	147	-23.79	10146	22	2458	982
hsa-miR-6740-3p	ENSG00000255367	ENST00000717868.1	AC127526.2	142	-19.95	142	-19.95	10204	22	604	273
hsa-miR-6740-3p	ENSG00000255367	ENST00000717869.1	AC127526.2	142	-19.95	142	-19.95	10205	22	1836	41
hsa-miR-6740-3p	ENSG00000255367	ENST00000717870.1	AC127526.2	142	-19.95	142	-19.95	10206	22	1170	238
hsa-miR-6740-3p	ENSG00000255367	ENST00000717871.1	AC127526.2	142	-19.95	142	-19.95	10207	22	900	272
hsa-miR-6740-3p	ENSG00000255367	ENST00000717872.1	AC127526.2	142	-19.95	142	-19.95	10208	22	700	260
hsa-miR-6740-3p	ENSG00000255367	ENST00000659225.2	AC127526.2	141	-13.57	141	-13.57	10209	22	1247	345
hsa-miR-6740-3p	ENSG00000255367	ENST00000717873.1	AC127526.2	283	-33.52	142	-19.95	10210	22	1212	223	649
hsa-miR-6740-3p	ENSG00000255367	ENST00000710269.1	AC127526.2	141	-13.57	141	-13.57	10211	22	956	552
hsa-miR-6740-3p	ENSG00000255367	ENST00000717874.1	AC127526.2	283	-33.52	142	-19.95	10212	22	1252	286	848
hsa-miR-6740-3p	ENSG00000255367	ENST00000717875.1	AC127526.2	281	-32.18	141	-18.61	10213	22	641	369	71
hsa-miR-6740-3p	ENSG00000255367	ENST00000717876.1	AC127526.2	141	-13.57	141	-13.57	10214	22	986	714
hsa-miR-6740-3p	ENSG00000255367	ENST00000717877.1	AC127526.2	283	-33.52	142	-19.95	10215	22	710	60	438
hsa-miR-6740-3p	ENSG00000255367	ENST00000717878.1	AC127526.2	283	-33.52	142	-19.95	10216	22	800	286	528
hsa-miR-6740-3p	ENSG00000255367	ENST00000717879.1	AC127526.2	141	-13.57	141	-13.57	10217	22	919	649
hsa-miR-6740-3p	ENSG00000255367	ENST00000527970.1	AC127526.2	142	-19.95	142	-19.95	10218	22	983	235
hsa-miR-6740-3p	ENSG00000255367	ENST00000717880.1	AC127526.2	142	-19.95	142	-19.95	10219	22	715	238
hsa-miR-6740-3p	ENSG00000255367	ENST00000717881.1	AC127526.2	152	-17.65	152	-17.65	10220	22	2910	2031
hsa-miR-6740-3p	ENSG00000255367	ENST00000822353.1	AC127526.2	142	-19.95	142	-19.95	10221	22	463	260
hsa-miR-6740-3p	ENSG00000255367	ENST00000717882.1	AC127526.2	142	-19.95	142	-19.95	10222	22	590	229
hsa-miR-6740-3p	ENSG00000255367	ENST00000822354.1	AC127526.2	142	-19.95	142	-19.95	10223	22	1060	305
hsa-miR-6740-3p	ENSG00000255367	ENST00000717883.1	AC127526.2	142	-19.95	142	-19.95	10226	22	722	290
hsa-miR-6740-3p	ENSG00000255367	ENST00000717885.1	AC127526.2	142	-19.95	142	-19.95	10228	22	843	238
hsa-miR-6740-3p	ENSG00000255367	ENST00000717887.1	AC127526.2	142	-19.95	142	-19.95	10230	22	1115	271
hsa-miR-6740-3p	ENSG00000255367	ENST00000717888.1	AC127526.2	142	-19.95	142	-19.95	10231	22	596	243
hsa-miR-6740-3p	ENSG00000255367	ENST00000717890.1	AC127526.2	142	-19.95	142	-19.95	10233	22	473	244
hsa-miR-6740-3p	ENSG00000255367	ENST00000717891.1	AC127526.2	142	-19.95	142	-19.95	10234	22	699	270
hsa-miR-6740-3p	ENSG00000255367	ENST00000717892.1	AC127526.2	142	-19.95	142	-19.95	10235	22	611	244
hsa-miR-6740-3p	ENSG00000255367	ENST00000822356.1	AC127526.2	142	-19.95	142	-19.95	10236	22	634	274
hsa-miR-6740-3p	ENSG00000255367	ENST00000717893.1	AC127526.2	142	-19.95	142	-19.95	10237	22	1047	315
hsa-miR-6740-3p	ENSG00000255367	ENST00000717894.1	AC127526.2	142	-19.95	142	-19.95	10238	22	656	275
hsa-miR-6740-3p	ENSG00000255367	ENST00000717895.1	AC127526.2	142	-19.95	142	-19.95	10239	22	1048	274
hsa-miR-6740-3p	ENSG00000255367	ENST00000717896.1	AC127526.2	142	-19.95	142	-19.95	10240	22	561	238
hsa-miR-6740-3p	ENSG00000257052	ENST00000751147.1	AP003721.4	149	-13.91	149	-13.91	10241	22	1507	855
hsa-miR-6740-3p	ENSG00000257052	ENST00000544421.2	AP003721.4	149	-13.91	149	-13.91	10242	22	1362	709
hsa-miR-6740-3p	ENSG00000257052	ENST00000751148.1	AP003721.4	149	-13.91	149	-13.91	10243	22	853	201
hsa-miR-6740-3p	ENSG00000255970	ENST00000542219.1	LINC02421	151	-27.35	151	-27.35	10288	22	3135	2241
hsa-miR-6740-3p	ENSG00000241388	ENST00000760046.1	HNF1A-AS1	292	-26.23	146	-13.34	10291	22	630	469	529
hsa-miR-6740-3p	ENSG00000241388	ENST00000619441.2	HNF1A-AS1	292	-26.23	146	-13.34	10292	22	514	354	414
hsa-miR-6740-3p	ENSG00000276476	ENST00000721755.1	LINC00540	144	-19.53	144	-19.53	10306	22	2390	803
hsa-miR-6740-3p	ENSG00000276476	ENST00000721759.1	LINC00540	141	-20.66	141	-20.66	10308	22	1488	591
hsa-miR-6740-3p	ENSG00000276476	ENST00000657205.1	LINC00540	144	-19.53	144	-19.53	10309	22	1145	895
hsa-miR-6740-3p	ENSG00000276476	ENST00000721756.1	LINC00540	144	-19.53	144	-19.53	10310	22	1357	1100
hsa-miR-6740-3p	ENSG00000276476	ENST00000721757.1	LINC00540	144	-19.53	144	-19.53	10311	22	1255	998
hsa-miR-6740-3p	ENSG00000276476	ENST00000721758.1	LINC00540	144	-19.53	144	-19.53	10312	22	1424	1172
hsa-miR-6740-3p	ENSG00000276476	ENST00000721762.1	LINC00540	141	-20.66	141	-20.66	10314	22	1020	534
hsa-miR-6740-3p	ENSG00000276476	ENST00000721763.1	LINC00540	141	-20.66	141	-20.66	10315	22	1409	923
hsa-miR-6740-3p	ENSG00000276476	ENST00000690279.2	LINC00540	144	-19.53	144	-19.53	10317	22	2546	959
hsa-miR-6740-3p	ENSG00000276476	ENST00000631321.1	LINC00540	144	-19.53	144	-19.53	10318	22	2412	731
hsa-miR-6740-3p	ENSG00000276476	ENST00000659301.2	LINC00540	144	-19.53	144	-19.53	10321	22	2228	547
hsa-miR-6740-3p	ENSG00000276476	ENST00000611481.1	LINC00540	144	-19.53	144	-19.53	10322	22	588	486
hsa-miR-6740-3p	ENSG00000276476	ENST00000655363.2	LINC00540	144	-19.53	144	-19.53	10323	22	2215	532
hsa-miR-6740-3p	ENSG00000276476	ENST00000616974.1	LINC00540	144	-19.53	144	-19.53	10324	22	2143	465
hsa-miR-6740-3p	ENSG00000276476	ENST00000658741.1	LINC00540	144	-19.53	144	-19.53	10325	22	2206	523
hsa-miR-6740-3p	ENSG00000276476	ENST00000656522.2	LINC00540	144	-19.53	144	-19.53	10326	22	628	371
hsa-miR-6740-3p	ENSG00000235269	ENST00000728987.1	LINC02331	142	-8.08	142	-8.08	10336	22	2327	1037
hsa-miR-6740-3p	ENSG00000235269	ENST00000728988.1	LINC02331	142	-8.08	142	-8.08	10337	22	2086	916
hsa-miR-6740-3p	ENSG00000235269	ENST00000418927.3	LINC02331	142	-8.08	142	-8.08	10338	22	2316	1157
hsa-miR-6740-3p	ENSG00000235269	ENST00000728989.1	LINC02331	142	-8.08	142	-8.08	10339	22	1833	1336
hsa-miR-6740-3p	ENSG00000251533	ENST00000805816.1	LINC00605	140	-21.21	140	-21.21	10376	22	1738	382
hsa-miR-6740-3p	ENSG00000236914	ENST00000559232.2	LINC01852	154	-13.24	154	-13.24	10378	22	2200	1075
hsa-miR-6740-3p	ENSG00000236914	ENST00000728309.1	LINC01852	154	-13.24	154	-13.24	10379	22	1960	1055
hsa-miR-6740-3p	ENSG00000266968	ENST00000590535.2	AC023421.1	142	-16.01	142	-16.01	10404	22	1785	683
hsa-miR-6740-3p	ENSG00000276980	ENST00000614781.1	AC008760.2	149	-32.17	149	-32.17	10407	22	1357	1135
hsa-miR-6740-3p	ENSG00000267296	ENST00000718467.1	CEBPA-AS1	156	-33.64	156	-33.64	10408	22	722	437
hsa-miR-6740-3p	ENSG00000267296	ENST00000718468.1	CEBPA-AS1	156	-33.64	156	-33.64	10409	22	796	506
hsa-miR-6740-3p	ENSG00000267296	ENST00000718469.1	CEBPA-AS1	296	-55.1	156	-33.64	10410	22	1378	1091	204
hsa-miR-6740-3p	ENSG00000267296	ENST00000718470.1	CEBPA-AS1	156	-33.64	156	-33.64	10411	22	1172	686
hsa-miR-6740-3p	ENSG00000267296	ENST00000718471.1	CEBPA-AS1	296	-55.1	156	-33.64	10412	22	967	681	182
hsa-miR-6740-3p	ENSG00000267296	ENST00000592982.3	CEBPA-AS1	438	-72.92	156	-33.64	10413	22	2201	1912	1048	560
hsa-miR-6740-3p	ENSG00000267296	ENST00000718472.1	CEBPA-AS1	296	-55.1	156	-33.64	10414	22	946	657	158
hsa-miR-6740-3p	ENSG00000235621	ENST00000670842.1	LINC00494	141	-14.94	141	-14.94	10421	22	1839	971
hsa-miR-6740-3p	ENSG00000277067	ENST00000621909.5	CU634019.1	140	-21.98	140	-21.98	10433	22	2464	95
hsa-miR-6740-3p	ENSG00000277067	ENST00000782242.1	CU634019.1	140	-21.98	140	-21.98	10434	22	1227	63
hsa-miR-6740-3p	ENSG00000277067	ENST00000782220.1	CU634019.1	140	-21.98	140	-21.98	10435	22	515	2
hsa-miR-6740-3p	ENSG00000277067	ENST00000782212.1	CU634019.1	140	-21.98	140	-21.98	10436	22	921	2
hsa-miR-6740-3p	ENSG00000277067	ENST00000782208.1	CU634019.1	140	-11.26	140	-11.26	10463	22	1114	764
hsa-miR-6740-3p	ENSG00000277067	ENST00000782210.1	CU634019.1	141	-20.39	141	-20.39	10468	22	630	427
hsa-miR-6740-3p	ENSG00000277067	ENST00000782247.1	CU634019.1	143	-18.2	143	-18.2	10469	22	981	146
hsa-miR-6740-3p	ENSG00000277067	ENST00000782241.1	CU634019.1	143	-18.2	143	-18.2	10474	22	1316	123
hsa-miR-6740-3p	ENSG00000249923	ENST00000824281.1	AC007663.2	153	-18.64	153	-18.64	10495	22	458	317
hsa-miR-6740-3p	ENSG00000249923	ENST00000824280.1	AC007663.2	153	-18.64	153	-18.64	10496	22	505	364
hsa-miR-6740-3p	ENSG00000249923	ENST00000824278.1	AC007663.2	153	-18.64	153	-18.64	10497	22	377	239
hsa-miR-6740-3p	ENSG00000249923	ENST00000824275.1	AC007663.2	153	-18.64	153	-18.64	10498	22	452	314
hsa-miR-6740-3p	ENSG00000249923	ENST00000824277.1	AC007663.2	302	-46.39	153	-27.75	10499	22	2255	2119	1649
hsa-miR-6740-3p	ENSG00000249923	ENST00000824276.1	AC007663.2	302	-46.39	153	-27.75	10500	22	1627	1493	1023
hsa-miR-6740-3p	ENSG00000236393	ENST00000452690.1	AC091806.1	141	-17.13	141	-17.13	10524	22	3000	947
hsa-miR-6740-3p	ENSG00000284377	ENST00000741835.1	AL589669.1	152	-23.55	152	-23.55	10533	22	1404	541
hsa-miR-6740-3p	ENSG00000284377	ENST00000639829.1	AL589669.1	152	-23.55	152	-23.55	10534	22	1506	644
hsa-miR-6740-3p	ENSG00000284377	ENST00000701574.2	AL589669.1	152	-23.55	152	-23.55	10535	22	989	441
hsa-miR-6740-3p	ENSG00000284377	ENST00000741836.1	AL589669.1	152	-23.55	152	-23.55	10537	22	1176	629
hsa-miR-6740-3p	ENSG00000284377	ENST00000741837.1	AL589669.1	152	-23.55	152	-23.55	10538	22	905	360
hsa-miR-6740-3p	ENSG00000231535	ENST00000655607.2	LINC00278	140	-9.36	140	-9.36	10540	22	826	448
hsa-miR-6740-3p	ENSG00000231535	ENST00000444263.6	LINC00278	140	-10.15	140	-10.15	10543	22	1209	313
hsa-miR-6740-3p	ENSG00000231535	ENST00000652068.1	LINC00278	140	-10.15	140	-10.15	10544	22	890	313
hsa-miR-6740-3p	ENSG00000231535	ENST00000651090.1	LINC00278	140	-9.36	140	-9.36	10545	22	1582	441
hsa-miR-6740-3p	ENSG00000231535	ENST00000803197.1	LINC00278	140	-9.36	140	-9.36	10547	22	1083	434
hsa-miR-6740-3p	ENSG00000231535	ENST00000691894.1	LINC00278	140	-9.36	140	-9.36	10548	22	749	434
hsa-miR-6740-3p	ENSG00000231535	ENST00000425031.2	LINC00278	140	-10.15	140	-10.15	10551	22	620	301
hsa-miR-6740-3p	ENSG00000231535	ENST00000803194.1	LINC00278	140	-9.36	140	-9.36	10553	22	808	423
hsa-miR-6740-3p	ENSG00000231535	ENST00000803195.1	LINC00278	140	-10.15	140	-10.15	10556	22	1633	198
hsa-miR-181a-3p	ENSG00000260918	ENST00000562284.1	AC107398.3	140	-10.33	140	-10.33	10708	22	7000	3609
hsa-miR-181a-3p	ENSG00000227719	ENST00000449931.1	AC006042.1	140	-14.29	140	-14.29	10845	22	524	332
hsa-miR-181a-3p	ENSG00000236039	ENST00000843694.1	AC019117.1	143	-19.96	143	-19.96	10870	22	289	36
hsa-miR-181a-3p	ENSG00000231535	ENST00000665487.1	LINC00278	147	-14.98	147	-14.98	11353	22	1341	318
hsa-miR-181a-3p	ENSG00000231535	ENST00000803190.1	LINC00278	143	-14.13	143	-14.13	11361	22	867	328
hsa-miR-1276	ENSG00000284708	ENST00000642131.1	AL031731.1	144	-16.51	144	-16.51	11369	20	2094	496
hsa-miR-1276	ENSG00000224259	ENST00000772304.1	LINC01133	150	-12.72	150	-12.72	11375	20	1354	643
hsa-miR-1276	ENSG00000228791	ENST00000630391.1	THRB-AS1	288	-36.06	147	-19.6	11456	20	1992	1247	1400
hsa-miR-1276	ENSG00000243550	ENST00000749941.1	LINC01214	142	-12.17	142	-12.17	11481	20	423	142
hsa-miR-1276	ENSG00000243550	ENST00000749939.1	LINC01214	142	-12.17	142	-12.17	11484	20	418	137
hsa-miR-1276	ENSG00000243550	ENST00000749925.1	LINC01214	142	-12.17	142	-12.17	11493	20	426	145
hsa-miR-1276	ENSG00000243550	ENST00000749920.1	LINC01214	142	-12.17	142	-12.17	11499	20	350	69
hsa-miR-1276	ENSG00000243550	ENST00000749919.1	LINC01214	142	-12.17	142	-12.17	11500	20	432	151
hsa-miR-1276	ENSG00000243550	ENST00000716188.1	LINC01214	142	-12.17	142	-12.17	11507	20	569	297
hsa-miR-1276	ENSG00000243550	ENST00000692847.3	LINC01214	142	-14.58	142	-14.58	11508	20	2194	1710
hsa-miR-1276	ENSG00000243550	ENST00000670456.1	LINC01214	152	-15.02	152	-15.02	11516	20	2949	2371
hsa-miR-1276	ENSG00000260918	ENST00000562284.1	AC107398.3	433	-42.63	148	-15.17	11520	20	7000	5466	4159	5737
hsa-miR-1276	ENSG00000284968	ENST00000508280.6	AC093827.4	157	-27.59	157	-27.59	11564	20	2158	216
hsa-miR-1276	ENSG00000284968	ENST00000506484.1	AC093827.4	157	-27.59	157	-27.59	11565	20	898	193
hsa-miR-1276	ENSG00000284968	ENST00000509262.1	AC093827.4	157	-27.59	157	-27.59	11566	20	434	57
hsa-miR-1276	ENSG00000250978	ENST00000515184.2	AC079467.1	140	-10.86	140	-10.86	11570	20	2570	896
hsa-miR-1276	ENSG00000250978	ENST00000814276.1	AC079467.1	140	-10.86	140	-10.86	11572	20	907	657
hsa-miR-1276	ENSG00000250978	ENST00000814278.1	AC079467.1	140	-10.86	140	-10.86	11573	20	1032	783
hsa-miR-1276	ENSG00000250978	ENST00000814279.1	AC079467.1	140	-10.86	140	-10.86	11574	20	752	506
hsa-miR-1276	ENSG00000250978	ENST00000814277.1	AC079467.1	140	-10.86	140	-10.86	11575	20	1067	821
hsa-miR-1276	ENSG00000250978	ENST00000814280.1	AC079467.1	140	-10.86	140	-10.86	11576	20	1028	788
hsa-miR-1276	ENSG00000261211	ENST00000563225.2	AL031123.2	145	-13.4	145	-13.4	11582	20	6640	2123
hsa-miR-1276	ENSG00000285216	ENST00000790388.1	AL355499.2	148	-14.76	148	-14.76	11585	20	1377	825
hsa-miR-1276	ENSG00000285216	ENST00000790389.1	AL355499.2	148	-14.76	148	-14.76	11588	20	1518	966
hsa-miR-1276	ENSG00000285216	ENST00000790390.1	AL355499.2	148	-14.76	148	-14.76	11589	20	1335	788
hsa-miR-1276	ENSG00000232316	ENST00000835061.1	LINC02518	140	-17.7	140	-17.7	11603	20	707	301
hsa-miR-1276	ENSG00000236039	ENST00000636929.1	AC019117.1	140	-8.05	140	-8.05	11659	20	1462	630
hsa-miR-1276	ENSG00000236039	ENST00000658415.1	AC019117.1	140	-8.05	140	-8.05	11661	20	1998	573
hsa-miR-1276	ENSG00000236039	ENST00000664658.1	AC019117.1	140	-8.05	140	-8.05	11662	20	1786	537
hsa-miR-1276	ENSG00000236039	ENST00000454003.2	AC019117.1	140	-8.05	140	-8.05	11663	20	1721	347
hsa-miR-1276	ENSG00000236039	ENST00000658953.1	AC019117.1	140	-8.05	140	-8.05	11664	20	1852	603
hsa-miR-1276	ENSG00000236039	ENST00000659688.1	AC019117.1	140	-8.05	140	-8.05	11665	20	1971	603
hsa-miR-1276	ENSG00000236039	ENST00000657616.1	AC019117.1	140	-8.05	140	-8.05	11666	20	1937	563
hsa-miR-1276	ENSG00000236039	ENST00000655831.1	AC019117.1	140	-8.05	140	-8.05	11667	20	1816	563
hsa-miR-1276	ENSG00000236039	ENST00000668924.1	AC019117.1	140	-8.05	140	-8.05	11669	20	1943	556
hsa-miR-1276	ENSG00000236039	ENST00000665552.1	AC019117.1	140	-8.05	140	-8.05	11672	20	1314	654
hsa-miR-1276	ENSG00000236039	ENST00000663308.1	AC019117.1	140	-8.05	140	-8.05	11673	20	1397	556
hsa-miR-1276	ENSG00000236039	ENST00000652982.1	AC019117.1	140	-8.05	140	-8.05	11674	20	1421	594
hsa-miR-1276	ENSG00000236039	ENST00000654345.1	AC019117.1	140	-8.05	140	-8.05	11675	20	1098	338
hsa-miR-1276	ENSG00000236039	ENST00000670938.1	AC019117.1	140	-8.05	140	-8.05	11676	20	1382	622
hsa-miR-1276	ENSG00000122548	ENST00000242109.6	KIAA0087	304	-36.09	157	-18.83	11684	20	4354	4044	3646
hsa-miR-1276	ENSG00000254109	ENST00000792122.1	RBPMS-AS1	152	-15.33	152	-15.33	11700	20	1520	429
hsa-miR-1276	ENSG00000254109	ENST00000792123.1	RBPMS-AS1	152	-15.33	152	-15.33	11701	20	1293	433
hsa-miR-1276	ENSG00000254109	ENST00000523643.6	RBPMS-AS1	152	-15.33	152	-15.33	11702	20	1372	522
hsa-miR-1276	ENSG00000254109	ENST00000792128.1	RBPMS-AS1	152	-15.33	152	-15.33	11703	20	1005	596
hsa-miR-1276	ENSG00000254109	ENST00000792131.1	RBPMS-AS1	152	-15.33	152	-15.33	11704	20	735	357
hsa-miR-1276	ENSG00000254109	ENST00000792127.1	RBPMS-AS1	152	-15.33	152	-15.33	11705	20	1015	637
hsa-miR-1276	ENSG00000254109	ENST00000792130.1	RBPMS-AS1	152	-15.33	152	-15.33	11706	20	575	198
hsa-miR-1276	ENSG00000254109	ENST00000792129.1	RBPMS-AS1	152	-15.33	152	-15.33	11707	20	723	347
hsa-miR-1276	ENSG00000254109	ENST00000792126.1	RBPMS-AS1	152	-15.33	152	-15.33	11708	20	816	440
hsa-miR-1276	ENSG00000254109	ENST00000792125.1	RBPMS-AS1	152	-15.33	152	-15.33	11709	20	715	339
hsa-miR-1276	ENSG00000254109	ENST00000792124.1	RBPMS-AS1	152	-15.33	152	-15.33	11710	20	582	206
hsa-miR-1276	ENSG00000254109	ENST00000519753.2	RBPMS-AS1	152	-15.33	152	-15.33	11711	20	1036	660
hsa-miR-1276	ENSG00000254109	ENST00000517521.5	RBPMS-AS1	152	-15.33	152	-15.33	11712	20	909	533
hsa-miR-1276	ENSG00000254109	ENST00000792133.1	RBPMS-AS1	152	-15.33	152	-15.33	11713	20	1029	658
hsa-miR-1276	ENSG00000254109	ENST00000792132.1	RBPMS-AS1	152	-15.33	152	-15.33	11714	20	951	580
hsa-miR-1276	ENSG00000272043	ENST00000607393.3	AC016405.2	161	-19.33	161	-19.33	11718	20	1018	411
hsa-miR-1276	ENSG00000227121	ENST00000668157.1	AC073174.1	152	-16.22	152	-16.22	11727	20	1613	1003
hsa-miR-1276	ENSG00000227121	ENST00000654808.1	AC073174.1	152	-16.22	152	-16.22	11728	20	1540	930
hsa-miR-1276	ENSG00000242288	ENST00000399449.3	AC022400.3	140	-10.16	140	-10.16	11733	20	3810	3155
hsa-miR-1276	ENSG00000237523	ENST00000819791.1	LINC00857	145	-16.75	145	-16.75	11734	20	1632	638
hsa-miR-1276	ENSG00000237523	ENST00000660450.2	LINC00857	145	-16.75	145	-16.75	11735	20	2499	458
hsa-miR-1276	ENSG00000237523	ENST00000819796.1	LINC00857	145	-16.75	145	-16.75	11736	20	1199	450
hsa-miR-1276	ENSG00000237523	ENST00000819795.1	LINC00857	145	-16.75	145	-16.75	11737	20	1223	434
hsa-miR-1276	ENSG00000237523	ENST00000819793.1	LINC00857	145	-16.75	145	-16.75	11738	20	1167	430
hsa-miR-1276	ENSG00000237523	ENST00000819800.1	LINC00857	145	-16.75	145	-16.75	11739	20	1377	423
hsa-miR-1276	ENSG00000237523	ENST00000671081.2	LINC00857	145	-16.75	145	-16.75	11740	20	2474	423
hsa-miR-1276	ENSG00000237523	ENST00000819794.1	LINC00857	145	-16.75	145	-16.75	11742	20	1166	419
hsa-miR-1276	ENSG00000237523	ENST00000819798.1	LINC00857	145	-16.75	145	-16.75	11743	20	2088	418
hsa-miR-1276	ENSG00000237523	ENST00000819799.1	LINC00857	145	-16.75	145	-16.75	11744	20	1161	401
hsa-miR-1276	ENSG00000237523	ENST00000819792.1	LINC00857	145	-16.75	145	-16.75	11745	20	1531	154
hsa-miR-1276	ENSG00000237523	ENST00000422847.1	LINC00857	145	-16.75	145	-16.75	11746	20	2161	120
hsa-miR-1276	ENSG00000269609	ENST00000755291.1	RPARP-AS1	145	-14.15	145	-14.15	11748	20	748	386
hsa-miR-1276	ENSG00000269609	ENST00000597488.1	RPARP-AS1	140	-10.8	140	-10.8	11769	20	1938	1097
hsa-miR-1276	ENSG00000269609	ENST00000598368.2	RPARP-AS1	140	-11.81	140	-11.81	11770	20	2458	49
hsa-miR-1276	ENSG00000255367	ENST00000822354.1	AC127526.2	142	-18.47	142	-18.47	11847	20	1060	832
hsa-miR-1276	ENSG00000255367	ENST00000717885.1	AC127526.2	160	-22.19	160	-22.19	11852	20	843	444
hsa-miR-1276	ENSG00000255367	ENST00000717887.1	AC127526.2	140	-13.07	140	-13.07	11854	20	1115	968
hsa-miR-1276	ENSG00000255367	ENST00000717893.1	AC127526.2	142	-14.53	142	-14.53	11861	20	1047	775
hsa-miR-1276	ENSG00000255367	ENST00000717894.1	AC127526.2	142	-14.53	142	-14.53	11862	20	656	513
hsa-miR-1276	ENSG00000255970	ENST00000829389.1	LINC02421	144	-13.87	144	-13.87	11913	20	521	64
hsa-miR-1276	ENSG00000241388	ENST00000647473.1	HNF1A-AS1	281	-28.96	141	-16.95	11917	20	1144	999	986
hsa-miR-1276	ENSG00000241388	ENST00000760047.1	HNF1A-AS1	149	-17.43	149	-17.43	11922	20	754	333
hsa-miR-1276	ENSG00000241388	ENST00000539163.1	HNF1A-AS1	155	-18.53	155	-18.53	11926	20	2455	573
hsa-miR-1276	ENSG00000276476	ENST00000721759.1	LINC00540	151	-12	151	-12	11932	20	1488	630
hsa-miR-1276	ENSG00000276476	ENST00000721762.1	LINC00540	151	-12	151	-12	11938	20	1020	573
hsa-miR-1276	ENSG00000276476	ENST00000721763.1	LINC00540	151	-12	151	-12	11939	20	1409	962
hsa-miR-1276	ENSG00000276476	ENST00000721760.1	LINC00540	151	-12	151	-12	11940	20	1501	643
hsa-miR-1276	ENSG00000276476	ENST00000721761.1	LINC00540	151	-12	151	-12	11943	20	1796	938
hsa-miR-1276	ENSG00000235269	ENST00000728987.1	LINC02331	153	-14.63	153	-14.63	11960	20	2327	2127
hsa-miR-1276	ENSG00000235269	ENST00000728988.1	LINC02331	153	-14.63	153	-14.63	11961	20	2086	2006
hsa-miR-1276	ENSG00000235269	ENST00000418927.3	LINC02331	153	-14.63	153	-14.63	11962	20	2316	2247
hsa-miR-1276	ENSG00000259230	ENST00000716868.1	LINC02323	140	-24.33	140	-24.33	11967	20	1764	173
hsa-miR-1276	ENSG00000259230	ENST00000716869.1	LINC02323	140	-24.33	140	-24.33	11968	20	1009	159
hsa-miR-1276	ENSG00000259230	ENST00000559946.1	LINC02323	140	-24.33	140	-24.33	11969	20	1603	142
hsa-miR-1276	ENSG00000236914	ENST00000559232.2	LINC01852	157	-16.76	157	-16.76	12002	20	2200	472
hsa-miR-1276	ENSG00000236914	ENST00000728309.1	LINC01852	157	-16.76	157	-16.76	12003	20	1960	457
hsa-miR-1276	ENSG00000236914	ENST00000657585.2	LINC01852	157	-16.76	157	-16.76	12004	20	1645	578
hsa-miR-1276	ENSG00000236914	ENST00000434223.3	LINC01852	157	-16.76	157	-16.76	12006	20	967	165
hsa-miR-1276	ENSG00000236914	ENST00000560198.1	LINC01852	157	-16.76	157	-16.76	12007	20	942	441
hsa-miR-1276	ENSG00000262294	ENST00000792825.1	AC129507.2	145	-25.29	145	-25.29	12010	20	1187	491
hsa-miR-1276	ENSG00000262294	ENST00000717666.1	AC129507.2	145	-25.29	145	-25.29	12011	20	1972	1329
hsa-miR-1276	ENSG00000262294	ENST00000717667.1	AC129507.2	145	-25.29	145	-25.29	12013	20	1001	305
hsa-miR-1276	ENSG00000262294	ENST00000571512.2	AC129507.2	145	-25.29	145	-25.29	12014	20	1612	916
hsa-miR-1276	ENSG00000266968	ENST00000590535.2	AC023421.1	158	-22.35	158	-22.35	12028	20	1785	340
hsa-miR-1276	ENSG00000277837	ENST00000620778.1	AC090340.1	144	-17.66	144	-17.66	12029	20	4980	2079
hsa-miR-1276	ENSG00000226328	ENST00000426282.7	NUP50-AS1	156	-17.26	156	-17.26	12126	20	2095	481
hsa-miR-1276	ENSG00000226328	ENST00000665704.1	NUP50-AS1	156	-17.26	156	-17.26	12127	20	2031	1098
hsa-miR-1276	ENSG00000226328	ENST00000609284.3	NUP50-AS1	156	-17.26	156	-17.26	12128	20	1698	770
hsa-miR-1276	ENSG00000226328	ENST00000816418.1	NUP50-AS1	156	-17.26	156	-17.26	12129	20	1479	598
hsa-miR-1276	ENSG00000226328	ENST00000816422.1	NUP50-AS1	156	-17.26	156	-17.26	12130	20	847	499
hsa-miR-1276	ENSG00000226328	ENST00000816419.1	NUP50-AS1	156	-17.26	156	-17.26	12131	20	797	449
hsa-miR-1276	ENSG00000226328	ENST00000702308.2	NUP50-AS1	156	-17.26	156	-17.26	12132	20	803	458
hsa-miR-1276	ENSG00000226328	ENST00000432502.1	NUP50-AS1	156	-17.26	156	-17.26	12133	20	596	252
hsa-miR-1276	ENSG00000226328	ENST00000816429.1	NUP50-AS1	156	-17.26	156	-17.26	12134	20	700	356
hsa-miR-1276	ENSG00000226328	ENST00000816427.1	NUP50-AS1	156	-17.26	156	-17.26	12135	20	902	558
hsa-miR-1276	ENSG00000226328	ENST00000816428.1	NUP50-AS1	156	-17.26	156	-17.26	12136	20	712	368
hsa-miR-1276	ENSG00000226328	ENST00000816426.1	NUP50-AS1	156	-17.26	156	-17.26	12137	20	926	582
hsa-miR-1276	ENSG00000226328	ENST00000816425.1	NUP50-AS1	156	-17.26	156	-17.26	12138	20	959	615
hsa-miR-1276	ENSG00000226328	ENST00000816424.1	NUP50-AS1	156	-17.26	156	-17.26	12139	20	1005	661
hsa-miR-1276	ENSG00000226328	ENST00000816423.1	NUP50-AS1	156	-17.26	156	-17.26	12140	20	653	309
hsa-miR-1276	ENSG00000226328	ENST00000816421.1	NUP50-AS1	156	-17.26	156	-17.26	12141	20	1031	687
hsa-miR-1276	ENSG00000226328	ENST00000816420.1	NUP50-AS1	156	-17.26	156	-17.26	12142	20	923	579
hsa-miR-1276	ENSG00000231535	ENST00000444263.6	LINC00278	140	-13.74	140	-13.74	12167	20	1209	1052
hsa-miR-1197	ENSG00000284708	ENST00000642131.1	AL031731.1	155	-17.86	155	-17.86	12181	21	2094	1867
hsa-miR-1197	ENSG00000224259	ENST00000635112.2	LINC01133	154	-16.58	154	-16.58	12193	21	2363	803
hsa-miR-1197	ENSG00000260101	ENST00000561559.3	AC008074.3	159	-22.87	159	-22.87	12214	21	2599	2451
hsa-miR-1197	ENSG00000260101	ENST00000789328.1	AC008074.3	159	-22.87	159	-22.87	12215	21	2163	2015
hsa-miR-1197	ENSG00000228791	ENST00000594183.1	THRB-AS1	147	-18.28	147	-18.28	12267	21	837	12
hsa-miR-1197	ENSG00000228791	ENST00000807238.1	THRB-AS1	144	-13.46	144	-13.46	12272	21	635	428
hsa-miR-1197	ENSG00000228791	ENST00000807239.1	THRB-AS1	144	-13.46	144	-13.46	12273	21	575	368
hsa-miR-1197	ENSG00000243550	ENST00000749939.1	LINC01214	142	-17.23	142	-17.23	12296	21	418	1
hsa-miR-1197	ENSG00000243550	ENST00000749938.1	LINC01214	142	-17.23	142	-17.23	12297	21	607	206
hsa-miR-1197	ENSG00000243550	ENST00000716187.1	LINC01214	140	-13.86	140	-13.86	12316	21	933	143
hsa-miR-1197	ENSG00000243550	ENST00000692847.3	LINC01214	289	-30.84	149	-15.95	12320	21	2194	968	440
hsa-miR-1197	ENSG00000243550	ENST00000670456.1	LINC01214	142	-16.05	142	-16.05	12328	21	2949	1848
hsa-miR-1197	ENSG00000243550	ENST00000716190.1	LINC01214	140	-13.86	140	-13.86	12329	21	1090	141
hsa-miR-1197	ENSG00000260918	ENST00000562284.1	AC107398.3	294	-38.04	149	-21.39	12332	21	7000	6068	2297
hsa-miR-1197	ENSG00000251442	ENST00000671622.2	LINC01094	141	-14.59	141	-14.59	12336	21	2989	168
hsa-miR-1197	ENSG00000251442	ENST00000778503.1	LINC01094	141	-14.59	141	-14.59	12337	21	1691	126
hsa-miR-1197	ENSG00000251442	ENST00000503259.6	LINC01094	141	-14.59	141	-14.59	12338	21	2560	107
hsa-miR-1197	ENSG00000251442	ENST00000656991.2	LINC01094	141	-14.59	141	-14.59	12339	21	2393	91
hsa-miR-1197	ENSG00000251442	ENST00000503539.8	LINC01094	141	-14.59	141	-14.59	12340	21	2509	91
hsa-miR-1197	ENSG00000251442	ENST00000507802.6	LINC01094	141	-14.59	141	-14.59	12341	21	2485	52
hsa-miR-1197	ENSG00000251442	ENST00000778522.1	LINC01094	141	-14.59	141	-14.59	12342	21	726	44
hsa-miR-1197	ENSG00000251442	ENST00000687467.2	LINC01094	141	-14.59	141	-14.59	12343	21	2119	33
hsa-miR-1197	ENSG00000251442	ENST00000778504.1	LINC01094	141	-14.59	141	-14.59	12344	21	854	13
hsa-miR-1197	ENSG00000251442	ENST00000778523.1	LINC01094	140	-20.46	140	-20.46	12357	21	2647	549
hsa-miR-1197	ENSG00000250978	ENST00000515184.2	AC079467.1	149	-16.51	149	-16.51	12382	21	2570	720
hsa-miR-1197	ENSG00000250978	ENST00000814276.1	AC079467.1	149	-16.51	149	-16.51	12384	21	907	481
hsa-miR-1197	ENSG00000250978	ENST00000814278.1	AC079467.1	149	-16.51	149	-16.51	12385	21	1032	607
hsa-miR-1197	ENSG00000250978	ENST00000814279.1	AC079467.1	149	-16.51	149	-16.51	12386	21	752	330
hsa-miR-1197	ENSG00000250978	ENST00000814277.1	AC079467.1	149	-16.51	149	-16.51	12387	21	1067	645
hsa-miR-1197	ENSG00000250978	ENST00000814280.1	AC079467.1	149	-16.51	149	-16.51	12388	21	1028	612
hsa-miR-1197	ENSG00000261211	ENST00000841942.1	AL031123.2	145	-13.97	145	-13.97	12393	21	1026	467
hsa-miR-1197	ENSG00000261211	ENST00000563225.2	AL031123.2	291	-32.56	146	-18.59	12394	21	6640	4659	6081
hsa-miR-1197	ENSG00000261211	ENST00000692730.2	AL031123.2	145	-13.97	145	-13.97	12395	21	1031	474
hsa-miR-1197	ENSG00000261211	ENST00000691726.1	AL031123.2	145	-13.97	145	-13.97	12396	21	1223	682
hsa-miR-1197	ENSG00000234155	ENST00000840426.1	LINC02535	292	-38.58	150	-21.25	12411	21	2606	2217	1505
hsa-miR-1197	ENSG00000234155	ENST00000455071.2	LINC02535	292	-38.58	150	-21.25	12412	21	2576	2187	1475
hsa-miR-1197	ENSG00000237070	ENST00000451240.1	AC005550.2	143	-15.1	143	-15.1	12470	21	3743	2514
hsa-miR-1197	ENSG00000236039	ENST00000636929.1	AC019117.1	148	-17.58	148	-17.58	12471	21	1462	65
hsa-miR-1197	ENSG00000236039	ENST00000658415.1	AC019117.1	148	-17.58	148	-17.58	12473	21	1998	57
hsa-miR-1197	ENSG00000236039	ENST00000664658.1	AC019117.1	148	-17.58	148	-17.58	12474	21	1786	21
hsa-miR-1197	ENSG00000236039	ENST00000454003.2	AC019117.1	148	-17.58	148	-17.58	12475	21	1721	38
hsa-miR-1197	ENSG00000236039	ENST00000658953.1	AC019117.1	148	-17.58	148	-17.58	12476	21	1852	38
hsa-miR-1197	ENSG00000236039	ENST00000659688.1	AC019117.1	148	-17.58	148	-17.58	12477	21	1971	38
hsa-miR-1197	ENSG00000236039	ENST00000657616.1	AC019117.1	148	-17.58	148	-17.58	12478	21	1937	47
hsa-miR-1197	ENSG00000236039	ENST00000655831.1	AC019117.1	148	-17.58	148	-17.58	12479	21	1816	47
hsa-miR-1197	ENSG00000236039	ENST00000659904.1	AC019117.1	148	-17.58	148	-17.58	12480	21	1875	57
hsa-miR-1197	ENSG00000236039	ENST00000668924.1	AC019117.1	148	-17.58	148	-17.58	12481	21	1943	40
hsa-miR-1197	ENSG00000236039	ENST00000656566.1	AC019117.1	148	-17.58	148	-17.58	12482	21	1357	47
hsa-miR-1197	ENSG00000236039	ENST00000662264.1	AC019117.1	148	-17.58	148	-17.58	12483	21	1324	33
hsa-miR-1197	ENSG00000236039	ENST00000665552.1	AC019117.1	148	-17.58	148	-17.58	12484	21	1314	35
hsa-miR-1197	ENSG00000236039	ENST00000663308.1	AC019117.1	148	-17.58	148	-17.58	12485	21	1397	40
hsa-miR-1197	ENSG00000236039	ENST00000652982.1	AC019117.1	148	-17.58	148	-17.58	12486	21	1421	29
hsa-miR-1197	ENSG00000236039	ENST00000654345.1	AC019117.1	148	-17.58	148	-17.58	12487	21	1098	29
hsa-miR-1197	ENSG00000236039	ENST00000670938.1	AC019117.1	148	-17.58	148	-17.58	12488	21	1382	57
hsa-miR-1197	ENSG00000236039	ENST00000660262.1	AC019117.1	148	-17.58	148	-17.58	12489	21	624	57
hsa-miR-1197	ENSG00000236039	ENST00000451792.1	AC019117.1	144	-21.2	144	-21.2	12490	21	442	143
hsa-miR-1197	ENSG00000236039	ENST00000843692.1	AC019117.1	148	-17.58	148	-17.58	12491	21	553	23
hsa-miR-1197	ENSG00000236039	ENST00000843695.1	AC019117.1	141	-16.5	141	-16.5	12492	21	573	14
hsa-miR-1197	ENSG00000236039	ENST00000843693.1	AC019117.1	148	-17.58	148	-17.58	12493	21	539	47
hsa-miR-1197	ENSG00000236039	ENST00000843694.1	AC019117.1	144	-16.5	144	-16.5	12494	21	289	153
hsa-miR-1197	ENSG00000122548	ENST00000242109.6	KIAA0087	141	-16.6	141	-16.6	12496	21	4354	3645
hsa-miR-1197	ENSG00000261655	ENST00000562459.1	AC100803.2	152	-18.99	152	-18.99	12531	21	1963	578
hsa-miR-1197	ENSG00000260677	ENST00000562653.1	AL445531.1	156	-18.28	156	-18.28	12532	21	1728	888
hsa-miR-1197	ENSG00000227121	ENST00000765539.1	AC073174.1	150	-17.05	150	-17.05	12543	21	1078	411
hsa-miR-1197	ENSG00000227121	ENST00000765540.1	AC073174.1	150	-17.05	150	-17.05	12544	21	1091	426
hsa-miR-1197	ENSG00000237523	ENST00000819792.1	LINC00857	143	-14.08	143	-14.08	12557	21	1531	1450
hsa-miR-1197	ENSG00000255367	ENST00000717870.1	AC127526.2	144	-19.47	144	-19.47	12642	21	1170	934
hsa-miR-1197	ENSG00000255367	ENST00000717881.1	AC127526.2	143	-16.96	143	-16.96	12656	21	2910	1373
hsa-miR-1197	ENSG00000254682	ENST00000529369.3	AP002387.2	150	-17.66	150	-17.66	12681	21	820	460
hsa-miR-1197	ENSG00000241388	ENST00000539163.1	HNF1A-AS1	142	-12.56	142	-12.56	12738	21	2455	402
hsa-miR-1197	ENSG00000276476	ENST00000721755.1	LINC00540	142	-19.93	142	-19.93	12742	21	2390	2003
hsa-miR-1197	ENSG00000276476	ENST00000690279.2	LINC00540	142	-19.93	142	-19.93	12753	21	2546	2159
hsa-miR-1197	ENSG00000276476	ENST00000631321.1	LINC00540	142	-19.93	142	-19.93	12754	21	2412	1931
hsa-miR-1197	ENSG00000276476	ENST00000659301.2	LINC00540	142	-19.93	142	-19.93	12757	21	2228	1747
hsa-miR-1197	ENSG00000276476	ENST00000655363.2	LINC00540	142	-19.93	142	-19.93	12759	21	2215	1732
hsa-miR-1197	ENSG00000276476	ENST00000616974.1	LINC00540	142	-19.93	142	-19.93	12760	21	2143	1665
hsa-miR-1197	ENSG00000276476	ENST00000658741.1	LINC00540	142	-19.93	142	-19.93	12761	21	2206	1723
hsa-miR-1197	ENSG00000258548	ENST00000557359.6	LINC00645	142	-18.57	142	-18.57	12766	21	3495	2461
hsa-miR-1197	ENSG00000258548	ENST00000663380.1	LINC00645	142	-18.57	142	-18.57	12767	21	3213	2344
hsa-miR-1197	ENSG00000258548	ENST00000557399.1	LINC00645	142	-18.57	142	-18.57	12768	21	3512	2478
hsa-miR-1197	ENSG00000258548	ENST00000669384.1	LINC00645	142	-18.57	142	-18.57	12769	21	3394	2462
hsa-miR-1197	ENSG00000259230	ENST00000716870.1	LINC02323	147	-18.57	147	-18.57	12783	21	1370	599
hsa-miR-1197	ENSG00000259230	ENST00000766588.1	LINC02323	147	-18.57	147	-18.57	12785	21	1118	333
hsa-miR-1197	ENSG00000259230	ENST00000766589.1	LINC02323	147	-18.57	147	-18.57	12786	21	787	231
hsa-miR-1197	ENSG00000259230	ENST00000766592.1	LINC02323	147	-18.57	147	-18.57	12789	21	1029	473
hsa-miR-1197	ENSG00000259230	ENST00000766593.1	LINC02323	147	-18.57	147	-18.57	12790	21	863	112
hsa-miR-1197	ENSG00000259230	ENST00000766599.1	LINC02323	153	-18.08	153	-18.08	12796	21	1036	568
hsa-miR-1197	ENSG00000259230	ENST00000766600.1	LINC02323	153	-18.08	153	-18.08	12797	21	920	452
hsa-miR-1197	ENSG00000262823	ENST00000576086.2	AC127521.1	305	-39.77	159	-20.34	12830	21	1053	736	467
hsa-miR-1197	ENSG00000262823	ENST00000577176.1	AC127521.1	305	-39.77	159	-20.34	12831	21	696	512	243
hsa-miR-1197	ENSG00000262823	ENST00000577064.1	AC127521.1	305	-39.77	159	-20.34	12832	21	575	520	251
hsa-miR-1197	ENSG00000236377	ENST00000704359.1	AC084809.2	149	-14.38	149	-14.38	12834	21	1043	575
hsa-miR-1197	ENSG00000236377	ENST00000435733.2	AC084809.2	149	-14.38	149	-14.38	12835	21	3024	542
hsa-miR-1197	ENSG00000236377	ENST00000704362.1	AC084809.2	149	-14.38	149	-14.38	12836	21	1050	611
hsa-miR-1197	ENSG00000236377	ENST00000444464.2	AC084809.2	149	-14.38	149	-14.38	12837	21	1127	566
hsa-miR-1197	ENSG00000268108	ENST00000597865.1	AC008687.2	140	-13.13	140	-13.13	12851	21	520	384
hsa-miR-1197	ENSG00000277067	ENST00000782238.1	CU634019.1	159	-24.25	159	-24.25	12881	21	2245	1590
hsa-miR-1197	ENSG00000232079	ENST00000426534.2	LINC01697	143	-14.76	143	-14.76	12915	21	1764	977
hsa-miR-1197	ENSG00000249923	ENST00000506039.2	AC007663.2	158	-20.35	158	-20.35	12926	21	2513	1938
hsa-miR-1197	ENSG00000236393	ENST00000738318.1	AC091806.1	150	-17.93	150	-17.93	12959	21	1912	553
hsa-miR-1197	ENSG00000236393	ENST00000452690.1	AC091806.1	150	-17.93	150	-17.93	12960	21	3000	176
hsa-miR-1197	ENSG00000236393	ENST00000447570.2	AC091806.1	290	-33.23	150	-17.93	12961	21	1959	127	1472
hsa-miR-1197	ENSG00000236393	ENST00000653973.1	AC091806.1	150	-17.93	150	-17.93	12962	21	724	84
hsa-miR-1197	ENSG00000284377	ENST00000741838.1	AL589669.1	147	-14.75	147	-14.75	12972	21	1035	452
hsa-miR-485-5p	ENSG00000284708	ENST00000642131.1	AL031731.1	459	-55.64	157	-19.52	12993	22	2094	13	150	1110
hsa-miR-485-5p	ENSG00000224259	ENST00000772302.1	LINC01133	141	-20.59	141	-20.59	12995	22	564	514
hsa-miR-485-5p	ENSG00000224259	ENST00000772304.1	LINC01133	141	-20.59	141	-20.59	12999	22	1354	487
hsa-miR-485-5p	ENSG00000224259	ENST00000772308.1	LINC01133	303	-37.87	154	-20.91	13003	22	527	308	344
hsa-miR-485-5p	ENSG00000224259	ENST00000635112.2	LINC01133	149	-21.98	149	-21.98	13005	22	2363	750
hsa-miR-485-5p	ENSG00000282221	ENST00000633182.2	AC119427.1	307	-42.27	167	-25.82	13024	22	924	806	508
hsa-miR-485-5p	ENSG00000204792	ENST00000840152.1	LINC01291	147	-20.68	147	-20.68	13031	22	1538	137
hsa-miR-485-5p	ENSG00000204792	ENST00000840157.1	LINC01291	147	-20.68	147	-20.68	13032	22	645	131
hsa-miR-485-5p	ENSG00000204792	ENST00000840154.1	LINC01291	147	-20.68	147	-20.68	13033	22	1282	131
hsa-miR-485-5p	ENSG00000204792	ENST00000418204.2	LINC01291	147	-20.68	147	-20.68	13034	22	1619	130
hsa-miR-485-5p	ENSG00000204792	ENST00000840155.1	LINC01291	147	-20.68	147	-20.68	13035	22	1632	130
hsa-miR-485-5p	ENSG00000204792	ENST00000840153.1	LINC01291	147	-20.68	147	-20.68	13036	22	1575	130
hsa-miR-485-5p	ENSG00000204792	ENST00000840156.1	LINC01291	147	-20.68	147	-20.68	13037	22	1524	128
hsa-miR-485-5p	ENSG00000253559	ENST00000520651.2	OSGEPL1-AS1	141	-16.85	141	-16.85	13062	22	514	370
hsa-miR-485-5p	ENSG00000253559	ENST00000521819.2	OSGEPL1-AS1	141	-16.85	141	-16.85	13063	22	874	253
hsa-miR-485-5p	ENSG00000253559	ENST00000523895.1	OSGEPL1-AS1	141	-16.85	141	-16.85	13064	22	567	175
hsa-miR-485-5p	ENSG00000228791	ENST00000629562.3	THRB-AS1	150	-23.32	150	-23.32	13069	22	2257	2030
hsa-miR-485-5p	ENSG00000273033	ENST00000610128.2	LINC02035	449	-60.75	168	-28.05	13086	22	5476	3277	2664	3537
hsa-miR-485-5p	ENSG00000273033	ENST00000809469.1	LINC02035	140	-15.88	140	-15.88	13087	22	1302	67
hsa-miR-485-5p	ENSG00000260918	ENST00000562284.1	AC107398.3	144	-13.3	144	-13.3	13144	22	7000	2490
hsa-miR-485-5p	ENSG00000251442	ENST00000701241.1	LINC01094	157	-28.02	157	-28.02	13158	22	1831	313
hsa-miR-485-5p	ENSG00000251442	ENST00000514130.6	LINC01094	157	-28.02	157	-28.02	13163	22	2095	218
hsa-miR-485-5p	ENSG00000251442	ENST00000512322.2	LINC01094	157	-28.02	157	-28.02	13165	22	2225	153
hsa-miR-485-5p	ENSG00000251442	ENST00000654792.1	LINC01094	157	-28.02	157	-28.02	13167	22	1778	135
hsa-miR-485-5p	ENSG00000251442	ENST00000667455.1	LINC01094	157	-28.02	157	-28.02	13170	22	2266	110
hsa-miR-485-5p	ENSG00000251442	ENST00000778505.1	LINC01094	309	-36.25	156	-19.46	13173	22	1070	235	368
hsa-miR-485-5p	ENSG00000251442	ENST00000778515.1	LINC01094	309	-36.25	156	-19.46	13181	22	968	133	266
hsa-miR-485-5p	ENSG00000251442	ENST00000778514.1	LINC01094	452	-54.89	156	-19.46	13182	22	1151	308	441	121
hsa-miR-485-5p	ENSG00000251442	ENST00000778516.1	LINC01094	309	-36.25	156	-19.46	13183	22	1033	198	331
hsa-miR-485-5p	ENSG00000251442	ENST00000778518.1	LINC01094	309	-36.25	156	-19.46	13186	22	611	312	445
hsa-miR-485-5p	ENSG00000251442	ENST00000778517.1	LINC01094	309	-36.25	156	-19.46	13187	22	1030	195	328
hsa-miR-485-5p	ENSG00000284968	ENST00000508280.6	AC093827.4	157	-19.52	157	-19.52	13188	22	2158	421
hsa-miR-485-5p	ENSG00000284968	ENST00000506484.1	AC093827.4	157	-19.52	157	-19.52	13189	22	898	398
hsa-miR-485-5p	ENSG00000271119	ENST00000605200.1	AC026412.3	147	-17.56	147	-17.56	13193	22	1661	773
hsa-miR-485-5p	ENSG00000272320	ENST00000607565.1	AL445309.1	149	-14.44	149	-14.44	13204	22	1989	835
hsa-miR-485-5p	ENSG00000261211	ENST00000563225.2	AL031123.2	148	-18.83	148	-18.83	13206	22	6640	1406
hsa-miR-485-5p	ENSG00000285216	ENST00000790388.1	AL355499.2	145	-14.8	145	-14.8	13209	22	1377	135
[truncated: 7,547 more rows]
[truncated: 1 more columns]
